# Supplementary material for: The influence of biological, epidemiological, and treatment factors on the establishment and spread of drug-resistant Plasmodium falciparum
Source: eLife. 2022 Jul 7;11:e77634. doi: 10.7554/eLife.77634 (PMC9262398; doi:10.7554/eLife.77634)
Supplement: Appendix 1—figure 7—source data 1. [file elife-77634-app1-fig7-data1.csv]

Test_True	Test_predicted	EIR	Access_treatment	Resistance_level	Seasonality_pattern	Adherence_treatment
0.0203489393187204	0.0195498771926799	5	0.04	7	No seasonality	Low
-0.055783552572668	-0.0616551907993697	5	0.04	7	No seasonality	Low
-0.0343052152728506	-0.0348801444498378	5	0.04	7	No seasonality	Low
-0.046714151524013	-0.0478230704901762	5	0.04	7	No seasonality	Low
-0.0345372987997026	-0.0345551185348581	5	0.04	7	No seasonality	Low
-0.0218255867550187	-0.0197892241985442	5	0.04	7	No seasonality	Low
-0.0349833670353355	-0.0340872230820123	5	0.04	7	No seasonality	Low
-0.0054141421699377	-0.00363285445980397	5	0.04	7	No seasonality	Low
-0.0149404644122855	-0.0165244597053502	5	0.04	7	No seasonality	Low
-0.0383233222666071	-0.0392994577758986	5	0.04	7	No seasonality	Low
-0.0059394111475681	-0.00878948830081709	5	0.04	7	No seasonality	Low
-0.0319789768627937	-0.0290103184677319	5	0.04	7	No seasonality	Low
-0.00975242852314085	-0.0101676545454455	5	0.04	7	No seasonality	Low
-0.046084305572503	-0.0457889126644793	5	0.04	7	No seasonality	Low
-0.0323710568850137	-0.0346889866884293	5	0.04	7	No seasonality	Low
0.0128310319145132	0.0126956516179266	5	0.04	7	No seasonality	Low
-0.0216896310832246	-0.0268703128005793	5	0.04	7	No seasonality	Low
0.00530415374807099	0.00621916683384559	5	0.04	7	No seasonality	Low
-0.00821635560398873	-0.00721646175937099	5	0.04	7	No seasonality	Low
0.0215466347692359	0.0215629804232192	5	0.04	7	No seasonality	Low
-0.0478529156087192	-0.0519725267717859	5	0.04	7	No seasonality	Low
0.014009097434255	0.0149197603750679	5	0.04	7	No seasonality	Low
-0.0571991822895602	-0.0580634762806198	5	0.04	7	No seasonality	Low
0.00191120241788829	0.00218299016959531	5	0.04	7	No seasonality	Low
-0.00429486309029983	-0.00416055003631489	5	0.04	7	No seasonality	Low
-0.0199289414234096	-0.0187469660165426	5	0.04	7	No seasonality	Low
-0.0361134335358763	-0.0374552083894123	5	0.04	7	No seasonality	Low
0.00533271234374035	0.00930190548405487	5	0.04	7	No seasonality	Low
-0.00856769747463671	-0.00816673224332435	5	0.04	7	No seasonality	Low
-0.0144028261926576	-0.00932710882231157	5	0.04	7	No seasonality	Low
0.0138324201206726	0.0162205295270179	10	0.04	7	No seasonality	Low
-0.0251465018768375	-0.0207857569302194	10	0.04	7	No seasonality	Low
-0.0457194861336085	-0.0489397537402449	10	0.04	7	No seasonality	Low
-0.0315891308997864	-0.0309755730475882	10	0.04	7	No seasonality	Low
-0.00945905461681505	-0.01277998159388	10	0.04	7	No seasonality	Low
-0.0350300747466368	-0.0354154526452901	10	0.04	7	No seasonality	Low
-0.00600616414058299	-0.00914299335051534	10	0.04	7	No seasonality	Low
-0.0259064218662471	-0.0273748231087936	10	0.04	7	No seasonality	Low
0.0146087634802151	0.0148127709243355	10	0.04	7	No seasonality	Low
0.00696012758157351	0.00388685782845717	10	0.04	7	No seasonality	Low
0.00702112293595109	-0.000518423033104603	10	0.04	7	No seasonality	Low
-0.0376608200433521	-0.0345552214760418	10	0.04	7	No seasonality	Low
-0.0631684237018499	-0.0664389188348448	10	0.04	7	No seasonality	Low
-0.0589271536940356	-0.0607861429337379	10	0.04	7	No seasonality	Low
-0.0141885536949991	-0.0164034353245062	10	0.04	7	No seasonality	Low
-0.0481837879877622	-0.0453883796434531	10	0.04	7	No seasonality	Low
-0.00428521576621281	-0.00291607707627172	10	0.04	7	No seasonality	Low
-0.059959327062767	-0.0552621628257576	10	0.04	7	No seasonality	Low
-0.0481048280809403	-0.050549466745561	10	0.04	7	No seasonality	Low
-0.0131485105821151	-0.0127917290770178	10	0.04	7	No seasonality	Low
-0.00231305203179705	-0.00288645263524801	10	0.04	7	No seasonality	Low
-0.0382767566783069	-0.0412067988019438	10	0.04	7	No seasonality	Low
-0.00989599610343765	-0.00740834385523225	10	0.04	7	No seasonality	Low
0.0170830829499572	0.0212077213200083	10	0.04	7	No seasonality	Low
-0.0347870017624812	-0.0350660323708978	10	0.04	7	No seasonality	Low
-0.0412906621017367	-0.0428401965864375	10	0.04	7	No seasonality	Low
0.000212904330033546	-0.000803435308764155	10	0.04	7	No seasonality	Low
-0.000580415363520541	0.00102314138076753	10	0.04	7	No seasonality	Low
-0.0184591139368943	-0.0172053226707843	10	0.04	7	No seasonality	Low
-0.0553267862014101	-0.0540240008348601	10	0.04	7	No seasonality	Low
-0.0976330243511814	-0.0989164117369956	500	0.04	7	No seasonality	Low
-0.0384307209522722	-0.0386896022862418	500	0.04	7	No seasonality	Low
-0.00423978600851881	-0.00566928077753723	500	0.04	7	No seasonality	Low
-0.0547625597827961	-0.0531700837036403	500	0.04	7	No seasonality	Low
-0.0139160100845353	-0.0159177649110102	500	0.04	7	No seasonality	Low
0.0120615433363189	0.0085852398726273	500	0.04	7	No seasonality	Low
-0.0239846880831325	-0.0247433135248545	500	0.04	7	No seasonality	Low
-0.0206649307307688	-0.021198789235861	500	0.04	7	No seasonality	Low
-0.060435323083466	-0.0580097236530711	500	0.04	7	No seasonality	Low
-0.0115341040030886	-0.0132901557992338	500	0.04	7	No seasonality	Low
-0.0685845243796198	-0.067982881768216	500	0.04	7	No seasonality	Low
-0.022341068225853	-0.0243097481298076	500	0.04	7	No seasonality	Low
-0.0606786053007272	-0.0597850663315834	500	0.04	7	No seasonality	Low
-0.00371825464609723	-0.00273107900254929	500	0.04	7	No seasonality	Low
-0.0642529551288141	-0.0653820490867067	500	0.04	7	No seasonality	Low
-0.0791330319029208	-0.082870561863279	500	0.04	7	No seasonality	Low
-0.0419019086722505	-0.0433349290081059	500	0.04	7	No seasonality	Low
-0.0995695053440815	-0.101833653654329	500	0.04	7	No seasonality	Low
-0.0304322513064955	-0.0333105943109951	500	0.04	7	No seasonality	Low
-0.0767512178758489	-0.078441928105705	500	0.04	7	No seasonality	Low
-0.0248898889310513	-0.026522985185102	500	0.04	7	No seasonality	Low
-0.0672999646701666	-0.0670993971231076	500	0.04	7	No seasonality	Low
0.00257129029909319	-0.000485191263534052	500	0.04	7	No seasonality	Low
-0.0209392078480036	-0.0226592839195385	500	0.04	7	No seasonality	Low
-0.0850437368351212	-0.085235902865449	500	0.04	7	No seasonality	Low
-0.0714827269854029	-0.0651227240587641	500	0.04	7	No seasonality	Low
-0.077252624172858	-0.0766555998941409	500	0.04	7	No seasonality	Low
-0.0223126721719883	-0.0225289070266533	500	0.04	7	No seasonality	Low
-0.0801851353180952	-0.0817709789055215	500	0.04	7	No seasonality	Low
-0.0101924535895918	-0.00839132244387189	500	0.04	7	No seasonality	Low
-0.00386757317352332	-0.00197848016119224	5	0.04	18	No seasonality	Low
0.0302443574029956	0.0266671076535751	5	0.04	18	No seasonality	Low
-0.0287747312743597	-0.0277621587010154	5	0.04	18	No seasonality	Low
-0.0319188374704112	-0.0324601207088214	5	0.04	18	No seasonality	Low
-0.0366359874746778	-0.0364272277984674	5	0.04	18	No seasonality	Low
0.0196620002671611	0.0203596447655239	5	0.04	18	No seasonality	Low
-0.0374780964893506	-0.0356139086949788	5	0.04	18	No seasonality	Low
-0.0120165307652986	-0.0116553981567174	5	0.04	18	No seasonality	Low
0.0256396055964593	0.0181076063231531	5	0.04	18	No seasonality	Low
-0.0342466015423998	-0.0371266462533516	5	0.04	18	No seasonality	Low
-0.0193874658781293	-0.0172178966958563	5	0.04	18	No seasonality	Low
0.00914550197372764	0.00693354032606151	5	0.04	18	No seasonality	Low
-0.019075566280474	-0.0149957434305212	5	0.04	18	No seasonality	Low
-0.0429408666195442	-0.04254527009687	5	0.04	18	No seasonality	Low
0.0115055587797936	0.0109097702713391	5	0.04	18	No seasonality	Low
-0.0378832678905976	-0.0376427676553272	5	0.04	18	No seasonality	Low
-0.0443610692353282	-0.0462916515906568	5	0.04	18	No seasonality	Low
-0.0115595864133314	-0.00964471294954379	5	0.04	18	No seasonality	Low
-0.00503963192731162	-0.00757853427711778	5	0.04	18	No seasonality	Low
-0.00353529538571677	-0.0021781000273664	5	0.04	18	No seasonality	Low
0.00462546527558441	0.00454890864995004	5	0.04	18	No seasonality	Low
-0.00346417213115393	-0.000255470143686558	5	0.04	18	No seasonality	Low
0.0198820082053001	0.0151636003399611	5	0.04	18	No seasonality	Low
-0.0152037697321674	-0.0172084147483483	5	0.04	18	No seasonality	Low
-0.0289341111272475	-0.029121092710358	5	0.04	18	No seasonality	Low
-0.0248418632882087	-0.0238356542853375	5	0.04	18	No seasonality	Low
0.0190747664364393	0.0205926899932481	5	0.04	18	No seasonality	Low
0.000323191635850391	0.00159474433245415	5	0.04	18	No seasonality	Low
-0.037037113692522	-0.0372423730588484	5	0.04	18	No seasonality	Low
-0.0376027675105397	-0.0317874398716618	5	0.04	18	No seasonality	Low
-0.00972058414211439	-0.00768511549522222	10	0.04	18	No seasonality	Low
-0.0385929040651025	-0.0406242003675151	10	0.04	18	No seasonality	Low
-0.0546349063761548	-0.0546829078513406	10	0.04	18	No seasonality	Low
-0.0478461363394655	-0.0489168098465068	10	0.04	18	No seasonality	Low
-0.00849020311805567	-0.00527365393347801	10	0.04	18	No seasonality	Low
-0.0214290479415083	-0.0232518078558111	10	0.04	18	No seasonality	Low
-0.049472424272871	-0.0489976151448037	10	0.04	18	No seasonality	Low
0.00723007252108253	0.00517444166675263	10	0.04	18	No seasonality	Low
-0.031259343438351	-0.0284157538023962	10	0.04	18	No seasonality	Low
-0.0426478860546683	-0.0430825448695756	10	0.04	18	No seasonality	Low
0.0223142675083238	0.0203892408352613	10	0.04	18	No seasonality	Low
-0.0326319490442587	-0.033379582497326	10	0.04	18	No seasonality	Low
-0.0354017280582308	-0.0346906196193532	10	0.04	18	No seasonality	Low
0.0226730646506242	0.0202283683855365	10	0.04	18	No seasonality	Low
0.0212864680505931	0.0205313656176601	10	0.04	18	No seasonality	Low
-0.0505123767265127	-0.048142021295106	10	0.04	18	No seasonality	Low
-0.0213204447082728	-0.0212039523361806	10	0.04	18	No seasonality	Low
-0.0245849506271075	-0.0257892869853978	10	0.04	18	No seasonality	Low
-0.0392037483646085	-0.0338955402672755	10	0.04	18	No seasonality	Low
-0.0492049016985835	-0.0492150100298236	10	0.04	18	No seasonality	Low
-0.0184783108480627	-0.01987374213244	10	0.04	18	No seasonality	Low
0.00659069167419799	0.00849721671416952	10	0.04	18	No seasonality	Low
-0.00238925710797275	-0.00203317343183059	10	0.04	18	No seasonality	Low
-0.0344188628113801	-0.0356562264440472	10	0.04	18	No seasonality	Low
0.0210768796722972	0.0198273801693747	10	0.04	18	No seasonality	Low
0.0121991679945123	0.0116211563119007	10	0.04	18	No seasonality	Low
-0.0391685737234666	-0.0386645025492843	10	0.04	18	No seasonality	Low
-0.0493840848962842	-0.0464505492956782	10	0.04	18	No seasonality	Low
-0.0570328232396379	-0.0544463885415913	10	0.04	18	No seasonality	Low
-0.000347198562859738	0.000807946589643938	10	0.04	18	No seasonality	Low
0.0186924268209765	0.0202233474856463	500	0.04	18	No seasonality	Low
-0.0676275825242043	-0.0709345047785808	500	0.04	18	No seasonality	Low
-0.0551998410928	-0.0558670855754446	500	0.04	18	No seasonality	Low
-0.0148370255524598	-0.0134689791356399	500	0.04	18	No seasonality	Low
0.00168127414560236	-0.000496943810175194	500	0.04	18	No seasonality	Low
-0.0704459386579523	-0.0674309779698469	500	0.04	18	No seasonality	Low
0.0198763303210301	0.0224670143907946	500	0.04	18	No seasonality	Low
-0.0707159940709033	-0.0680618485333206	500	0.04	18	No seasonality	Low
0.0167825022084811	0.0198087423404766	500	0.04	18	No seasonality	Low
-0.0120088276787678	-0.0142245792012406	500	0.04	18	No seasonality	Low
-0.0259423660266165	-0.0246553303824839	500	0.04	18	No seasonality	Low
0.0138393982433419	0.0120139954392183	500	0.04	18	No seasonality	Low
-0.00674920638701802	-0.00685875812383096	500	0.04	18	No seasonality	Low
-0.00486553347106894	-0.00493412041644176	500	0.04	18	No seasonality	Low
-0.0703323447645215	-0.0704770981809869	500	0.04	18	No seasonality	Low
-0.0373958621295329	-0.0378062240468024	500	0.04	18	No seasonality	Low
-0.0543550457159327	-0.0526568756810799	500	0.04	18	No seasonality	Low
-0.0790924828098539	-0.0765614529765613	500	0.04	18	No seasonality	Low
0.00121435763487123	-0.00210572691375138	500	0.04	18	No seasonality	Low
-0.0807601300471032	-0.0763724697681298	500	0.04	18	No seasonality	Low
-0.0389874088666935	-0.0409866410770004	500	0.04	18	No seasonality	Low
-0.0525064950162518	-0.0521320596762248	500	0.04	18	No seasonality	Low
-0.00569491443644142	-0.00433044587899167	500	0.04	18	No seasonality	Low
-0.0052551974063713	-0.00546841304718394	500	0.04	18	No seasonality	Low
0.00830239647325582	0.00578910491769861	500	0.04	18	No seasonality	Low
-0.0572229748113419	-0.0578829906957131	500	0.04	18	No seasonality	Low
-0.0482176299544746	-0.0477937677023895	500	0.04	18	No seasonality	Low
-0.0492232290731043	-0.0520467563982792	500	0.04	18	No seasonality	Low
-0.0302487608932041	-0.0298256890892804	500	0.04	18	No seasonality	Low
-0.0152167516933013	-0.0141457983048919	500	0.04	18	No seasonality	Low
-0.00504618751373883	-0.00298478685630557	5	0.04	7	No seasonality	High
-0.0506171450507811	-0.0511780479007711	5	0.04	7	No seasonality	High
-0.0502291168355242	-0.0448415072878521	5	0.04	7	No seasonality	High
-0.00453964571533303	-0.00420134612492672	5	0.04	7	No seasonality	High
-0.0393387493834074	-0.040213688574705	5	0.04	7	No seasonality	High
-0.0602078229244524	-0.0560416195156211	5	0.04	7	No seasonality	High
-0.0402159755230855	-0.0403827426972964	5	0.04	7	No seasonality	High
-0.0162753221798131	-0.0165668926750564	5	0.04	7	No seasonality	High
-0.0442718478164172	-0.042438717466302	5	0.04	7	No seasonality	High
-0.0533751149708523	-0.0537175332332022	5	0.04	7	No seasonality	High
-0.0477348774060888	-0.0505208274439556	5	0.04	7	No seasonality	High
-0.0151265739321252	-0.0102112343798021	5	0.04	7	No seasonality	High
-0.00308146973583068	-0.00123351207546636	5	0.04	7	No seasonality	High
-0.0196286666253802	-0.0201005509320018	5	0.04	7	No seasonality	High
-0.00439776717967702	-0.00137322442883285	5	0.04	7	No seasonality	High
-0.0387850867418259	-0.0395862318288776	5	0.04	7	No seasonality	High
-0.0683143032047948	-0.0643531143552727	5	0.04	7	No seasonality	High
0.0120112984850919	0.0132941168251511	5	0.04	7	No seasonality	High
-0.061154740191884	-0.0573557691530206	5	0.04	7	No seasonality	High
-0.0735259906721932	-0.0743453613941135	5	0.04	7	No seasonality	High
-0.0527196384850792	-0.0539311707642068	5	0.04	7	No seasonality	High
-0.0497114746464578	-0.0482094519815768	5	0.04	7	No seasonality	High
-0.00674478412892785	-0.00525399287893757	5	0.04	7	No seasonality	High
-0.0339278491608993	-0.0419418592704822	5	0.04	7	No seasonality	High
-0.0238814686665916	-0.0182667861694214	5	0.04	7	No seasonality	High
-0.00889359187943358	-0.00950082822003678	5	0.04	7	No seasonality	High
-0.0634078692540124	-0.0659363662523265	5	0.04	7	No seasonality	High
0.0185080084575594	0.020638010796037	5	0.04	7	No seasonality	High
-0.0129631789165584	-0.0122617824700923	5	0.04	7	No seasonality	High
-0.00313478011103389	-0.00236969518317265	5	0.04	7	No seasonality	High
6.3979669743304e-05	0.00584455546302554	10	0.04	7	No seasonality	High
-0.00874487572788569	-0.00845684810028238	10	0.04	7	No seasonality	High
-0.0810004852138537	-0.0790658281204629	10	0.04	7	No seasonality	High
-0.0581627336599631	-0.0546530180628656	10	0.04	7	No seasonality	High
-0.024022116462061	-0.0287968013710533	10	0.04	7	No seasonality	High
-0.0247982449960356	-0.0264458516275425	10	0.04	7	No seasonality	High
-0.0539866632279015	-0.0547718019930038	10	0.04	7	No seasonality	High
-0.034911537758175	-0.0314591723484704	10	0.04	7	No seasonality	High
-0.077721010287368	-0.0750788152672664	10	0.04	7	No seasonality	High
-0.0715347810740968	-0.0701408159524593	10	0.04	7	No seasonality	High
-0.0534141543609693	-0.0495471759021301	10	0.04	7	No seasonality	High
-0.073595448490218	-0.0714355018963759	10	0.04	7	No seasonality	High
-0.0536644606354085	-0.0509523372862843	10	0.04	7	No seasonality	High
-0.0602092510276949	-0.0581495830517278	10	0.04	7	No seasonality	High
-0.016741806814428	-0.0179937351345273	10	0.04	7	No seasonality	High
-0.0543921369979952	-0.0588043532611935	10	0.04	7	No seasonality	High
-0.0496274509702492	-0.0495909996605274	10	0.04	7	No seasonality	High
0.0136575959986388	0.00634431670487556	10	0.04	7	No seasonality	High
0.0180300164493248	0.0141191509302183	10	0.04	7	No seasonality	High
0.00359876458745759	0.00197267692602001	10	0.04	7	No seasonality	High
-0.0530349889092563	-0.0495871856634041	10	0.04	7	No seasonality	High
-0.0297602730429912	-0.0283661897416771	10	0.04	7	No seasonality	High
-0.0228328162314846	-0.0237193103637948	10	0.04	7	No seasonality	High
-0.0121911986787844	-0.015615572668554	10	0.04	7	No seasonality	High
-0.0704858186197521	-0.0638741323386288	10	0.04	7	No seasonality	High
-0.0329436266985713	-0.0299281112851229	10	0.04	7	No seasonality	High
0.0135613695091807	0.01329265895713	10	0.04	7	No seasonality	High
-0.0171056448685954	-0.0148438027002298	10	0.04	7	No seasonality	High
-0.0666795631122001	-0.0693669081346616	10	0.04	7	No seasonality	High
-0.00482249703371687	-0.0117080971531349	10	0.04	7	No seasonality	High
-0.0361497667614482	-0.0387288017328971	500	0.04	7	No seasonality	High
-0.101065093197188	-0.0985252043582566	500	0.04	7	No seasonality	High
-0.0988352017870321	-0.0991314023790708	500	0.04	7	No seasonality	High
-0.0730004100088516	-0.0737795535687084	500	0.04	7	No seasonality	High
-0.0998450105952364	-0.0953991905824918	500	0.04	7	No seasonality	High
-0.0950080388902951	-0.0950562802756697	500	0.04	7	No seasonality	High
0.000426695824771712	-0.00664204784300668	500	0.04	7	No seasonality	High
0.0109388252149936	0.00785704198942924	500	0.04	7	No seasonality	High
-0.0450187975316047	-0.0446539456975094	500	0.04	7	No seasonality	High
-0.00253759083996398	-0.00415336008853476	500	0.04	7	No seasonality	High
-0.0645637714108948	-0.0659365663669428	500	0.04	7	No seasonality	High
-0.066867908729291	-0.0645079628609753	500	0.04	7	No seasonality	High
-0.0202998394488375	-0.0195103245871242	500	0.04	7	No seasonality	High
-0.0698427768491251	-0.0720992383838225	500	0.04	7	No seasonality	High
-0.0266060240864522	-0.0238201407399459	500	0.04	7	No seasonality	High
-0.0754909205947591	-0.0757494556709917	500	0.04	7	No seasonality	High
-0.0465518275923286	-0.0476402746860443	500	0.04	7	No seasonality	High
-0.0558034995782094	-0.0566478459788226	500	0.04	7	No seasonality	High
0.000656729921414231	-0.00985320773467577	500	0.04	7	No seasonality	High
-0.0254351494231219	-0.0235635325742311	500	0.04	7	No seasonality	High
-0.0270228338464225	-0.025680116902165	500	0.04	7	No seasonality	High
-0.0194541744136428	-0.0218512378330408	500	0.04	7	No seasonality	High
-0.0223627837515805	-0.025206291488046	500	0.04	7	No seasonality	High
-0.0866795451494571	-0.0828286994386043	500	0.04	7	No seasonality	High
0.00422539698161721	0.00457977568170733	500	0.04	7	No seasonality	High
-0.00550574309568823	-0.00930056887480069	500	0.04	7	No seasonality	High
-0.0339013823320851	-0.0319437679130334	500	0.04	7	No seasonality	High
-0.0268838027052602	-0.0277015950311519	500	0.04	7	No seasonality	High
-0.0161557885581549	-0.0160496618010485	500	0.04	7	No seasonality	High
-0.0693429603324942	-0.072734725542124	500	0.04	7	No seasonality	High
0.0208993046892587	0.022866154984021	5	0.04	18	No seasonality	High
0.014307355789324	0.0189146495504648	5	0.04	18	No seasonality	High
-0.04234876370964	-0.0403186371167011	5	0.04	18	No seasonality	High
0.0240104926927601	0.0247688638166606	5	0.04	18	No seasonality	High
0.0175749760893468	0.0203904997707858	5	0.04	18	No seasonality	High
-0.0209592587879683	-0.0197199815272766	5	0.04	18	No seasonality	High
0.0207889489127127	0.0173863277231574	5	0.04	18	No seasonality	High
0.00676392697452928	0.00585513714855561	5	0.04	18	No seasonality	High
0.0080561581710001	0.00805877672469313	5	0.04	18	No seasonality	High
-0.0169322071403774	-0.014089613712991	5	0.04	18	No seasonality	High
0.0161938189033311	0.0171306346414346	5	0.04	18	No seasonality	High
-0.0210937052605532	-0.0210685518159819	5	0.04	18	No seasonality	High
0.0124390640561181	0.0102981446241731	5	0.04	18	No seasonality	High
0.0245320251193882	0.0246142469215263	5	0.04	18	No seasonality	High
0.0267128686824509	0.0234561258516986	5	0.04	18	No seasonality	High
-0.0350905765067001	-0.035737068492273	5	0.04	18	No seasonality	High
0.00162401356172215	0.00163850965562009	5	0.04	18	No seasonality	High
-0.00671888747022473	-0.00994071051146605	5	0.04	18	No seasonality	High
0.00511965832673674	0.00496842889842134	5	0.04	18	No seasonality	High
0.0267251542159348	0.0223257877233079	5	0.04	18	No seasonality	High
0.0155393459814007	0.0180024269484812	5	0.04	18	No seasonality	High
0.0270444229280166	0.0246630693443737	5	0.04	18	No seasonality	High
-0.00439310796338065	-0.00590689923070963	5	0.04	18	No seasonality	High
-0.0218851937147525	-0.0227827148442181	5	0.04	18	No seasonality	High
0.00390888245986221	0.00296904075960469	5	0.04	18	No seasonality	High
0.0199963881581916	0.0213032701520837	5	0.04	18	No seasonality	High
-0.0122204088881307	-0.00991756307164945	5	0.04	18	No seasonality	High
-0.00149545905473742	-0.00316391000966245	5	0.04	18	No seasonality	High
-0.0412074844690732	-0.0417456168237439	5	0.04	18	No seasonality	High
0.00577404862572178	0.00425706504106019	5	0.04	18	No seasonality	High
0.0196146089842142	0.0194217918900336	10	0.04	18	No seasonality	High
-0.0616391104084389	-0.0570754670449215	10	0.04	18	No seasonality	High
0.0224701871334208	0.021163530851136	10	0.04	18	No seasonality	High
-0.050230489539955	-0.0520384279261303	10	0.04	18	No seasonality	High
-0.0387155313689614	-0.0373591725304669	10	0.04	18	No seasonality	High
-0.0585863944884436	-0.0557846167697687	10	0.04	18	No seasonality	High
-0.0073363264341658	-0.00758769863286582	10	0.04	18	No seasonality	High
-0.0523331972060117	-0.0531576081840169	10	0.04	18	No seasonality	High
0.014105720292944	0.0128008703751979	10	0.04	18	No seasonality	High
-0.0480186507759073	-0.0488691002678199	10	0.04	18	No seasonality	High
0.00542624064574669	0.00479069895307762	10	0.04	18	No seasonality	High
-0.0267861427403398	-0.0272295302383037	10	0.04	18	No seasonality	High
-0.0583969191300153	-0.0527174144616373	10	0.04	18	No seasonality	High
-0.0315448609032228	-0.0305119335090138	10	0.04	18	No seasonality	High
-0.0223099434116551	-0.024241259196297	10	0.04	18	No seasonality	High
-0.0107133385293752	-0.00889396833178158	10	0.04	18	No seasonality	High
-0.0201794240659414	-0.0224423073402128	10	0.04	18	No seasonality	High
-0.025130174356699	-0.0251311833459356	10	0.04	18	No seasonality	High
-0.0301121799367312	-0.0291371923403877	10	0.04	18	No seasonality	High
-0.0464670556953741	-0.0482282093733558	10	0.04	18	No seasonality	High
-0.0205056851155879	-0.0178241795347222	10	0.04	18	No seasonality	High
-0.0040603144490809	-0.00241831602538183	10	0.04	18	No seasonality	High
-0.0150131758846169	-0.0136380552316235	10	0.04	18	No seasonality	High
-0.0375457041647442	-0.039441838422183	10	0.04	18	No seasonality	High
-0.0112420462952065	-0.0118338627369762	10	0.04	18	No seasonality	High
0.0156702170592978	0.0148486375241919	10	0.04	18	No seasonality	High
-0.00287205488383001	-0.00529306085787661	10	0.04	18	No seasonality	High
-0.0159131987217188	-0.0153530198524101	10	0.04	18	No seasonality	High
0.00766062779496246	0.0070786151184873	10	0.04	18	No seasonality	High
-0.0497324820665585	-0.0452637890857907	10	0.04	18	No seasonality	High
-0.077978376973684	-0.0776440844829884	500	0.04	18	No seasonality	High
-0.0668313422300932	-0.0668619177730724	500	0.04	18	No seasonality	High
-0.0130546986774798	-0.01368795805096	500	0.04	18	No seasonality	High
-0.0388817162277509	-0.0392526786683694	500	0.04	18	No seasonality	High
-0.0101565273808903	-0.0103444101815979	500	0.04	18	No seasonality	High
-0.0652787256317152	-0.0656401450461337	500	0.04	18	No seasonality	High
0.0157593486671787	0.0124741786128597	500	0.04	18	No seasonality	High
-0.0137440593544449	-0.0153422738682481	500	0.04	18	No seasonality	High
-0.0217026316262035	-0.0216973442139764	500	0.04	18	No seasonality	High
-0.0375541517044981	-0.0387549173674674	500	0.04	18	No seasonality	High
0.0158261595318072	0.016148803315351	500	0.04	18	No seasonality	High
-0.0571664625939898	-0.0559523172996961	500	0.04	18	No seasonality	High
-0.0452062285955163	-0.0417747995327	500	0.04	18	No seasonality	High
-0.0323745831922558	-0.0354754317896396	500	0.04	18	No seasonality	High
-0.0504231135834855	-0.0501789798295848	500	0.04	18	No seasonality	High
0.0214661362880683	0.021230480260214	500	0.04	18	No seasonality	High
-0.0358732590917366	-0.0368279984681081	500	0.04	18	No seasonality	High
0.00379333939710699	0.00373269021438889	500	0.04	18	No seasonality	High
-0.0354139014491981	-0.0362238861558442	500	0.04	18	No seasonality	High
-0.0570633063872176	-0.057674138269818	500	0.04	18	No seasonality	High
-0.0353618793219106	-0.0355127586197498	500	0.04	18	No seasonality	High
-0.06325921553436	-0.0648338793000154	500	0.04	18	No seasonality	High
0.0102613586025962	0.0105029997049064	500	0.04	18	No seasonality	High
-0.0291472164083617	-0.0255385230751114	500	0.04	18	No seasonality	High
-0.012900457732728	-0.0135542509605596	500	0.04	18	No seasonality	High
-0.00268501702746149	-0.00375611421697754	500	0.04	18	No seasonality	High
-0.0164379447352403	-0.0175733489722917	500	0.04	18	No seasonality	High
-0.0543428205325762	-0.0545565882185345	500	0.04	18	No seasonality	High
-0.0103572660827856	-0.0115378584541654	500	0.04	18	No seasonality	High
-0.0276201008488806	-0.0283976917216158	500	0.04	18	No seasonality	High
-0.0245822786849444	-0.0230509247609816	5	0.04	7	Seasonality	Low
0.00219863616023843	0.00418248573800434	5	0.04	7	Seasonality	Low
-0.0415247001902883	-0.0368341984004466	5	0.04	7	Seasonality	Low
-0.0103996011337248	-0.0129301680672763	5	0.04	7	Seasonality	Low
0.00683518692574032	-0.00246228031902787	5	0.04	7	Seasonality	Low
-0.0212380058061334	-0.0216138579448451	5	0.04	7	Seasonality	Low
-0.0283686105107713	-0.0241302866864989	5	0.04	7	Seasonality	Low
-0.00159418810949108	0.00180836012658914	5	0.04	7	Seasonality	Low
-0.0316067053806925	-0.0279046360438393	5	0.04	7	Seasonality	Low
0.0210425352432058	0.015932318128005	5	0.04	7	Seasonality	Low
-0.0180547396496503	-0.0168181805852581	5	0.04	7	Seasonality	Low
-0.00803319754201175	-0.0108685154636068	5	0.04	7	Seasonality	Low
0.00606045415714701	0.0131058508899736	5	0.04	7	Seasonality	Low
0.0123667204772407	0.0157305502518736	5	0.04	7	Seasonality	Low
-0.02894909004891	-0.0297492790295551	5	0.04	7	Seasonality	Low
-0.0131794253222485	-0.0179186905411367	5	0.04	7	Seasonality	Low
-0.0238303749291517	-0.0158402685068804	5	0.04	7	Seasonality	Low
-0.0268385886153258	-0.0194795972076111	5	0.04	7	Seasonality	Low
-0.0204747319230303	-0.0203716235905834	5	0.04	7	Seasonality	Low
0.00909892144829848	0.0128481034872504	5	0.04	7	Seasonality	Low
-0.0249474732940564	-0.0223189266417408	5	0.04	7	Seasonality	Low
0.0277317117499106	0.0252403785516189	5	0.04	7	Seasonality	Low
-0.0270909051752408	-0.0317469632837071	5	0.04	7	Seasonality	Low
0.00804169297806957	0.00764153553129501	5	0.04	7	Seasonality	Low
-0.0406046793046845	-0.0346441995459765	5	0.04	7	Seasonality	Low
-0.01378769641723	-0.0176255093995383	5	0.04	7	Seasonality	Low
-0.0397310023016991	-0.0438321938032505	5	0.04	7	Seasonality	Low
-0.0319005734809559	-0.0319916416658564	5	0.04	7	Seasonality	Low
0.0200919096011519	0.0147889112146538	5	0.04	7	Seasonality	Low
-0.0259735266065449	-0.0243917981786355	5	0.04	7	Seasonality	Low
-0.0305023986994193	-0.0258310679128958	5	0.04	7	Seasonality	Low
-0.00525732718955083	-0.00934772805684487	5	0.04	7	Seasonality	Low
-0.0148433143079016	-0.00877097846473001	5	0.04	7	Seasonality	Low
-0.0236669570379206	-0.0332769457288238	5	0.04	7	Seasonality	Low
-0.0323442678329294	-0.0364436074597056	5	0.04	7	Seasonality	Low
-0.0270066215191902	-0.0315158806732876	5	0.04	7	Seasonality	Low
-0.0269560246980922	-0.0289542226880515	5	0.04	7	Seasonality	Low
-0.0373433536411943	-0.0396709012895183	5	0.04	7	Seasonality	Low
-0.0273132234475039	-0.0284975964496214	5	0.04	7	Seasonality	Low
-0.0220186557730137	-0.0239904032799556	5	0.04	7	Seasonality	Low
-0.00590696484779203	-0.00316186602409893	5	0.04	7	Seasonality	Low
-0.0168609717503492	-0.0208102079643513	5	0.04	7	Seasonality	Low
-0.03378026178667	-0.0377887496962766	5	0.04	7	Seasonality	Low
-0.00570441362951023	-0.0112755778198229	5	0.04	7	Seasonality	Low
-0.00790705634445709	-0.0101669452844356	5	0.04	7	Seasonality	Low
-0.0024102066707295	-0.00432422952259658	5	0.04	7	Seasonality	Low
-0.000430186365313102	-0.00121059364030951	5	0.04	7	Seasonality	Low
-0.00364651565005446	-0.0104278238623158	5	0.04	7	Seasonality	Low
-0.0242038921478176	-0.0221347504357915	5	0.04	7	Seasonality	Low
-0.00116399099478199	-0.00971174525684746	5	0.04	7	Seasonality	Low
-0.0188571433006545	-0.0181177127607641	5	0.04	7	Seasonality	Low
-0.0259649970950187	-0.023542970681428	5	0.04	7	Seasonality	Low
0.00631966804092586	0.00527211541303093	5	0.04	7	Seasonality	Low
-0.0282741088022	-0.0277180437594098	5	0.04	7	Seasonality	Low
-0.0238595221345872	-0.0207094935814659	5	0.04	7	Seasonality	Low
-0.0295184330795565	-0.0298128530409291	5	0.04	7	Seasonality	Low
-0.0157056712860281	-0.0163106738823734	5	0.04	7	Seasonality	Low
-0.00650770766662417	-0.010986551238987	5	0.04	7	Seasonality	Low
-0.0151081275382168	-0.018594345526457	5	0.04	7	Seasonality	Low
-0.0204181770812085	-0.0187202398712927	5	0.04	7	Seasonality	Low
-0.0159944720612409	-0.0192743445514161	5	0.04	7	Seasonality	Low
-0.0136716429415495	-0.0146065565073124	5	0.04	7	Seasonality	Low
-0.0227990720077795	-0.0188937610908257	5	0.04	7	Seasonality	Low
-0.00381790359284041	-0.00803837508342018	5	0.04	7	Seasonality	Low
-0.00810837268009012	-0.0106538320969648	5	0.04	7	Seasonality	Low
-0.0178664351563056	-0.0159768963532097	5	0.04	7	Seasonality	Low
-0.00184421266440881	-0.00862389619524649	5	0.04	7	Seasonality	Low
-0.0249616942959777	-0.0225735062061921	5	0.04	7	Seasonality	Low
-0.00275383429071176	-0.00219867620709012	5	0.04	7	Seasonality	Low
-0.0227134618479206	-0.0247759638137595	5	0.04	7	Seasonality	Low
-0.0486266922498101	-0.0478315510043908	10	0.04	7	Seasonality	Low
-0.0078812619258401	-0.00747081534735302	10	0.04	7	Seasonality	Low
0.0239299965074043	0.0224911006331679	10	0.04	7	Seasonality	Low
0.0055935327057037	0.0075362830593734	10	0.04	7	Seasonality	Low
0.014114822264635	0.00623142976490511	10	0.04	7	Seasonality	Low
-0.0299975702758728	-0.0322153519252357	10	0.04	7	Seasonality	Low
-0.0395367570806868	-0.0443682395112586	10	0.04	7	Seasonality	Low
0.00623423523083027	0.00668823558629586	10	0.04	7	Seasonality	Low
-0.0176093876453817	-0.0240285797400575	10	0.04	7	Seasonality	Low
-0.034523166322896	-0.0367847652949864	10	0.04	7	Seasonality	Low
0.00581718518404536	0.00312242789800315	10	0.04	7	Seasonality	Low
0.00717268708901561	0.0126649867249784	10	0.04	7	Seasonality	Low
-0.0302086224683398	-0.0343365001407279	10	0.04	7	Seasonality	Low
0.0174311793907432	0.0163035202553735	10	0.04	7	Seasonality	Low
-0.0175971535723726	-0.0171032483593272	10	0.04	7	Seasonality	Low
-0.0399977763253811	-0.0516767089775182	10	0.04	7	Seasonality	Low
-0.0426146679362203	-0.0410322427778689	10	0.04	7	Seasonality	Low
-0.000370457848169148	-0.00459896737671091	10	0.04	7	Seasonality	Low
-0.04121592329513	-0.039630333969587	10	0.04	7	Seasonality	Low
-0.0133777026764202	-0.00834761648845117	10	0.04	7	Seasonality	Low
-0.0133074692546837	-0.0167117866726906	10	0.04	7	Seasonality	Low
-0.0102343852904612	-0.0184823706778181	10	0.04	7	Seasonality	Low
-0.0309627488092226	-0.040027417986577	10	0.04	7	Seasonality	Low
-0.00173482352043666	-0.00251096185599179	10	0.04	7	Seasonality	Low
0.00906226511865976	0.0103245019657563	10	0.04	7	Seasonality	Low
-0.0348417284388354	-0.0380830141968522	10	0.04	7	Seasonality	Low
0.0221362031227941	0.0191084007424359	10	0.04	7	Seasonality	Low
-0.0060322387351723	-0.00440602371104562	10	0.04	7	Seasonality	Low
-0.0357350620006834	-0.0430288804213511	10	0.04	7	Seasonality	Low
0.0157472361939115	0.015099088082459	500	0.04	7	Seasonality	Low
-0.0637228632559245	-0.0659953907157534	500	0.04	7	Seasonality	Low
-0.0564737074090577	-0.0592220936513957	500	0.04	7	Seasonality	Low
-0.00446552660221492	-0.00368181513803537	500	0.04	7	Seasonality	Low
-0.0128393013267077	-0.00753217305524295	500	0.04	7	Seasonality	Low
0.0137644026610706	0.0144659575572348	500	0.04	7	Seasonality	Low
0.00537751159959906	0.00682675796019044	500	0.04	7	Seasonality	Low
-0.0701168339147935	-0.068356722788921	500	0.04	7	Seasonality	Low
-0.0582428100016319	-0.0555962685947485	500	0.04	7	Seasonality	Low
-0.0446569330798372	-0.0449572682224437	500	0.04	7	Seasonality	Low
-0.0161769002606222	-0.0192763238358877	500	0.04	7	Seasonality	Low
-0.00466794118037031	-0.00377802335199973	500	0.04	7	Seasonality	Low
-0.0502844148695607	-0.0522385078041897	500	0.04	7	Seasonality	Low
-0.0181251195978782	-0.0159027855677373	500	0.04	7	Seasonality	Low
-0.0902544219678584	-0.0869254748646486	500	0.04	7	Seasonality	Low
-0.0882115705463252	-0.0873335467986901	500	0.04	7	Seasonality	Low
-0.0602852515388971	-0.0595997278780072	500	0.04	7	Seasonality	Low
-0.0564858823630006	-0.0571970597960886	500	0.04	7	Seasonality	Low
-0.0142133254396527	-0.0143233465700182	500	0.04	7	Seasonality	Low
-0.0412864910236444	-0.0381428467211119	500	0.04	7	Seasonality	Low
0.017498767599823	0.0178735717685909	500	0.04	7	Seasonality	Low
-0.0228503948731814	-0.0238828516431471	500	0.04	7	Seasonality	Low
-0.0245439287003357	-0.0232647532529172	500	0.04	7	Seasonality	Low
-0.0183412790341592	-0.0206084332004076	500	0.04	7	Seasonality	Low
-0.0209285265823189	-0.0225473289957279	500	0.04	7	Seasonality	Low
-0.0867464539664086	-0.085465501143841	500	0.04	7	Seasonality	Low
-0.0367830617728611	-0.0367858908847189	500	0.04	7	Seasonality	Low
-0.0829173289797061	-0.0840603018446398	500	0.04	7	Seasonality	Low
-0.0244566670151686	-0.0277387664934014	500	0.04	7	Seasonality	Low
-0.0606722228817573	-0.0628550032479828	500	0.04	7	Seasonality	Low
0.010059056599727	0.00158263156713175	5	0.04	18	Seasonality	Low
-0.0332397476345212	-0.0279139311569001	5	0.04	18	Seasonality	Low
-0.00748309891919459	0.00313305419043207	5	0.04	18	Seasonality	Low
-0.013675229089115	-0.0113140887341943	5	0.04	18	Seasonality	Low
-0.0290771927988185	-0.0236634760280936	5	0.04	18	Seasonality	Low
0.026107402623816	0.0245367310813224	5	0.04	18	Seasonality	Low
-0.00223165215199814	-0.00251042453986871	5	0.04	18	Seasonality	Low
-0.020986823598031	-0.0241982543519733	5	0.04	18	Seasonality	Low
-0.0156298046652509	-0.0257476934326338	5	0.04	18	Seasonality	Low
-0.00500323968317731	-0.00813047293338797	5	0.04	18	Seasonality	Low
-0.0299676029206299	-0.0278925573087881	5	0.04	18	Seasonality	Low
0.0165726380404153	0.0196430979828281	5	0.04	18	Seasonality	Low
-0.00938659511789943	-0.0120563493163887	5	0.04	18	Seasonality	Low
-0.0262662239211371	-0.0276239741587196	5	0.04	18	Seasonality	Low
0.0212092270724101	0.0171648663235307	5	0.04	18	Seasonality	Low
0.0330181151457928	0.0297179198244692	5	0.04	18	Seasonality	Low
0.00986765280875233	0.0140612688441994	5	0.04	18	Seasonality	Low
-0.0269169561894299	-0.0220531888603224	5	0.04	18	Seasonality	Low
-0.0186654589862491	-0.0221832391688851	5	0.04	18	Seasonality	Low
0.0175571944189278	0.0232021749558735	5	0.04	18	Seasonality	Low
0.00891589264515682	0.0075886943808177	5	0.04	18	Seasonality	Low
0.00931643596593088	0.00415798794052039	5	0.04	18	Seasonality	Low
-0.0162083854593898	-0.0183291730735022	5	0.04	18	Seasonality	Low
0.0215578893424824	0.0220915920030347	5	0.04	18	Seasonality	Low
0.0084039837699853	0.0108330556185717	5	0.04	18	Seasonality	Low
0.0221766939013297	0.0233666376870748	5	0.04	18	Seasonality	Low
-0.0267396837350209	-0.0256217870076009	5	0.04	18	Seasonality	Low
0.0151346854909531	0.01001650574715	5	0.04	18	Seasonality	Low
0.00633857287721414	0.00820508931109829	5	0.04	18	Seasonality	Low
0.00727574859740114	0.00497140255506052	5	0.04	18	Seasonality	Low
-0.0247350312439173	-0.0332117688235453	5	0.04	18	Seasonality	Low
-0.0302135577766404	-0.0251133823606178	5	0.04	18	Seasonality	Low
-0.00695148934139428	-0.008385188969395	5	0.04	18	Seasonality	Low
-0.00992070764802281	-0.00764412184822614	5	0.04	18	Seasonality	Low
-0.0282839049736011	-0.0253639307686031	5	0.04	18	Seasonality	Low
-0.00469258281821046	-0.00316442589609144	5	0.04	18	Seasonality	Low
-0.00312164939843538	-0.00833315379791429	5	0.04	18	Seasonality	Low
-0.0340479196933423	-0.0279668383432642	5	0.04	18	Seasonality	Low
-0.0181268462812545	-0.0185414718880322	5	0.04	18	Seasonality	Low
-0.0170262977263134	-0.014534811451466	5	0.04	18	Seasonality	Low
-0.0304814019957414	-0.026423719494821	5	0.04	18	Seasonality	Low
-0.0299580456942733	-0.0280251163184971	5	0.04	18	Seasonality	Low
-0.0145535859979766	-0.0173863555099674	5	0.04	18	Seasonality	Low
0.031273202795033	0.0327038662800162	5	0.04	18	Seasonality	Low
0.0244966366230922	0.0219556182424343	5	0.04	18	Seasonality	Low
0.0238519596158762	0.0232399741408554	5	0.04	18	Seasonality	Low
0.0368808952274394	0.0338125322437274	5	0.04	18	Seasonality	Low
0.0100057857859754	0.015517326685868	5	0.04	18	Seasonality	Low
0.0350126448757213	0.0313423691233044	5	0.04	18	Seasonality	Low
0.0105434345327732	0.0151677521789313	5	0.04	18	Seasonality	Low
0.00317955435024854	0.00360547983459757	10	0.04	18	Seasonality	Low
-0.00396110665439163	0.000817330187683029	10	0.04	18	Seasonality	Low
0.00553000005474563	0.00543173029969541	10	0.04	18	Seasonality	Low
0.0246290360122662	0.0292206795647468	10	0.04	18	Seasonality	Low
0.0171782256385796	0.0148369944206485	10	0.04	18	Seasonality	Low
-0.0166882048397414	-0.0196073274518767	10	0.04	18	Seasonality	Low
-0.0158252616488901	-0.0183720950903505	10	0.04	18	Seasonality	Low
-0.0286744821824936	-0.0309548748100444	10	0.04	18	Seasonality	Low
-0.0151404110397642	-0.0114855397560943	10	0.04	18	Seasonality	Low
0.0133363373463289	0.0171055810328389	10	0.04	18	Seasonality	Low
-0.0408618402051208	-0.0363121313926211	10	0.04	18	Seasonality	Low
-0.0437916208216953	-0.0422108954629462	10	0.04	18	Seasonality	Low
-0.0182890686483134	-0.0126860262154514	10	0.04	18	Seasonality	Low
0.0215318031077035	0.0188726706847041	10	0.04	18	Seasonality	Low
-0.0290032271296564	-0.0253634436760114	10	0.04	18	Seasonality	Low
-0.0111213195934338	-0.0121489290772452	10	0.04	18	Seasonality	Low
0.0182548460977894	0.0194226901811065	10	0.04	18	Seasonality	Low
-0.0153038021682486	-0.0131556344150307	10	0.04	18	Seasonality	Low
0.00265435989748923	0.00900120356153101	10	0.04	18	Seasonality	Low
0.00462865148776821	-0.00294110783732654	10	0.04	18	Seasonality	Low
-0.0342348974890972	-0.0347695292667514	10	0.04	18	Seasonality	Low
-0.000558367475095497	-0.00206221564134194	10	0.04	18	Seasonality	Low
-0.0202077110670263	-0.023514895376365	10	0.04	18	Seasonality	Low
0.0118796205330353	0.0192934101184747	10	0.04	18	Seasonality	Low
0.00076008812117212	-7.72621837756751e-05	10	0.04	18	Seasonality	Low
-0.0124578004383566	-0.0116933748460631	10	0.04	18	Seasonality	Low
-0.0179897587871098	-0.0223857574921649	10	0.04	18	Seasonality	Low
0.00732980918462657	0.00651365907533923	10	0.04	18	Seasonality	Low
-0.0107348075547175	-0.00603855593492075	10	0.04	18	Seasonality	Low
-0.038014802885855	-0.03937369753461	10	0.04	18	Seasonality	Low
-0.073878769556436	-0.0670733942557714	500	0.04	18	Seasonality	Low
-0.0480720775490466	-0.0488360028330836	500	0.04	18	Seasonality	Low
-0.0527483029727922	-0.0544051133987583	500	0.04	18	Seasonality	Low
-0.0671924302881606	-0.0674760526390093	500	0.04	18	Seasonality	Low
-0.0340074034050122	-0.0355086012575704	500	0.04	18	Seasonality	Low
-0.0599895658269996	-0.0605050230885468	500	0.04	18	Seasonality	Low
0.0137710902655931	0.0126533529045407	500	0.04	18	Seasonality	Low
-0.0278559976496718	-0.0283502848460687	500	0.04	18	Seasonality	Low
-0.0186115390008262	-0.0138029624859412	500	0.04	18	Seasonality	Low
0.0153758599549223	0.0160459950947367	500	0.04	18	Seasonality	Low
-0.0675994894368953	-0.0620360296529538	500	0.04	18	Seasonality	Low
-0.0372618626440888	-0.0365732481138012	500	0.04	18	Seasonality	Low
0.0244267377640548	0.0233893791865415	500	0.04	18	Seasonality	Low
-0.0425901546203882	-0.041839545828606	500	0.04	18	Seasonality	Low
-0.0399853876411586	-0.0401207454877651	500	0.04	18	Seasonality	Low
-0.0479841007292055	-0.0480313924847126	500	0.04	18	Seasonality	Low
-0.0700226602424258	-0.0684992343388477	500	0.04	18	Seasonality	Low
-0.0314645736292385	-0.0318220145578871	500	0.04	18	Seasonality	Low
-0.0229346207244511	-0.0208437356696183	500	0.04	18	Seasonality	Low
0.00765299364359195	0.0113385508847803	500	0.04	18	Seasonality	Low
-0.0400113962456705	-0.0381469951124987	500	0.04	18	Seasonality	Low
-0.049252244101787	-0.0494217302119619	500	0.04	18	Seasonality	Low
-0.00468269830123054	-0.00310926558699956	500	0.04	18	Seasonality	Low
-0.0161841636836263	-0.0160852242487889	500	0.04	18	Seasonality	Low
-0.0435193960796108	-0.0443206286537497	500	0.04	18	Seasonality	Low
-0.0102540385711948	-0.010242894657557	500	0.04	18	Seasonality	Low
-0.0282828981325799	-0.0292257323189552	500	0.04	18	Seasonality	Low
0.00356785096906131	0.00429019270724448	500	0.04	18	Seasonality	Low
-0.06227199256842	-0.0563188831614751	500	0.04	18	Seasonality	Low
-0.0152393267849543	-0.0136534083103045	500	0.04	18	Seasonality	Low
-0.0593946243214031	-0.0579765155352789	5	0.04	7	Seasonality	High
-0.0420104011859389	-0.0362603655675169	5	0.04	7	Seasonality	High
-0.0480774274409332	-0.0398462360010805	5	0.04	7	Seasonality	High
-0.00707238320438542	-0.00694903076255123	5	0.04	7	Seasonality	High
-0.0269651133061372	-0.0319907279728069	5	0.04	7	Seasonality	High
-0.0167834997779686	-0.0110603135309335	5	0.04	7	Seasonality	High
-0.00783433298930408	-0.00861332242371267	5	0.04	7	Seasonality	High
-0.0220696010448874	-0.0195911952280673	5	0.04	7	Seasonality	High
-0.041451963831311	-0.0254031870892656	5	0.04	7	Seasonality	High
-0.0472239618600474	-0.0542460178083505	5	0.04	7	Seasonality	High
-0.0480439861204908	-0.0404069294375486	5	0.04	7	Seasonality	High
-0.0322177504098534	-0.0380831588242197	5	0.04	7	Seasonality	High
-0.0156947618460064	-0.0138030026747872	5	0.04	7	Seasonality	High
-0.0413987412731749	-0.035472511716247	5	0.04	7	Seasonality	High
-0.00419634970553578	-0.00445785776735512	5	0.04	7	Seasonality	High
-0.0630759688655833	-0.060166231822955	5	0.04	7	Seasonality	High
-0.0509802991459535	-0.0490786733103632	5	0.04	7	Seasonality	High
-0.00539550201673441	-0.00461908600386165	5	0.04	7	Seasonality	High
0.00405891272558872	0.00163746090390697	5	0.04	7	Seasonality	High
-0.0408909889576718	-0.0398812763044561	5	0.04	7	Seasonality	High
-0.0130468792060694	-0.0132830165361697	5	0.04	7	Seasonality	High
-0.0228585378497499	-0.023376701919523	5	0.04	7	Seasonality	High
-0.0269041439654678	-0.020854941514937	5	0.04	7	Seasonality	High
-0.000804568559610556	-0.00603075970339451	5	0.04	7	Seasonality	High
-0.0118203990295173	-0.0145251771977566	5	0.04	7	Seasonality	High
-0.0341238471921203	-0.0266125667339811	5	0.04	7	Seasonality	High
0.0306368439216543	0.0128803806960202	5	0.04	7	Seasonality	High
-0.00326291420243595	-0.00929049533227215	5	0.04	7	Seasonality	High
-0.0611588165530706	-0.0646333044062003	5	0.04	7	Seasonality	High
-0.0612099307006857	-0.0543065847627039	5	0.04	7	Seasonality	High
0.0123544276390948	0.00771509973035992	5	0.04	7	Seasonality	High
-0.0608020569423284	-0.0522030811543183	5	0.04	7	Seasonality	High
-0.0239596362152936	-0.0213653816468136	5	0.04	7	Seasonality	High
-0.0388049456339488	-0.0457687075758016	5	0.04	7	Seasonality	High
-0.0166413891098923	-0.0223521083253045	5	0.04	7	Seasonality	High
-0.00090946942887715	0.00686745383515882	5	0.04	7	Seasonality	High
0.00512866378273059	0.00665686658003764	5	0.04	7	Seasonality	High
-0.00291251864498774	-0.00621900662248239	5	0.04	7	Seasonality	High
0.0205163719245571	0.0199186574506611	5	0.04	7	Seasonality	High
0.0294129046815468	0.0307430893188111	5	0.04	7	Seasonality	High
-0.0291963907267616	-0.0233430479813259	5	0.04	7	Seasonality	High
-0.0195392677831318	-0.0175035152381535	5	0.04	7	Seasonality	High
-0.0298919241394205	-0.028518760023162	5	0.04	7	Seasonality	High
-0.0136886279430793	-0.0124331435780682	5	0.04	7	Seasonality	High
-0.0148332873222788	-0.0183085792284096	5	0.04	7	Seasonality	High
0.0150647338101329	0.0107648806756195	5	0.04	7	Seasonality	High
0.00991605384394715	0.0107165389679966	5	0.04	7	Seasonality	High
-0.0361580412066786	-0.0373277249607863	5	0.04	7	Seasonality	High
-0.00492057142064361	-0.00906956728367871	5	0.04	7	Seasonality	High
0.0165197207020046	0.012448644152147	5	0.04	7	Seasonality	High
0.00329011040186596	0.00287264623609277	10	0.04	7	Seasonality	High
-0.0697289565650659	-0.0649852357849934	10	0.04	7	Seasonality	High
-0.0667826918649877	-0.0693289416562274	10	0.04	7	Seasonality	High
0.0338859363073449	0.0202172658526653	10	0.04	7	Seasonality	High
-0.00621186641541469	-0.00078672747632046	10	0.04	7	Seasonality	High
-0.0492723099213913	-0.0490046416587004	10	0.04	7	Seasonality	High
-0.0456419146263119	-0.0451344152065665	10	0.04	7	Seasonality	High
0.00427149250701412	0.000620454182500427	10	0.04	7	Seasonality	High
-0.0197186771127554	-0.0208796671187315	10	0.04	7	Seasonality	High
-0.0408024969779933	-0.0418156656771844	10	0.04	7	Seasonality	High
-0.0066377649080629	-0.00914363730667761	10	0.04	7	Seasonality	High
-0.00970106637614272	-0.00320949243186199	10	0.04	7	Seasonality	High
-0.038640977874717	-0.0311942893329597	10	0.04	7	Seasonality	High
0.0200685151481978	0.0123423644303585	10	0.04	7	Seasonality	High
0.0262467734458637	0.0188550735327062	10	0.04	7	Seasonality	High
-0.0451404382257644	-0.0447021719261817	10	0.04	7	Seasonality	High
-0.0684196249998538	-0.0656552721865154	10	0.04	7	Seasonality	High
-0.015231472006665	-0.0176307338869768	10	0.04	7	Seasonality	High
-0.0141911839034454	-0.0141419837820327	10	0.04	7	Seasonality	High
-0.0686104358202646	-0.0674847536627672	10	0.04	7	Seasonality	High
-0.00780631995813714	-0.00413795275958911	10	0.04	7	Seasonality	High
0.0105865179227759	0.0102993513807004	10	0.04	7	Seasonality	High
-0.0471811974399763	-0.0461992123830405	10	0.04	7	Seasonality	High
-0.0529486951289429	-0.0503824306606631	10	0.04	7	Seasonality	High
-0.0712415567507189	-0.0679699143831361	10	0.04	7	Seasonality	High
-0.055932228940199	-0.0549805557926523	10	0.04	7	Seasonality	High
-0.0537946389093246	-0.0486558939547032	10	0.04	7	Seasonality	High
-0.0659081638195482	-0.066777459489883	10	0.04	7	Seasonality	High
-0.0112050407834634	-0.00168317214081109	10	0.04	7	Seasonality	High
-0.0625180136533465	-0.0540003088576021	10	0.04	7	Seasonality	High
-0.034342050807664	-0.0392959113544667	500	0.04	7	Seasonality	High
-0.0927250428068959	-0.0924012029825085	500	0.04	7	Seasonality	High
-0.0689264101872772	-0.0688876580745802	500	0.04	7	Seasonality	High
-0.0719177971301321	-0.0670500468201143	500	0.04	7	Seasonality	High
-0.03028370693573	-0.027955843065588	500	0.04	7	Seasonality	High
-0.0451495498484007	-0.0416605024493663	500	0.04	7	Seasonality	High
-0.0374138830879425	-0.0376460696187694	500	0.04	7	Seasonality	High
0.0111705759700463	0.0121434254720959	500	0.04	7	Seasonality	High
-0.0612639693509676	-0.0643986399928705	500	0.04	7	Seasonality	High
0.00255386472160295	-0.00342473461150793	500	0.04	7	Seasonality	High
-0.0472089470075158	-0.0475108864664986	500	0.04	7	Seasonality	High
-0.00751538555840684	-0.00853593017048836	500	0.04	7	Seasonality	High
0.00223969000185024	0.00113502929134733	500	0.04	7	Seasonality	High
-0.0792604140961392	-0.083418132359721	500	0.04	7	Seasonality	High
-0.0241570692891186	-0.0214477926643112	500	0.04	7	Seasonality	High
-0.0593168837694356	-0.0570027073421785	500	0.04	7	Seasonality	High
-0.0703102859166949	-0.0732272104709126	500	0.04	7	Seasonality	High
-0.0558948888679342	-0.0549032477257837	500	0.04	7	Seasonality	High
-0.0270300858719899	-0.0283842178977218	500	0.04	7	Seasonality	High
-0.00900897202562707	-0.00694874959922977	500	0.04	7	Seasonality	High
-0.0671875508688526	-0.0675462744146424	500	0.04	7	Seasonality	High
0.000962005288555909	0.0017910087869686	500	0.04	7	Seasonality	High
-0.0858289514542549	-0.0892964880470902	500	0.04	7	Seasonality	High
-0.0157385409599446	-0.0183901351660354	500	0.04	7	Seasonality	High
-0.0962103187148833	-0.095943018670126	500	0.04	7	Seasonality	High
-0.0159365417578116	-0.0143096730882239	500	0.04	7	Seasonality	High
-0.036511119874301	-0.0370240154416755	500	0.04	7	Seasonality	High
-0.00975355482604947	-0.01018532034291	500	0.04	7	Seasonality	High
-0.0185284937489881	-0.0168162283008489	500	0.04	7	Seasonality	High
-0.0153622592547148	-0.0118152997651233	500	0.04	7	Seasonality	High
-0.0233155640562444	-0.0261923870727224	5	0.04	18	Seasonality	High
-0.00972798845235382	-0.0119512910781621	5	0.04	18	Seasonality	High
-0.0181008880382236	-0.0149668989005431	5	0.04	18	Seasonality	High
0.00768588704158733	0.00781704135523044	5	0.04	18	Seasonality	High
0.0112117714768744	0.00886057385256141	5	0.04	18	Seasonality	High
0.0158982215975379	0.0152001964157942	5	0.04	18	Seasonality	High
0.0345486975288099	0.0319931570572094	5	0.04	18	Seasonality	High
0.00744758850990795	0.0101497916517867	5	0.04	18	Seasonality	High
0.0234530172232161	0.0244190908632435	5	0.04	18	Seasonality	High
-0.00132584599030883	-0.00487246219886448	5	0.04	18	Seasonality	High
-0.00674578686924068	-0.00860005353102556	5	0.04	18	Seasonality	High
0.0223478465281422	0.0213830172844453	5	0.04	18	Seasonality	High
0.0236379893921491	0.0204666652388603	5	0.04	18	Seasonality	High
-0.00582878889298228	-0.00657968783819934	5	0.04	18	Seasonality	High
-0.00373290458376624	-0.0107665557730926	5	0.04	18	Seasonality	High
-0.0141329385489774	-0.00912303165523618	5	0.04	18	Seasonality	High
-0.00135794443189738	-0.00278463153471314	5	0.04	18	Seasonality	High
-0.0058007951713118	-0.000619779305767483	5	0.04	18	Seasonality	High
-0.0180456766927845	-0.0189744371414509	5	0.04	18	Seasonality	High
0.0028362409280603	0.000248912660494776	5	0.04	18	Seasonality	High
0.0283980464872645	0.0265782448975448	5	0.04	18	Seasonality	High
0.0241263994825873	0.0258570307337155	5	0.04	18	Seasonality	High
-0.00208845775757627	-0.00264678973641222	5	0.04	18	Seasonality	High
-0.0214053575411737	-0.0298670592097625	5	0.04	18	Seasonality	High
5.61527832886732e-05	0.0027368572394359	5	0.04	18	Seasonality	High
0.0127154758009983	0.0179070588329732	5	0.04	18	Seasonality	High
-0.0130607958911985	-0.019730468696031	5	0.04	18	Seasonality	High
0.00491191170559398	0.0037155799608379	5	0.04	18	Seasonality	High
0.00175453276575819	0.000298553347394459	5	0.04	18	Seasonality	High
-0.0168182280477269	-0.0228920415278914	5	0.04	18	Seasonality	High
0.0131091312299637	0.0149144765852313	5	0.04	18	Seasonality	High
0.025634755505925	0.0262001042349012	5	0.04	18	Seasonality	High
0.0154775067792772	0.0185465441346256	5	0.04	18	Seasonality	High
0.0275909917612086	0.0314681470329681	5	0.04	18	Seasonality	High
0.0310100420781448	0.0300276920801284	5	0.04	18	Seasonality	High
-0.00599994567419738	-0.00474891069471439	5	0.04	18	Seasonality	High
-0.0112793509491847	-0.0146557197142739	5	0.04	18	Seasonality	High
0.0143993472086013	0.0111331995328799	5	0.04	18	Seasonality	High
0.0291293668178743	0.0317360314232129	5	0.04	18	Seasonality	High
0.000929938996858084	0.000127390744234611	5	0.04	18	Seasonality	High
0.00504329160127113	0.00529750650150899	10	0.04	18	Seasonality	High
-0.0480519110728299	-0.0421059699831939	10	0.04	18	Seasonality	High
-0.0217875604173625	-0.020817702756146	10	0.04	18	Seasonality	High
-0.0250711275290745	-0.0259376628687474	10	0.04	18	Seasonality	High
-0.00320929840454062	-0.000420283671545644	10	0.04	18	Seasonality	High
-0.0348193250399892	-0.0297339841716475	10	0.04	18	Seasonality	High
-0.000628910661278918	0.0019625579777066	10	0.04	18	Seasonality	High
0.0293701234475372	0.0300570363727966	10	0.04	18	Seasonality	High
-0.0363574525355758	-0.0415265140488334	10	0.04	18	Seasonality	High
0.02785018110451	0.0260505691541149	10	0.04	18	Seasonality	High
-0.0288532074394477	-0.0284029687754904	10	0.04	18	Seasonality	High
0.0150683962746412	0.0185159916544288	10	0.04	18	Seasonality	High
0.0225887281434928	0.0165732683435106	10	0.04	18	Seasonality	High
0.009943537666921	0.0148883849013866	10	0.04	18	Seasonality	High
0.00793001134158432	0.00765930897417102	10	0.04	18	Seasonality	High
0.0189813630844663	0.016254941923929	10	0.04	18	Seasonality	High
0.0168097334244109	0.0181019770245362	10	0.04	18	Seasonality	High
0.0139615921584698	0.00608575561809125	10	0.04	18	Seasonality	High
0.013096956981304	0.0125900775829606	10	0.04	18	Seasonality	High
-0.0183075263374792	-0.0149783952671052	10	0.04	18	Seasonality	High
-0.0223924542201671	-0.021705746735731	10	0.04	18	Seasonality	High
-0.00716158549043456	-0.0104334529715619	10	0.04	18	Seasonality	High
0.0047402781580083	0.00199226707647892	10	0.04	18	Seasonality	High
-0.019260244776244	-0.0189857780894943	10	0.04	18	Seasonality	High
-0.00386024206479238	0.00123077726318466	10	0.04	18	Seasonality	High
0.0101447726038313	0.0045009235712512	10	0.04	18	Seasonality	High
-0.00839261416899617	-0.00683317038547719	10	0.04	18	Seasonality	High
0.00957215959722724	0.00679686692462712	10	0.04	18	Seasonality	High
0.0258793209876428	0.018907356539855	10	0.04	18	Seasonality	High
-0.0431715814260451	-0.0385410257978387	10	0.04	18	Seasonality	High
-0.0457188365657155	-0.04618472277549	500	0.04	18	Seasonality	High
-0.0204151483700662	-0.0194005054048472	500	0.04	18	Seasonality	High
-0.0388766067044755	-0.0388253893830712	500	0.04	18	Seasonality	High
-0.0140222728064298	-0.0146462918526028	500	0.04	18	Seasonality	High
0.0108711885541089	0.0115775873138006	500	0.04	18	Seasonality	High
0.0148243002471875	0.016153434730172	500	0.04	18	Seasonality	High
0.0246326669364241	0.0257565507484001	500	0.04	18	Seasonality	High
-0.0104339492714842	-0.0121888414725685	500	0.04	18	Seasonality	High
0.022097794475892	0.0185537114081268	500	0.04	18	Seasonality	High
-0.0332081993885954	-0.0340824733497209	500	0.04	18	Seasonality	High
-0.035731795648433	-0.0362038276079089	500	0.04	18	Seasonality	High
0.011583102934546	0.0105894683731788	500	0.04	18	Seasonality	High
0.00988037865704005	0.00892079945655971	500	0.04	18	Seasonality	High
-0.0110906242415851	-0.0114638220939823	500	0.04	18	Seasonality	High
-0.063933005046722	-0.0609121582693843	500	0.04	18	Seasonality	High
-0.00346474235693756	-0.00163890712376025	500	0.04	18	Seasonality	High
0.0236538958785071	0.0240840256359691	500	0.04	18	Seasonality	High
-0.0177912428995767	-0.016993905981306	500	0.04	18	Seasonality	High
-0.00394638925201379	-0.00675734821106422	500	0.04	18	Seasonality	High
-0.0572028725747625	-0.0583986894743452	500	0.04	18	Seasonality	High
0.0199255024186645	0.025257960180903	500	0.04	18	Seasonality	High
-0.0690191302375177	-0.0680718452096556	500	0.04	18	Seasonality	High
0.0129974762519413	0.0115552540304852	500	0.04	18	Seasonality	High
0.010229192000191	0.0123700574733868	500	0.04	18	Seasonality	High
-0.046072151186696	-0.0466348442593259	500	0.04	18	Seasonality	High
-0.000496577117286211	0.000421214088272365	500	0.04	18	Seasonality	High
-0.033747871118733	-0.0333724710266342	500	0.04	18	Seasonality	High
-0.00658776793085786	-0.00746966644876468	500	0.04	18	Seasonality	High
-0.0616578394323337	-0.0604467513030598	500	0.04	18	Seasonality	High
-0.0640106941499388	-0.0621787655260635	500	0.04	18	Seasonality	High
