# Supplementary material for: The influence of biological, epidemiological, and treatment factors on the establishment and spread of drug-resistant Plasmodium falciparum
Source: eLife. 2022 Jul 7;11:e77634. doi: 10.7554/eLife.77634 (PMC9262398; doi:10.7554/eLife.77634)
Supplement: Appendix 1—figure 9—source data 1. [file elife-77634-app1-fig9-data1.csv]

Test_True	Test_predicted	Eir	Access_treatment	Resistance_level	Seasonality_pattern	Adherence_treatment
-0.05131357	-0.05327337	5	0.04	2.5	No seasonality	Low
-0.01785369	-0.0159408	5	0.04	2.5	No seasonality	Low
-0.06306561	-0.06290145	5	0.04	2.5	No seasonality	Low
0.001345363	0.006908653	5	0.04	2.5	No seasonality	Low
-0.01517344	-0.01477063	5	0.04	2.5	No seasonality	Low
-0.04419924	-0.04336109	5	0.04	2.5	No seasonality	Low
-0.06069192	-0.06301386	5	0.04	2.5	No seasonality	Low
-0.01396024	-0.01008064	5	0.04	2.5	No seasonality	Low
-0.0122687	-0.01441801	5	0.04	2.5	No seasonality	Low
-0.03069018	-0.02889451	5	0.04	2.5	No seasonality	Low
-0.05508149	-0.05402038	5	0.04	2.5	No seasonality	Low
-0.03501014	-0.03379401	5	0.04	2.5	No seasonality	Low
-0.006007186	-0.005592867	5	0.04	2.5	No seasonality	Low
-0.06990615	-0.06741566	5	0.04	2.5	No seasonality	Low
-0.0339411	-0.02949139	5	0.04	2.5	No seasonality	Low
0.01151296	0.01052402	5	0.04	2.5	No seasonality	Low
-0.05384385	-0.05525533	5	0.04	2.5	No seasonality	Low
-0.02806723	-0.02686145	5	0.04	2.5	No seasonality	Low
-0.04927659	-0.05019303	5	0.04	2.5	No seasonality	Low
-0.06886002	-0.06687845	5	0.04	2.5	No seasonality	Low
-0.01765312	-0.01950139	5	0.04	2.5	No seasonality	Low
-0.02340433	-0.02301662	5	0.04	2.5	No seasonality	Low
-0.03019509	-0.02917729	5	0.04	2.5	No seasonality	Low
-0.02312958	-0.02444061	5	0.04	2.5	No seasonality	Low
0.006394533	0.006056482	5	0.04	2.5	No seasonality	Low
-0.01199467	-0.01381684	5	0.04	2.5	No seasonality	Low
-0.06896178	-0.06573446	5	0.04	2.5	No seasonality	Low
-0.003653923	-0.004316334	5	0.04	2.5	No seasonality	Low
-0.05516122	-0.05201625	5	0.04	2.5	No seasonality	Low
-0.001419741	-0.003594212	5	0.04	2.5	No seasonality	Low
-0.02945801	-0.03037419	10	0.04	2.5	No seasonality	Low
-0.07371374	-0.07588646	10	0.04	2.5	No seasonality	Low
-0.02936752	-0.0310172	10	0.04	2.5	No seasonality	Low
-0.06627174	-0.06695502	10	0.04	2.5	No seasonality	Low
-0.01494733	-0.01372174	10	0.04	2.5	No seasonality	Low
-0.04838598	-0.04954653	10	0.04	2.5	No seasonality	Low
-0.003096486	-0.005084289	10	0.04	2.5	No seasonality	Low
-0.0354511	-0.03412116	10	0.04	2.5	No seasonality	Low
-0.02775655	-0.03293563	10	0.04	2.5	No seasonality	Low
-0.04794395	-0.04713278	10	0.04	2.5	No seasonality	Low
-0.004798392	-0.005675468	10	0.04	2.5	No seasonality	Low
-0.01164173	-0.01486107	10	0.04	2.5	No seasonality	Low
-0.04153095	-0.03908404	10	0.04	2.5	No seasonality	Low
-0.004991179	-0.002216455	10	0.04	2.5	No seasonality	Low
0.01287268	0.004447554	10	0.04	2.5	No seasonality	Low
-0.03265761	-0.02931721	10	0.04	2.5	No seasonality	Low
0.003871	0.01508611	10	0.04	2.5	No seasonality	Low
-0.0009372476	0.006535584	10	0.04	2.5	No seasonality	Low
-0.01342852	-0.01584052	10	0.04	2.5	No seasonality	Low
-0.04830918	-0.048224	10	0.04	2.5	No seasonality	Low
-0.03239158	-0.02879536	10	0.04	2.5	No seasonality	Low
-0.04688872	-0.04463877	10	0.04	2.5	No seasonality	Low
-0.07667265	-0.07806826	10	0.04	2.5	No seasonality	Low
-0.05318242	-0.05300466	10	0.04	2.5	No seasonality	Low
-0.04843923	-0.04825689	10	0.04	2.5	No seasonality	Low
-0.01492398	-0.01964944	10	0.04	2.5	No seasonality	Low
-0.03513635	-0.04171738	10	0.04	2.5	No seasonality	Low
0.00725933	0.003621841	10	0.04	2.5	No seasonality	Low
-0.003976154	-0.003426758	10	0.04	2.5	No seasonality	Low
-0.03062728	-0.02750445	10	0.04	2.5	No seasonality	Low
-0.09206868	-0.08912643	500	0.04	2.5	No seasonality	Low
-0.007463206	-0.005429012	500	0.04	2.5	No seasonality	Low
-0.03613888	-0.03625415	500	0.04	2.5	No seasonality	Low
-0.06871358	-0.0688203	500	0.04	2.5	No seasonality	Low
-0.076762	-0.07631514	500	0.04	2.5	No seasonality	Low
-0.01596763	-0.01431503	500	0.04	2.5	No seasonality	Low
0.001699351	0.003274462	500	0.04	2.5	No seasonality	Low
-0.01030808	-0.01091965	500	0.04	2.5	No seasonality	Low
-0.0661626	-0.06491756	500	0.04	2.5	No seasonality	Low
-0.05598316	-0.05537417	500	0.04	2.5	No seasonality	Low
-0.01869413	-0.02067203	500	0.04	2.5	No seasonality	Low
-0.01066579	-0.009233208	500	0.04	2.5	No seasonality	Low
-0.08522974	-0.08616533	500	0.04	2.5	No seasonality	Low
-0.08319155	-0.08564628	500	0.04	2.5	No seasonality	Low
-0.01682552	-0.01841469	500	0.04	2.5	No seasonality	Low
-0.05620159	-0.05549284	500	0.04	2.5	No seasonality	Low
-0.02554489	-0.02472453	500	0.04	2.5	No seasonality	Low
-0.08242785	-0.08101354	500	0.04	2.5	No seasonality	Low
-0.0337949	-0.03513989	500	0.04	2.5	No seasonality	Low
-0.07326129	-0.07365407	500	0.04	2.5	No seasonality	Low
-0.06988042	-0.06641946	500	0.04	2.5	No seasonality	Low
-0.07519671	-0.07595339	500	0.04	2.5	No seasonality	Low
-0.08439273	-0.08712664	500	0.04	2.5	No seasonality	Low
-0.02278696	-0.02257982	500	0.04	2.5	No seasonality	Low
0.002073811	0.004684387	500	0.04	2.5	No seasonality	Low
-0.05221002	-0.04748054	500	0.04	2.5	No seasonality	Low
0.01059769	0.006795369	500	0.04	2.5	No seasonality	Low
-0.08805162	-0.08837088	500	0.04	2.5	No seasonality	Low
-0.004722137	-0.007537519	500	0.04	2.5	No seasonality	Low
-0.03531401	-0.03487892	500	0.04	2.5	No seasonality	Low
0.02414937	0.0256979	5	0.04	10	No seasonality	Low
0.0466579	0.04175991	5	0.04	10	No seasonality	Low
0.034253	0.03390489	5	0.04	10	No seasonality	Low
-0.01375814	-0.01122558	5	0.04	10	No seasonality	Low
-0.003160446	-0.0004792822	5	0.04	10	No seasonality	Low
-0.01827513	-0.01955426	5	0.04	10	No seasonality	Low
0.02901423	0.02991188	5	0.04	10	No seasonality	Low
0.01895811	0.02164069	5	0.04	10	No seasonality	Low
0.01452317	0.01019523	5	0.04	10	No seasonality	Low
0.006515411	0.00676464	5	0.04	10	No seasonality	Low
-0.02826225	-0.02884692	5	0.04	10	No seasonality	Low
0.02336286	0.01551293	5	0.04	10	No seasonality	Low
-0.0003537206	0.00448298	5	0.04	10	No seasonality	Low
0.01163614	0.01430884	5	0.04	10	No seasonality	Low
-0.001908679	-0.0007563021	5	0.04	10	No seasonality	Low
-2.261216e-05	-0.0007535489	5	0.04	10	No seasonality	Low
-0.03704904	-0.02421196	5	0.04	10	No seasonality	Low
0.006621045	0.009385631	5	0.04	10	No seasonality	Low
-0.01711528	-0.01581483	5	0.04	10	No seasonality	Low
-0.001442218	-0.00403483	5	0.04	10	No seasonality	Low
0.009164264	0.005679892	5	0.04	10	No seasonality	Low
-0.007428715	-0.009950552	5	0.04	10	No seasonality	Low
0.002137108	-0.001757099	5	0.04	10	No seasonality	Low
0.02249208	0.02298477	5	0.04	10	No seasonality	Low
0.04245365	0.03768139	5	0.04	10	No seasonality	Low
0.001352502	8.406061e-05	5	0.04	10	No seasonality	Low
0.02632993	0.02263756	5	0.04	10	No seasonality	Low
0.03964146	0.03525099	5	0.04	10	No seasonality	Low
0.03693626	0.03761786	5	0.04	10	No seasonality	Low
0.0373635	0.03552863	5	0.04	10	No seasonality	Low
0.009137676	0.0100743	10	0.04	10	No seasonality	Low
-0.03644491	-0.03634439	10	0.04	10	No seasonality	Low
-0.02959571	-0.02601939	10	0.04	10	No seasonality	Low
-0.02203948	-0.02313729	10	0.04	10	No seasonality	Low
0.0162201	0.0149064	10	0.04	10	No seasonality	Low
0.01535935	0.01736076	10	0.04	10	No seasonality	Low
0.002699407	0.003804707	10	0.04	10	No seasonality	Low
0.005562112	0.00509953	10	0.04	10	No seasonality	Low
-0.01170466	-0.01148014	10	0.04	10	No seasonality	Low
0.02912324	0.02887499	10	0.04	10	No seasonality	Low
-0.0466077	-0.04701347	10	0.04	10	No seasonality	Low
-0.003421508	-0.00416577	10	0.04	10	No seasonality	Low
0.003286717	0.0045987	10	0.04	10	No seasonality	Low
-0.03379522	-0.03440349	10	0.04	10	No seasonality	Low
0.03903107	0.03966278	10	0.04	10	No seasonality	Low
-0.02334514	-0.02499992	10	0.04	10	No seasonality	Low
0.03475412	0.03538004	10	0.04	10	No seasonality	Low
0.01349536	0.01066475	10	0.04	10	No seasonality	Low
0.000423774	0.001780385	10	0.04	10	No seasonality	Low
-0.008719035	-0.008265009	10	0.04	10	No seasonality	Low
0.01735808	0.01700732	10	0.04	10	No seasonality	Low
0.01351268	0.01222419	10	0.04	10	No seasonality	Low
0.03715394	0.03551137	10	0.04	10	No seasonality	Low
0.01533568	0.01534816	10	0.04	10	No seasonality	Low
-0.03919493	-0.03909118	10	0.04	10	No seasonality	Low
-0.008655938	-0.009709613	10	0.04	10	No seasonality	Low
0.03293664	0.03426981	10	0.04	10	No seasonality	Low
0.004819302	0.004854385	10	0.04	10	No seasonality	Low
-0.02228825	-0.02290897	10	0.04	10	No seasonality	Low
-0.03020207	-0.03364525	10	0.04	10	No seasonality	Low
-0.05433368	-0.05043053	500	0.04	10	No seasonality	Low
-0.04196613	-0.04095437	500	0.04	10	No seasonality	Low
-0.04724707	-0.04172565	500	0.04	10	No seasonality	Low
-0.01588253	-0.01724976	500	0.04	10	No seasonality	Low
0.02563978	0.0259001	500	0.04	10	No seasonality	Low
0.008001067	0.008499136	500	0.04	10	No seasonality	Low
-0.02991325	-0.02906196	500	0.04	10	No seasonality	Low
0.03591537	0.03562919	500	0.04	10	No seasonality	Low
0.04355148	0.04188009	500	0.04	10	No seasonality	Low
0.01440575	0.01289262	500	0.04	10	No seasonality	Low
0.03399979	0.0300013	500	0.04	10	No seasonality	Low
0.02775568	0.03008148	500	0.04	10	No seasonality	Low
-0.05887939	-0.056948	500	0.04	10	No seasonality	Low
0.04923707	0.04967213	500	0.04	10	No seasonality	Low
0.001846144	0.002092115	500	0.04	10	No seasonality	Low
-0.0005743472	-0.002013562	500	0.04	10	No seasonality	Low
0.01459522	0.008930646	500	0.04	10	No seasonality	Low
-0.00580881	-0.008723677	500	0.04	10	No seasonality	Low
-0.04341189	-0.04276945	500	0.04	10	No seasonality	Low
-0.007343882	-0.007528832	500	0.04	10	No seasonality	Low
0.01855001	0.01564437	500	0.04	10	No seasonality	Low
-0.02238292	-0.01924374	500	0.04	10	No seasonality	Low
0.01846408	0.01212708	500	0.04	10	No seasonality	Low
-0.03891268	-0.03944845	500	0.04	10	No seasonality	Low
0.03916215	0.04008889	500	0.04	10	No seasonality	Low
0.02246202	0.0218288	500	0.04	10	No seasonality	Low
0.03793271	0.0384915	500	0.04	10	No seasonality	Low
0.004027977	0.001947524	500	0.04	10	No seasonality	Low
0.009701341	0.008848018	500	0.04	10	No seasonality	Low
0.03920236	0.03777425	500	0.04	10	No seasonality	Low
-0.01222431	-0.01203329	500	0.04	10	No seasonality	Low
-0.05975498	-0.05873845	5	0.04	2.5	No seasonality	High
-0.02273901	-0.02148175	5	0.04	2.5	No seasonality	High
-0.02846367	-0.02498366	5	0.04	2.5	No seasonality	High
-0.07156415	-0.06861496	5	0.04	2.5	No seasonality	High
-0.01405993	-0.01416054	5	0.04	2.5	No seasonality	High
-0.02765432	-0.02770276	5	0.04	2.5	No seasonality	High
-0.02906954	-0.02851014	5	0.04	2.5	No seasonality	High
-0.0124747	-0.01146462	5	0.04	2.5	No seasonality	High
-0.04376075	-0.0421683	5	0.04	2.5	No seasonality	High
-0.03454817	-0.03464773	5	0.04	2.5	No seasonality	High
-0.04267706	-0.0424893	5	0.04	2.5	No seasonality	High
-0.05645189	-0.05728638	5	0.04	2.5	No seasonality	High
-0.01720668	-0.01650073	5	0.04	2.5	No seasonality	High
-0.006770155	-0.004359916	5	0.04	2.5	No seasonality	High
-0.03364538	-0.03068758	5	0.04	2.5	No seasonality	High
-0.001463748	-0.001627262	5	0.04	2.5	No seasonality	High
-0.03631656	-0.03483518	5	0.04	2.5	No seasonality	High
-0.006611247	-0.004927554	5	0.04	2.5	No seasonality	High
-0.0286121	-0.02477706	5	0.04	2.5	No seasonality	High
-0.05411628	-0.05563704	5	0.04	2.5	No seasonality	High
-0.03634311	-0.03744241	5	0.04	2.5	No seasonality	High
-0.07361869	-0.07079521	5	0.04	2.5	No seasonality	High
-0.03389925	-0.03620468	5	0.04	2.5	No seasonality	High
-0.02551909	-0.02761821	5	0.04	2.5	No seasonality	High
-0.03499406	-0.03675819	5	0.04	2.5	No seasonality	High
-0.06514226	-0.06592923	5	0.04	2.5	No seasonality	High
-0.01712303	-0.01774854	5	0.04	2.5	No seasonality	High
-0.008921714	-0.008862454	5	0.04	2.5	No seasonality	High
-0.01134292	-0.01437539	5	0.04	2.5	No seasonality	High
-0.05019471	-0.05276556	5	0.04	2.5	No seasonality	High
-0.0680637	-0.06801777	10	0.04	2.5	No seasonality	High
-0.02225041	-0.02026159	10	0.04	2.5	No seasonality	High
-0.01280384	-0.01423451	10	0.04	2.5	No seasonality	High
-0.03815486	-0.03860698	10	0.04	2.5	No seasonality	High
-0.04897722	-0.04855646	10	0.04	2.5	No seasonality	High
-0.06069361	-0.06104392	10	0.04	2.5	No seasonality	High
-0.0126488	-0.01167644	10	0.04	2.5	No seasonality	High
-0.07869072	-0.07723696	10	0.04	2.5	No seasonality	High
-0.01380606	-0.01228535	10	0.04	2.5	No seasonality	High
-0.0386017	-0.03586843	10	0.04	2.5	No seasonality	High
-0.02964945	-0.02787519	10	0.04	2.5	No seasonality	High
-0.02607702	-0.02546223	10	0.04	2.5	No seasonality	High
-0.06809404	-0.06998614	10	0.04	2.5	No seasonality	High
-0.07281823	-0.06742439	10	0.04	2.5	No seasonality	High
-0.03192669	-0.03159087	10	0.04	2.5	No seasonality	High
-0.06256826	-0.06392538	10	0.04	2.5	No seasonality	High
0.005314977	0.006350836	10	0.04	2.5	No seasonality	High
-0.01486077	-0.01732869	10	0.04	2.5	No seasonality	High
-0.03083755	-0.03248593	10	0.04	2.5	No seasonality	High
-0.0221485	-0.02079975	10	0.04	2.5	No seasonality	High
-0.01653485	-0.0183268	10	0.04	2.5	No seasonality	High
-0.04402473	-0.04504152	10	0.04	2.5	No seasonality	High
-0.04577172	-0.04703506	10	0.04	2.5	No seasonality	High
-0.0123894	-0.01615171	10	0.04	2.5	No seasonality	High
-0.01187206	-0.01232233	10	0.04	2.5	No seasonality	High
-0.06123281	-0.06156302	10	0.04	2.5	No seasonality	High
-0.02173091	-0.02234543	10	0.04	2.5	No seasonality	High
-0.05831245	-0.0563367	10	0.04	2.5	No seasonality	High
-0.009590128	-0.009387361	10	0.04	2.5	No seasonality	High
-0.02099684	-0.02606269	10	0.04	2.5	No seasonality	High
-0.02935357	-0.03017205	500	0.04	2.5	No seasonality	High
0.0138413	0.01214234	500	0.04	2.5	No seasonality	High
-0.05239803	-0.05270229	500	0.04	2.5	No seasonality	High
-0.08377286	-0.08096424	500	0.04	2.5	No seasonality	High
-0.07461421	-0.07430028	500	0.04	2.5	No seasonality	High
-0.06965135	-0.07091634	500	0.04	2.5	No seasonality	High
-0.05878591	-0.05816535	500	0.04	2.5	No seasonality	High
-0.0162754	-0.01730695	500	0.04	2.5	No seasonality	High
-0.0551445	-0.05506465	500	0.04	2.5	No seasonality	High
-0.0831989	-0.08550137	500	0.04	2.5	No seasonality	High
-0.0184918	-0.01873253	500	0.04	2.5	No seasonality	High
-0.009747632	-0.008351921	500	0.04	2.5	No seasonality	High
-0.0570318	-0.05607838	500	0.04	2.5	No seasonality	High
-0.002034568	-0.004419956	500	0.04	2.5	No seasonality	High
-0.02987581	-0.03111602	500	0.04	2.5	No seasonality	High
-0.04297909	-0.04362314	500	0.04	2.5	No seasonality	High
-0.03762947	-0.03870117	500	0.04	2.5	No seasonality	High
0.006660453	0.004205645	500	0.04	2.5	No seasonality	High
-0.04526068	-0.04175094	500	0.04	2.5	No seasonality	High
-0.03886525	-0.0365339	500	0.04	2.5	No seasonality	High
-0.07041631	-0.06892625	500	0.04	2.5	No seasonality	High
-0.02394904	-0.02459945	500	0.04	2.5	No seasonality	High
-0.0557448	-0.05725248	500	0.04	2.5	No seasonality	High
-0.005355154	-0.007364954	500	0.04	2.5	No seasonality	High
-0.0176674	-0.01722486	500	0.04	2.5	No seasonality	High
-0.05902667	-0.06069167	500	0.04	2.5	No seasonality	High
-0.005623429	-0.005965187	500	0.04	2.5	No seasonality	High
0.002418806	0.00291961	500	0.04	2.5	No seasonality	High
0.003209741	0.003009339	500	0.04	2.5	No seasonality	High
-0.08190685	-0.08222975	500	0.04	2.5	No seasonality	High
-0.02061592	-0.01845358	5	0.04	10	No seasonality	High
0.004535668	0.005758475	5	0.04	10	No seasonality	High
0.001076251	0.001203799	5	0.04	10	No seasonality	High
0.005131062	0.004681596	5	0.04	10	No seasonality	High
0.04869116	0.04970513	5	0.04	10	No seasonality	High
0.02402434	0.02701063	5	0.04	10	No seasonality	High
0.01114791	0.01053852	5	0.04	10	No seasonality	High
0.01786979	0.01516501	5	0.04	10	No seasonality	High
0.03844263	0.03717947	5	0.04	10	No seasonality	High
0.03249419	0.02801763	5	0.04	10	No seasonality	High
0.02018927	0.01966121	5	0.04	10	No seasonality	High
0.01084927	0.007453472	5	0.04	10	No seasonality	High
0.02969866	0.0233496	5	0.04	10	No seasonality	High
-0.01026567	-0.007331055	5	0.04	10	No seasonality	High
-0.02632611	-0.02533898	5	0.04	10	No seasonality	High
0.0306535	0.02901741	5	0.04	10	No seasonality	High
0.0031917	0.008943481	5	0.04	10	No seasonality	High
0.04643314	0.04525544	5	0.04	10	No seasonality	High
-0.02006973	-0.01809657	5	0.04	10	No seasonality	High
-0.001004133	0.002061817	5	0.04	10	No seasonality	High
-0.004272426	-0.005061894	5	0.04	10	No seasonality	High
0.02495969	0.02274187	5	0.04	10	No seasonality	High
-0.008857874	-0.008417283	5	0.04	10	No seasonality	High
-0.007506555	-0.007921339	5	0.04	10	No seasonality	High
0.03927835	0.0356288	5	0.04	10	No seasonality	High
-0.006821516	-0.007164448	5	0.04	10	No seasonality	High
-0.03072169	-0.02664803	5	0.04	10	No seasonality	High
0.006053165	0.007925864	5	0.04	10	No seasonality	High
0.03744542	0.03427629	5	0.04	10	No seasonality	High
0.01349389	0.01352898	5	0.04	10	No seasonality	High
-0.01564784	-0.01193859	10	0.04	10	No seasonality	High
0.009543346	0.007867002	10	0.04	10	No seasonality	High
-0.01400956	-0.01329247	10	0.04	10	No seasonality	High
-0.0002834942	-0.0001663568	10	0.04	10	No seasonality	High
0.03292196	0.03215575	10	0.04	10	No seasonality	High
-0.01553396	-0.01409016	10	0.04	10	No seasonality	High
0.04774001	0.04551384	10	0.04	10	No seasonality	High
0.01505173	0.01222452	10	0.04	10	No seasonality	High
0.01640498	0.01654983	10	0.04	10	No seasonality	High
0.0002347902	0.002560341	10	0.04	10	No seasonality	High
0.006778094	0.0058116	10	0.04	10	No seasonality	High
0.0004935928	0.001855223	10	0.04	10	No seasonality	High
-0.02574453	-0.02651483	10	0.04	10	No seasonality	High
0.03847447	0.03839288	10	0.04	10	No seasonality	High
0.007450141	0.003277971	10	0.04	10	No seasonality	High
-0.04413312	-0.04167607	10	0.04	10	No seasonality	High
-0.02394446	-0.02409702	10	0.04	10	No seasonality	High
-0.02645528	-0.02699496	10	0.04	10	No seasonality	High
0.004576707	0.006987625	10	0.04	10	No seasonality	High
-0.01215533	-0.01371488	10	0.04	10	No seasonality	High
-0.0363467	-0.03510468	10	0.04	10	No seasonality	High
-0.01077658	-0.01015312	10	0.04	10	No seasonality	High
-0.01197546	-0.01297193	10	0.04	10	No seasonality	High
0.0207614	0.0173999	10	0.04	10	No seasonality	High
0.01790223	0.02008162	10	0.04	10	No seasonality	High
0.02677803	0.02573344	10	0.04	10	No seasonality	High
-0.01096547	-0.01314237	10	0.04	10	No seasonality	High
-0.02536398	-0.02586318	10	0.04	10	No seasonality	High
0.0228508	0.02315943	10	0.04	10	No seasonality	High
0.02865577	0.02776952	10	0.04	10	No seasonality	High
0.008359363	0.01151573	500	0.04	10	No seasonality	High
0.05712858	0.05671639	500	0.04	10	No seasonality	High
0.05288212	0.05340884	500	0.04	10	No seasonality	High
-0.04422946	-0.04377993	500	0.04	10	No seasonality	High
-0.001372476	0.000410302	500	0.04	10	No seasonality	High
-0.03537051	-0.03117257	500	0.04	10	No seasonality	High
0.009241365	0.01153521	500	0.04	10	No seasonality	High
0.01418772	0.01471306	500	0.04	10	No seasonality	High
0.04010112	0.04092033	500	0.04	10	No seasonality	High
-0.008897339	-0.008098437	500	0.04	10	No seasonality	High
0.05599243	0.053278	500	0.04	10	No seasonality	High
-0.04081936	-0.04347299	500	0.04	10	No seasonality	High
0.02878399	0.03023084	500	0.04	10	No seasonality	High
-0.02540653	-0.02581014	500	0.04	10	No seasonality	High
0.02080294	0.02114319	500	0.04	10	No seasonality	High
0.03747016	0.03499157	500	0.04	10	No seasonality	High
0.004559221	0.001194783	500	0.04	10	No seasonality	High
0.02369559	0.02355345	500	0.04	10	No seasonality	High
-0.000362663	-0.0007904372	500	0.04	10	No seasonality	High
-0.005289366	-0.005763079	500	0.04	10	No seasonality	High
-0.02413898	-0.02332118	500	0.04	10	No seasonality	High
0.009612103	0.007663442	500	0.04	10	No seasonality	High
-0.02714152	-0.02560012	500	0.04	10	No seasonality	High
0.04291664	0.04260367	500	0.04	10	No seasonality	High
0.03992693	0.03294715	500	0.04	10	No seasonality	High
-0.01833089	-0.02038653	500	0.04	10	No seasonality	High
-0.03272926	-0.03681774	500	0.04	10	No seasonality	High
0.04976974	0.04690413	500	0.04	10	No seasonality	High
0.04211385	0.0397529	500	0.04	10	No seasonality	High
-0.03519436	-0.03665771	500	0.04	10	No seasonality	High
-0.03759514	-0.04072507	500	0.04	10	No seasonality	High
-0.04182536	-0.03985853	5	0.04	2.5	Seasonality	Low
-0.01851285	-0.01869564	5	0.04	2.5	Seasonality	Low
-0.06241858	-0.06059983	5	0.04	2.5	Seasonality	Low
-0.002111189	0.002323137	5	0.04	2.5	Seasonality	Low
-0.03563512	-0.0317737	5	0.04	2.5	Seasonality	Low
-0.03640805	-0.03935689	5	0.04	2.5	Seasonality	Low
-0.0002084099	-0.001589513	5	0.04	2.5	Seasonality	Low
-0.01908983	-0.01404159	5	0.04	2.5	Seasonality	Low
-0.0462453	-0.04556404	5	0.04	2.5	Seasonality	Low
-0.0199509	-0.02504359	5	0.04	2.5	Seasonality	Low
-0.03581632	-0.03832148	5	0.04	2.5	Seasonality	Low
-0.02417087	-0.02044202	5	0.04	2.5	Seasonality	Low
-0.01307094	-0.01722863	5	0.04	2.5	Seasonality	Low
0.004226984	0.009062747	5	0.04	2.5	Seasonality	Low
-0.03192118	-0.03323532	5	0.04	2.5	Seasonality	Low
-0.05665278	-0.05658961	5	0.04	2.5	Seasonality	Low
-0.01819249	-0.02033978	5	0.04	2.5	Seasonality	Low
-0.007031578	-0.01398048	5	0.04	2.5	Seasonality	Low
0.002448994	-0.0007750002	5	0.04	2.5	Seasonality	Low
-0.004039333	0.001092623	5	0.04	2.5	Seasonality	Low
-0.03755004	-0.03852513	5	0.04	2.5	Seasonality	Low
-0.02989415	-0.02298223	5	0.04	2.5	Seasonality	Low
-0.002464484	0.004627339	5	0.04	2.5	Seasonality	Low
-0.04940302	-0.05170712	5	0.04	2.5	Seasonality	Low
-0.02858593	-0.0238462	5	0.04	2.5	Seasonality	Low
0.009785006	0.004966115	5	0.04	2.5	Seasonality	Low
-0.008267987	-0.001607242	5	0.04	2.5	Seasonality	Low
-0.04149283	-0.04976465	5	0.04	2.5	Seasonality	Low
0.001966945	-0.002458859	5	0.04	2.5	Seasonality	Low
-0.02614076	-0.02381955	5	0.04	2.5	Seasonality	Low
-0.04818884	-0.0492346	5	0.04	2.5	Seasonality	Low
-0.06261756	-0.06328666	5	0.04	2.5	Seasonality	Low
-0.05069881	-0.05933833	5	0.04	2.5	Seasonality	Low
-0.05008509	-0.05552689	5	0.04	2.5	Seasonality	Low
-0.04556068	-0.05355568	5	0.04	2.5	Seasonality	Low
0.03197998	0.02566279	5	0.04	2.5	Seasonality	Low
-0.05435275	-0.0570124	5	0.04	2.5	Seasonality	Low
-0.04357824	-0.04441962	5	0.04	2.5	Seasonality	Low
-0.01825846	-0.02214099	5	0.04	2.5	Seasonality	Low
-0.02347584	-0.02815675	5	0.04	2.5	Seasonality	Low
-0.05615666	-0.05618856	5	0.04	2.5	Seasonality	Low
-0.02097575	-0.01305495	5	0.04	2.5	Seasonality	Low
-0.03117196	-0.04024645	5	0.04	2.5	Seasonality	Low
-0.05294804	-0.05301545	5	0.04	2.5	Seasonality	Low
-0.02899616	-0.03075367	5	0.04	2.5	Seasonality	Low
0.00334266	0.0008351118	5	0.04	2.5	Seasonality	Low
-0.04664457	-0.04026869	5	0.04	2.5	Seasonality	Low
-0.01385413	-0.007456103	5	0.04	2.5	Seasonality	Low
-0.02401481	-0.02444521	5	0.04	2.5	Seasonality	Low
-0.0552647	-0.05428286	5	0.04	2.5	Seasonality	Low
0.004999922	-0.003719662	5	0.04	2.5	Seasonality	Low
-0.001880547	0.002486249	5	0.04	2.5	Seasonality	Low
-0.04604094	-0.05040341	5	0.04	2.5	Seasonality	Low
-0.0289409	-0.02610279	5	0.04	2.5	Seasonality	Low
-0.03936389	-0.04411948	5	0.04	2.5	Seasonality	Low
-0.05029652	-0.04920644	5	0.04	2.5	Seasonality	Low
-0.03932433	-0.04682311	5	0.04	2.5	Seasonality	Low
-0.0360886	-0.04534711	5	0.04	2.5	Seasonality	Low
-0.04854268	-0.04654756	5	0.04	2.5	Seasonality	Low
-0.04012594	-0.04001364	5	0.04	2.5	Seasonality	Low
-0.02073178	-0.01495957	5	0.04	2.5	Seasonality	Low
-0.03749753	-0.04268574	5	0.04	2.5	Seasonality	Low
-0.001468578	0.001501866	5	0.04	2.5	Seasonality	Low
-0.02121674	-0.01327347	5	0.04	2.5	Seasonality	Low
-0.04852146	-0.05604772	5	0.04	2.5	Seasonality	Low
0.01139526	0.005679969	5	0.04	2.5	Seasonality	Low
-0.03606187	-0.02588496	5	0.04	2.5	Seasonality	Low
0.0006203655	-0.009870047	5	0.04	2.5	Seasonality	Low
-0.02400255	-0.02247675	5	0.04	2.5	Seasonality	Low
-0.04502434	-0.04006504	5	0.04	2.5	Seasonality	Low
-0.05655681	-0.0552337	10	0.04	2.5	Seasonality	Low
-0.03397157	-0.02748807	10	0.04	2.5	Seasonality	Low
-0.02035023	-0.01347289	10	0.04	2.5	Seasonality	Low
-0.004368571	-0.003927744	10	0.04	2.5	Seasonality	Low
0.002637236	-0.002078023	10	0.04	2.5	Seasonality	Low
-0.0540974	-0.05463742	10	0.04	2.5	Seasonality	Low
-0.04249368	-0.04570309	10	0.04	2.5	Seasonality	Low
-0.04885778	-0.04581611	10	0.04	2.5	Seasonality	Low
-0.04778233	-0.04665396	10	0.04	2.5	Seasonality	Low
-0.01738086	-0.01605426	10	0.04	2.5	Seasonality	Low
-0.01184425	-0.005714008	10	0.04	2.5	Seasonality	Low
-0.03810626	-0.03445219	10	0.04	2.5	Seasonality	Low
-0.04954222	-0.04989885	10	0.04	2.5	Seasonality	Low
-0.05992745	-0.06562434	10	0.04	2.5	Seasonality	Low
-0.03023343	-0.03245874	10	0.04	2.5	Seasonality	Low
-0.06095094	-0.06181272	10	0.04	2.5	Seasonality	Low
-0.05253373	-0.05085349	10	0.04	2.5	Seasonality	Low
-0.01572459	-0.02029148	10	0.04	2.5	Seasonality	Low
-0.04161597	-0.04701527	10	0.04	2.5	Seasonality	Low
-0.02516358	-0.0239767	10	0.04	2.5	Seasonality	Low
-0.02057645	-0.02144239	10	0.04	2.5	Seasonality	Low
-0.0231615	-0.02339957	10	0.04	2.5	Seasonality	Low
-0.03301521	-0.03260577	10	0.04	2.5	Seasonality	Low
-0.03138341	-0.03192496	10	0.04	2.5	Seasonality	Low
-0.06241979	-0.05450784	10	0.04	2.5	Seasonality	Low
-0.006672851	-0.004811509	10	0.04	2.5	Seasonality	Low
-0.0390175	-0.04360278	10	0.04	2.5	Seasonality	Low
0.0002945695	-0.002333614	10	0.04	2.5	Seasonality	Low
-0.0009157835	-0.002450413	10	0.04	2.5	Seasonality	Low
-0.028349	-0.03179786	10	0.04	2.5	Seasonality	Low
-0.02782792	-0.02597821	500	0.04	2.5	Seasonality	Low
-0.08714428	-0.08505601	500	0.04	2.5	Seasonality	Low
0.002045946	-0.0004329219	500	0.04	2.5	Seasonality	Low
-0.05102987	-0.04984038	500	0.04	2.5	Seasonality	Low
-0.07571011	-0.0724875	500	0.04	2.5	Seasonality	Low
-0.02843401	-0.0308081	500	0.04	2.5	Seasonality	Low
-0.05926415	-0.06278281	500	0.04	2.5	Seasonality	Low
-0.01618966	-0.01560624	500	0.04	2.5	Seasonality	Low
-0.05488044	-0.05322709	500	0.04	2.5	Seasonality	Low
-0.009955832	-0.01352415	500	0.04	2.5	Seasonality	Low
-0.03857167	-0.03964272	500	0.04	2.5	Seasonality	Low
-0.07757826	-0.08089758	500	0.04	2.5	Seasonality	Low
-0.02026816	-0.02085141	500	0.04	2.5	Seasonality	Low
-0.02425626	-0.02482646	500	0.04	2.5	Seasonality	Low
-0.01377175	-0.01045038	500	0.04	2.5	Seasonality	Low
-0.07014369	-0.07060228	500	0.04	2.5	Seasonality	Low
-0.04154079	-0.03951625	500	0.04	2.5	Seasonality	Low
0.00684408	0.009926679	500	0.04	2.5	Seasonality	Low
-0.06546467	-0.06297712	500	0.04	2.5	Seasonality	Low
-0.0189973	-0.01406827	500	0.04	2.5	Seasonality	Low
-0.01953749	-0.02358862	500	0.04	2.5	Seasonality	Low
-0.03230012	-0.03195114	500	0.04	2.5	Seasonality	Low
-0.06220823	-0.05999176	500	0.04	2.5	Seasonality	Low
-0.09084275	-0.07680966	500	0.04	2.5	Seasonality	Low
-0.05113214	-0.04639676	500	0.04	2.5	Seasonality	Low
-0.02071924	-0.02012099	500	0.04	2.5	Seasonality	Low
-0.07268697	-0.07433763	500	0.04	2.5	Seasonality	Low
-0.00805048	-0.006764344	500	0.04	2.5	Seasonality	Low
-0.02434403	-0.02144255	500	0.04	2.5	Seasonality	Low
-0.03567006	-0.03059999	500	0.04	2.5	Seasonality	Low
-0.01281382	-0.009350326	5	0.04	10	Seasonality	Low
0.02165015	0.02148102	5	0.04	10	Seasonality	Low
0.04704735	0.04785599	5	0.04	10	Seasonality	Low
-0.01329379	-0.01261105	5	0.04	10	Seasonality	Low
-0.008196115	-0.004121176	5	0.04	10	Seasonality	Low
-0.0004255258	0.0007422553	5	0.04	10	Seasonality	Low
0.03026485	0.02451802	5	0.04	10	Seasonality	Low
0.04417704	0.03938668	5	0.04	10	Seasonality	Low
0.06130961	0.04990367	5	0.04	10	Seasonality	Low
0.03402704	0.03596754	5	0.04	10	Seasonality	Low
0.01047645	0.005082799	5	0.04	10	Seasonality	Low
0.05085204	0.04877532	5	0.04	10	Seasonality	Low
-0.0175551	-0.01596781	5	0.04	10	Seasonality	Low
-0.00242458	0.006297656	5	0.04	10	Seasonality	Low
0.03213384	0.03115191	5	0.04	10	Seasonality	Low
0.04471387	0.04179459	5	0.04	10	Seasonality	Low
0.003817236	0.002531886	5	0.04	10	Seasonality	Low
0.03972739	0.03941704	5	0.04	10	Seasonality	Low
0.01723772	0.01658233	5	0.04	10	Seasonality	Low
0.001183139	0.002778209	5	0.04	10	Seasonality	Low
-0.003703432	-0.01124695	5	0.04	10	Seasonality	Low
0.01391178	0.008104488	5	0.04	10	Seasonality	Low
-0.005656751	0.0008165455	5	0.04	10	Seasonality	Low
0.04406422	0.04768	5	0.04	10	Seasonality	Low
0.03777636	0.03838531	5	0.04	10	Seasonality	Low
0.01392021	0.005363001	5	0.04	10	Seasonality	Low
0.006517368	0.004262657	5	0.04	10	Seasonality	Low
-0.01850115	-0.0139956	5	0.04	10	Seasonality	Low
0.007779026	0.01011065	5	0.04	10	Seasonality	Low
0.02322037	0.02079139	5	0.04	10	Seasonality	Low
0.02024945	0.01687637	5	0.04	10	Seasonality	Low
0.03778615	0.03963434	5	0.04	10	Seasonality	Low
0.003224648	0.002353888	5	0.04	10	Seasonality	Low
0.02254902	0.02114697	5	0.04	10	Seasonality	Low
0.01480314	0.01790904	5	0.04	10	Seasonality	Low
0.01876647	0.02184432	5	0.04	10	Seasonality	Low
-0.008025377	-0.01455695	5	0.04	10	Seasonality	Low
-0.001743523	-0.005296953	5	0.04	10	Seasonality	Low
-0.007569543	-0.01156461	5	0.04	10	Seasonality	Low
0.02265035	0.0288873	5	0.04	10	Seasonality	Low
0.003516903	0.008771136	5	0.04	10	Seasonality	Low
-0.005267948	-0.003260791	5	0.04	10	Seasonality	Low
-0.001818041	-0.0009108901	5	0.04	10	Seasonality	Low
-0.0173531	-0.01886867	5	0.04	10	Seasonality	Low
-0.01008196	-0.01294725	5	0.04	10	Seasonality	Low
0.03275639	0.02674708	5	0.04	10	Seasonality	Low
-0.005086927	-0.00305186	5	0.04	10	Seasonality	Low
0.01558262	0.01483635	5	0.04	10	Seasonality	Low
0.004464586	0.005357299	5	0.04	10	Seasonality	Low
0.02556587	0.02017279	5	0.04	10	Seasonality	Low
-0.02116639	-0.01852239	5	0.04	10	Seasonality	Low
-0.006702295	-0.002601666	5	0.04	10	Seasonality	Low
-0.00231977	-0.007583834	5	0.04	10	Seasonality	Low
0.012139	0.007721437	5	0.04	10	Seasonality	Low
-0.01352304	-0.008004748	5	0.04	10	Seasonality	Low
0.04275669	0.03651986	5	0.04	10	Seasonality	Low
-0.008303513	-0.004825154	5	0.04	10	Seasonality	Low
0.04971939	0.04919676	5	0.04	10	Seasonality	Low
0.04647007	0.03903233	5	0.04	10	Seasonality	Low
-0.01184676	-0.01590465	5	0.04	10	Seasonality	Low
-0.02080161	-0.01797556	5	0.04	10	Seasonality	Low
-0.00672716	-0.01293276	5	0.04	10	Seasonality	Low
-0.01268665	-0.01590956	5	0.04	10	Seasonality	Low
-0.01495173	-0.01812754	5	0.04	10	Seasonality	Low
-0.01745113	-0.01480424	5	0.04	10	Seasonality	Low
-0.003184571	0.0006165259	5	0.04	10	Seasonality	Low
0.03095037	0.0359531	5	0.04	10	Seasonality	Low
0.0375917	0.03648255	5	0.04	10	Seasonality	Low
0.007452409	0.007776076	5	0.04	10	Seasonality	Low
0.01939087	0.02082356	5	0.04	10	Seasonality	Low
-0.02466877	-0.0346827	10	0.04	10	Seasonality	Low
-0.02748556	-0.0271819	10	0.04	10	Seasonality	Low
0.02688867	0.02549599	10	0.04	10	Seasonality	Low
-0.02713364	-0.02390413	10	0.04	10	Seasonality	Low
-0.01746989	-0.01696026	10	0.04	10	Seasonality	Low
-0.01752765	-0.01934576	10	0.04	10	Seasonality	Low
0.03651789	0.03676983	10	0.04	10	Seasonality	Low
-0.01420464	-0.01451795	10	0.04	10	Seasonality	Low
-0.007034559	-0.003468402	10	0.04	10	Seasonality	Low
0.02427032	0.0335234	10	0.04	10	Seasonality	Low
0.02304029	0.02021493	10	0.04	10	Seasonality	Low
0.0256063	0.02757795	10	0.04	10	Seasonality	Low
0.0004227691	0.00191959	10	0.04	10	Seasonality	Low
0.02798011	0.02706139	10	0.04	10	Seasonality	Low
0.001125275	0.005326543	10	0.04	10	Seasonality	Low
0.0185122	0.01607645	10	0.04	10	Seasonality	Low
0.02155433	0.01691873	10	0.04	10	Seasonality	Low
0.0004799092	0.0005473557	10	0.04	10	Seasonality	Low
0.03901013	0.04588198	10	0.04	10	Seasonality	Low
-0.03634195	-0.02891979	10	0.04	10	Seasonality	Low
0.02179051	0.01749379	10	0.04	10	Seasonality	Low
-0.01014122	-0.01114342	10	0.04	10	Seasonality	Low
-0.01367769	-0.009336322	10	0.04	10	Seasonality	Low
-0.0001244034	0.002824332	10	0.04	10	Seasonality	Low
-0.007317383	-0.004272788	10	0.04	10	Seasonality	Low
0.03405446	0.03698219	10	0.04	10	Seasonality	Low
-0.01897915	-0.01975267	10	0.04	10	Seasonality	Low
0.02052697	0.02683048	10	0.04	10	Seasonality	Low
-0.004524431	-0.001576787	10	0.04	10	Seasonality	Low
-0.0160404	-0.01825239	10	0.04	10	Seasonality	Low
0.0116029	0.01088394	500	0.04	10	Seasonality	Low
0.02154212	0.01741831	500	0.04	10	Seasonality	Low
0.03835872	0.03586416	500	0.04	10	Seasonality	Low
0.03744835	0.03688822	500	0.04	10	Seasonality	Low
-0.02365076	-0.0226875	500	0.04	10	Seasonality	Low
-0.02490678	-0.02440831	500	0.04	10	Seasonality	Low
0.02779139	0.02412645	500	0.04	10	Seasonality	Low
0.03934699	0.04040451	500	0.04	10	Seasonality	Low
-0.02731509	-0.02847103	500	0.04	10	Seasonality	Low
-0.01010242	-0.008454348	500	0.04	10	Seasonality	Low
0.02892423	0.03160899	500	0.04	10	Seasonality	Low
-0.01251479	-0.01232855	500	0.04	10	Seasonality	Low
0.0009514157	0.0005678152	500	0.04	10	Seasonality	Low
0.002700169	0.003076916	500	0.04	10	Seasonality	Low
-0.03760898	-0.02754546	500	0.04	10	Seasonality	Low
-0.05262139	-0.05484388	500	0.04	10	Seasonality	Low
0.007075358	0.009139197	500	0.04	10	Seasonality	Low
-0.009678549	-0.01139754	500	0.04	10	Seasonality	Low
0.0002516212	0.001993974	500	0.04	10	Seasonality	Low
-0.04880565	-0.05186645	500	0.04	10	Seasonality	Low
-0.04165835	-0.04101584	500	0.04	10	Seasonality	Low
0.01746117	0.0155835	500	0.04	10	Seasonality	Low
-0.02727926	-0.02638849	500	0.04	10	Seasonality	Low
-0.04311023	-0.04388372	500	0.04	10	Seasonality	Low
-0.04810294	-0.04814904	500	0.04	10	Seasonality	Low
-0.02312985	-0.02177382	500	0.04	10	Seasonality	Low
-0.02855952	-0.02720277	500	0.04	10	Seasonality	Low
0.03698251	0.03780485	500	0.04	10	Seasonality	Low
-0.01788444	-0.01597652	500	0.04	10	Seasonality	Low
0.008391958	0.009991473	500	0.04	10	Seasonality	Low
-0.06064777	-0.05800768	5	0.04	2.5	Seasonality	High
-0.02751586	-0.02000185	5	0.04	2.5	Seasonality	High
-0.02204274	-0.0198656	5	0.04	2.5	Seasonality	High
-0.04148325	-0.03395991	5	0.04	2.5	Seasonality	High
-0.0546012	-0.04959066	5	0.04	2.5	Seasonality	High
-0.04137521	-0.03832413	5	0.04	2.5	Seasonality	High
-0.02470808	-0.02180169	5	0.04	2.5	Seasonality	High
-0.04004027	-0.04449069	5	0.04	2.5	Seasonality	High
-0.02834331	-0.03750873	5	0.04	2.5	Seasonality	High
-0.03807536	-0.03687749	5	0.04	2.5	Seasonality	High
-0.008166187	-0.006752701	5	0.04	2.5	Seasonality	High
-0.02592032	-0.02898129	5	0.04	2.5	Seasonality	High
-0.0274462	-0.02564298	5	0.04	2.5	Seasonality	High
-0.04408557	-0.04010985	5	0.04	2.5	Seasonality	High
-0.03285016	-0.03663844	5	0.04	2.5	Seasonality	High
-0.02371866	-0.02689538	5	0.04	2.5	Seasonality	High
-0.0515372	-0.0504689	5	0.04	2.5	Seasonality	High
-0.04845524	-0.05546964	5	0.04	2.5	Seasonality	High
-0.01523584	-0.01726968	5	0.04	2.5	Seasonality	High
-0.03791972	-0.04022785	5	0.04	2.5	Seasonality	High
-0.0009040442	-0.006288635	5	0.04	2.5	Seasonality	High
-0.05545919	-0.05004603	5	0.04	2.5	Seasonality	High
-0.02962238	-0.0336538	5	0.04	2.5	Seasonality	High
-0.003556835	-0.009199277	5	0.04	2.5	Seasonality	High
0.002335199	-0.002436128	5	0.04	2.5	Seasonality	High
-0.01793068	-0.01650123	5	0.04	2.5	Seasonality	High
-0.05017092	-0.04478112	5	0.04	2.5	Seasonality	High
0.002369913	0.001316907	5	0.04	2.5	Seasonality	High
-0.02275752	-0.02436096	5	0.04	2.5	Seasonality	High
-0.0578958	-0.05301679	5	0.04	2.5	Seasonality	High
-0.05696398	-0.05684721	5	0.04	2.5	Seasonality	High
-0.06125394	-0.05547693	5	0.04	2.5	Seasonality	High
-0.01351155	-0.01627201	5	0.04	2.5	Seasonality	High
-0.06132728	-0.05776019	5	0.04	2.5	Seasonality	High
-0.0445627	-0.04938694	5	0.04	2.5	Seasonality	High
-0.05421102	-0.05861022	5	0.04	2.5	Seasonality	High
-0.05867756	-0.05629616	5	0.04	2.5	Seasonality	High
-0.05151864	-0.0416391	5	0.04	2.5	Seasonality	High
-0.006246741	-0.006289194	5	0.04	2.5	Seasonality	High
-0.02764999	-0.02538912	5	0.04	2.5	Seasonality	High
-0.03640929	-0.03245623	5	0.04	2.5	Seasonality	High
-0.03833589	-0.04322161	5	0.04	2.5	Seasonality	High
-0.01205611	-0.008299661	5	0.04	2.5	Seasonality	High
-0.04032477	-0.0395204	5	0.04	2.5	Seasonality	High
-0.0486358	-0.04203879	5	0.04	2.5	Seasonality	High
0.0084879	-0.0001832691	5	0.04	2.5	Seasonality	High
-0.0350489	-0.04015718	5	0.04	2.5	Seasonality	High
-0.05610172	-0.05617523	5	0.04	2.5	Seasonality	High
-0.03352552	-0.0284331	5	0.04	2.5	Seasonality	High
-0.04961528	-0.05234289	5	0.04	2.5	Seasonality	High
-0.02976383	-0.03357195	10	0.04	2.5	Seasonality	High
-0.0238339	-0.02148767	10	0.04	2.5	Seasonality	High
-0.002227905	-0.005255424	10	0.04	2.5	Seasonality	High
-0.001429645	-0.00222909	10	0.04	2.5	Seasonality	High
1.520826e-05	-0.006504907	10	0.04	2.5	Seasonality	High
0.0001737838	-0.003729574	10	0.04	2.5	Seasonality	High
-0.04225762	-0.03987797	10	0.04	2.5	Seasonality	High
-0.04336915	-0.04601794	10	0.04	2.5	Seasonality	High
-0.05076792	-0.0457956	10	0.04	2.5	Seasonality	High
-0.0139954	-0.01703029	10	0.04	2.5	Seasonality	High
-0.01092033	-0.01281608	10	0.04	2.5	Seasonality	High
-0.005012922	-0.003926761	10	0.04	2.5	Seasonality	High
-0.04911787	-0.04962601	10	0.04	2.5	Seasonality	High
-0.005735786	-0.007495389	10	0.04	2.5	Seasonality	High
-0.05003069	-0.04586064	10	0.04	2.5	Seasonality	High
-0.02556147	-0.02751781	10	0.04	2.5	Seasonality	High
-0.005550429	-0.005981114	10	0.04	2.5	Seasonality	High
-0.04034158	-0.03994214	10	0.04	2.5	Seasonality	High
-0.03675271	-0.03793005	10	0.04	2.5	Seasonality	High
-0.06415514	-0.06276553	10	0.04	2.5	Seasonality	High
0.005412936	-0.006124677	10	0.04	2.5	Seasonality	High
-0.02541756	-0.02734967	10	0.04	2.5	Seasonality	High
-0.04719397	-0.05179633	10	0.04	2.5	Seasonality	High
-0.04219384	-0.04432003	10	0.04	2.5	Seasonality	High
-0.07043794	-0.06846516	10	0.04	2.5	Seasonality	High
-0.03950317	-0.04884083	10	0.04	2.5	Seasonality	High
-0.01533156	-0.01944569	10	0.04	2.5	Seasonality	High
-0.07144178	-0.06894229	10	0.04	2.5	Seasonality	High
-0.06607118	-0.06849035	10	0.04	2.5	Seasonality	High
-0.03629981	-0.04024392	10	0.04	2.5	Seasonality	High
0.01264026	0.01209305	500	0.04	2.5	Seasonality	High
-0.08526334	-0.08643657	500	0.04	2.5	Seasonality	High
0.002068951	0.0009997308	500	0.04	2.5	Seasonality	High
-0.03742406	-0.03495302	500	0.04	2.5	Seasonality	High
-0.05374699	-0.05507778	500	0.04	2.5	Seasonality	High
-0.01646562	-0.01800022	500	0.04	2.5	Seasonality	High
-0.03665632	-0.03457195	500	0.04	2.5	Seasonality	High
-0.000352649	-0.0006503248	500	0.04	2.5	Seasonality	High
0.01062564	0.01138691	500	0.04	2.5	Seasonality	High
-0.06699471	-0.06548168	500	0.04	2.5	Seasonality	High
-0.03375872	-0.03489846	500	0.04	2.5	Seasonality	High
-0.0007578303	-0.002269059	500	0.04	2.5	Seasonality	High
-0.0309996	-0.03117742	500	0.04	2.5	Seasonality	High
-0.04682181	-0.0469953	500	0.04	2.5	Seasonality	High
-0.06231237	-0.06283242	500	0.04	2.5	Seasonality	High
-0.08086956	-0.07445432	500	0.04	2.5	Seasonality	High
-0.04233375	-0.04552375	500	0.04	2.5	Seasonality	High
-0.03340255	-0.03296738	500	0.04	2.5	Seasonality	High
-0.07461217	-0.06961265	500	0.04	2.5	Seasonality	High
-0.02260559	-0.02100451	500	0.04	2.5	Seasonality	High
-0.05741778	-0.05483049	500	0.04	2.5	Seasonality	High
-0.01540948	-0.01750674	500	0.04	2.5	Seasonality	High
-0.04066534	-0.04049584	500	0.04	2.5	Seasonality	High
-0.005541582	-0.006734347	500	0.04	2.5	Seasonality	High
-0.03988661	-0.04151729	500	0.04	2.5	Seasonality	High
-0.02540826	-0.02858993	500	0.04	2.5	Seasonality	High
-0.07173474	-0.07113714	500	0.04	2.5	Seasonality	High
-0.08346695	-0.07836707	500	0.04	2.5	Seasonality	High
0.001666674	0.0018364	500	0.04	2.5	Seasonality	High
-0.06653357	-0.06139386	500	0.04	2.5	Seasonality	High
0.03412133	0.0300129	5	0.04	10	Seasonality	High
0.02959236	0.02347596	5	0.04	10	Seasonality	High
0.04559245	0.04359529	5	0.04	10	Seasonality	High
-0.01676734	-0.01557524	5	0.04	10	Seasonality	High
0.0405164	0.04157444	5	0.04	10	Seasonality	High
-0.00913142	0.003753752	5	0.04	10	Seasonality	High
-0.001650858	-0.003812746	5	0.04	10	Seasonality	High
0.04605556	0.04773991	5	0.04	10	Seasonality	High
0.03101176	0.03260527	5	0.04	10	Seasonality	High
0.02357663	0.02206798	5	0.04	10	Seasonality	High
0.03065802	0.04293902	5	0.04	10	Seasonality	High
-0.01986067	-0.0240464	5	0.04	10	Seasonality	High
0.01015302	0.01724631	5	0.04	10	Seasonality	High
0.04694117	0.03905522	5	0.04	10	Seasonality	High
-0.00711048	-0.005734335	5	0.04	10	Seasonality	High
-0.02173251	-0.01476637	5	0.04	10	Seasonality	High
0.02310972	0.02481768	5	0.04	10	Seasonality	High
0.009405827	0.009885502	5	0.04	10	Seasonality	High
-0.006465704	-0.006594096	5	0.04	10	Seasonality	High
0.03221274	0.02936024	5	0.04	10	Seasonality	High
0.01324077	0.009224272	5	0.04	10	Seasonality	High
0.0479124	0.03818021	5	0.04	10	Seasonality	High
-1.385444e-07	-0.008942483	5	0.04	10	Seasonality	High
0.01112212	0.01192973	5	0.04	10	Seasonality	High
0.004171372	0.004496815	5	0.04	10	Seasonality	High
-0.00116055	-0.005388325	5	0.04	10	Seasonality	High
-0.005908869	-0.01524822	5	0.04	10	Seasonality	High
0.00606298	0.006036736	5	0.04	10	Seasonality	High
0.004148799	0.006036701	5	0.04	10	Seasonality	High
0.01912989	0.01520481	5	0.04	10	Seasonality	High
0.01146953	0.01565594	5	0.04	10	Seasonality	High
0.0409033	0.03124688	5	0.04	10	Seasonality	High
-0.02141775	-0.01342842	5	0.04	10	Seasonality	High
-0.02209307	-0.02191758	5	0.04	10	Seasonality	High
-0.009305428	-0.0132401	5	0.04	10	Seasonality	High
-0.02114431	-0.01559077	5	0.04	10	Seasonality	High
-0.005306437	-0.00411912	5	0.04	10	Seasonality	High
0.05518411	0.0484223	5	0.04	10	Seasonality	High
-0.01429791	-0.0170947	5	0.04	10	Seasonality	High
0.004582921	0.01088097	5	0.04	10	Seasonality	High
0.01439746	0.01172758	5	0.04	10	Seasonality	High
0.04083682	0.04368485	5	0.04	10	Seasonality	High
-0.002422763	-0.006529187	5	0.04	10	Seasonality	High
-0.002442495	-0.005533736	5	0.04	10	Seasonality	High
-0.01113738	-0.01139838	5	0.04	10	Seasonality	High
-0.01068825	-0.008675868	5	0.04	10	Seasonality	High
-0.009449397	-0.006937197	5	0.04	10	Seasonality	High
-0.02108177	-0.02171185	5	0.04	10	Seasonality	High
-0.008480177	-0.003043058	5	0.04	10	Seasonality	High
-0.007121719	-0.004559885	5	0.04	10	Seasonality	High
-0.03701475	-0.02669696	5	0.04	10	Seasonality	High
-0.0110806	-0.01679081	5	0.04	10	Seasonality	High
0.00610628	0.003271874	5	0.04	10	Seasonality	High
-0.01158158	-0.01602815	5	0.04	10	Seasonality	High
0.001115106	-0.00359704	5	0.04	10	Seasonality	High
0.02016598	0.01574053	5	0.04	10	Seasonality	High
0.01327736	0.005479379	5	0.04	10	Seasonality	High
-0.007228525	-0.006790563	5	0.04	10	Seasonality	High
-0.02719157	-0.0260238	5	0.04	10	Seasonality	High
-0.009927154	-0.01680777	5	0.04	10	Seasonality	High
-0.01591838	-0.01248049	5	0.04	10	Seasonality	High
0.02402519	0.01988877	5	0.04	10	Seasonality	High
0.001276264	0.007558316	5	0.04	10	Seasonality	High
0.004433547	0.006128123	5	0.04	10	Seasonality	High
0.04221053	0.0360621	5	0.04	10	Seasonality	High
-0.00896809	-0.006728412	5	0.04	10	Seasonality	High
0.007858558	0.01019899	5	0.04	10	Seasonality	High
-0.01497501	-0.01225146	5	0.04	10	Seasonality	High
-0.01220251	-0.01079624	5	0.04	10	Seasonality	High
-0.04197198	-0.03383276	5	0.04	10	Seasonality	High
0.01231856	0.01303597	10	0.04	10	Seasonality	High
-0.02485195	-0.03103198	10	0.04	10	Seasonality	High
0.04587118	0.04176424	10	0.04	10	Seasonality	High
-0.05471918	-0.04621295	10	0.04	10	Seasonality	High
0.009950918	0.01046309	10	0.04	10	Seasonality	High
0.006146595	-0.002548942	10	0.04	10	Seasonality	High
0.008654102	0.01130008	10	0.04	10	Seasonality	High
-0.02789989	-0.03526307	10	0.04	10	Seasonality	High
0.01634309	0.01911272	10	0.04	10	Seasonality	High
0.03950211	0.03481961	10	0.04	10	Seasonality	High
-0.02876471	-0.03872313	10	0.04	10	Seasonality	High
0.0316404	0.02754943	10	0.04	10	Seasonality	High
-0.01048769	-0.01044252	10	0.04	10	Seasonality	High
-0.0004747824	-0.002657012	10	0.04	10	Seasonality	High
-0.01243013	-0.01967725	10	0.04	10	Seasonality	High
-0.02922176	-0.03317703	10	0.04	10	Seasonality	High
-0.05854696	-0.0546245	10	0.04	10	Seasonality	High
0.01535553	0.01010824	10	0.04	10	Seasonality	High
-0.02205783	-0.02686226	10	0.04	10	Seasonality	High
-0.006658524	-0.004014017	10	0.04	10	Seasonality	High
-0.01745414	-0.012511	10	0.04	10	Seasonality	High
-0.03381995	-0.03640789	10	0.04	10	Seasonality	High
-0.01116095	-0.00661347	10	0.04	10	Seasonality	High
-0.0003077079	0.004648565	10	0.04	10	Seasonality	High
-0.007769207	-0.007876818	10	0.04	10	Seasonality	High
0.0370146	0.02502066	10	0.04	10	Seasonality	High
-0.03177396	-0.03146893	10	0.04	10	Seasonality	High
0.02722444	0.02651879	10	0.04	10	Seasonality	High
0.0003386661	-0.007176875	10	0.04	10	Seasonality	High
-0.02776441	-0.02796079	10	0.04	10	Seasonality	High
-0.03413242	-0.03504129	10	0.04	10	Seasonality	High
-0.02754772	-0.0332613	10	0.04	10	Seasonality	High
-0.03950994	-0.03637095	10	0.04	10	Seasonality	High
-0.03884071	-0.04394532	10	0.04	10	Seasonality	High
-0.007090824	-0.01289602	10	0.04	10	Seasonality	High
-0.02623115	-0.02921986	10	0.04	10	Seasonality	High
-0.0294764	-0.03083204	10	0.04	10	Seasonality	High
-0.02363118	-0.02466987	10	0.04	10	Seasonality	High
-0.02772662	-0.02795216	10	0.04	10	Seasonality	High
0.001696137	-0.001861628	10	0.04	10	Seasonality	High
-0.02712831	-0.03799107	10	0.04	10	Seasonality	High
-0.01973185	-0.02058991	10	0.04	10	Seasonality	High
-0.0324453	-0.03811069	10	0.04	10	Seasonality	High
-0.02617643	-0.02770837	10	0.04	10	Seasonality	High
-0.03578473	-0.0333687	10	0.04	10	Seasonality	High
0.03061218	0.0346094	10	0.04	10	Seasonality	High
-0.01919601	-0.02873717	10	0.04	10	Seasonality	High
-0.02874087	-0.02511522	10	0.04	10	Seasonality	High
-0.03762934	-0.04159961	10	0.04	10	Seasonality	High
-0.03867717	-0.03750493	10	0.04	10	Seasonality	High
-0.02145619	-0.02934737	10	0.04	10	Seasonality	High
0.04227398	0.03859723	10	0.04	10	Seasonality	High
-0.03104732	-0.02860269	10	0.04	10	Seasonality	High
-0.00154808	0.0007706725	10	0.04	10	Seasonality	High
-0.04751465	-0.04055227	10	0.04	10	Seasonality	High
0.01888327	0.02114567	10	0.04	10	Seasonality	High
0.03072617	0.03569877	10	0.04	10	Seasonality	High
0.03403559	0.02816814	10	0.04	10	Seasonality	High
0.007872797	0.00858117	10	0.04	10	Seasonality	High
-0.004789085	-0.003427745	10	0.04	10	Seasonality	High
-0.005438445	-0.005936311	10	0.04	10	Seasonality	High
0.008525241	0.006670015	10	0.04	10	Seasonality	High
0.02554114	0.01946572	10	0.04	10	Seasonality	High
0.006363516	0.007551344	10	0.04	10	Seasonality	High
0.03178794	0.02818002	10	0.04	10	Seasonality	High
0.00711458	0.006976061	10	0.04	10	Seasonality	High
-0.01774315	-0.01555426	10	0.04	10	Seasonality	High
-0.02998247	-0.03469362	10	0.04	10	Seasonality	High
0.02713754	0.02534183	10	0.04	10	Seasonality	High
-0.05263718	-0.04826011	10	0.04	10	Seasonality	High
0.02702363	0.02834552	500	0.04	10	Seasonality	High
0.03835362	0.03740677	500	0.04	10	Seasonality	High
-0.0004333178	0.0007914328	500	0.04	10	Seasonality	High
-0.0113388	-0.008237052	500	0.04	10	Seasonality	High
-0.03399123	-0.03547377	500	0.04	10	Seasonality	High
0.007385416	0.007739076	500	0.04	10	Seasonality	High
-0.01023404	-0.008768117	500	0.04	10	Seasonality	High
0.03930475	0.03852695	500	0.04	10	Seasonality	High
0.01449551	0.0148028	500	0.04	10	Seasonality	High
-0.006978334	-0.007011516	500	0.04	10	Seasonality	High
-0.001153639	-0.004587977	500	0.04	10	Seasonality	High
0.0435594	0.04166409	500	0.04	10	Seasonality	High
0.01580054	0.01472634	500	0.04	10	Seasonality	High
0.04921289	0.04947653	500	0.04	10	Seasonality	High
0.005282588	0.006607071	500	0.04	10	Seasonality	High
0.005925852	0.005712689	500	0.04	10	Seasonality	High
-0.0549372	-0.05023833	500	0.04	10	Seasonality	High
-0.04172457	-0.03608479	500	0.04	10	Seasonality	High
-0.007484348	-0.00769864	500	0.04	10	Seasonality	High
0.01694582	0.01947204	500	0.04	10	Seasonality	High
0.04067824	0.04247268	500	0.04	10	Seasonality	High
-0.02398229	-0.02311687	500	0.04	10	Seasonality	High
-0.01629786	-0.02086049	500	0.04	10	Seasonality	High
-0.03613722	-0.03737583	500	0.04	10	Seasonality	High
0.03751449	0.03961804	500	0.04	10	Seasonality	High
-0.003947163	-0.005936445	500	0.04	10	Seasonality	High
0.0002917609	-0.006809147	500	0.04	10	Seasonality	High
0.02395073	0.02593886	500	0.04	10	Seasonality	High
0.02967104	0.03683596	500	0.04	10	Seasonality	High
-0.01338955	-0.02172049	500	0.04	10	Seasonality	High
