# Supplementary material for: The influence of biological, epidemiological, and treatment factors on the establishment and spread of drug-resistant Plasmodium falciparum
Source: eLife. 2022 Jul 7;11:e77634. doi: 10.7554/eLife.77634 (PMC9262398; doi:10.7554/eLife.77634)
Supplement: Appendix 1—figure 10—source data 1. [file elife-77634-app1-fig10-data1.csv]

Test_True	Test_predicted	Eir	Access_treatment	Resistance_level	Seasonality_pattern	Adherence_treatment
0.1101263	0.1003234	5	0.5	2.5	No seasonality	Low
0.008884088	0.01058165	5	0.5	2.5	No seasonality	Low
0.0438806	0.05049991	5	0.5	2.5	No seasonality	Low
0.04016284	0.05222547	5	0.5	2.5	No seasonality	Low
0.1147694	0.1164859	5	0.5	2.5	No seasonality	Low
0.009836435	0.01134111	5	0.5	2.5	No seasonality	Low
0.04723983	0.05263905	5	0.5	2.5	No seasonality	Low
0.06199704	0.05584655	5	0.5	2.5	No seasonality	Low
0.087487	0.08959335	5	0.5	2.5	No seasonality	Low
0.04075804	0.03566749	5	0.5	2.5	No seasonality	Low
0.07718802	0.07273278	5	0.5	2.5	No seasonality	Low
0.04098407	0.02891543	5	0.5	2.5	No seasonality	Low
0.05606314	0.05686268	5	0.5	2.5	No seasonality	Low
0.03516207	0.03284419	5	0.5	2.5	No seasonality	Low
0.0726434	0.07727037	5	0.5	2.5	No seasonality	Low
-0.005989155	-0.004437791	5	0.5	2.5	No seasonality	Low
0.0352544	0.04493838	5	0.5	2.5	No seasonality	Low
0.1475064	0.1612577	5	0.5	2.5	No seasonality	Low
0.07716891	0.07980274	5	0.5	2.5	No seasonality	Low
0.07816924	0.08045142	5	0.5	2.5	No seasonality	Low
0.05101437	0.05573269	5	0.5	2.5	No seasonality	Low
0.06387026	0.06347189	5	0.5	2.5	No seasonality	Low
0.02815412	0.0319228	5	0.5	2.5	No seasonality	Low
0.04216476	0.05426102	5	0.5	2.5	No seasonality	Low
0.07318104	0.06899251	5	0.5	2.5	No seasonality	Low
0.06351386	0.06478894	5	0.5	2.5	No seasonality	Low
0.03095193	0.03030484	5	0.5	2.5	No seasonality	Low
0.004150788	0.004095615	5	0.5	2.5	No seasonality	Low
0.02836219	0.029972	5	0.5	2.5	No seasonality	Low
0.03859219	0.03349614	5	0.5	2.5	No seasonality	Low
0.07053035	0.07198101	5	0.5	2.5	No seasonality	Low
0.03103534	0.02115891	5	0.5	2.5	No seasonality	Low
0.06454523	0.07254222	5	0.5	2.5	No seasonality	Low
0.01578424	0.01401843	5	0.5	2.5	No seasonality	Low
0.05877681	0.05015584	5	0.5	2.5	No seasonality	Low
0.08521397	0.07879739	5	0.5	2.5	No seasonality	Low
0.003598108	0.01635764	5	0.5	2.5	No seasonality	Low
5.164407e-05	0.01535403	5	0.5	2.5	No seasonality	Low
0.08281589	0.08691452	5	0.5	2.5	No seasonality	Low
0.1056377	0.1040589	5	0.5	2.5	No seasonality	Low
0.1071337	0.1000023	5	0.5	2.5	No seasonality	Low
0.2073896	0.2097461	5	0.5	2.5	No seasonality	Low
0.09091281	0.09015359	5	0.5	2.5	No seasonality	Low
0.05683312	0.05695031	5	0.5	2.5	No seasonality	Low
0.03773015	0.04129905	5	0.5	2.5	No seasonality	Low
0.1107297	0.1065867	5	0.5	2.5	No seasonality	Low
0.03027925	0.02578837	5	0.5	2.5	No seasonality	Low
0.03806572	0.03192208	5	0.5	2.5	No seasonality	Low
0.1428682	0.1206963	5	0.5	2.5	No seasonality	Low
0.02981149	0.03282092	5	0.5	2.5	No seasonality	Low
0.1972906	0.1892843	5	0.5	2.5	No seasonality	Low
0.01771161	0.02374858	5	0.5	2.5	No seasonality	Low
0.04482143	0.04828413	5	0.5	2.5	No seasonality	Low
0.03334781	0.03896564	5	0.5	2.5	No seasonality	Low
0.1049564	0.1038169	5	0.5	2.5	No seasonality	Low
0.110613	0.1304428	5	0.5	2.5	No seasonality	Low
-0.004006196	-0.005930895	5	0.5	2.5	No seasonality	Low
0.2423308	0.2505947	5	0.5	2.5	No seasonality	Low
0.02721802	0.02952446	5	0.5	2.5	No seasonality	Low
0.06309097	0.06830513	5	0.5	2.5	No seasonality	Low
0.03757997	0.03923292	5	0.5	2.5	No seasonality	Low
0.04233279	0.04723636	5	0.5	2.5	No seasonality	Low
0.07129048	0.07384392	5	0.5	2.5	No seasonality	Low
0.008667958	-0.002517914	5	0.5	2.5	No seasonality	Low
0.1161011	0.1171612	5	0.5	2.5	No seasonality	Low
0.1365591	0.1369739	5	0.5	2.5	No seasonality	Low
0.197757	0.1874266	5	0.5	2.5	No seasonality	Low
0.04436711	0.04590515	5	0.5	2.5	No seasonality	Low
0.0308356	0.02974059	5	0.5	2.5	No seasonality	Low
0.1074927	0.1036482	5	0.5	2.5	No seasonality	Low
0.06617314	0.06156088	10	0.5	2.5	No seasonality	Low
0.06738025	0.07468584	10	0.5	2.5	No seasonality	Low
0.1114707	0.1133719	10	0.5	2.5	No seasonality	Low
0.1019588	0.115141	10	0.5	2.5	No seasonality	Low
0.01894379	0.009267655	10	0.5	2.5	No seasonality	Low
0.01957962	0.01544195	10	0.5	2.5	No seasonality	Low
0.07260914	0.07285746	10	0.5	2.5	No seasonality	Low
0.06871013	0.07199808	10	0.5	2.5	No seasonality	Low
0.0629966	0.06807177	10	0.5	2.5	No seasonality	Low
0.02709905	0.03548581	10	0.5	2.5	No seasonality	Low
0.1027158	0.1091551	10	0.5	2.5	No seasonality	Low
0.0479004	0.04587302	10	0.5	2.5	No seasonality	Low
0.09172297	0.08249418	10	0.5	2.5	No seasonality	Low
0.08757324	0.07985031	10	0.5	2.5	No seasonality	Low
0.07724498	0.07707571	10	0.5	2.5	No seasonality	Low
0.1215878	0.1108995	10	0.5	2.5	No seasonality	Low
0.03869356	0.03815496	10	0.5	2.5	No seasonality	Low
0.04450864	0.02982589	10	0.5	2.5	No seasonality	Low
0.07927185	0.07351318	10	0.5	2.5	No seasonality	Low
0.06832586	0.06825005	10	0.5	2.5	No seasonality	Low
0.04244307	0.04398502	10	0.5	2.5	No seasonality	Low
0.145082	0.1444808	10	0.5	2.5	No seasonality	Low
0.08896118	0.0916517	10	0.5	2.5	No seasonality	Low
0.1130759	0.109999	10	0.5	2.5	No seasonality	Low
0.07326762	0.07414526	10	0.5	2.5	No seasonality	Low
0.04711373	0.05366092	10	0.5	2.5	No seasonality	Low
0.126754	0.1270587	10	0.5	2.5	No seasonality	Low
0.1031708	0.1044262	10	0.5	2.5	No seasonality	Low
0.2050945	0.1899993	10	0.5	2.5	No seasonality	Low
0.02655559	0.03281515	10	0.5	2.5	No seasonality	Low
0.07988587	0.08470303	10	0.5	2.5	No seasonality	Low
0.04100909	0.0471737	10	0.5	2.5	No seasonality	Low
0.0491042	0.04856481	10	0.5	2.5	No seasonality	Low
0.167321	0.160685	10	0.5	2.5	No seasonality	Low
0.08648333	0.08734805	10	0.5	2.5	No seasonality	Low
0.000890384	0.00273957	10	0.5	2.5	No seasonality	Low
0.1357821	0.1274755	10	0.5	2.5	No seasonality	Low
0.06390377	0.06657915	10	0.5	2.5	No seasonality	Low
0.122223	0.1145839	10	0.5	2.5	No seasonality	Low
0.1299928	0.1248832	10	0.5	2.5	No seasonality	Low
0.1742697	0.1625324	10	0.5	2.5	No seasonality	Low
0.06978249	0.07266115	10	0.5	2.5	No seasonality	Low
0.1210099	0.1241935	10	0.5	2.5	No seasonality	Low
0.09527648	0.0973232	10	0.5	2.5	No seasonality	Low
0.05737126	0.05893975	10	0.5	2.5	No seasonality	Low
0.1362268	0.1425427	10	0.5	2.5	No seasonality	Low
0.1268187	0.1261328	10	0.5	2.5	No seasonality	Low
0.08090797	0.08194167	10	0.5	2.5	No seasonality	Low
0.1275004	0.1315449	10	0.5	2.5	No seasonality	Low
0.06573311	0.06144225	10	0.5	2.5	No seasonality	Low
0.03694896	0.03366821	10	0.5	2.5	No seasonality	Low
0.01550842	0.01636763	10	0.5	2.5	No seasonality	Low
0.03213804	0.05842607	10	0.5	2.5	No seasonality	Low
0.08650537	0.08383484	10	0.5	2.5	No seasonality	Low
0.08902906	0.08803806	10	0.5	2.5	No seasonality	Low
-0.0129158	-0.01506026	10	0.5	2.5	No seasonality	Low
-0.02056545	-0.02410061	10	0.5	2.5	No seasonality	Low
0.123452	0.1326673	10	0.5	2.5	No seasonality	Low
0.09058765	0.09155625	10	0.5	2.5	No seasonality	Low
-0.01122283	-0.008635279	10	0.5	2.5	No seasonality	Low
0.06664406	0.06891133	10	0.5	2.5	No seasonality	Low
0.08138803	0.08595874	10	0.5	2.5	No seasonality	Low
0.1905622	0.1738917	10	0.5	2.5	No seasonality	Low
-0.02014775	-0.01373043	10	0.5	2.5	No seasonality	Low
0.07374601	0.06794395	10	0.5	2.5	No seasonality	Low
0.0963516	0.0911024	10	0.5	2.5	No seasonality	Low
0.05300768	0.0495155	10	0.5	2.5	No seasonality	Low
0.09134884	0.08149568	10	0.5	2.5	No seasonality	Low
0.1324496	0.1344981	10	0.5	2.5	No seasonality	Low
0.05797157	0.05800469	10	0.5	2.5	No seasonality	Low
0.09348489	0.09623836	500	0.5	2.5	No seasonality	Low
0.1082987	0.1136911	500	0.5	2.5	No seasonality	Low
0.06533804	0.06834666	500	0.5	2.5	No seasonality	Low
0.1859204	0.1858179	500	0.5	2.5	No seasonality	Low
0.1418915	0.1505022	500	0.5	2.5	No seasonality	Low
0.05733813	0.05269353	500	0.5	2.5	No seasonality	Low
0.0711037	0.07062431	500	0.5	2.5	No seasonality	Low
0.1975888	0.1921343	500	0.5	2.5	No seasonality	Low
0.05253069	0.05472045	500	0.5	2.5	No seasonality	Low
0.1160921	0.1164464	500	0.5	2.5	No seasonality	Low
0.1107848	0.1172399	500	0.5	2.5	No seasonality	Low
0.06670083	0.07662709	500	0.5	2.5	No seasonality	Low
0.1493489	0.1487515	500	0.5	2.5	No seasonality	Low
0.2027251	0.1924307	500	0.5	2.5	No seasonality	Low
0.1639474	0.1671985	500	0.5	2.5	No seasonality	Low
0.2077697	0.1852351	500	0.5	2.5	No seasonality	Low
0.1192794	0.1139342	500	0.5	2.5	No seasonality	Low
0.2250636	0.1975706	500	0.5	2.5	No seasonality	Low
0.07740328	0.08675171	500	0.5	2.5	No seasonality	Low
0.1587713	0.1583219	500	0.5	2.5	No seasonality	Low
0.09163558	0.09119594	500	0.5	2.5	No seasonality	Low
0.1244426	0.1243569	500	0.5	2.5	No seasonality	Low
0.1175954	0.1178644	500	0.5	2.5	No seasonality	Low
0.1572391	0.1160151	500	0.5	2.5	No seasonality	Low
0.09131725	0.08731919	500	0.5	2.5	No seasonality	Low
0.09860362	0.1020492	500	0.5	2.5	No seasonality	Low
0.1762965	0.1732007	500	0.5	2.5	No seasonality	Low
0.1731115	0.1665465	500	0.5	2.5	No seasonality	Low
0.1627902	0.1630592	500	0.5	2.5	No seasonality	Low
0.2240853	0.221844	500	0.5	2.5	No seasonality	Low
0.1694836	0.1696017	500	0.5	2.5	No seasonality	Low
0.1678145	0.1678418	500	0.5	2.5	No seasonality	Low
0.09131725	0.08731919	500	0.5	2.5	No seasonality	Low
0.1477791	0.1478631	500	0.5	2.5	No seasonality	Low
0.04363926	0.04885216	5	0.5	2.5	No seasonality	High
0.08374128	0.0866933	5	0.5	2.5	No seasonality	High
0.007917798	0.009485717	5	0.5	2.5	No seasonality	High
0.06011793	0.05726974	5	0.5	2.5	No seasonality	High
0.08123353	0.08058082	5	0.5	2.5	No seasonality	High
0.01492676	0.0136726	5	0.5	2.5	No seasonality	High
0.08269726	0.08798988	5	0.5	2.5	No seasonality	High
0.06146428	0.06506466	5	0.5	2.5	No seasonality	High
0.04426303	0.04190794	5	0.5	2.5	No seasonality	High
0.03322246	0.03164304	5	0.5	2.5	No seasonality	High
0.09217116	0.08656169	5	0.5	2.5	No seasonality	High
0.05509811	0.05834005	5	0.5	2.5	No seasonality	High
0.01709618	0.01699639	5	0.5	2.5	No seasonality	High
0.1018508	0.1061367	5	0.5	2.5	No seasonality	High
0.04188451	0.0483549	5	0.5	2.5	No seasonality	High
0.04472013	0.0421631	5	0.5	2.5	No seasonality	High
0.07351702	0.07560592	5	0.5	2.5	No seasonality	High
-0.003988532	-0.001251365	5	0.5	2.5	No seasonality	High
0.07771772	0.0796389	5	0.5	2.5	No seasonality	High
0.05454101	0.05773479	5	0.5	2.5	No seasonality	High
0.04542339	0.04711554	5	0.5	2.5	No seasonality	High
0.06232469	0.05406202	5	0.5	2.5	No seasonality	High
0.03208744	0.03487276	5	0.5	2.5	No seasonality	High
0.03575564	0.03711314	5	0.5	2.5	No seasonality	High
0.0325431	0.03352981	5	0.5	2.5	No seasonality	High
0.009676818	0.006386118	5	0.5	2.5	No seasonality	High
0.05216624	0.05158241	5	0.5	2.5	No seasonality	High
0.04216657	0.04313858	5	0.5	2.5	No seasonality	High
0.02751156	0.02640312	5	0.5	2.5	No seasonality	High
0.01350324	0.01336344	5	0.5	2.5	No seasonality	High
0.02065037	0.02453136	10	0.5	2.5	No seasonality	High
0.04692899	0.0475927	10	0.5	2.5	No seasonality	High
0.0731607	0.07555306	10	0.5	2.5	No seasonality	High
0.07355994	0.07342945	10	0.5	2.5	No seasonality	High
0.02552673	0.02679518	10	0.5	2.5	No seasonality	High
0.04962489	0.05022047	10	0.5	2.5	No seasonality	High
0.05329738	0.05379068	10	0.5	2.5	No seasonality	High
0.06392612	0.06451122	10	0.5	2.5	No seasonality	High
0.03866251	0.03839124	10	0.5	2.5	No seasonality	High
0.0469025	0.04538382	10	0.5	2.5	No seasonality	High
0.01116667	0.01150024	10	0.5	2.5	No seasonality	High
0.06940891	0.06944754	10	0.5	2.5	No seasonality	High
0.08903145	0.0903593	10	0.5	2.5	No seasonality	High
0.04006444	0.03921749	10	0.5	2.5	No seasonality	High
-0.008645735	-0.005210597	10	0.5	2.5	No seasonality	High
0.05766829	0.05792284	10	0.5	2.5	No seasonality	High
-0.001384284	-0.001613484	10	0.5	2.5	No seasonality	High
0.02663451	0.02809368	10	0.5	2.5	No seasonality	High
0.04791358	0.05012084	10	0.5	2.5	No seasonality	High
0.07526299	0.07556592	10	0.5	2.5	No seasonality	High
0.08913254	0.08883453	10	0.5	2.5	No seasonality	High
0.07018033	0.07256943	10	0.5	2.5	No seasonality	High
0.04221736	0.04287289	10	0.5	2.5	No seasonality	High
0.04447163	0.03729373	10	0.5	2.5	No seasonality	High
0.04029635	0.04096056	10	0.5	2.5	No seasonality	High
0.002671329	0.002270343	10	0.5	2.5	No seasonality	High
0.04786345	0.04824497	10	0.5	2.5	No seasonality	High
0.02699785	0.0229274	10	0.5	2.5	No seasonality	High
0.08401343	0.08319797	10	0.5	2.5	No seasonality	High
0.02784936	0.02941738	10	0.5	2.5	No seasonality	High
0.1071618	0.1077851	500	0.5	2.5	No seasonality	High
0.196414	0.1963291	500	0.5	2.5	No seasonality	High
0.06035222	0.05862857	500	0.5	2.5	No seasonality	High
0.04318854	0.04320707	500	0.5	2.5	No seasonality	High
0.1546614	0.1541173	500	0.5	2.5	No seasonality	High
0.08077676	0.08818997	500	0.5	2.5	No seasonality	High
0.1113007	0.1149557	500	0.5	2.5	No seasonality	High
0.1987393	0.1971334	500	0.5	2.5	No seasonality	High
0.112222	0.1098512	500	0.5	2.5	No seasonality	High
0.1512273	0.1509284	500	0.5	2.5	No seasonality	High
0.1690913	0.1647395	500	0.5	2.5	No seasonality	High
0.1779172	0.1807728	500	0.5	2.5	No seasonality	High
0.1658064	0.1688161	500	0.5	2.5	No seasonality	High
0.05961094	0.06611789	500	0.5	2.5	No seasonality	High
0.1484755	0.1483683	500	0.5	2.5	No seasonality	High
0.09654378	0.0996126	500	0.5	2.5	No seasonality	High
0.08742488	0.08417983	500	0.5	2.5	No seasonality	High
0.1591418	0.1634021	500	0.5	2.5	No seasonality	High
0.09915251	0.09768453	500	0.5	2.5	No seasonality	High
0.2301748	0.2206073	500	0.5	2.5	No seasonality	High
0.03560886	0.03868785	500	0.5	2.5	No seasonality	High
0.02297254	0.01816707	500	0.5	2.5	No seasonality	High
0.104498	0.1057896	500	0.5	2.5	No seasonality	High
0.08012226	0.07346102	500	0.5	2.5	No seasonality	High
0.02900342	0.02848426	500	0.5	2.5	No seasonality	High
0.126971	0.1269729	500	0.5	2.5	No seasonality	High
0.0670801	0.06619048	500	0.5	2.5	No seasonality	High
0.1679819	0.1676081	500	0.5	2.5	No seasonality	High
0.2215112	0.2110378	500	0.5	2.5	No seasonality	High
0.1737339	0.17332	500	0.5	2.5	No seasonality	High
0.1615391	0.1645733	500	0.5	2.5	No seasonality	High
0.1864292	0.1868739	500	0.5	2.5	No seasonality	High
0.1594477	0.1594452	500	0.5	2.5	No seasonality	High
0.06907944	0.06915156	500	0.5	2.5	No seasonality	High
0.02793069	0.02941893	5	0.5	2.5	Seasonality	Low
0.04690612	0.05672068	5	0.5	2.5	Seasonality	Low
0.0128766	0.01099967	5	0.5	2.5	Seasonality	Low
0.008651596	0.01253323	5	0.5	2.5	Seasonality	Low
0.02824534	0.02663774	5	0.5	2.5	Seasonality	Low
0.02847152	0.02438354	5	0.5	2.5	Seasonality	Low
0.03679741	0.04359541	5	0.5	2.5	Seasonality	Low
0.03642091	0.04112886	5	0.5	2.5	Seasonality	Low
0.02594928	0.02984293	5	0.5	2.5	Seasonality	Low
0.02164119	0.03120445	5	0.5	2.5	Seasonality	Low
0.04373088	0.03246138	5	0.5	2.5	Seasonality	Low
0.02323149	0.02697126	5	0.5	2.5	Seasonality	Low
0.05990266	0.05013282	5	0.5	2.5	Seasonality	Low
0.0669154	0.08436843	5	0.5	2.5	Seasonality	Low
0.03462609	0.03550366	5	0.5	2.5	Seasonality	Low
0.01472365	-0.01017468	5	0.5	2.5	Seasonality	Low
0.009228428	0.02697717	5	0.5	2.5	Seasonality	Low
0.06276133	0.0575817	5	0.5	2.5	Seasonality	Low
0.01946071	0.02018657	5	0.5	2.5	Seasonality	Low
0.05396594	0.05716435	5	0.5	2.5	Seasonality	Low
0.08614339	0.09057046	5	0.5	2.5	Seasonality	Low
0.05343381	0.06222955	5	0.5	2.5	Seasonality	Low
0.05577805	0.05722212	5	0.5	2.5	Seasonality	Low
0.02837529	0.03017227	5	0.5	2.5	Seasonality	Low
0.1248839	0.1322598	5	0.5	2.5	Seasonality	Low
0.01215372	0.01353679	5	0.5	2.5	Seasonality	Low
0.04842185	0.03503755	5	0.5	2.5	Seasonality	Low
0.05528749	0.0372163	5	0.5	2.5	Seasonality	Low
0.02302982	0.02953267	5	0.5	2.5	Seasonality	Low
0.3045328	0.3060334	5	0.5	2.5	Seasonality	Low
0.1252871	0.1574544	5	0.5	2.5	Seasonality	Low
0.05308409	0.05235655	5	0.5	2.5	Seasonality	Low
0.03051472	0.04406009	5	0.5	2.5	Seasonality	Low
0.03362521	0.02590138	5	0.5	2.5	Seasonality	Low
-0.01476452	0.01768591	5	0.5	2.5	Seasonality	Low
0.04732579	0.0357124	5	0.5	2.5	Seasonality	Low
0.04626754	0.05487194	5	0.5	2.5	Seasonality	Low
0.08144589	0.07393546	5	0.5	2.5	Seasonality	Low
0.07570521	0.07195328	5	0.5	2.5	Seasonality	Low
0.1991937	0.1516436	5	0.5	2.5	Seasonality	Low
0.00216317	0.01463888	5	0.5	2.5	Seasonality	Low
0.01722089	0.004370566	5	0.5	2.5	Seasonality	Low
0.3415158	0.3357073	5	0.5	2.5	Seasonality	Low
0.07917124	0.05924047	5	0.5	2.5	Seasonality	Low
0.06165035	0.06038409	5	0.5	2.5	Seasonality	Low
0.1082556	0.1322409	5	0.5	2.5	Seasonality	Low
0.04187341	0.04507642	5	0.5	2.5	Seasonality	Low
-0.002096348	0.003306879	5	0.5	2.5	Seasonality	Low
0.02713602	0.0346364	5	0.5	2.5	Seasonality	Low
0.1440516	0.1535837	5	0.5	2.5	Seasonality	Low
0.02709402	0.03748807	5	0.5	2.5	Seasonality	Low
0.03320641	0.03840146	5	0.5	2.5	Seasonality	Low
0.05103082	0.06742451	5	0.5	2.5	Seasonality	Low
0.1293648	0.09731864	5	0.5	2.5	Seasonality	Low
0.3586906	0.3504632	5	0.5	2.5	Seasonality	Low
0.06883551	0.068542	5	0.5	2.5	Seasonality	Low
0.0756786	0.1377919	5	0.5	2.5	Seasonality	Low
0.03509739	0.03106064	5	0.5	2.5	Seasonality	Low
0.05172307	0.04470991	5	0.5	2.5	Seasonality	Low
0.222832	0.2286144	5	0.5	2.5	Seasonality	Low
0.03944369	0.03853414	5	0.5	2.5	Seasonality	Low
0.2022147	0.1809737	5	0.5	2.5	Seasonality	Low
0.01219405	0.006792979	5	0.5	2.5	Seasonality	Low
0.06035642	0.04521928	5	0.5	2.5	Seasonality	Low
0.06052345	0.05129959	5	0.5	2.5	Seasonality	Low
0.05542722	0.06224609	5	0.5	2.5	Seasonality	Low
0.06470544	0.07295246	5	0.5	2.5	Seasonality	Low
0.01469566	0.02171645	5	0.5	2.5	Seasonality	Low
0.04915588	0.05356374	5	0.5	2.5	Seasonality	Low
0.06909683	0.06908372	5	0.5	2.5	Seasonality	Low
0.0759256	0.08469496	10	0.5	2.5	Seasonality	Low
0.01970826	0.02502036	10	0.5	2.5	Seasonality	Low
0.04960371	0.05402796	10	0.5	2.5	Seasonality	Low
0.07274339	0.06359449	10	0.5	2.5	Seasonality	Low
0.09655647	0.1046598	10	0.5	2.5	Seasonality	Low
0.01654282	0.02008286	10	0.5	2.5	Seasonality	Low
0.03804004	0.03460523	10	0.5	2.5	Seasonality	Low
0.04138863	0.04394581	10	0.5	2.5	Seasonality	Low
0.002259017	0.01062294	10	0.5	2.5	Seasonality	Low
0.06032537	0.05362595	10	0.5	2.5	Seasonality	Low
0.05608935	0.05885538	10	0.5	2.5	Seasonality	Low
0.06020754	0.05027938	10	0.5	2.5	Seasonality	Low
0.03175573	0.04341695	10	0.5	2.5	Seasonality	Low
0.09027121	0.08818319	10	0.5	2.5	Seasonality	Low
0.05883078	0.05739896	10	0.5	2.5	Seasonality	Low
0.06399179	0.07620648	10	0.5	2.5	Seasonality	Low
0.0270716	0.03796797	10	0.5	2.5	Seasonality	Low
0.02602299	0.02031138	10	0.5	2.5	Seasonality	Low
0.05963313	0.06425786	10	0.5	2.5	Seasonality	Low
0.06664377	0.06062479	10	0.5	2.5	Seasonality	Low
0.05159428	0.0477181	10	0.5	2.5	Seasonality	Low
0.04854547	0.04767552	10	0.5	2.5	Seasonality	Low
0.05045129	0.04610562	10	0.5	2.5	Seasonality	Low
0.05420071	0.0486508	10	0.5	2.5	Seasonality	Low
0.05032048	0.06404948	10	0.5	2.5	Seasonality	Low
0.2694082	0.2615097	10	0.5	2.5	Seasonality	Low
0.08894076	0.08741177	10	0.5	2.5	Seasonality	Low
0.02314343	0.03303276	10	0.5	2.5	Seasonality	Low
0.06137663	0.06153946	10	0.5	2.5	Seasonality	Low
0.09542761	0.1156808	10	0.5	2.5	Seasonality	Low
0.0706201	0.08032163	10	0.5	2.5	Seasonality	Low
0.06150122	0.05978907	10	0.5	2.5	Seasonality	Low
0.3077049	0.277964	10	0.5	2.5	Seasonality	Low
0.09640379	0.1024274	10	0.5	2.5	Seasonality	Low
0.2845878	0.2645838	10	0.5	2.5	Seasonality	Low
0.04689036	0.06384326	10	0.5	2.5	Seasonality	Low
0.03685533	0.04022763	10	0.5	2.5	Seasonality	Low
0.07952081	0.07777672	10	0.5	2.5	Seasonality	Low
0.05071301	0.04436418	10	0.5	2.5	Seasonality	Low
0.2264096	0.2118653	10	0.5	2.5	Seasonality	Low
0.08267493	0.08297574	10	0.5	2.5	Seasonality	Low
0.07051919	0.07298244	10	0.5	2.5	Seasonality	Low
0.08133576	0.08963662	10	0.5	2.5	Seasonality	Low
0.05259449	0.06043299	10	0.5	2.5	Seasonality	Low
0.09846471	0.1027238	10	0.5	2.5	Seasonality	Low
0.05093013	0.04294679	10	0.5	2.5	Seasonality	Low
0.02737605	0.02448988	10	0.5	2.5	Seasonality	Low
0.06846298	0.06375654	10	0.5	2.5	Seasonality	Low
0.01874447	0.02335967	10	0.5	2.5	Seasonality	Low
0.02372844	0.03096426	10	0.5	2.5	Seasonality	Low
0.2786318	0.2643899	10	0.5	2.5	Seasonality	Low
0.0602715	0.06593732	10	0.5	2.5	Seasonality	Low
0.1255787	0.109371	10	0.5	2.5	Seasonality	Low
0.1555361	0.1440909	10	0.5	2.5	Seasonality	Low
-0.009869889	-0.001483306	10	0.5	2.5	Seasonality	Low
0.02791587	0.03527452	10	0.5	2.5	Seasonality	Low
0.07595227	0.07939002	10	0.5	2.5	Seasonality	Low
0.07778635	0.08206895	10	0.5	2.5	Seasonality	Low
0.06371329	0.06771834	10	0.5	2.5	Seasonality	Low
0.0379502	0.04002288	10	0.5	2.5	Seasonality	Low
0.02555628	0.03483871	10	0.5	2.5	Seasonality	Low
0.08875362	0.09097978	10	0.5	2.5	Seasonality	Low
0.0392992	0.04885193	10	0.5	2.5	Seasonality	Low
0.1260732	0.1335834	10	0.5	2.5	Seasonality	Low
0.04310758	0.04132325	10	0.5	2.5	Seasonality	Low
0.04921016	0.05070195	10	0.5	2.5	Seasonality	Low
0.0294383	0.02280676	10	0.5	2.5	Seasonality	Low
0.08392394	0.0932192	10	0.5	2.5	Seasonality	Low
0.09987872	0.09626278	10	0.5	2.5	Seasonality	Low
0.08964278	0.09012022	10	0.5	2.5	Seasonality	Low
0.07407104	0.08484087	500	0.5	2.5	Seasonality	Low
0.1429342	0.1571277	500	0.5	2.5	Seasonality	Low
0.1714673	0.149247	500	0.5	2.5	Seasonality	Low
0.1524718	0.1554633	500	0.5	2.5	Seasonality	Low
0.09528059	0.09449916	500	0.5	2.5	Seasonality	Low
0.04589146	0.04776415	500	0.5	2.5	Seasonality	Low
0.1620377	0.1593929	500	0.5	2.5	Seasonality	Low
0.1704456	0.1689197	500	0.5	2.5	Seasonality	Low
0.09217722	0.0926473	500	0.5	2.5	Seasonality	Low
0.09342075	0.09322401	500	0.5	2.5	Seasonality	Low
0.1138539	0.1246785	500	0.5	2.5	Seasonality	Low
0.1245857	0.1263907	500	0.5	2.5	Seasonality	Low
0.1435638	0.1428256	500	0.5	2.5	Seasonality	Low
0.1317399	0.1303291	500	0.5	2.5	Seasonality	Low
0.07982846	0.07197865	500	0.5	2.5	Seasonality	Low
0.07380736	0.07350142	500	0.5	2.5	Seasonality	Low
0.03531104	0.03476468	500	0.5	2.5	Seasonality	Low
0.08412275	0.0886759	500	0.5	2.5	Seasonality	Low
0.1256992	0.1460744	500	0.5	2.5	Seasonality	Low
0.0634328	0.07033847	500	0.5	2.5	Seasonality	Low
0.1472263	0.1500324	500	0.5	2.5	Seasonality	Low
0.1208737	0.1251747	500	0.5	2.5	Seasonality	Low
0.1210128	0.1215554	500	0.5	2.5	Seasonality	Low
0.1051707	0.1015474	500	0.5	2.5	Seasonality	Low
0.1101974	0.1101815	500	0.5	2.5	Seasonality	Low
0.06754142	0.07501425	500	0.5	2.5	Seasonality	Low
0.08118545	0.07857766	500	0.5	2.5	Seasonality	Low
0.08141142	0.07478618	500	0.5	2.5	Seasonality	Low
0.1034729	0.09031437	500	0.5	2.5	Seasonality	Low
0.05782386	0.06964243	500	0.5	2.5	Seasonality	Low
0.104046	0.1044557	500	0.5	2.5	Seasonality	Low
0.1944413	0.1944324	500	0.5	2.5	Seasonality	Low
0.009851164	0.012907	5	0.5	2.5	Seasonality	High
0.0630101	0.05227215	5	0.5	2.5	Seasonality	High
0.02747766	0.02656984	5	0.5	2.5	Seasonality	High
0.0117158	0.004443275	5	0.5	2.5	Seasonality	High
0.04336152	0.05760981	5	0.5	2.5	Seasonality	High
0.02481714	0.03565441	5	0.5	2.5	Seasonality	High
0.04804621	0.0468509	5	0.5	2.5	Seasonality	High
0.03276776	0.03744921	5	0.5	2.5	Seasonality	High
-2.517492e-05	0.006574459	5	0.5	2.5	Seasonality	High
0.01561915	0.02827667	5	0.5	2.5	Seasonality	High
0.06970983	0.05912571	5	0.5	2.5	Seasonality	High
0.04755886	0.04868544	5	0.5	2.5	Seasonality	High
0.01741584	0.0259619	5	0.5	2.5	Seasonality	High
0.01117767	0.005538656	5	0.5	2.5	Seasonality	High
0.02013148	0.01029977	5	0.5	2.5	Seasonality	High
0.04917453	0.05553409	5	0.5	2.5	Seasonality	High
0.05334966	0.05386556	5	0.5	2.5	Seasonality	High
-0.00851103	-0.0007164972	5	0.5	2.5	Seasonality	High
0.02861475	0.02348386	5	0.5	2.5	Seasonality	High
0.01973003	0.01291119	5	0.5	2.5	Seasonality	High
0.05345225	0.05607888	5	0.5	2.5	Seasonality	High
0.0375281	0.03794545	5	0.5	2.5	Seasonality	High
0.01963279	0.01931911	5	0.5	2.5	Seasonality	High
0.02791847	0.0214026	5	0.5	2.5	Seasonality	High
0.0329467	0.04260239	5	0.5	2.5	Seasonality	High
0.04538571	0.04283103	5	0.5	2.5	Seasonality	High
0.0257266	0.02435108	5	0.5	2.5	Seasonality	High
0.02971771	0.03529986	5	0.5	2.5	Seasonality	High
0.03012708	0.02466036	5	0.5	2.5	Seasonality	High
0.01797189	0.02301457	5	0.5	2.5	Seasonality	High
0.04159606	0.03903082	5	0.5	2.5	Seasonality	High
0.0189659	0.02008715	5	0.5	2.5	Seasonality	High
0.02221954	0.02618815	5	0.5	2.5	Seasonality	High
0.07401742	0.07142596	5	0.5	2.5	Seasonality	High
0.07935047	0.06762093	5	0.5	2.5	Seasonality	High
0.07116211	0.05802239	5	0.5	2.5	Seasonality	High
0.02820633	0.04011096	5	0.5	2.5	Seasonality	High
0.0146831	0.01382228	5	0.5	2.5	Seasonality	High
0.06799724	0.07214309	5	0.5	2.5	Seasonality	High
0.02957401	0.02848249	5	0.5	2.5	Seasonality	High
-0.01838767	-0.01326942	5	0.5	2.5	Seasonality	High
-0.003837893	-0.003565977	5	0.5	2.5	Seasonality	High
0.07095486	0.06546727	5	0.5	2.5	Seasonality	High
0.03393245	0.03777826	5	0.5	2.5	Seasonality	High
-0.02352621	-0.01553524	5	0.5	2.5	Seasonality	High
0.03959709	0.03687772	5	0.5	2.5	Seasonality	High
0.03701474	0.0322392	5	0.5	2.5	Seasonality	High
0.03921967	0.03914598	5	0.5	2.5	Seasonality	High
0.02189712	0.02506455	5	0.5	2.5	Seasonality	High
0.07083415	0.07335824	5	0.5	2.5	Seasonality	High
0.04115448	0.03677893	5	0.5	2.5	Seasonality	High
0.01878625	0.02324149	5	0.5	2.5	Seasonality	High
-0.02593584	-0.00920553	5	0.5	2.5	Seasonality	High
-0.006646042	0.004727889	5	0.5	2.5	Seasonality	High
-0.01190638	-0.003202088	5	0.5	2.5	Seasonality	High
-0.003348103	-0.006000952	5	0.5	2.5	Seasonality	High
0.03608	0.03575827	5	0.5	2.5	Seasonality	High
0.004649769	0.01309133	5	0.5	2.5	Seasonality	High
0.04691662	0.04576266	5	0.5	2.5	Seasonality	High
0.02091494	0.01677345	5	0.5	2.5	Seasonality	High
-0.01171156	-0.005619132	5	0.5	2.5	Seasonality	High
0.02214219	0.0252801	5	0.5	2.5	Seasonality	High
0.06627874	0.05686664	5	0.5	2.5	Seasonality	High
0.04632775	0.04250346	5	0.5	2.5	Seasonality	High
0.07367592	0.07319346	5	0.5	2.5	Seasonality	High
0.08814166	0.07096586	5	0.5	2.5	Seasonality	High
0.03814892	0.04643086	5	0.5	2.5	Seasonality	High
0.03770089	0.04214835	5	0.5	2.5	Seasonality	High
0.05289272	0.05858867	5	0.5	2.5	Seasonality	High
0.06830616	0.06986232	5	0.5	2.5	Seasonality	High
0.04361808	0.04040792	10	0.5	2.5	Seasonality	High
-0.001333779	0.005993282	10	0.5	2.5	Seasonality	High
0.05025259	0.05673006	10	0.5	2.5	Seasonality	High
0.06195713	0.06484183	10	0.5	2.5	Seasonality	High
0.04026404	0.03607206	10	0.5	2.5	Seasonality	High
0.08512088	0.07988366	10	0.5	2.5	Seasonality	High
0.05298311	0.05656035	10	0.5	2.5	Seasonality	High
0.03130813	0.02905688	10	0.5	2.5	Seasonality	High
0.06043834	0.06578867	10	0.5	2.5	Seasonality	High
0.0590531	0.05765395	10	0.5	2.5	Seasonality	High
0.06872612	0.06976994	10	0.5	2.5	Seasonality	High
0.08018365	0.08887714	10	0.5	2.5	Seasonality	High
0.04134261	0.03654599	10	0.5	2.5	Seasonality	High
0.08533993	0.07931786	10	0.5	2.5	Seasonality	High
-0.0067362	-0.004756736	10	0.5	2.5	Seasonality	High
0.0434192	0.04120533	10	0.5	2.5	Seasonality	High
0.03512197	0.03540401	10	0.5	2.5	Seasonality	High
0.0804636	0.08555244	10	0.5	2.5	Seasonality	High
0.05431962	0.05657325	10	0.5	2.5	Seasonality	High
0.04914005	0.04750102	10	0.5	2.5	Seasonality	High
0.04208157	0.03607978	10	0.5	2.5	Seasonality	High
0.03537865	0.02928012	10	0.5	2.5	Seasonality	High
0.02659436	0.03000941	10	0.5	2.5	Seasonality	High
0.08699405	0.07959917	10	0.5	2.5	Seasonality	High
0.02730701	0.0289725	10	0.5	2.5	Seasonality	High
0.07156008	0.06689363	10	0.5	2.5	Seasonality	High
0.01668104	0.0141733	10	0.5	2.5	Seasonality	High
0.04690616	0.03982439	10	0.5	2.5	Seasonality	High
0.05406529	0.05614511	10	0.5	2.5	Seasonality	High
0.0558422	0.06083345	10	0.5	2.5	Seasonality	High
0.03527529	0.04200737	500	0.5	2.5	Seasonality	High
0.09503259	0.09520487	500	0.5	2.5	Seasonality	High
0.1010806	0.1006568	500	0.5	2.5	Seasonality	High
0.1699037	0.1610348	500	0.5	2.5	Seasonality	High
0.05163844	0.04842283	500	0.5	2.5	Seasonality	High
0.1395466	0.140882	500	0.5	2.5	Seasonality	High
0.0960273	0.09681229	500	0.5	2.5	Seasonality	High
0.05325189	0.04811729	500	0.5	2.5	Seasonality	High
0.165522	0.160755	500	0.5	2.5	Seasonality	High
0.1632079	0.1657341	500	0.5	2.5	Seasonality	High
0.1730448	0.1720447	500	0.5	2.5	Seasonality	High
0.04502647	0.04304466	500	0.5	2.5	Seasonality	High
0.09234741	0.0892002	500	0.5	2.5	Seasonality	High
0.05514005	0.05514799	500	0.5	2.5	Seasonality	High
0.1634207	0.1660794	500	0.5	2.5	Seasonality	High
0.03399108	0.03450205	500	0.5	2.5	Seasonality	High
0.1382706	0.1367096	500	0.5	2.5	Seasonality	High
0.1121007	0.1070431	500	0.5	2.5	Seasonality	High
0.1029949	0.1039754	500	0.5	2.5	Seasonality	High
0.1751972	0.1698952	500	0.5	2.5	Seasonality	High
0.1268337	0.1306321	500	0.5	2.5	Seasonality	High
0.08193168	0.08202048	500	0.5	2.5	Seasonality	High
0.1343785	0.1346007	500	0.5	2.5	Seasonality	High
0.06990563	0.06757819	500	0.5	2.5	Seasonality	High
0.1096992	0.1098909	500	0.5	2.5	Seasonality	High
0.1641112	0.1670725	500	0.5	2.5	Seasonality	High
0.07563742	0.06505892	500	0.5	2.5	Seasonality	High
0.1792034	0.1817868	500	0.5	2.5	Seasonality	High
0.05634505	0.05728081	500	0.5	2.5	Seasonality	High
0.1403657	0.1405601	500	0.5	2.5	Seasonality	High
0.1485499	0.148531	500	0.5	2.5	Seasonality	High
0.1730448	0.1720447	500	0.5	2.5	Seasonality	High
0.1029949	0.1039754	500	0.5	2.5	Seasonality	High
0.5142279	0.5191899	5	0.5	10	No seasonality	Low
0.569054	0.5687528	5	0.5	10	No seasonality	Low
0.5844183	0.5847816	5	0.5	10	No seasonality	Low
0.5034349	0.5053813	5	0.5	10	No seasonality	Low
0.559855	0.5684408	5	0.5	10	No seasonality	Low
0.5533732	0.5507035	5	0.5	10	No seasonality	Low
0.5324239	0.5301433	5	0.5	10	No seasonality	Low
0.5556602	0.5547876	5	0.5	10	No seasonality	Low
0.4479904	0.4491025	5	0.5	10	No seasonality	Low
0.5991168	0.5900174	5	0.5	10	No seasonality	Low
0.4174855	0.4232518	5	0.5	10	No seasonality	Low
0.6331004	0.6364413	5	0.5	10	No seasonality	Low
0.5147177	0.5174748	5	0.5	10	No seasonality	Low
0.5719547	0.5631864	5	0.5	10	No seasonality	Low
0.6450193	0.6559554	5	0.5	10	No seasonality	Low
0.4276144	0.4335451	5	0.5	10	No seasonality	Low
0.5274568	0.5268896	5	0.5	10	No seasonality	Low
0.5708129	0.5645978	5	0.5	10	No seasonality	Low
0.4789036	0.4760591	5	0.5	10	No seasonality	Low
0.5470028	0.5416794	5	0.5	10	No seasonality	Low
0.6303732	0.6176079	5	0.5	10	No seasonality	Low
0.5968985	0.5949262	5	0.5	10	No seasonality	Low
0.4982991	0.501329	5	0.5	10	No seasonality	Low
0.4875155	0.4852625	5	0.5	10	No seasonality	Low
0.557522	0.5535295	5	0.5	10	No seasonality	Low
0.4142882	0.4225764	5	0.5	10	No seasonality	Low
0.5981468	0.6161607	5	0.5	10	No seasonality	Low
0.528807	0.5416467	5	0.5	10	No seasonality	Low
0.3851817	0.3881677	5	0.5	10	No seasonality	Low
0.5103329	0.507179	5	0.5	10	No seasonality	Low
0.4923672	0.4832408	10	0.5	10	No seasonality	Low
0.5036617	0.4959311	10	0.5	10	No seasonality	Low
0.5698261	0.5778025	10	0.5	10	No seasonality	Low
0.5406895	0.5302122	10	0.5	10	No seasonality	Low
0.4113436	0.3875806	10	0.5	10	No seasonality	Low
0.4191047	0.4217589	10	0.5	10	No seasonality	Low
0.525987	0.520433	10	0.5	10	No seasonality	Low
0.3636439	0.3514791	10	0.5	10	No seasonality	Low
0.5409762	0.5394452	10	0.5	10	No seasonality	Low
0.5253306	0.517815	10	0.5	10	No seasonality	Low
0.6138921	0.6104528	10	0.5	10	No seasonality	Low
0.4778544	0.4815382	10	0.5	10	No seasonality	Low
0.4146794	0.4174158	10	0.5	10	No seasonality	Low
0.4669769	0.4656256	10	0.5	10	No seasonality	Low
0.560053	0.5567643	10	0.5	10	No seasonality	Low
0.6151906	0.6139536	10	0.5	10	No seasonality	Low
0.4757281	0.4805035	10	0.5	10	No seasonality	Low
0.4457304	0.4510473	10	0.5	10	No seasonality	Low
0.480412	0.4837188	10	0.5	10	No seasonality	Low
0.5394307	0.5305172	10	0.5	10	No seasonality	Low
0.5994089	0.5973459	10	0.5	10	No seasonality	Low
0.5129155	0.5190066	10	0.5	10	No seasonality	Low
0.5755806	0.5693717	10	0.5	10	No seasonality	Low
0.4653323	0.4640165	10	0.5	10	No seasonality	Low
0.5772296	0.5712765	10	0.5	10	No seasonality	Low
0.496465	0.4935053	10	0.5	10	No seasonality	Low
0.5507886	0.5509563	10	0.5	10	No seasonality	Low
0.4227254	0.4310925	10	0.5	10	No seasonality	Low
0.516017	0.5156081	10	0.5	10	No seasonality	Low
0.4264319	0.4333752	10	0.5	10	No seasonality	Low
0.4591547	0.4651646	10	0.5	10	No seasonality	Low
0.4975082	0.4937404	10	0.5	10	No seasonality	Low
0.3755755	0.3846567	10	0.5	10	No seasonality	Low
0.4836922	0.4868286	10	0.5	10	No seasonality	Low
0.5004277	0.5093395	10	0.5	10	No seasonality	Low
0.5771296	0.5797946	10	0.5	10	No seasonality	Low
0.5109527	0.5043542	10	0.5	10	No seasonality	Low
0.544383	0.5588271	10	0.5	10	No seasonality	Low
0.4503534	0.449133	10	0.5	10	No seasonality	Low
0.6298227	0.6331995	10	0.5	10	No seasonality	Low
0.4429976	0.4332655	10	0.5	10	No seasonality	Low
0.5736418	0.5889051	10	0.5	10	No seasonality	Low
0.6045117	0.5980408	10	0.5	10	No seasonality	Low
0.5597892	0.5562764	10	0.5	10	No seasonality	Low
0.5367391	0.5366937	10	0.5	10	No seasonality	Low
0.5640976	0.5626693	10	0.5	10	No seasonality	Low
0.5691333	0.5614979	10	0.5	10	No seasonality	Low
0.3760575	0.3996252	10	0.5	10	No seasonality	Low
0.5738245	0.5816587	10	0.5	10	No seasonality	Low
0.6373824	0.6262897	10	0.5	10	No seasonality	Low
0.462883	0.4538742	500	0.5	10	No seasonality	Low
0.4064906	0.4070297	500	0.5	10	No seasonality	Low
0.500903	0.5009429	500	0.5	10	No seasonality	Low
0.4172593	0.4164539	500	0.5	10	No seasonality	Low
0.5425316	0.5377045	500	0.5	10	No seasonality	Low
0.3877999	0.3881058	500	0.5	10	No seasonality	Low
0.41018	0.4100325	500	0.5	10	No seasonality	Low
0.454611	0.4652549	500	0.5	10	No seasonality	Low
0.6847962	0.6828408	500	0.5	10	No seasonality	Low
0.4448141	0.4461244	500	0.5	10	No seasonality	Low
0.6387499	0.6256826	500	0.5	10	No seasonality	Low
0.4508419	0.4713636	500	0.5	10	No seasonality	Low
0.555308	0.5568327	500	0.5	10	No seasonality	Low
0.5200162	0.5180373	500	0.5	10	No seasonality	Low
0.6321118	0.6256415	500	0.5	10	No seasonality	Low
0.5338325	0.5334903	500	0.5	10	No seasonality	Low
0.7055697	0.6909988	500	0.5	10	No seasonality	Low
0.5487635	0.5546948	500	0.5	10	No seasonality	Low
0.5859429	0.5902883	500	0.5	10	No seasonality	Low
0.5161628	0.5198646	500	0.5	10	No seasonality	Low
0.6495007	0.6457504	500	0.5	10	No seasonality	Low
0.5483297	0.5555231	500	0.5	10	No seasonality	Low
0.561216	0.5615837	500	0.5	10	No seasonality	Low
0.5326341	0.5343402	500	0.5	10	No seasonality	Low
0.5765424	0.5845444	500	0.5	10	No seasonality	Low
0.6605366	0.6479987	500	0.5	10	No seasonality	Low
0.6675311	0.6560264	500	0.5	10	No seasonality	Low
0.5924431	0.5798114	500	0.5	10	No seasonality	Low
0.6280997	0.6252033	500	0.5	10	No seasonality	Low
0.4866287	0.4947137	500	0.5	10	No seasonality	Low
0.6005323	0.5912491	500	0.5	10	No seasonality	Low
0.5802211	0.5909187	500	0.5	10	No seasonality	Low
0.6749298	0.6714885	500	0.5	10	No seasonality	Low
0.4952858	0.4952679	500	0.5	10	No seasonality	Low
0.4043689	0.4039856	500	0.5	10	No seasonality	Low
0.4956738	0.4960753	500	0.5	10	No seasonality	Low
0.6034753	0.5939717	5	0.5	10	No seasonality	High
0.5072565	0.4895036	5	0.5	10	No seasonality	High
0.4405186	0.4639357	5	0.5	10	No seasonality	High
0.5709872	0.5621254	5	0.5	10	No seasonality	High
0.586782	0.5835043	5	0.5	10	No seasonality	High
0.2269287	0.2431034	5	0.5	10	No seasonality	High
0.3159796	0.3132732	5	0.5	10	No seasonality	High
0.2238035	0.2254285	5	0.5	10	No seasonality	High
0.1748537	0.2204678	5	0.5	10	No seasonality	High
0.4631271	0.4536644	5	0.5	10	No seasonality	High
0.449128	0.4480513	5	0.5	10	No seasonality	High
0.3752373	0.3788025	5	0.5	10	No seasonality	High
0.3321339	0.3497581	5	0.5	10	No seasonality	High
0.6090862	0.5963652	5	0.5	10	No seasonality	High
0.309807	0.2960682	5	0.5	10	No seasonality	High
0.3234197	0.3045183	5	0.5	10	No seasonality	High
0.5583857	0.5657603	5	0.5	10	No seasonality	High
0.4902984	0.4792244	5	0.5	10	No seasonality	High
0.5749418	0.5487804	5	0.5	10	No seasonality	High
0.2827704	0.2915315	5	0.5	10	No seasonality	High
0.3730815	0.3939887	5	0.5	10	No seasonality	High
0.2596241	0.2046129	5	0.5	10	No seasonality	High
0.5029634	0.5108439	5	0.5	10	No seasonality	High
0.2376807	0.2716456	5	0.5	10	No seasonality	High
0.4313532	0.4355344	5	0.5	10	No seasonality	High
0.31829	0.344202	5	0.5	10	No seasonality	High
0.5233872	0.5352674	5	0.5	10	No seasonality	High
0.5135617	0.5271229	5	0.5	10	No seasonality	High
0.4274957	0.4127034	5	0.5	10	No seasonality	High
0.4517182	0.4282326	5	0.5	10	No seasonality	High
0.4935585	0.4901168	10	0.5	10	No seasonality	High
0.3708985	0.3828706	10	0.5	10	No seasonality	High
0.4728642	0.4729717	10	0.5	10	No seasonality	High
0.3349592	0.3496585	10	0.5	10	No seasonality	High
0.2594825	0.2702585	10	0.5	10	No seasonality	High
0.4881336	0.4875534	10	0.5	10	No seasonality	High
0.4083377	0.4212375	10	0.5	10	No seasonality	High
0.4473034	0.4409532	10	0.5	10	No seasonality	High
0.4009424	0.3905741	10	0.5	10	No seasonality	High
0.5651956	0.5665585	10	0.5	10	No seasonality	High
0.379113	0.3822274	10	0.5	10	No seasonality	High
0.3773151	0.3866216	10	0.5	10	No seasonality	High
0.3530314	0.3542444	10	0.5	10	No seasonality	High
0.5793584	0.5710578	10	0.5	10	No seasonality	High
0.4704513	0.4725364	10	0.5	10	No seasonality	High
0.3057554	0.2798073	10	0.5	10	No seasonality	High
0.3260382	0.3065062	10	0.5	10	No seasonality	High
0.4054435	0.3986193	10	0.5	10	No seasonality	High
0.4705915	0.4750208	10	0.5	10	No seasonality	High
0.326213	0.3228671	10	0.5	10	No seasonality	High
0.5655814	0.5449907	10	0.5	10	No seasonality	High
0.5505091	0.5490288	10	0.5	10	No seasonality	High
0.4575882	0.4703762	10	0.5	10	No seasonality	High
0.3445763	0.3306052	10	0.5	10	No seasonality	High
0.4787946	0.4793922	10	0.5	10	No seasonality	High
0.5482951	0.5384275	10	0.5	10	No seasonality	High
0.4168591	0.4240788	10	0.5	10	No seasonality	High
0.4794948	0.5074789	10	0.5	10	No seasonality	High
0.4098785	0.4105777	10	0.5	10	No seasonality	High
0.2925295	0.2665185	10	0.5	10	No seasonality	High
0.3312197	0.3427559	500	0.5	10	No seasonality	High
0.3831788	0.3826873	500	0.5	10	No seasonality	High
0.3820911	0.373876	500	0.5	10	No seasonality	High
0.3389971	0.3388444	500	0.5	10	No seasonality	High
0.5098231	0.5098685	500	0.5	10	No seasonality	High
0.4480746	0.4738341	500	0.5	10	No seasonality	High
0.413889	0.4170362	500	0.5	10	No seasonality	High
0.6285341	0.6195943	500	0.5	10	No seasonality	High
0.6344079	0.6328203	500	0.5	10	No seasonality	High
0.4510608	0.4578156	500	0.5	10	No seasonality	High
0.6431173	0.6611182	500	0.5	10	No seasonality	High
0.4945957	0.4946613	500	0.5	10	No seasonality	High
0.4325573	0.4756842	500	0.5	10	No seasonality	High
0.5219736	0.5239064	500	0.5	10	No seasonality	High
0.4925407	0.4832584	500	0.5	10	No seasonality	High
0.4213962	0.4246293	500	0.5	10	No seasonality	High
0.5709991	0.5689497	500	0.5	10	No seasonality	High
0.5007141	0.4935212	500	0.5	10	No seasonality	High
0.584803	0.5824234	500	0.5	10	No seasonality	High
0.3699909	0.3803438	500	0.5	10	No seasonality	High
0.6096153	0.6119528	500	0.5	10	No seasonality	High
0.4841923	0.4900266	500	0.5	10	No seasonality	High
0.4625122	0.4724816	500	0.5	10	No seasonality	High
0.5611873	0.5505263	500	0.5	10	No seasonality	High
0.4779444	0.504053	500	0.5	10	No seasonality	High
0.5943301	0.5894726	500	0.5	10	No seasonality	High
0.48029	0.4956367	500	0.5	10	No seasonality	High
0.4917085	0.4784539	500	0.5	10	No seasonality	High
0.4857356	0.4932868	500	0.5	10	No seasonality	High
0.4685274	0.4555829	500	0.5	10	No seasonality	High
0.5828561	0.5752212	500	0.5	10	No seasonality	High
0.4294732	0.4048956	500	0.5	10	No seasonality	High
0.47737	0.4772859	500	0.5	10	No seasonality	High
0.4861345	0.4859642	500	0.5	10	No seasonality	High
0.3960518	0.3972612	500	0.5	10	No seasonality	High
0.4170891	0.4172193	500	0.5	10	No seasonality	High
0.560511	0.5599168	5	0.5	10	Seasonality	Low
0.5812112	0.5826716	5	0.5	10	Seasonality	Low
0.5876733	0.5862165	5	0.5	10	Seasonality	Low
0.5167156	0.5052247	5	0.5	10	Seasonality	Low
0.529632	0.5304021	5	0.5	10	Seasonality	Low
0.6378286	0.6286062	5	0.5	10	Seasonality	Low
0.5665458	0.5657157	5	0.5	10	Seasonality	Low
0.5229237	0.5287846	5	0.5	10	Seasonality	Low
0.6133974	0.6175453	5	0.5	10	Seasonality	Low
0.5703618	0.5775043	5	0.5	10	Seasonality	Low
0.5585078	0.5545212	5	0.5	10	Seasonality	Low
0.5656136	0.567756	5	0.5	10	Seasonality	Low
0.6036337	0.591617	5	0.5	10	Seasonality	Low
0.539074	0.5318194	5	0.5	10	Seasonality	Low
0.5466652	0.5460826	5	0.5	10	Seasonality	Low
0.6204362	0.6162951	5	0.5	10	Seasonality	Low
0.6345056	0.6314449	5	0.5	10	Seasonality	Low
0.5830955	0.5884588	5	0.5	10	Seasonality	Low
0.5906211	0.5931628	5	0.5	10	Seasonality	Low
0.5555789	0.5611186	5	0.5	10	Seasonality	Low
0.573626	0.5551775	5	0.5	10	Seasonality	Low
0.4921306	0.514429	5	0.5	10	Seasonality	Low
0.5682897	0.5645171	5	0.5	10	Seasonality	Low
0.5496539	0.5395976	5	0.5	10	Seasonality	Low
0.5602692	0.5581542	5	0.5	10	Seasonality	Low
0.4870726	0.4671654	5	0.5	10	Seasonality	Low
0.5511563	0.5453222	5	0.5	10	Seasonality	Low
0.5845459	0.5905777	5	0.5	10	Seasonality	Low
0.5280351	0.5295484	5	0.5	10	Seasonality	Low
0.5084133	0.5208574	5	0.5	10	Seasonality	Low
0.6138047	0.6175214	5	0.5	10	Seasonality	Low
0.610379	0.6164475	5	0.5	10	Seasonality	Low
0.5831712	0.6036152	5	0.5	10	Seasonality	Low
0.597241	0.6090267	5	0.5	10	Seasonality	Low
0.6215296	0.6170807	5	0.5	10	Seasonality	Low
0.5869491	0.596428	5	0.5	10	Seasonality	Low
0.5863132	0.5753764	5	0.5	10	Seasonality	Low
0.6276395	0.6160314	5	0.5	10	Seasonality	Low
0.5886012	0.5944908	5	0.5	10	Seasonality	Low
0.5936286	0.5856119	5	0.5	10	Seasonality	Low
0.6106857	0.6075809	5	0.5	10	Seasonality	Low
0.6243022	0.6167513	5	0.5	10	Seasonality	Low
0.6386735	0.6302782	5	0.5	10	Seasonality	Low
0.6277817	0.6307206	5	0.5	10	Seasonality	Low
0.6153594	0.6197466	5	0.5	10	Seasonality	Low
0.6215632	0.6079668	5	0.5	10	Seasonality	Low
0.6288219	0.6238839	5	0.5	10	Seasonality	Low
0.6342775	0.6262609	5	0.5	10	Seasonality	Low
0.6213699	0.6254131	5	0.5	10	Seasonality	Low
0.6157954	0.623235	5	0.5	10	Seasonality	Low
0.6023841	0.5864066	5	0.5	10	Seasonality	Low
0.6055818	0.6080526	5	0.5	10	Seasonality	Low
0.5466517	0.5554932	5	0.5	10	Seasonality	Low
0.6263854	0.6210233	5	0.5	10	Seasonality	Low
0.6250728	0.6269958	5	0.5	10	Seasonality	Low
0.6259859	0.627924	5	0.5	10	Seasonality	Low
0.583855	0.6077613	5	0.5	10	Seasonality	Low
0.6143095	0.6169438	5	0.5	10	Seasonality	Low
0.608604	0.6140854	5	0.5	10	Seasonality	Low
0.6088398	0.6042691	5	0.5	10	Seasonality	Low
0.623407	0.6293407	5	0.5	10	Seasonality	Low
0.6100032	0.597731	5	0.5	10	Seasonality	Low
0.625686	0.6205764	5	0.5	10	Seasonality	Low
0.5931525	0.5933643	5	0.5	10	Seasonality	Low
0.6009222	0.5951215	5	0.5	10	Seasonality	Low
0.5972742	0.5983612	5	0.5	10	Seasonality	Low
0.5758228	0.5619846	5	0.5	10	Seasonality	Low
0.5993032	0.594923	5	0.5	10	Seasonality	Low
0.6126883	0.5981836	5	0.5	10	Seasonality	Low
0.5585812	0.5513781	5	0.5	10	Seasonality	Low
0.6304816	0.6183643	10	0.5	10	Seasonality	Low
0.5560112	0.5547759	10	0.5	10	Seasonality	Low
0.4686575	0.4648696	10	0.5	10	Seasonality	Low
0.4911677	0.4981257	10	0.5	10	Seasonality	Low
0.5030795	0.5012913	10	0.5	10	Seasonality	Low
0.5840654	0.577798	10	0.5	10	Seasonality	Low
0.4112346	0.4069939	10	0.5	10	Seasonality	Low
0.5547537	0.5540389	10	0.5	10	Seasonality	Low
0.5762143	0.5952943	10	0.5	10	Seasonality	Low
0.5465222	0.5468149	10	0.5	10	Seasonality	Low
0.5142549	0.5227044	10	0.5	10	Seasonality	Low
0.4663936	0.4797902	10	0.5	10	Seasonality	Low
0.5446608	0.5280699	10	0.5	10	Seasonality	Low
0.5408168	0.5514195	10	0.5	10	Seasonality	Low
0.5341538	0.524313	10	0.5	10	Seasonality	Low
0.5302026	0.5257834	10	0.5	10	Seasonality	Low
0.5969985	0.5901272	10	0.5	10	Seasonality	Low
0.4687391	0.4844595	10	0.5	10	Seasonality	Low
0.5800023	0.5573738	10	0.5	10	Seasonality	Low
0.4718888	0.4577822	10	0.5	10	Seasonality	Low
0.5457518	0.5358892	10	0.5	10	Seasonality	Low
0.481588	0.483104	10	0.5	10	Seasonality	Low
0.5897637	0.5799353	10	0.5	10	Seasonality	Low
0.5122343	0.5114068	10	0.5	10	Seasonality	Low
0.5030348	0.5091499	10	0.5	10	Seasonality	Low
0.5796123	0.5826544	10	0.5	10	Seasonality	Low
0.5581959	0.5561119	10	0.5	10	Seasonality	Low
0.5577176	0.5541812	10	0.5	10	Seasonality	Low
0.5773834	0.5754099	10	0.5	10	Seasonality	Low
0.6177573	0.615748	10	0.5	10	Seasonality	Low
0.4187857	0.4394093	10	0.5	10	Seasonality	Low
0.5235279	0.5109513	10	0.5	10	Seasonality	Low
0.5709552	0.5597154	10	0.5	10	Seasonality	Low
0.5165526	0.5099878	10	0.5	10	Seasonality	Low
0.492151	0.4906238	10	0.5	10	Seasonality	Low
0.580189	0.581018	10	0.5	10	Seasonality	Low
0.5009129	0.5030652	10	0.5	10	Seasonality	Low
0.6043756	0.6090249	10	0.5	10	Seasonality	Low
0.6318907	0.6296689	10	0.5	10	Seasonality	Low
0.6227892	0.6320967	10	0.5	10	Seasonality	Low
0.5379103	0.5568493	10	0.5	10	Seasonality	Low
0.6299043	0.6120662	10	0.5	10	Seasonality	Low
0.6039474	0.5947318	10	0.5	10	Seasonality	Low
0.5917087	0.5942457	10	0.5	10	Seasonality	Low
0.6320909	0.6077319	10	0.5	10	Seasonality	Low
0.56765	0.5736027	10	0.5	10	Seasonality	Low
0.6246706	0.6193661	10	0.5	10	Seasonality	Low
0.616366	0.6123021	10	0.5	10	Seasonality	Low
0.6202506	0.6256644	10	0.5	10	Seasonality	Low
0.5994061	0.5997829	10	0.5	10	Seasonality	Low
0.6214353	0.6185607	10	0.5	10	Seasonality	Low
0.4538815	0.4532009	10	0.5	10	Seasonality	Low
0.6096925	0.603921	10	0.5	10	Seasonality	Low
0.5137062	0.5118408	10	0.5	10	Seasonality	Low
0.6059215	0.6126213	10	0.5	10	Seasonality	Low
0.6125206	0.6192213	10	0.5	10	Seasonality	Low
0.6201369	0.6215414	10	0.5	10	Seasonality	Low
0.477238	0.475688	10	0.5	10	Seasonality	Low
0.6062887	0.6129604	10	0.5	10	Seasonality	Low
0.6098762	0.6153586	10	0.5	10	Seasonality	Low
0.6329615	0.6197815	10	0.5	10	Seasonality	Low
0.5999972	0.5949757	10	0.5	10	Seasonality	Low
0.4214504	0.424052	10	0.5	10	Seasonality	Low
0.5427122	0.5439266	10	0.5	10	Seasonality	Low
0.6023105	0.6099235	10	0.5	10	Seasonality	Low
0.4544986	0.4656905	10	0.5	10	Seasonality	Low
0.4558874	0.4437265	10	0.5	10	Seasonality	Low
0.5524887	0.5458422	10	0.5	10	Seasonality	Low
0.4756965	0.4828271	10	0.5	10	Seasonality	Low
0.5329884	0.5295937	10	0.5	10	Seasonality	Low
0.3882677	0.3884908	500	0.5	10	Seasonality	Low
0.4209651	0.4157132	500	0.5	10	Seasonality	Low
0.348749	0.3486411	500	0.5	10	Seasonality	Low
0.3778504	0.3747483	500	0.5	10	Seasonality	Low
0.4104321	0.4038734	500	0.5	10	Seasonality	Low
0.3907052	0.3884387	500	0.5	10	Seasonality	Low
0.3941935	0.3870199	500	0.5	10	Seasonality	Low
0.3941356	0.3854292	500	0.5	10	Seasonality	Low
0.3642137	0.3685985	500	0.5	10	Seasonality	Low
0.4239199	0.423782	500	0.5	10	Seasonality	Low
0.540638	0.5227225	500	0.5	10	Seasonality	Low
0.4947783	0.5060825	500	0.5	10	Seasonality	Low
0.5495632	0.5454875	500	0.5	10	Seasonality	Low
0.496286	0.5204827	500	0.5	10	Seasonality	Low
0.6007806	0.5856347	500	0.5	10	Seasonality	Low
0.5815889	0.5834021	500	0.5	10	Seasonality	Low
0.4837395	0.4829355	500	0.5	10	Seasonality	Low
0.4283603	0.4325525	500	0.5	10	Seasonality	Low
0.4914331	0.4902343	500	0.5	10	Seasonality	Low
0.5982948	0.595123	500	0.5	10	Seasonality	Low
0.5915368	0.5861453	500	0.5	10	Seasonality	Low
0.481982	0.4830134	500	0.5	10	Seasonality	Low
0.5206655	0.5308937	500	0.5	10	Seasonality	Low
0.4407659	0.4390527	500	0.5	10	Seasonality	Low
0.5556373	0.5617958	500	0.5	10	Seasonality	Low
0.525737	0.5321855	500	0.5	10	Seasonality	Low
0.4605085	0.4582699	500	0.5	10	Seasonality	Low
0.5302417	0.53302	500	0.5	10	Seasonality	Low
0.4917691	0.4862331	500	0.5	10	Seasonality	Low
0.5204372	0.5332533	500	0.5	10	Seasonality	Low
0.5490092	0.5538541	500	0.5	10	Seasonality	Low
0.4773875	0.4758542	500	0.5	10	Seasonality	Low
0.5039955	0.4977434	500	0.5	10	Seasonality	Low
0.5590813	0.5428048	500	0.5	10	Seasonality	Low
0.5233769	0.5236055	500	0.5	10	Seasonality	Low
0.4552543	0.455476	500	0.5	10	Seasonality	Low
0.5511252	0.5540742	5	0.5	10	Seasonality	High
0.4466654	0.4478592	5	0.5	10	Seasonality	High
0.4051221	0.4226659	5	0.5	10	Seasonality	High
0.4492411	0.4711212	5	0.5	10	Seasonality	High
0.5087064	0.5283937	5	0.5	10	Seasonality	High
0.5331185	0.531851	5	0.5	10	Seasonality	High
0.1593867	0.261363	5	0.5	10	Seasonality	High
0.5975683	0.6103513	5	0.5	10	Seasonality	High
0.5220449	0.5297493	5	0.5	10	Seasonality	High
0.556097	0.5652357	5	0.5	10	Seasonality	High
0.5764937	0.6003553	5	0.5	10	Seasonality	High
0.5570811	0.5655226	5	0.5	10	Seasonality	High
0.3918285	0.3985006	5	0.5	10	Seasonality	High
0.4866636	0.5131811	5	0.5	10	Seasonality	High
0.5851291	0.5734772	5	0.5	10	Seasonality	High
0.5830895	0.5732003	5	0.5	10	Seasonality	High
0.5408473	0.5319964	5	0.5	10	Seasonality	High
0.6035598	0.6109784	5	0.5	10	Seasonality	High
0.5023069	0.4997913	5	0.5	10	Seasonality	High
0.2623715	0.2850324	5	0.5	10	Seasonality	High
0.4321562	0.4401852	5	0.5	10	Seasonality	High
0.5134308	0.5214551	5	0.5	10	Seasonality	High
0.5408179	0.5516599	5	0.5	10	Seasonality	High
0.1947696	0.09593103	5	0.5	10	Seasonality	High
0.3168245	0.3307908	5	0.5	10	Seasonality	High
0.5388942	0.5357847	5	0.5	10	Seasonality	High
0.6241631	0.6227497	5	0.5	10	Seasonality	High
0.2213022	0.2668744	5	0.5	10	Seasonality	High
0.5382213	0.5224163	5	0.5	10	Seasonality	High
0.4446134	0.4741637	5	0.5	10	Seasonality	High
0.3623211	0.3954294	5	0.5	10	Seasonality	High
0.5492129	0.5535286	5	0.5	10	Seasonality	High
0.5945422	0.5942832	5	0.5	10	Seasonality	High
0.5967446	0.6147251	5	0.5	10	Seasonality	High
0.578827	0.5892474	5	0.5	10	Seasonality	High
0.5985984	0.5853372	5	0.5	10	Seasonality	High
0.5524048	0.5517673	5	0.5	10	Seasonality	High
0.5897157	0.6001081	5	0.5	10	Seasonality	High
0.5345687	0.5254847	5	0.5	10	Seasonality	High
0.5972682	0.5849028	5	0.5	10	Seasonality	High
0.586799	0.5720356	5	0.5	10	Seasonality	High
0.5897649	0.6016433	5	0.5	10	Seasonality	High
0.5950061	0.6033864	5	0.5	10	Seasonality	High
0.5378059	0.5349491	5	0.5	10	Seasonality	High
0.5931865	0.5776673	5	0.5	10	Seasonality	High
0.5842953	0.5899273	5	0.5	10	Seasonality	High
0.5972787	0.6133586	5	0.5	10	Seasonality	High
0.5708499	0.5752082	5	0.5	10	Seasonality	High
0.5825405	0.5781537	5	0.5	10	Seasonality	High
0.6087469	0.6107416	5	0.5	10	Seasonality	High
0.499676	0.4862313	10	0.5	10	Seasonality	High
0.4178379	0.4019775	10	0.5	10	Seasonality	High
0.1953232	0.1981519	10	0.5	10	Seasonality	High
0.1869282	0.1919542	10	0.5	10	Seasonality	High
0.4722983	0.4498519	10	0.5	10	Seasonality	High
0.4261473	0.3670309	10	0.5	10	Seasonality	High
0.5447608	0.5403947	10	0.5	10	Seasonality	High
0.3265931	0.3469341	10	0.5	10	Seasonality	High
0.5116571	0.517238	10	0.5	10	Seasonality	High
0.4476428	0.4409711	10	0.5	10	Seasonality	High
0.3427839	0.3235858	10	0.5	10	Seasonality	High
0.583164	0.5824605	10	0.5	10	Seasonality	High
0.163794	0.1573178	10	0.5	10	Seasonality	High
0.4606319	0.4639861	10	0.5	10	Seasonality	High
0.4744179	0.4691894	10	0.5	10	Seasonality	High
0.5707663	0.5778338	10	0.5	10	Seasonality	High
0.6326595	0.6158919	10	0.5	10	Seasonality	High
0.5298216	0.5248002	10	0.5	10	Seasonality	High
0.5237083	0.5285597	10	0.5	10	Seasonality	High
0.3891779	0.3871134	10	0.5	10	Seasonality	High
0.5910955	0.5905475	10	0.5	10	Seasonality	High
0.3933682	0.3764207	10	0.5	10	Seasonality	High
0.5597711	0.5688563	10	0.5	10	Seasonality	High
0.4116214	0.4179689	10	0.5	10	Seasonality	High
0.4972213	0.4852642	10	0.5	10	Seasonality	High
0.6141799	0.6174615	10	0.5	10	Seasonality	High
0.5258628	0.5061437	10	0.5	10	Seasonality	High
0.5433822	0.5391242	10	0.5	10	Seasonality	High
0.5673639	0.5608738	10	0.5	10	Seasonality	High
0.5441221	0.5420292	10	0.5	10	Seasonality	High
0.4748041	0.4700731	10	0.5	10	Seasonality	High
0.5154304	0.5054376	10	0.5	10	Seasonality	High
0.3568871	0.3438961	10	0.5	10	Seasonality	High
0.214332	0.2480987	10	0.5	10	Seasonality	High
0.51108	0.505427	10	0.5	10	Seasonality	High
0.499727	0.4948136	10	0.5	10	Seasonality	High
0.257778	0.2902418	10	0.5	10	Seasonality	High
0.5318436	0.5309012	10	0.5	10	Seasonality	High
0.6299505	0.6227485	10	0.5	10	Seasonality	High
0.5612699	0.5481163	10	0.5	10	Seasonality	High
0.604567	0.6126245	10	0.5	10	Seasonality	High
0.590374	0.5884649	10	0.5	10	Seasonality	High
0.5845608	0.5845247	10	0.5	10	Seasonality	High
0.5567995	0.5675714	10	0.5	10	Seasonality	High
0.5633013	0.5766031	10	0.5	10	Seasonality	High
0.5811492	0.5761431	10	0.5	10	Seasonality	High
0.597214	0.6031541	10	0.5	10	Seasonality	High
0.5037802	0.5043954	10	0.5	10	Seasonality	High
0.5358603	0.5639305	10	0.5	10	Seasonality	High
0.1852819	0.2760871	10	0.5	10	Seasonality	High
0.5688794	0.5749078	10	0.5	10	Seasonality	High
0.477248	0.4922892	10	0.5	10	Seasonality	High
0.5776254	0.5779504	10	0.5	10	Seasonality	High
0.494326	0.4813283	10	0.5	10	Seasonality	High
0.5801416	0.5742064	10	0.5	10	Seasonality	High
0.622782	0.6129823	10	0.5	10	Seasonality	High
0.623591	0.6164165	10	0.5	10	Seasonality	High
0.6320892	0.628591	10	0.5	10	Seasonality	High
0.6209715	0.6243896	10	0.5	10	Seasonality	High
0.6102824	0.6101458	10	0.5	10	Seasonality	High
0.5924253	0.5878988	10	0.5	10	Seasonality	High
0.6336837	0.6329038	10	0.5	10	Seasonality	High
0.5642764	0.5615795	10	0.5	10	Seasonality	High
0.4632832	0.4582803	10	0.5	10	Seasonality	High
0.6279047	0.6293362	10	0.5	10	Seasonality	High
0.5872978	0.5798939	10	0.5	10	Seasonality	High
0.5779216	0.5853792	10	0.5	10	Seasonality	High
0.583024	0.578642	10	0.5	10	Seasonality	High
0.5462345	0.5509715	10	0.5	10	Seasonality	High
0.6262615	0.6368785	10	0.5	10	Seasonality	High
0.3720114	0.3724276	500	0.5	10	Seasonality	High
0.391949	0.3920123	500	0.5	10	Seasonality	High
0.3534941	0.3504234	500	0.5	10	Seasonality	High
0.415949	0.4094859	500	0.5	10	Seasonality	High
0.4280866	0.4504616	500	0.5	10	Seasonality	High
0.3216803	0.3060983	500	0.5	10	Seasonality	High
0.316938	0.3166738	500	0.5	10	Seasonality	High
0.3789742	0.3789681	500	0.5	10	Seasonality	High
0.443777	0.4364691	500	0.5	10	Seasonality	High
0.4906764	0.4796005	500	0.5	10	Seasonality	High
0.4289613	0.4198087	500	0.5	10	Seasonality	High
0.5968763	0.593989	500	0.5	10	Seasonality	High
0.4860161	0.4637811	500	0.5	10	Seasonality	High
0.3047424	0.2956398	500	0.5	10	Seasonality	High
0.3784043	0.378931	500	0.5	10	Seasonality	High
0.4458846	0.4463437	500	0.5	10	Seasonality	High
0.5804966	0.5861122	500	0.5	10	Seasonality	High
0.4695338	0.4866513	500	0.5	10	Seasonality	High
0.446487	0.4496252	500	0.5	10	Seasonality	High
0.4853104	0.4766707	500	0.5	10	Seasonality	High
0.5331097	0.5380679	500	0.5	10	Seasonality	High
0.4850426	0.4928189	500	0.5	10	Seasonality	High
0.5942742	0.5877025	500	0.5	10	Seasonality	High
0.5797236	0.5788898	500	0.5	10	Seasonality	High
0.5586811	0.5701288	500	0.5	10	Seasonality	High
0.5714476	0.5608984	500	0.5	10	Seasonality	High
0.4594976	0.4617685	500	0.5	10	Seasonality	High
0.4368426	0.4511432	500	0.5	10	Seasonality	High
0.4283602	0.4222021	500	0.5	10	Seasonality	High
0.4201313	0.4047066	500	0.5	10	Seasonality	High
0.3870857	0.3794963	500	0.5	10	Seasonality	High
0.4119061	0.4114891	500	0.5	10	Seasonality	High
0.415949	0.4094859	500	0.5	10	Seasonality	High
0.4906764	0.4796005	500	0.5	10	Seasonality	High
