# Supplementary material for: The influence of biological, epidemiological, and treatment factors on the establishment and spread of drug-resistant Plasmodium falciparum
Source: eLife. 2022 Jul 7;11:e77634. doi: 10.7554/eLife.77634 (PMC9262398; doi:10.7554/eLife.77634)
Supplement: Appendix 1—figure 11—source data 1. [file elife-77634-app1-fig11-data1.csv]

Test_True	Test_predicted	Eir	Access_treatment	Resistance_level	Seasonality_pattern	Adherence_treatment
-0.0282145688396539	-0.0269225729964502	5	0.04	7	No seasonality	Low
-0.0154559170874382	-0.00940208386428728	5	0.04	7	No seasonality	Low
0.0196717219319675	0.0204122628835032	5	0.04	7	No seasonality	Low
-0.0396307085900956	-0.0400524160440961	5	0.04	7	No seasonality	Low
-0.0229015093521419	-0.030266391069088	5	0.04	7	No seasonality	Low
0.0196204043642218	0.0188309346991002	5	0.04	7	No seasonality	Low
-0.0175917991638276	-0.0253394725291505	5	0.04	7	No seasonality	Low
-0.00988677218702136	-0.00331771501563932	5	0.04	7	No seasonality	Low
-0.0445168092695081	-0.0414770987255817	5	0.04	7	No seasonality	Low
-0.00415888120992125	-0.00914270066359329	5	0.04	7	No seasonality	Low
-0.0438062099877	-0.0442839047949609	5	0.04	7	No seasonality	Low
-0.0103906420332337	-0.0103567666114137	5	0.04	7	No seasonality	Low
-0.0187909659313205	-0.0184773005574376	5	0.04	7	No seasonality	Low
-0.0320432535336281	-0.0304411547922206	5	0.04	7	No seasonality	Low
0.0171111875632655	0.0168571621058064	5	0.04	7	No seasonality	Low
-0.0446523945539837	-0.0468255884339447	5	0.04	7	No seasonality	Low
-0.0480411514231917	-0.0459842257989807	5	0.04	7	No seasonality	Low
-0.028236464024486	-0.0334797947109066	5	0.04	7	No seasonality	Low
-0.0230852816998672	-0.0238130852996864	5	0.04	7	No seasonality	Low
-0.0310536153218941	-0.0341034543488821	5	0.04	7	No seasonality	Low
-0.00516772499302931	-0.00731893148711335	5	0.04	7	No seasonality	Low
0.026324661341561	0.0223964841216476	5	0.04	7	No seasonality	Low
-0.0339436271310059	-0.0369055809750866	5	0.04	7	No seasonality	Low
0.012482540037172	0.0145691743187526	5	0.04	7	No seasonality	Low
0.0274276163125885	0.0229533683815062	5	0.04	7	No seasonality	Low
0.0054314313434351	0.00491530204252194	5	0.04	7	No seasonality	Low
-0.0291512005319883	-0.030712770554901	5	0.04	7	No seasonality	Low
-0.0450110084808022	-0.0438690402401114	5	0.04	7	No seasonality	Low
-0.0118174833610951	-0.0101557534235637	5	0.04	7	No seasonality	Low
-0.00724781712353349	-0.00726593871638353	5	0.04	7	No seasonality	Low
-0.0372293625674385	-0.0353868877088286	5	0.04	7	No seasonality	Low
-0.0459752616892977	-0.0483740980175898	5	0.04	7	No seasonality	Low
0.0238712587424037	0.0171755518671665	5	0.04	7	No seasonality	Low
0.0273566436968527	0.0266952223448889	5	0.04	7	No seasonality	Low
-0.0360617803913941	-0.0394776955143158	5	0.04	7	No seasonality	Low
-0.0751848803688152	-0.0498419966086882	5	0.04	7	No seasonality	Low
-0.0507252337407288	-0.0405107206990759	5	0.04	7	No seasonality	Low
-0.0616330128337767	-0.0500214573447751	5	0.04	7	No seasonality	Low
0.00549757751531567	0.00238494028294162	5	0.04	7	No seasonality	Low
-0.0451140165987407	-0.0468863287645913	5	0.04	7	No seasonality	Low
0.0250548711546979	0.0244282200268577	5	0.04	7	No seasonality	Low
-0.0412570955556177	-0.0395261543088092	5	0.04	7	No seasonality	Low
0.0254056284559124	0.0221879557574825	5	0.04	7	No seasonality	Low
-0.0458688927185888	-0.0418938912300851	5	0.04	7	No seasonality	Low
-0.0464564217895792	-0.0455260530626711	5	0.04	7	No seasonality	Low
-0.0543864726328193	-0.053296426292802	5	0.04	7	No seasonality	Low
0.00153658237334018	0.00127855869145447	5	0.04	7	No seasonality	Low
0.0258837895232772	0.0203475498343868	5	0.04	7	No seasonality	Low
-0.0631859827437205	-0.0507511354238706	5	0.04	7	No seasonality	Low
-0.0471394952185232	-0.0464167323395733	5	0.04	7	No seasonality	Low
-0.0184360407974966	-0.0147779058503671	10	0.04	7	No seasonality	Low
-0.0119909907862459	-0.0100460410256485	10	0.04	7	No seasonality	Low
0.0117362457119966	0.0081806995995694	10	0.04	7	No seasonality	Low
0.0119350221623513	0.0100137084063494	10	0.04	7	No seasonality	Low
-0.0548838609247781	-0.0541172452871844	10	0.04	7	No seasonality	Low
-0.044503658198631	-0.037781960336846	10	0.04	7	No seasonality	Low
-0.0139697105538465	-0.0127071855463172	10	0.04	7	No seasonality	Low
-0.00523145044821838	-0.00846883487096493	10	0.04	7	No seasonality	Low
-0.0190645613753694	-0.0193824909526445	10	0.04	7	No seasonality	Low
-0.00102526335020744	0.000401625968855738	10	0.04	7	No seasonality	Low
-0.0563093616946057	-0.0539356014589902	10	0.04	7	No seasonality	Low
-0.0288797071767032	-0.0270639505713541	10	0.04	7	No seasonality	Low
-0.0128575298982451	-0.0156867847269348	10	0.04	7	No seasonality	Low
0.0120213338291683	0.0110187399976729	10	0.04	7	No seasonality	Low
-0.047179886176415	-0.0427512057915403	10	0.04	7	No seasonality	Low
0.00717880949179281	0.00516559931985042	10	0.04	7	No seasonality	Low
0.00740005223343459	0.00494030139334319	10	0.04	7	No seasonality	Low
-0.00416780519308445	0.000531079456926434	10	0.04	7	No seasonality	Low
-0.0223259788470409	-0.0243179263773795	10	0.04	7	No seasonality	Low
-0.0325108216271936	-0.0244504873568045	10	0.04	7	No seasonality	Low
0.00679524101387548	0.00967613278319961	10	0.04	7	No seasonality	Low
-0.0523112443975956	-0.050877436037382	10	0.04	7	No seasonality	Low
-0.0149267137944975	-0.0148171828248029	10	0.04	7	No seasonality	Low
0.0239562965539503	0.0157826869000661	10	0.04	7	No seasonality	Low
-0.0497203847954309	-0.0489830223607627	10	0.04	7	No seasonality	Low
0.0141068980327108	0.0150560024004947	10	0.04	7	No seasonality	Low
-0.0159792244927277	-0.0173696492048593	10	0.04	7	No seasonality	Low
-0.0462974423232671	-0.0436213362700802	10	0.04	7	No seasonality	Low
-0.0571498540356085	-0.0499080492844986	10	0.04	7	No seasonality	Low
-0.00429009738052379	-0.00717964435995211	10	0.04	7	No seasonality	Low
0.00442335183949357	0.00359831894343054	500	0.04	7	No seasonality	Low
0.00980053733440074	0.00902138722708924	500	0.04	7	No seasonality	Low
-0.0409133572890081	-0.0397822189685709	500	0.04	7	No seasonality	Low
-0.0559383729500707	-0.0577010464631967	500	0.04	7	No seasonality	Low
-0.041386125663505	-0.0493710915844168	500	0.04	7	No seasonality	Low
-0.061867763583813	-0.0659903210739951	500	0.04	7	No seasonality	Low
-0.082866622577979	-0.0783082864002959	500	0.04	7	No seasonality	Low
-0.00733092829253444	-0.0103440572099597	500	0.04	7	No seasonality	Low
-0.0253356476004186	-0.0271168836647135	500	0.04	7	No seasonality	Low
-0.0126757064807257	-0.0121686974194976	500	0.04	7	No seasonality	Low
-0.0656364222926059	-0.06401219332102	500	0.04	7	No seasonality	Low
-0.0108438126889089	-0.0123414409189462	500	0.04	7	No seasonality	Low
0.0240299365559193	0.0257419474281352	500	0.04	7	No seasonality	Low
-0.0323258691534552	-0.0340169399329754	500	0.04	7	No seasonality	Low
-0.0645291177750607	-0.0654027406871782	500	0.04	7	No seasonality	Low
-0.0458166398352464	-0.0473126622948959	500	0.04	7	No seasonality	Low
0.0141731585591626	0.0151094482126067	500	0.04	7	No seasonality	Low
-0.0182525280296682	-0.0189145872187191	500	0.04	7	No seasonality	Low
-0.0715768741410845	-0.0716689142339301	500	0.04	7	No seasonality	Low
-0.0248391195110838	-0.0217396172867856	500	0.04	7	No seasonality	Low
-0.0502908198056017	-0.0540293347555389	500	0.04	7	No seasonality	Low
-0.0594102417143707	-0.0586655778857363	500	0.04	7	No seasonality	Low
-0.0480295625183352	-0.0466527134928054	500	0.04	7	No seasonality	Low
-0.0258808022484618	-0.0240245298677967	500	0.04	7	No seasonality	Low
-0.0692576156124023	-0.071531617545843	500	0.04	7	No seasonality	Low
-0.0548178184021249	-0.0553124505809955	500	0.04	7	No seasonality	Low
-0.0111642300224653	-0.0129682407839255	500	0.04	7	No seasonality	Low
-0.0799012195264975	-0.0766902761401007	500	0.04	7	No seasonality	Low
0.00511451299513292	0.00572531515895531	500	0.04	7	No seasonality	Low
-0.0736502394411696	-0.0743454463970584	500	0.04	7	No seasonality	Low
-0.00216125623209931	0.00128676782716276	5	0.04	18	No seasonality	Low
-0.0358003776179492	-0.0395642029376695	5	0.04	18	No seasonality	Low
0.0112450041863893	0.0126654584993701	5	0.04	18	No seasonality	Low
-0.0312352300627317	-0.0242778475479521	5	0.04	18	No seasonality	Low
-0.0131545956109655	-0.012879582154827	5	0.04	18	No seasonality	Low
0.0305885601565219	0.0256787026270615	5	0.04	18	No seasonality	Low
0.0236169534518393	0.0221584133824264	5	0.04	18	No seasonality	Low
-0.0392135887822194	-0.0362137339418736	5	0.04	18	No seasonality	Low
0.000477498419969086	-0.0024075329204289	5	0.04	18	No seasonality	Low
-0.00793771363096771	-0.00826099161796766	5	0.04	18	No seasonality	Low
-0.0338113239114373	-0.0350847295319232	5	0.04	18	No seasonality	Low
-0.0387043698519818	-0.0375673717332158	5	0.04	18	No seasonality	Low
0.0097110896016692	0.00773798067948129	5	0.04	18	No seasonality	Low
0.0276159766407398	0.0262664294921475	5	0.04	18	No seasonality	Low
-0.0211875247623816	-0.0222908015157586	5	0.04	18	No seasonality	Low
-0.000683001292412099	-0.00101099326282796	5	0.04	18	No seasonality	Low
0.0136642747131563	0.0104473323964853	5	0.04	18	No seasonality	Low
-0.0384996681272937	-0.0441161603960687	5	0.04	18	No seasonality	Low
-0.0236712003945533	-0.0190289329269111	5	0.04	18	No seasonality	Low
-0.00687460860841993	-0.00428811313928779	5	0.04	18	No seasonality	Low
-0.00395243068009908	-0.00498022151554499	5	0.04	18	No seasonality	Low
0.00460663926197317	0.00486723718387257	5	0.04	18	No seasonality	Low
-0.0038223867778168	-0.00447999992055136	5	0.04	18	No seasonality	Low
-0.0399981311134396	-0.038060201083067	5	0.04	18	No seasonality	Low
-0.00209693392049301	0.00125769441158893	5	0.04	18	No seasonality	Low
-0.0299582433854579	-0.0286411181072875	5	0.04	18	No seasonality	Low
0.0256474170782897	0.0187345331703171	5	0.04	18	No seasonality	Low
0.0303831194939263	0.0288834707720789	5	0.04	18	No seasonality	Low
0.014906149765491	0.0175760742099182	5	0.04	18	No seasonality	Low
0.00509919310986176	0.000285086302898016	5	0.04	18	No seasonality	Low
-0.0246293133743927	-0.0229553384600712	5	0.04	18	No seasonality	Low
-0.0283949209942397	-0.0281335908209873	5	0.04	18	No seasonality	Low
-0.0414590717233331	-0.046017712767227	5	0.04	18	No seasonality	Low
-0.047375433400734	-0.039835292515984	5	0.04	18	No seasonality	Low
-0.0412551538759599	-0.0470381582493936	5	0.04	18	No seasonality	Low
0.00949765721252845	0.00839911778890121	5	0.04	18	No seasonality	Low
-0.0451676541981869	-0.0434021780240176	5	0.04	18	No seasonality	Low
-0.0413657835558172	-0.0411286006459134	5	0.04	18	No seasonality	Low
-0.0401672653233125	-0.0411250790054405	5	0.04	18	No seasonality	Low
-0.040016911332797	-0.0381841505878713	5	0.04	18	No seasonality	Low
-0.0524485810985004	-0.0485047046124314	5	0.04	18	No seasonality	Low
0.0150325855102716	0.014404629777164	5	0.04	18	No seasonality	Low
0.0262674923543841	0.0209033208574116	5	0.04	18	No seasonality	Low
-0.0248340084133226	-0.025815282141355	5	0.04	18	No seasonality	Low
-0.0277983772518113	-0.0264687897960314	5	0.04	18	No seasonality	Low
-0.0158190135029332	-0.010909202387402	10	0.04	18	No seasonality	Low
0.0170509272550776	0.0189540954293087	10	0.04	18	No seasonality	Low
-0.0157081090932307	-0.0135467115190294	10	0.04	18	No seasonality	Low
-0.0505650789854825	-0.0508827998312213	10	0.04	18	No seasonality	Low
-0.0154518298966402	-0.0175307811203463	10	0.04	18	No seasonality	Low
-0.0535557618844539	-0.0512375467804307	10	0.04	18	No seasonality	Low
-0.0180660895040198	-0.0149009922562235	10	0.04	18	No seasonality	Low
-0.009464687872041	-0.00783094034783005	10	0.04	18	No seasonality	Low
-0.0344562417866522	-0.0367553738069747	10	0.04	18	No seasonality	Low
0.0246363389008093	0.0225586651336671	10	0.04	18	No seasonality	Low
-0.0308297525671811	-0.0265486713444109	10	0.04	18	No seasonality	Low
-0.0174907363432403	-0.0159681386355157	10	0.04	18	No seasonality	Low
-0.00625661120521137	-0.0112882312519102	10	0.04	18	No seasonality	Low
0.00821046856893973	0.000512785401373214	10	0.04	18	No seasonality	Low
0.0177457228533932	0.0156996284539527	10	0.04	18	No seasonality	Low
-0.0352755545844545	-0.0271915081200937	10	0.04	18	No seasonality	Low
-0.00118261162909536	-0.00137405990679001	10	0.04	18	No seasonality	Low
-0.0204556467248697	-0.0159391426250949	10	0.04	18	No seasonality	Low
0.00852226851541031	0.0147187732905399	10	0.04	18	No seasonality	Low
-0.0186593092135342	-0.01617843290374	10	0.04	18	No seasonality	Low
-0.0263450363000281	-0.0273366465782234	10	0.04	18	No seasonality	Low
-0.047379609771249	-0.0469343158979345	10	0.04	18	No seasonality	Low
-0.0567119624426289	-0.0553749676179606	10	0.04	18	No seasonality	Low
-0.0313328690482345	-0.0260914689657904	10	0.04	18	No seasonality	Low
-0.0420774410671972	-0.0330539578450207	10	0.04	18	No seasonality	Low
0.00972874730172441	0.00751913042224585	10	0.04	18	No seasonality	Low
-0.0497501863488323	-0.0513840302668618	10	0.04	18	No seasonality	Low
-0.0117954840291971	-0.00716159295293959	10	0.04	18	No seasonality	Low
-0.0419336501284523	-0.0435716198906843	10	0.04	18	No seasonality	Low
-0.0439482131778704	-0.0435710316394129	10	0.04	18	No seasonality	Low
-0.0233699181087007	-0.0262898344110893	500	0.04	18	No seasonality	Low
-0.0181007540577312	-0.0163394123238483	500	0.04	18	No seasonality	Low
0.0109378193806413	0.0162458553438634	500	0.04	18	No seasonality	Low
-0.0686568734640043	-0.0659704863960596	500	0.04	18	No seasonality	Low
0.0016425407579534	-0.00115560978834149	500	0.04	18	No seasonality	Low
-0.0622092147956186	-0.0613004284094961	500	0.04	18	No seasonality	Low
-0.0444006541564707	-0.04610935947916	500	0.04	18	No seasonality	Low
0.0221640660128455	0.0177252688145897	500	0.04	18	No seasonality	Low
-0.0740123949545984	-0.0714824423851512	500	0.04	18	No seasonality	Low
-0.0649029796651838	-0.0581340520085669	500	0.04	18	No seasonality	Low
-0.0742677281261721	-0.0707140690961673	500	0.04	18	No seasonality	Low
-0.0191698645246776	-0.0191105929563567	500	0.04	18	No seasonality	Low
-0.0163851919852021	-0.0189186356672636	500	0.04	18	No seasonality	Low
-0.0104571496156597	-0.0120249990109944	500	0.04	18	No seasonality	Low
-0.0482271690971507	-0.0428924571136149	500	0.04	18	No seasonality	Low
0.0118733340495085	0.00986789933075893	500	0.04	18	No seasonality	Low
-0.0605024487993919	-0.0594076338263055	500	0.04	18	No seasonality	Low
-0.0425048705563232	-0.0436769101550995	500	0.04	18	No seasonality	Low
0.0098854335446658	0.0073676541782866	500	0.04	18	No seasonality	Low
0.0127596285167829	0.0144239594004991	500	0.04	18	No seasonality	Low
-0.00111055634483027	0.00148383467582648	500	0.04	18	No seasonality	Low
0.0171161688150717	0.0168731339438906	500	0.04	18	No seasonality	Low
-0.0144348433165491	-0.0146329414378804	500	0.04	18	No seasonality	Low
-0.0710992186711272	-0.0688899949578498	500	0.04	18	No seasonality	Low
-0.0199842606389159	-0.0192464919629999	500	0.04	18	No seasonality	Low
-0.0733130632792719	-0.0694478927937041	500	0.04	18	No seasonality	Low
-0.00508872603070627	-0.00497414256817059	500	0.04	18	No seasonality	Low
0.00825063534822651	0.0108876409164181	500	0.04	18	No seasonality	Low
-0.0319301566148909	-0.0310866769115047	500	0.04	18	No seasonality	Low
-0.0612397521901402	-0.0648088596145514	500	0.04	18	No seasonality	Low
0.00383281195759283	-0.00136996894341174	5	0.04	7	No seasonality	High
0.0172328971304503	0.0159216145656793	5	0.04	7	No seasonality	High
-0.0194394953887252	-0.0167920187087452	5	0.04	7	No seasonality	High
0.0174675880281153	0.0200125176168059	5	0.04	7	No seasonality	High
-0.0211373389956349	-0.0228673601759436	5	0.04	7	No seasonality	High
-0.00299978210164719	-0.00546244464869834	5	0.04	7	No seasonality	High
0.00495975594538058	0.00610185660377645	5	0.04	7	No seasonality	High
0.00443993937212461	-0.00983644042749482	5	0.04	7	No seasonality	High
0.0220355981832747	0.0281710775074409	5	0.04	7	No seasonality	High
-0.0148093798031241	-0.0168780545644698	5	0.04	7	No seasonality	High
0.00682467255854501	0.0031020370794366	5	0.04	7	No seasonality	High
-0.00100928966556422	-0.00876163114129594	5	0.04	7	No seasonality	High
-0.0392732051511678	-0.036201300441144	5	0.04	7	No seasonality	High
-0.062851855247666	-0.0520845147634309	5	0.04	7	No seasonality	High
0.0219056413225284	0.0150995882442482	5	0.04	7	No seasonality	High
-0.0243152656392677	-0.0200470602696168	5	0.04	7	No seasonality	High
-0.0266885976793967	-0.0271313069518587	5	0.04	7	No seasonality	High
-0.0683215254802118	-0.0558627578802448	5	0.04	7	No seasonality	High
-0.0188079130406706	-0.019205648370843	5	0.04	7	No seasonality	High
-0.0536440414065119	-0.0502179429330145	5	0.04	7	No seasonality	High
-0.0390862326161003	-0.0426950317648861	5	0.04	7	No seasonality	High
-0.0238328245171271	-0.0207696180910717	5	0.04	7	No seasonality	High
0.0262447831343702	0.0223236242882591	5	0.04	7	No seasonality	High
-0.00207972552039317	0.00152032498628459	5	0.04	7	No seasonality	High
0.0048688517988961	0.0111050538253102	5	0.04	7	No seasonality	High
0.00529331694685774	0.00887085046759269	5	0.04	7	No seasonality	High
-0.00637280754461224	-0.00446348284313822	5	0.04	7	No seasonality	High
-0.0386394287116455	-0.039768008641853	5	0.04	7	No seasonality	High
0.000920300963900447	0.00233017450887526	5	0.04	7	No seasonality	High
0.021854295744684	0.0108421646227046	5	0.04	7	No seasonality	High
-0.030692101401848	-0.0336728404723894	10	0.04	7	No seasonality	High
-0.0532481625431453	-0.0541505742756608	10	0.04	7	No seasonality	High
-0.0137260962907409	-0.0109355815874787	10	0.04	7	No seasonality	High
0.00243211138407931	0.00500868266936971	10	0.04	7	No seasonality	High
-0.0639295088158001	-0.0627307388271796	10	0.04	7	No seasonality	High
0.00901610019562936	0.00979068210433709	10	0.04	7	No seasonality	High
-0.0241972608419908	-0.0270177452769038	10	0.04	7	No seasonality	High
-0.0262226112170664	-0.0302119999380688	10	0.04	7	No seasonality	High
-0.036278470927287	-0.0350968073378351	10	0.04	7	No seasonality	High
-0.0202181003737837	-0.020539268395658	10	0.04	7	No seasonality	High
-0.0176622721075877	-0.0161369732564626	10	0.04	7	No seasonality	High
0.0182266909556388	0.014107366311601	10	0.04	7	No seasonality	High
-0.0513250455819805	-0.0543467210937641	10	0.04	7	No seasonality	High
-0.0284301993192925	-0.0303368491481561	10	0.04	7	No seasonality	High
-0.06399446256387	-0.058692084335472	10	0.04	7	No seasonality	High
-0.0630591432546757	-0.0579096969810631	10	0.04	7	No seasonality	High
-0.0277236022554703	-0.025737310013161	10	0.04	7	No seasonality	High
-0.0244176799195189	-0.0259955809872801	10	0.04	7	No seasonality	High
0.0165374621930792	0.0158429764379662	10	0.04	7	No seasonality	High
-0.0555248766424514	-0.0546466319606397	10	0.04	7	No seasonality	High
-0.0500874302736623	-0.0499312870633852	10	0.04	7	No seasonality	High
-0.0327837248908121	-0.0338826357658056	10	0.04	7	No seasonality	High
0.0146864881338812	0.0185180342869456	10	0.04	7	No seasonality	High
-0.0522513927431584	-0.0530754234712385	10	0.04	7	No seasonality	High
-0.0489447944185362	-0.0468003763064191	10	0.04	7	No seasonality	High
-0.0509077966527153	-0.0510914093358188	10	0.04	7	No seasonality	High
-0.0634132314221059	-0.054699490505281	10	0.04	7	No seasonality	High
-0.0474029553291442	-0.052668880619962	10	0.04	7	No seasonality	High
-0.0534610116750772	-0.0501224376486444	10	0.04	7	No seasonality	High
-0.0124047058866529	-0.0116733564423412	10	0.04	7	No seasonality	High
-0.0223996899668267	-0.0243686719186696	500	0.04	7	No seasonality	High
-0.00352090443146036	-0.00954799121354795	500	0.04	7	No seasonality	High
-0.050546873275964	-0.0511673492125943	500	0.04	7	No seasonality	High
-0.0678501031253384	-0.0676546454289432	500	0.04	7	No seasonality	High
-0.00474673415171028	-0.000231415249912985	500	0.04	7	No seasonality	High
-0.0496726571006176	-0.0493937357955851	500	0.04	7	No seasonality	High
-0.0624227447845834	-0.0635385222060213	500	0.04	7	No seasonality	High
-0.0454694465881992	-0.0436076194527482	500	0.04	7	No seasonality	High
-0.0830165153143035	-0.0886575211546077	500	0.04	7	No seasonality	High
0.000635455725098769	-0.000700641234485294	500	0.04	7	No seasonality	High
-0.00537866055114298	-0.00866006448599992	500	0.04	7	No seasonality	High
-0.0810776760447914	-0.079674527558274	500	0.04	7	No seasonality	High
-0.0166955075098197	-0.0167343168141962	500	0.04	7	No seasonality	High
-0.0538623665327211	-0.0598980208025187	500	0.04	7	No seasonality	High
-0.0502911276715958	-0.0468474165846632	500	0.04	7	No seasonality	High
-0.0618689845909789	-0.0585091938207171	500	0.04	7	No seasonality	High
0.00892450390337473	0.00613129362168306	500	0.04	7	No seasonality	High
0.00109757920380991	-0.00193724197019201	500	0.04	7	No seasonality	High
-0.0224518872511634	-0.0198738226153754	500	0.04	7	No seasonality	High
-0.00557940020521858	-0.00849183825204184	500	0.04	7	No seasonality	High
0.0159641027726424	0.00887839966115772	500	0.04	7	No seasonality	High
0.0131437830051389	0.0155616054581994	500	0.04	7	No seasonality	High
-0.0285408554925395	-0.0280066103745676	500	0.04	7	No seasonality	High
-0.0512525260897567	-0.0525958105478329	500	0.04	7	No seasonality	High
-0.0399968406500219	-0.0508597764717443	500	0.04	7	No seasonality	High
-0.0725827765802777	-0.0779842349592307	500	0.04	7	No seasonality	High
-0.0700121315227298	-0.0676450433798675	500	0.04	7	No seasonality	High
-0.0657629617995244	-0.0693355556837108	500	0.04	7	No seasonality	High
-0.0089306427981185	-0.0134246938408887	500	0.04	7	No seasonality	High
-0.0713487245355725	-0.0755199253546611	500	0.04	7	No seasonality	High
0.0175571744640541	0.0227179861624848	5	0.04	18	No seasonality	High
-0.0116062702959375	-0.00921873092927827	5	0.04	18	No seasonality	High
-0.015369769193391	-0.0133576263248816	5	0.04	18	No seasonality	High
-0.0191094137399141	-0.0183400321118764	5	0.04	18	No seasonality	High
-0.0295911093771065	-0.0280351758160436	5	0.04	18	No seasonality	High
-0.0563103937862486	-0.0579590302496087	5	0.04	18	No seasonality	High
0.0111565226718931	0.00971886727655609	5	0.04	18	No seasonality	High
-0.0332410556908102	-0.0330456039145379	5	0.04	18	No seasonality	High
0.00290768300021077	0.00561359713274308	5	0.04	18	No seasonality	High
-0.0331905558538248	-0.0407699194100496	5	0.04	18	No seasonality	High
-0.0103377912856324	-0.00788421462492871	5	0.04	18	No seasonality	High
-0.0186032426868056	-0.0172241024414977	5	0.04	18	No seasonality	High
-0.0158871933329709	-0.0158421983910174	5	0.04	18	No seasonality	High
-0.0294093921154915	-0.0284377965657746	5	0.04	18	No seasonality	High
-0.00158084724334989	-0.00527900868842199	5	0.04	18	No seasonality	High
-0.0238955299718349	-0.0153737424837943	5	0.04	18	No seasonality	High
0.0194245274293985	0.0203869526928401	5	0.04	18	No seasonality	High
0.00889407284591771	0.00989643282483477	5	0.04	18	No seasonality	High
-0.0485192504253416	-0.0450878396152652	5	0.04	18	No seasonality	High
0.0129333863904958	0.012756717273289	5	0.04	18	No seasonality	High
-0.0244590124051432	-0.0235413623851494	5	0.04	18	No seasonality	High
-0.0155842178057547	-0.0136261929089339	5	0.04	18	No seasonality	High
-0.0385268870913614	-0.0383660288570196	5	0.04	18	No seasonality	High
-0.0177590883497248	-0.01335751956168	5	0.04	18	No seasonality	High
0.0260887728922467	0.0248191023955405	5	0.04	18	No seasonality	High
-0.0195275267088731	-0.0187445431988741	5	0.04	18	No seasonality	High
0.0101191787651255	0.0107874177071233	5	0.04	18	No seasonality	High
-0.0106398902065557	-0.0092920907895902	5	0.04	18	No seasonality	High
-0.00810296159046142	-0.0106780215902875	5	0.04	18	No seasonality	High
-0.0411115361091984	-0.0354870461783876	5	0.04	18	No seasonality	High
-0.00918514337957201	-0.012622998448686	10	0.04	18	No seasonality	High
-0.0252661283732388	-0.0236475754127347	10	0.04	18	No seasonality	High
-0.0411293641755172	-0.0391072571320112	10	0.04	18	No seasonality	High
0.0222337208112964	0.0177999971596456	10	0.04	18	No seasonality	High
-0.0217440287991202	-0.0232109268443638	10	0.04	18	No seasonality	High
-0.0259748855225955	-0.0268171276917918	10	0.04	18	No seasonality	High
-0.0391990104112984	-0.0399628190526594	10	0.04	18	No seasonality	High
-0.0200500031706315	-0.0168024368419282	10	0.04	18	No seasonality	High
-0.0500844198171173	-0.0495123854294385	10	0.04	18	No seasonality	High
0.0123010411341149	0.00990822933540066	10	0.04	18	No seasonality	High
-0.0373917964349525	-0.0366969282479775	10	0.04	18	No seasonality	High
0.0189456804052098	0.0191146389575693	10	0.04	18	No seasonality	High
-0.00957631348232202	-0.00900857390821014	10	0.04	18	No seasonality	High
-0.0209734890923422	-0.0248546407370341	10	0.04	18	No seasonality	High
-0.0040535831545687	-0.00320047186667805	10	0.04	18	No seasonality	High
-0.01572646651197	-0.0139153990710461	10	0.04	18	No seasonality	High
-0.038040852705836	-0.0357674179844172	10	0.04	18	No seasonality	High
-0.0371969480770185	-0.0362582716641953	10	0.04	18	No seasonality	High
-0.0619047844613698	-0.0595589674118826	10	0.04	18	No seasonality	High
-0.0240175277719924	-0.0190777761204515	10	0.04	18	No seasonality	High
-0.0527245453271507	-0.0509358879132631	10	0.04	18	No seasonality	High
0.0230695505561845	0.0199022605353337	10	0.04	18	No seasonality	High
-0.0324326013730922	-0.0308569752195354	10	0.04	18	No seasonality	High
0.00433844619606973	0.00371172779939235	10	0.04	18	No seasonality	High
0.0204539086419038	0.014205138372969	10	0.04	18	No seasonality	High
-0.00628814406242174	-0.00578385599987186	10	0.04	18	No seasonality	High
0.00164206502632657	0.00370783244255524	10	0.04	18	No seasonality	High
-0.0375308740968362	-0.0421102570111461	10	0.04	18	No seasonality	High
-0.0512360630908952	-0.0548352955532824	10	0.04	18	No seasonality	High
0.0241324976642445	0.0189771756971572	10	0.04	18	No seasonality	High
-0.026116258938737	-0.0260809541207895	500	0.04	18	No seasonality	High
-0.0211976590593306	-0.0211076535113318	500	0.04	18	No seasonality	High
-0.00888004693257389	-0.00792378729143621	500	0.04	18	No seasonality	High
-0.0618930647009426	-0.0635723204891337	500	0.04	18	No seasonality	High
-0.0461537670250198	-0.0438348231182923	500	0.04	18	No seasonality	High
-0.0391801896775978	-0.0407666131495557	500	0.04	18	No seasonality	High
-0.0437821057898641	-0.0400696976930474	500	0.04	18	No seasonality	High
-0.0572175954912211	-0.0538338883933691	500	0.04	18	No seasonality	High
-0.0229722683848288	-0.0208561687088519	500	0.04	18	No seasonality	High
-0.0592243553582053	-0.0573629164573279	500	0.04	18	No seasonality	High
-0.022507971946115	-0.0225501709620081	500	0.04	18	No seasonality	High
-0.0617744846939056	-0.0625161294716055	500	0.04	18	No seasonality	High
-0.0372148177403827	-0.0401053597044173	500	0.04	18	No seasonality	High
-0.0127017713757633	-0.0143429826250928	500	0.04	18	No seasonality	High
-0.0795873203945766	-0.0823026963397079	500	0.04	18	No seasonality	High
-0.0550975978574811	-0.0578525750561615	500	0.04	18	No seasonality	High
-0.0364407886133343	-0.0362644094286369	500	0.04	18	No seasonality	High
-0.0640784647213397	-0.0593092630276371	500	0.04	18	No seasonality	High
-0.0751970534603553	-0.073236481096194	500	0.04	18	No seasonality	High
-0.0366814270641745	-0.0362219108957641	500	0.04	18	No seasonality	High
-0.045313270830002	-0.0422514994875691	500	0.04	18	No seasonality	High
0.0156523264881526	0.0147500694742096	500	0.04	18	No seasonality	High
-0.0798918234706429	-0.0804663905549269	500	0.04	18	No seasonality	High
-0.0957963924150626	-0.0941642279132917	500	0.04	18	No seasonality	High
-0.046529788900661	-0.0509942175646325	500	0.04	18	No seasonality	High
-0.0754337148865276	-0.0706526327663463	500	0.04	18	No seasonality	High
-0.0619050405010491	-0.0624741150503476	500	0.04	18	No seasonality	High
-0.0458595339731357	-0.0490443829040946	500	0.04	18	No seasonality	High
-0.0408757603946393	-0.0386438805166927	500	0.04	18	No seasonality	High
-0.066027146651067	-0.064755117680605	500	0.04	18	No seasonality	High
0.0260742948343579	0.025634999001465	5	0.04	7	Seasonality	Low
0.0226242686360858	0.0335936442196598	5	0.04	7	Seasonality	Low
0.0303736456389304	0.0384955178890149	5	0.04	7	Seasonality	Low
-0.000450797972803462	-0.0038557764842828	5	0.04	7	Seasonality	Low
0.00311364541255508	0.00772270028342075	5	0.04	7	Seasonality	Low
0.00379418051067021	0.0185396457635592	5	0.04	7	Seasonality	Low
0.00312115628864044	-0.00354607662346524	5	0.04	7	Seasonality	Low
-0.0258932515482525	-0.0214995407476302	5	0.04	7	Seasonality	Low
0.0243437527322739	0.0244961522267029	5	0.04	7	Seasonality	Low
0.0133345001575736	0.0199827191027637	5	0.04	7	Seasonality	Low
-0.0251745940857858	-0.0250662509689518	5	0.04	7	Seasonality	Low
0.00551799818067606	0.00526866479838659	5	0.04	7	Seasonality	Low
0.020651688361161	0.0251179075816237	5	0.04	7	Seasonality	Low
-0.00159018329031388	-0.010972190077831	5	0.04	7	Seasonality	Low
-0.00156649444281097	0.000711313331878214	5	0.04	7	Seasonality	Low
0.023032772627781	0.0255149761886759	5	0.04	7	Seasonality	Low
0.0133076864545249	0.0102963148895277	5	0.04	7	Seasonality	Low
0.00880994002924312	0.0235246176532726	5	0.04	7	Seasonality	Low
-0.0186432912943861	-0.0218210523875384	5	0.04	7	Seasonality	Low
0.00746923145056335	0.00437071269045311	5	0.04	7	Seasonality	Low
0.0403701145629045	0.0420965413571204	5	0.04	7	Seasonality	Low
0.00872921381879108	0.0177755829093925	5	0.04	7	Seasonality	Low
0.0268426315880283	0.0334594613323696	5	0.04	7	Seasonality	Low
0.00624441825342335	0.0133764149040133	5	0.04	7	Seasonality	Low
0.0105356159535303	0.00877260573343824	5	0.04	7	Seasonality	Low
-0.0246704086725119	-0.0239979114735818	5	0.04	7	Seasonality	Low
-0.0398811816997406	-0.0359007321222811	5	0.04	7	Seasonality	Low
-0.0102186424847779	-0.00702003389366283	5	0.04	7	Seasonality	Low
-0.0279045635550155	-0.0293909457104346	5	0.04	7	Seasonality	Low
-0.0120179029057088	-0.00877960371986427	5	0.04	7	Seasonality	Low
-0.0269398984295691	-0.0256590978948143	5	0.04	7	Seasonality	Low
-0.0296413194820545	-0.0206222782028745	5	0.04	7	Seasonality	Low
-0.0671456338857194	-0.0541090085630169	5	0.04	7	Seasonality	Low
-0.0271690837655059	-0.026192406373415	5	0.04	7	Seasonality	Low
-0.00456201734733537	-0.00976598321427459	5	0.04	7	Seasonality	Low
-0.0240341300090942	-0.0236232289085634	5	0.04	7	Seasonality	Low
-0.000252964862984467	0.0103329878953671	5	0.04	7	Seasonality	Low
-0.0628737021996561	-0.0487950472924805	5	0.04	7	Seasonality	Low
0.00418878080830487	0.0162176069146941	5	0.04	7	Seasonality	Low
-0.0284566475548636	-0.0292589490220997	5	0.04	7	Seasonality	Low
0.0236200376739423	0.0235527449942781	5	0.04	7	Seasonality	Low
0.0151881152307096	0.0282149010209314	5	0.04	7	Seasonality	Low
0.0383456086371445	0.0288081989263395	5	0.04	7	Seasonality	Low
-0.00045068120037758	0.00400878268357856	5	0.04	7	Seasonality	Low
0.019171737695422	0.0118973617148381	5	0.04	7	Seasonality	Low
-0.018246576797313	-0.0190296442168456	5	0.04	7	Seasonality	Low
-0.0239474379691073	-0.0296206365973135	5	0.04	7	Seasonality	Low
-0.0277909733587177	-0.0208910690619098	5	0.04	7	Seasonality	Low
-0.0273303130191997	-0.0244092384489866	5	0.04	7	Seasonality	Low
-0.0289640242111683	-0.0310036679976321	5	0.04	7	Seasonality	Low
-0.0177106540308958	-0.0279777362693172	5	0.04	7	Seasonality	Low
-0.0227452046231727	-0.0282039870700997	5	0.04	7	Seasonality	Low
-0.0183271745847102	-0.0189939516138416	5	0.04	7	Seasonality	Low
-0.0306816113141755	-0.022401413602941	5	0.04	7	Seasonality	Low
-0.0287495181519355	-0.0290699677100705	5	0.04	7	Seasonality	Low
0.0293147598878499	0.0302564094360198	5	0.04	7	Seasonality	Low
-0.015029447013551	-0.0178556569675751	5	0.04	7	Seasonality	Low
-0.0511686047748081	-0.0440561482837771	5	0.04	7	Seasonality	Low
-0.0150537800171356	-0.0073992356719315	5	0.04	7	Seasonality	Low
-0.0331285700980179	-0.0250921038484176	5	0.04	7	Seasonality	Low
-0.0661376680582881	-0.0478599766809092	5	0.04	7	Seasonality	Low
0.0380646563167356	0.0293478885622209	5	0.04	7	Seasonality	Low
-0.000257417924428143	0.00675618780428637	5	0.04	7	Seasonality	Low
-0.029965318801571	-0.0240393365778515	5	0.04	7	Seasonality	Low
0.0273208546448815	0.0238399098971432	5	0.04	7	Seasonality	Low
-0.0226622161569342	-0.0306375665835948	5	0.04	7	Seasonality	Low
-0.000776036622792252	-0.00529343290754605	5	0.04	7	Seasonality	Low
-0.041465988223875	-0.0209789424951689	5	0.04	7	Seasonality	Low
-0.0192865554237457	-0.0214174917659994	5	0.04	7	Seasonality	Low
-0.0275439346592543	-0.0283514731781516	5	0.04	7	Seasonality	Low
0.0313629791108484	0.0275580548953072	5	0.04	7	Seasonality	Low
-0.0288203628018666	-0.0332694807022566	5	0.04	7	Seasonality	Low
-0.0466798366361496	-0.0453393725692499	5	0.04	7	Seasonality	Low
-0.0380588409669019	-0.0277921278621446	5	0.04	7	Seasonality	Low
-0.0295195632729064	-0.0307112937701292	5	0.04	7	Seasonality	Low
-0.022472646784272	-0.0375915433475052	5	0.04	7	Seasonality	Low
0.00940910680567519	0.0172466008393288	5	0.04	7	Seasonality	Low
-0.0250740658759258	-0.021022974346041	5	0.04	7	Seasonality	Low
-0.0612351572354342	-0.0464964135539823	5	0.04	7	Seasonality	Low
-0.0255770167954965	-0.0230393332591783	5	0.04	7	Seasonality	Low
-0.0332936866933841	-0.0270773272819194	5	0.04	7	Seasonality	Low
-0.0269077682555059	-0.0170945821065694	5	0.04	7	Seasonality	Low
-0.0339226109681567	-0.0246122700625381	5	0.04	7	Seasonality	Low
0.0347087826636991	0.0317600519592894	5	0.04	7	Seasonality	Low
-0.0244220436341297	-0.0252761939708815	5	0.04	7	Seasonality	Low
-0.0286080401235246	-0.025903339601191	10	0.04	7	Seasonality	Low
0.0219901862234106	0.0184896578288142	10	0.04	7	Seasonality	Low
-0.0203022281920089	-0.0109683619153719	10	0.04	7	Seasonality	Low
0.00917582149029485	0.0131940350660885	10	0.04	7	Seasonality	Low
-0.0475334456943083	-0.030472641996636	10	0.04	7	Seasonality	Low
-0.0155638641032148	-0.0165013034842258	10	0.04	7	Seasonality	Low
0.00856078502625499	0.0137768422735782	10	0.04	7	Seasonality	Low
-0.0365613978531378	-0.0394256620949407	10	0.04	7	Seasonality	Low
0.0187914387638928	0.0210185988173502	10	0.04	7	Seasonality	Low
-0.0137149991554096	-0.00501971123603275	10	0.04	7	Seasonality	Low
-0.0452930343591962	-0.0484661533684678	10	0.04	7	Seasonality	Low
-0.0384102776093444	-0.0400449713416626	10	0.04	7	Seasonality	Low
0.0033692162692534	-0.00601373503873872	10	0.04	7	Seasonality	Low
0.0270426361592053	0.0269022934489515	10	0.04	7	Seasonality	Low
0.0153370947697807	0.00492727053147932	10	0.04	7	Seasonality	Low
0.0058517898253328	0.00745939609984201	10	0.04	7	Seasonality	Low
0.0282014384790553	0.017346277145727	10	0.04	7	Seasonality	Low
0.00140008488705914	0.000571767851649342	10	0.04	7	Seasonality	Low
-0.0144874580845372	-0.0173015680497379	10	0.04	7	Seasonality	Low
-0.00152129329664114	0.000360420668587415	10	0.04	7	Seasonality	Low
0.0128258594295829	0.0165413202780501	10	0.04	7	Seasonality	Low
-0.0411556139316803	-0.0526903485182711	10	0.04	7	Seasonality	Low
0.0269518398905178	0.0384397820896826	10	0.04	7	Seasonality	Low
-0.0152832370341425	-0.00838644817660474	10	0.04	7	Seasonality	Low
-0.0513188868381025	-0.0412169479515651	10	0.04	7	Seasonality	Low
-0.0217333762990874	-0.0232252964947646	10	0.04	7	Seasonality	Low
0.00612435356254096	0.00665003747657098	10	0.04	7	Seasonality	Low
-0.05079260902956	-0.0462046572167305	10	0.04	7	Seasonality	Low
-0.0455165745301391	-0.0509120916239669	10	0.04	7	Seasonality	Low
-0.0591463153921056	-0.048268522413676	10	0.04	7	Seasonality	Low
-0.0491658924228719	-0.0469438579082362	10	0.04	7	Seasonality	Low
-0.0515819795662408	-0.0462931680893464	10	0.04	7	Seasonality	Low
-0.0424312936169191	-0.0392529063916238	10	0.04	7	Seasonality	Low
-0.0651937413864151	-0.0514144802835869	10	0.04	7	Seasonality	Low
-0.044668558105218	-0.0464854144062927	10	0.04	7	Seasonality	Low
-0.0412767721568097	-0.0436691374002581	10	0.04	7	Seasonality	Low
-0.0461923384458046	-0.0506468043890571	10	0.04	7	Seasonality	Low
-0.0510416142316848	-0.0552533245490112	10	0.04	7	Seasonality	Low
-0.0599732843405681	-0.0643485623887436	10	0.04	7	Seasonality	Low
-0.0355126940500769	-0.0418321531400665	10	0.04	7	Seasonality	Low
-0.0426206135191532	-0.0381216700303543	10	0.04	7	Seasonality	Low
-0.0403906399127616	-0.0475187413550455	10	0.04	7	Seasonality	Low
-0.0456104076397903	-0.0452529017992084	10	0.04	7	Seasonality	Low
-0.0424484114316386	-0.0447358152684087	10	0.04	7	Seasonality	Low
0.0317832715594647	0.0260133783014302	10	0.04	7	Seasonality	Low
-0.0763853596506461	-0.0547858028651192	10	0.04	7	Seasonality	Low
-0.0510014383420023	-0.0464988688930661	10	0.04	7	Seasonality	Low
-0.0193388688085464	-0.0191875763989711	10	0.04	7	Seasonality	Low
-0.043121106473222	-0.0439707577850138	10	0.04	7	Seasonality	Low
-0.0497908101491499	-0.0565014048599376	10	0.04	7	Seasonality	Low
-0.0241714100488942	-0.0291842370245845	500	0.04	7	Seasonality	Low
-0.0446813027977055	-0.0455208491682385	500	0.04	7	Seasonality	Low
-0.0163615442064391	-0.0152194294174717	500	0.04	7	Seasonality	Low
-0.0185537568706357	-0.0137434502991127	500	0.04	7	Seasonality	Low
-0.0647014890123057	-0.0581774690668872	500	0.04	7	Seasonality	Low
-0.00476817276511553	-0.00301233689604094	500	0.04	7	Seasonality	Low
-0.0663625747095504	-0.0666378941431933	500	0.04	7	Seasonality	Low
0.0182642142941418	0.015731644112547	500	0.04	7	Seasonality	Low
0.000391426165904539	-0.00183671572993029	500	0.04	7	Seasonality	Low
-0.00816391032828425	-0.00421249515862948	500	0.04	7	Seasonality	Low
0.0215870462790378	0.0162306622141278	500	0.04	7	Seasonality	Low
-0.0297881285707706	-0.031251118819767	500	0.04	7	Seasonality	Low
-0.00366316308865667	-0.00639871096033982	500	0.04	7	Seasonality	Low
-0.0417059979852334	-0.0339860518865931	500	0.04	7	Seasonality	Low
-0.0552647799671308	-0.0654158745236213	500	0.04	7	Seasonality	Low
0.0162232686414158	0.015235686921283	500	0.04	7	Seasonality	Low
0.00166395629694912	0.001950111801564	500	0.04	7	Seasonality	Low
-0.0519804474271157	-0.0570504248542305	500	0.04	7	Seasonality	Low
-0.0293307797075075	-0.0283294978696429	500	0.04	7	Seasonality	Low
-0.0602352199127541	-0.0574427118624908	500	0.04	7	Seasonality	Low
-0.00848794117403137	-0.00603651215491541	500	0.04	7	Seasonality	Low
0.0117656648556815	0.0180004850739001	500	0.04	7	Seasonality	Low
-0.0035085706913651	-0.0044662613419477	500	0.04	7	Seasonality	Low
-0.0188930755534362	-0.0193503061530082	500	0.04	7	Seasonality	Low
-0.0698743078215256	-0.0670381075136578	500	0.04	7	Seasonality	Low
0.00387550460489993	0.00232383115380022	500	0.04	7	Seasonality	Low
-0.00848932928790538	-0.011270913335681	500	0.04	7	Seasonality	Low
-0.0734542019593577	-0.0686354735715429	500	0.04	7	Seasonality	Low
-0.0318918277862717	-0.0307231047466577	500	0.04	7	Seasonality	Low
-0.0680338466278923	-0.0647204672510889	500	0.04	7	Seasonality	Low
-0.0323604926575703	-0.0279862802560338	5	0.04	18	Seasonality	Low
0.0259545282857502	0.020420645520953	5	0.04	18	Seasonality	Low
-0.00262197186568452	-0.00436390623149187	5	0.04	18	Seasonality	Low
-0.0110315582208842	-0.0193489586044254	5	0.04	18	Seasonality	Low
0.00416576404565069	0.000467976128379463	5	0.04	18	Seasonality	Low
0.03052625794033	0.028176008408652	5	0.04	18	Seasonality	Low
0.00013769586128404	0.00271223202631628	5	0.04	18	Seasonality	Low
-0.012479846785728	-0.0107127426095267	5	0.04	18	Seasonality	Low
-0.0127101210978278	-0.0121560376255355	5	0.04	18	Seasonality	Low
0.00495939763734348	0.0131501463165107	5	0.04	18	Seasonality	Low
-0.0259832789887296	-0.0181702764025254	5	0.04	18	Seasonality	Low
-0.0075836376973392	-0.000858388590069493	5	0.04	18	Seasonality	Low
0.00350537261733676	0.00534683337390884	5	0.04	18	Seasonality	Low
0.0101716863123966	0.0167585217198595	5	0.04	18	Seasonality	Low
0.021051629188199	0.0225829331382961	5	0.04	18	Seasonality	Low
-0.00747192739256171	-0.0109665098624393	5	0.04	18	Seasonality	Low
-0.000326782832692024	0.00161864606491855	5	0.04	18	Seasonality	Low
-0.0302982859605265	-0.0352076191424815	5	0.04	18	Seasonality	Low
0.00867664853626768	0.00711515223008752	5	0.04	18	Seasonality	Low
0.000528644891485022	-0.00134175396731878	5	0.04	18	Seasonality	Low
-0.0157369417036831	-0.018798708997387	5	0.04	18	Seasonality	Low
0.00450107367329225	0.0094967002284783	5	0.04	18	Seasonality	Low
-0.00498600126714239	-0.00566091117061323	5	0.04	18	Seasonality	Low
0.0213304522441843	0.0256451830238656	5	0.04	18	Seasonality	Low
0.0101850947086486	0.00838665348179717	5	0.04	18	Seasonality	Low
-0.0202399138502771	-0.0155478757057605	5	0.04	18	Seasonality	Low
0.0415243461202361	0.0285531199035004	5	0.04	18	Seasonality	Low
0.000556766424944194	0.00129100462901273	5	0.04	18	Seasonality	Low
-0.0187535128338425	-0.016545549638988	5	0.04	18	Seasonality	Low
-0.00875288540253122	-0.00794694841129066	5	0.04	18	Seasonality	Low
-0.0271932399216149	-0.0269180355627674	5	0.04	18	Seasonality	Low
0.0301751877359302	0.0320364395923404	5	0.04	18	Seasonality	Low
0.00155600154783789	0.00890419209738466	5	0.04	18	Seasonality	Low
0.0116097140160385	0.00744393264787939	5	0.04	18	Seasonality	Low
-0.0136205991875528	-0.0169975767923466	5	0.04	18	Seasonality	Low
-0.0226858200143432	-0.0161167844305996	5	0.04	18	Seasonality	Low
0.0329193585199377	0.029176004161714	5	0.04	18	Seasonality	Low
-0.0267714887451822	-0.0260318101191051	5	0.04	18	Seasonality	Low
-0.0269703140637899	-0.0206383387247309	5	0.04	18	Seasonality	Low
0.0349299780059682	0.0324002415138437	5	0.04	18	Seasonality	Low
-0.020967693139969	-0.0257393831493755	5	0.04	18	Seasonality	Low
0.0189417382719793	0.0241350376344578	5	0.04	18	Seasonality	Low
0.0211251845061209	0.0260191194593319	5	0.04	18	Seasonality	Low
0.0330462008832719	0.0267192247446261	5	0.04	18	Seasonality	Low
0.0329566013516636	0.0360243271341087	5	0.04	18	Seasonality	Low
-0.0344929675785681	-0.0248332407077676	5	0.04	18	Seasonality	Low
-0.0277041919143552	-0.0219068520325112	5	0.04	18	Seasonality	Low
-0.017176127439897	-0.0194124334429289	5	0.04	18	Seasonality	Low
-0.030512694970388	-0.0300376944926505	5	0.04	18	Seasonality	Low
0.0345698609898372	0.0313455699027151	5	0.04	18	Seasonality	Low
-0.028485819121377	-0.033539669415653	5	0.04	18	Seasonality	Low
-0.036295111386489	-0.0317484576679247	5	0.04	18	Seasonality	Low
-0.0339936234720029	-0.0283856768831246	5	0.04	18	Seasonality	Low
0.0322554449015899	0.0361389988973405	5	0.04	18	Seasonality	Low
-0.0320438184687358	-0.0328599846210773	5	0.04	18	Seasonality	Low
-0.0598206974598775	-0.0630712155671766	5	0.04	18	Seasonality	Low
-0.0287867745654291	-0.0312605246383516	5	0.04	18	Seasonality	Low
0.0411659760601436	0.0399661732661097	5	0.04	18	Seasonality	Low
0.00645514847206067	0.0105407182084317	5	0.04	18	Seasonality	Low
-0.0342703393417439	-0.0433027681481613	5	0.04	18	Seasonality	Low
0.01773261226137	0.012214178504522	5	0.04	18	Seasonality	Low
-0.0226562096854769	-0.0378747942607593	5	0.04	18	Seasonality	Low
-0.0284424045911552	-0.0324938782811627	5	0.04	18	Seasonality	Low
-0.0301033103791522	-0.0202137398352968	5	0.04	18	Seasonality	Low
0.0378084434928001	0.0233423399316989	5	0.04	18	Seasonality	Low
-0.0568683699168268	-0.0548192562253181	5	0.04	18	Seasonality	Low
-0.0255737479835992	-0.0292834034441899	5	0.04	18	Seasonality	Low
-0.0250903861383781	-0.0240991564234902	5	0.04	18	Seasonality	Low
0.00943371332479472	-0.0002585460097924	5	0.04	18	Seasonality	Low
-0.0562674832828056	-0.0486188112849115	5	0.04	18	Seasonality	Low
-0.0492909070612256	-0.0324982413597272	5	0.04	18	Seasonality	Low
-0.0237358111206477	-0.0324378372058558	5	0.04	18	Seasonality	Low
0.0309678944576675	0.0321778406226092	5	0.04	18	Seasonality	Low
-0.020596555962344	-0.0234815608094032	5	0.04	18	Seasonality	Low
-0.0208898331277699	-0.0184924835987529	5	0.04	18	Seasonality	Low
0.0336877301893436	0.0319925361174742	5	0.04	18	Seasonality	Low
-0.0348157632584004	-0.0383793393210669	5	0.04	18	Seasonality	Low
-0.00755234621286669	-0.00884475555195786	5	0.04	18	Seasonality	Low
0.0217538207361696	0.0214250008432587	5	0.04	18	Seasonality	Low
-0.0256994133745942	-0.0410626325264215	5	0.04	18	Seasonality	Low
-0.0312845154766024	-0.0355108728994424	5	0.04	18	Seasonality	Low
-0.0277430599139065	-0.0295950310650479	5	0.04	18	Seasonality	Low
0.0363209802896001	0.0347300959406335	5	0.04	18	Seasonality	Low
-0.0295403339855774	-0.0371172850284755	5	0.04	18	Seasonality	Low
0.0311477263008332	0.0235522621141832	5	0.04	18	Seasonality	Low
0.0150203580593216	0.0148405246666355	10	0.04	18	Seasonality	Low
0.0143335671809619	0.0206990364170898	10	0.04	18	Seasonality	Low
0.0136652863309242	0.0126480993039749	10	0.04	18	Seasonality	Low
0.025041023376258	0.0211262748722907	10	0.04	18	Seasonality	Low
-0.00438729432933954	-0.00833510199478325	10	0.04	18	Seasonality	Low
-0.0262035642280453	-0.0288792776140128	10	0.04	18	Seasonality	Low
-0.0202425473015383	-0.0311251131744183	10	0.04	18	Seasonality	Low
-0.0157022905336741	-0.014309968671833	10	0.04	18	Seasonality	Low
-0.0401734470312135	-0.047581956935068	10	0.04	18	Seasonality	Low
0.00483031016756724	0.00546102257893151	10	0.04	18	Seasonality	Low
0.0175682377323647	0.0216324822593326	10	0.04	18	Seasonality	Low
0.0119161789220828	0.00400777248391403	10	0.04	18	Seasonality	Low
0.0254984072086949	0.0294625762540577	10	0.04	18	Seasonality	Low
0.00263403670028331	0.00485532168831629	10	0.04	18	Seasonality	Low
-0.021270674030527	-0.0206430441395258	10	0.04	18	Seasonality	Low
0.0154540416322062	0.018037732341915	10	0.04	18	Seasonality	Low
-0.0169105996210715	-0.0216134510341576	10	0.04	18	Seasonality	Low
-0.0185197596277072	-0.0222849244899913	10	0.04	18	Seasonality	Low
-0.0503610494897306	-0.0615743906536353	10	0.04	18	Seasonality	Low
0.00757627072308048	0.00457412489559551	10	0.04	18	Seasonality	Low
-0.0390289196529567	-0.0397547005916047	10	0.04	18	Seasonality	Low
-0.0157756542161714	-0.0150920948533828	10	0.04	18	Seasonality	Low
0.0353431423180778	0.0327440161033631	10	0.04	18	Seasonality	Low
-0.0336809428652569	-0.0395141415435526	10	0.04	18	Seasonality	Low
-0.0369291735281047	-0.038394580130427	10	0.04	18	Seasonality	Low
-0.00431797722581073	-0.00765568078140687	10	0.04	18	Seasonality	Low
0.0177928950105282	0.0129819605417681	10	0.04	18	Seasonality	Low
0.0272965248594636	0.0309309577735225	10	0.04	18	Seasonality	Low
-0.03134822409739	-0.0312739143315277	10	0.04	18	Seasonality	Low
-0.0476728521787773	-0.0445861137724104	10	0.04	18	Seasonality	Low
0.0324849317524364	0.0296555192468178	10	0.04	18	Seasonality	Low
0.0236008757887261	0.0198787633128605	10	0.04	18	Seasonality	Low
0.0162653742905855	0.016581033423808	10	0.04	18	Seasonality	Low
-0.0462575242685421	-0.0503482021688526	10	0.04	18	Seasonality	Low
0.0232880377497907	0.0257511193007992	10	0.04	18	Seasonality	Low
0.0228075389780778	0.0310035334569582	10	0.04	18	Seasonality	Low
0.0268959663570887	0.0314442751572266	10	0.04	18	Seasonality	Low
0.0228752510928506	0.0264505845627115	10	0.04	18	Seasonality	Low
0.0255950378567722	0.0227223537835853	10	0.04	18	Seasonality	Low
0.0108737115554938	0.0119552681206513	10	0.04	18	Seasonality	Low
-0.0423180319629361	-0.0408913521175295	10	0.04	18	Seasonality	Low
0.00135015404699772	0.0120823259123968	10	0.04	18	Seasonality	Low
-0.0439988427550794	-0.0429867541581312	10	0.04	18	Seasonality	Low
0.00420794386948335	-0.0028509048068137	10	0.04	18	Seasonality	Low
0.02157988191525	0.0198442031309706	10	0.04	18	Seasonality	Low
0.0279967707928014	0.0284090533749907	10	0.04	18	Seasonality	Low
-0.0456924747820154	-0.0417287252994957	10	0.04	18	Seasonality	Low
0.0272386212309176	0.0328933642159856	10	0.04	18	Seasonality	Low
0.00984305287842271	0.0124640465963604	10	0.04	18	Seasonality	Low
-0.0409163020673417	-0.0362368901279247	10	0.04	18	Seasonality	Low
0.0329860297155628	0.0308200987083588	10	0.04	18	Seasonality	Low
-0.0484480580865442	-0.0501846151082832	10	0.04	18	Seasonality	Low
-0.0418046944202134	-0.0427566636317486	10	0.04	18	Seasonality	Low
-0.0574319133358305	-0.0495339038923426	10	0.04	18	Seasonality	Low
-0.00984933564088133	-0.016572598339776	10	0.04	18	Seasonality	Low
-0.0291106769703799	-0.0315091435188576	10	0.04	18	Seasonality	Low
-0.0414342176913295	-0.0469039886840566	10	0.04	18	Seasonality	Low
-0.0433567557021092	-0.043094206842015	10	0.04	18	Seasonality	Low
-0.0436006995491673	-0.0438229678896878	10	0.04	18	Seasonality	Low
-0.0259498208353164	-0.0329206842439874	10	0.04	18	Seasonality	Low
-0.0253272359579913	-0.0277504926701724	10	0.04	18	Seasonality	Low
-0.0414332532547934	-0.0376527436947609	10	0.04	18	Seasonality	Low
0.00452108988907068	0.00403806498477534	10	0.04	18	Seasonality	Low
-0.0415416236936448	-0.047718628733521	10	0.04	18	Seasonality	Low
-0.0417007216312461	-0.0452175679768408	10	0.04	18	Seasonality	Low
0.0223090017690258	0.0128241561289548	10	0.04	18	Seasonality	Low
0.0275235221007807	0.0281473005159743	10	0.04	18	Seasonality	Low
-0.0135317245950603	-0.00880529842352133	10	0.04	18	Seasonality	Low
-0.0110129474086677	-0.0107775642475956	10	0.04	18	Seasonality	Low
-0.0176876345793246	-0.016574782609611	10	0.04	18	Seasonality	Low
-0.057791236980642	-0.0458054628643791	10	0.04	18	Seasonality	Low
-8.22603341602609e-05	0.00274696274224841	10	0.04	18	Seasonality	Low
0.0231354364523845	0.0242465905238289	10	0.04	18	Seasonality	Low
0.0184524784065969	0.0193815209970468	10	0.04	18	Seasonality	Low
-0.0322149863323309	-0.0255029914805752	10	0.04	18	Seasonality	Low
0.0116737347253438	0.0131603684475308	10	0.04	18	Seasonality	Low
-0.00780779608042725	-0.00320424872922921	10	0.04	18	Seasonality	Low
-0.0146464668691837	-0.0101527138276932	10	0.04	18	Seasonality	Low
-0.0123665403105006	-0.0240742507318868	10	0.04	18	Seasonality	Low
-0.0224477978138263	-0.0240644537917795	10	0.04	18	Seasonality	Low
-0.00380748360826986	-0.00599028970194297	10	0.04	18	Seasonality	Low
0.00714232661362355	0.00950944145032402	10	0.04	18	Seasonality	Low
-0.0501657497105582	-0.0469888502584752	10	0.04	18	Seasonality	Low
-0.017227984094393	-0.0262915841752793	10	0.04	18	Seasonality	Low
-0.0254292668603959	-0.0312773320836062	10	0.04	18	Seasonality	Low
-0.0219121227490292	-0.0256752186595769	500	0.04	18	Seasonality	Low
0.0151343778442452	0.0161625759140532	500	0.04	18	Seasonality	Low
0.00215556584026351	0.00347845491455193	500	0.04	18	Seasonality	Low
-0.0653699752169191	-0.0649465930844528	500	0.04	18	Seasonality	Low
-0.0413679286871035	-0.040449574027081	500	0.04	18	Seasonality	Low
-0.0667826138508739	-0.0660544878636271	500	0.04	18	Seasonality	Low
-0.0608759831602737	-0.0599814398671035	500	0.04	18	Seasonality	Low
-0.0228888291155625	-0.0232130699640068	500	0.04	18	Seasonality	Low
-0.0636881380233317	-0.0652190671352779	500	0.04	18	Seasonality	Low
-0.0432670323943489	-0.0466383740047054	500	0.04	18	Seasonality	Low
0.0259582543230432	0.0161286391170226	500	0.04	18	Seasonality	Low
-0.00452977705858675	-0.00468827429542325	500	0.04	18	Seasonality	Low
-0.0399583295539217	-0.0381058690042144	500	0.04	18	Seasonality	Low
-0.014574942945889	-0.0164294423016926	500	0.04	18	Seasonality	Low
-0.0402333718392396	-0.0390378650459576	500	0.04	18	Seasonality	Low
-0.0509143029273324	-0.0515649719287495	500	0.04	18	Seasonality	Low
0.00120794771100577	0.00246746180722651	500	0.04	18	Seasonality	Low
-0.0712750117725726	-0.0703962949754018	500	0.04	18	Seasonality	Low
-0.07143660792016	-0.0653816056177889	500	0.04	18	Seasonality	Low
-0.0455995180506027	-0.0421493885063625	500	0.04	18	Seasonality	Low
-0.020220491630218	-0.0194755926408979	500	0.04	18	Seasonality	Low
-0.075142568983218	-0.0702407364546888	500	0.04	18	Seasonality	Low
-0.0688696588805559	-0.0521038478162167	500	0.04	18	Seasonality	Low
-0.00601800813757976	-0.00277225358870715	500	0.04	18	Seasonality	Low
0.0186368131540206	0.0163723834390992	500	0.04	18	Seasonality	Low
-0.0657710565125489	-0.0601788930132181	500	0.04	18	Seasonality	Low
-0.0439950046673669	-0.0462651910331166	500	0.04	18	Seasonality	Low
-0.0244220157765724	-0.0212102760164416	500	0.04	18	Seasonality	Low
-0.0195416486705507	-0.0216565411408628	500	0.04	18	Seasonality	Low
-0.00952264475630544	-0.00876505738937543	500	0.04	18	Seasonality	Low
0.0307172251530675	0.0328951662063936	5	0.04	7	Seasonality	High
0.0233278880341226	0.0270481891628915	5	0.04	7	Seasonality	High
-0.00603762835991473	-0.00422803100188263	5	0.04	7	Seasonality	High
0.0153250117203931	0.0150574987165346	5	0.04	7	Seasonality	High
0.00162497757445977	-0.00534143909143936	5	0.04	7	Seasonality	High
-0.0502170625392815	-0.0534997043906091	5	0.04	7	Seasonality	High
-0.00661738139796202	-0.0070173803702746	5	0.04	7	Seasonality	High
0.0153332959217887	0.01962278851536	5	0.04	7	Seasonality	High
-0.0264946422735906	-0.0230568891556947	5	0.04	7	Seasonality	High
0.000537806277407142	0.0042328672104642	5	0.04	7	Seasonality	High
-0.0255270500386223	-0.0216382923103317	5	0.04	7	Seasonality	High
0.0280791038451371	0.0205304424277032	5	0.04	7	Seasonality	High
-0.0116615407850172	-0.015539010986099	5	0.04	7	Seasonality	High
-0.0112706761559968	-0.0107783351733142	5	0.04	7	Seasonality	High
-0.030961347435322	-0.0233588272750245	5	0.04	7	Seasonality	High
-0.0198439603846756	-0.0185405171939287	5	0.04	7	Seasonality	High
-0.014439567329664	-0.0117516309881827	5	0.04	7	Seasonality	High
-0.0159362297754202	-0.0151365462076003	5	0.04	7	Seasonality	High
-0.00601710375220197	-0.00705508289563107	5	0.04	7	Seasonality	High
0.0053770079577945	0.00253240019384534	5	0.04	7	Seasonality	High
0.0132355607062924	0.026489517485425	5	0.04	7	Seasonality	High
0.0330258315443618	0.0339292464624736	5	0.04	7	Seasonality	High
0.0260482888302425	0.0312475978979514	5	0.04	7	Seasonality	High
0.0319876521666041	0.0380456252271985	5	0.04	7	Seasonality	High
0.00552749010974096	0.0121392299316068	5	0.04	7	Seasonality	High
0.0197578126524563	0.0149083583442722	5	0.04	7	Seasonality	High
0.0249264601356586	0.0327661258358346	5	0.04	7	Seasonality	High
0.0191793005862578	0.0194302450689329	5	0.04	7	Seasonality	High
-0.0245436643539989	-0.0294585316056201	5	0.04	7	Seasonality	High
-0.0656849959005354	-0.0622670330601785	5	0.04	7	Seasonality	High
-0.0406821224319004	-0.0406704199405508	5	0.04	7	Seasonality	High
-0.0248331760591095	-0.0300583933728488	5	0.04	7	Seasonality	High
0.00181186012899711	-0.0025775032868772	5	0.04	7	Seasonality	High
0.0164926562315864	0.00611732731471099	5	0.04	7	Seasonality	High
-0.028598259455491	-0.0371695540312263	5	0.04	7	Seasonality	High
-0.0633801510094009	-0.0608762578389575	5	0.04	7	Seasonality	High
-0.00692373045736245	-0.00822389219320545	5	0.04	7	Seasonality	High
-0.0551898456980919	-0.0529468031678719	5	0.04	7	Seasonality	High
-0.00528550850114171	-0.000168905037121768	5	0.04	7	Seasonality	High
-0.0609219679406017	-0.0626958199047146	5	0.04	7	Seasonality	High
-0.0444673850478211	-0.0472812202687369	5	0.04	7	Seasonality	High
-0.00719787799856973	-0.00622094643188115	5	0.04	7	Seasonality	High
-0.0686236288603231	-0.0635386546552258	5	0.04	7	Seasonality	High
-0.0275392583114012	-0.0283891091917643	5	0.04	7	Seasonality	High
-0.00464726255550142	-0.0125005925561426	5	0.04	7	Seasonality	High
-0.0330005246765349	-0.0323515225053965	5	0.04	7	Seasonality	High
-0.0398489770651658	-0.0430420656317536	5	0.04	7	Seasonality	High
-0.00110970002504477	-0.00547285502909872	5	0.04	7	Seasonality	High
-0.0232040205345399	-0.0252181869991344	5	0.04	7	Seasonality	High
-0.00746520076598205	-0.0136492834796305	5	0.04	7	Seasonality	High
-0.0653065154861426	-0.0645187580295061	5	0.04	7	Seasonality	High
-0.0430921655929122	-0.0469799523647202	5	0.04	7	Seasonality	High
-0.00752249742780293	-0.0110154325077814	5	0.04	7	Seasonality	High
-0.00381202089850423	-0.00150548859549213	5	0.04	7	Seasonality	High
-0.0503957553937616	-0.0531423986087453	5	0.04	7	Seasonality	High
-0.00977858299141567	-0.00492221106485235	5	0.04	7	Seasonality	High
-0.0549601998761336	-0.055776454950845	5	0.04	7	Seasonality	High
-0.00704240725106219	-0.00884300100486787	5	0.04	7	Seasonality	High
-0.0543385924510667	-0.0532212686342543	5	0.04	7	Seasonality	High
-0.00747309946187592	-0.0174158252193056	5	0.04	7	Seasonality	High
-0.00862512400209089	-0.00718342692659571	5	0.04	7	Seasonality	High
-0.0110098584149664	-0.00469036374640087	5	0.04	7	Seasonality	High
-0.0218157305759452	-0.020703749459539	5	0.04	7	Seasonality	High
-0.0439123406263997	-0.0498548686291174	5	0.04	7	Seasonality	High
-0.0285210725524034	-0.0284525992215729	5	0.04	7	Seasonality	High
-0.0576543411804569	-0.0536269871129232	5	0.04	7	Seasonality	High
-0.00525743644000816	-0.00412527229836539	5	0.04	7	Seasonality	High
-0.0103923012119347	-0.00863601569160652	5	0.04	7	Seasonality	High
-0.0585780285682087	-0.0612529077221541	5	0.04	7	Seasonality	High
-0.00398262209084357	-0.00452445906296756	5	0.04	7	Seasonality	High
-0.0453715370774297	-0.0502709295971164	5	0.04	7	Seasonality	High
-0.0149153302233945	-0.0160567886071158	5	0.04	7	Seasonality	High
-0.0314043348561363	-0.0298072367836541	5	0.04	7	Seasonality	High
-0.0204646573019933	-0.0288120853249527	5	0.04	7	Seasonality	High
-0.0485153346844889	-0.0489777576631409	5	0.04	7	Seasonality	High
-0.0310577405590454	-0.031959482280462	5	0.04	7	Seasonality	High
0.0351319241914345	0.0219401012948736	5	0.04	7	Seasonality	High
-0.0410801847883691	-0.0340679155680659	5	0.04	7	Seasonality	High
-0.0599140910111914	-0.059030747383891	5	0.04	7	Seasonality	High
-0.0346630482799508	-0.0400664779680853	5	0.04	7	Seasonality	High
-0.0206329839973321	-0.0256920756093627	5	0.04	7	Seasonality	High
-0.0168336508448742	-0.0187124870012295	5	0.04	7	Seasonality	High
-0.0402949812138683	-0.0468298222266365	5	0.04	7	Seasonality	High
-0.0596151737086347	-0.0580165836409702	5	0.04	7	Seasonality	High
-0.0293756757630198	-0.0304286446383472	5	0.04	7	Seasonality	High
-0.0174127580947621	-0.0241945465845182	10	0.04	7	Seasonality	High
-0.0404007572282814	-0.0445591562314786	10	0.04	7	Seasonality	High
-0.00302152455739205	-0.000769913731486643	10	0.04	7	Seasonality	High
0.0100482374867914	0.00623095159237388	10	0.04	7	Seasonality	High
-0.0343856332047283	-0.0350416482773253	10	0.04	7	Seasonality	High
-0.0126181023394315	-0.020369920385701	10	0.04	7	Seasonality	High
-0.0418029726999517	-0.0374903265180474	10	0.04	7	Seasonality	High
-0.0184818638149825	-0.008879960818999	10	0.04	7	Seasonality	High
0.021588934229479	0.0137694095714228	10	0.04	7	Seasonality	High
-0.00735574266282422	-0.000154176115273984	10	0.04	7	Seasonality	High
0.00708915430525081	0.00457019875761963	10	0.04	7	Seasonality	High
-0.0360534973329197	-0.0519625374887499	10	0.04	7	Seasonality	High
-0.0060355172945985	-0.00492959434644569	10	0.04	7	Seasonality	High
-0.0344900440554289	-0.0290122835902637	10	0.04	7	Seasonality	High
0.0332707131909832	0.0266846068850265	10	0.04	7	Seasonality	High
-0.054651087359832	-0.0528661434973153	10	0.04	7	Seasonality	High
-0.00419046173653894	-0.0141122466188054	10	0.04	7	Seasonality	High
0.0239584682410121	0.0305563715519875	10	0.04	7	Seasonality	High
-0.00974630065916892	-0.0186357533041832	10	0.04	7	Seasonality	High
-0.0216628102714792	-0.0196296838234141	10	0.04	7	Seasonality	High
0.0224037517752702	0.0127351282342268	10	0.04	7	Seasonality	High
0.0097801923446548	0.0141813126562694	10	0.04	7	Seasonality	High
-0.0423950545329321	-0.044541267608118	10	0.04	7	Seasonality	High
0.0287085341835423	0.030474613386562	10	0.04	7	Seasonality	High
-0.0356408218601394	-0.041336526784975	10	0.04	7	Seasonality	High
-0.0245174139212293	-0.0256808881443919	10	0.04	7	Seasonality	High
-0.0109570587650413	-0.011601748787465	10	0.04	7	Seasonality	High
0.0160455790242784	0.0130480085074346	10	0.04	7	Seasonality	High
-0.0440237702233713	-0.0354670545094901	10	0.04	7	Seasonality	High
-2.58421286988081e-05	-0.00024472867524826	10	0.04	7	Seasonality	High
-0.0679410144011559	-0.0754534775125225	10	0.04	7	Seasonality	High
-0.0401541980556177	-0.0421159527226766	10	0.04	7	Seasonality	High
-0.0711508437229771	-0.0753994827651119	10	0.04	7	Seasonality	High
-0.0763002280884296	-0.0769993673977392	10	0.04	7	Seasonality	High
-0.0523167708985217	-0.056042598787958	10	0.04	7	Seasonality	High
-0.00916564698728053	-0.013857120709703	10	0.04	7	Seasonality	High
-0.0283462120742882	-0.0307503430672343	10	0.04	7	Seasonality	High
-0.0646383867454572	-0.0742125729891546	10	0.04	7	Seasonality	High
-0.0463161715714637	-0.047675262318824	10	0.04	7	Seasonality	High
-0.0612992667234147	-0.0566119607050407	10	0.04	7	Seasonality	High
-0.0825935607061237	-0.0839337344382262	10	0.04	7	Seasonality	High
-0.0519367673836789	-0.0466544297010217	10	0.04	7	Seasonality	High
-0.0725918254614037	-0.0622080944718075	10	0.04	7	Seasonality	High
-0.0552815238284951	-0.0498738851446774	10	0.04	7	Seasonality	High
-0.0176982784614091	-0.0215681332963296	10	0.04	7	Seasonality	High
-0.0695456745674849	-0.0620419759477164	10	0.04	7	Seasonality	High
-0.0239779638076624	-0.0274763500906198	10	0.04	7	Seasonality	High
-0.0106266307478982	-0.00646642797847851	10	0.04	7	Seasonality	High
-0.0108417475608845	-0.0116103673834951	10	0.04	7	Seasonality	High
-0.00889389079784561	-0.00739077121252335	10	0.04	7	Seasonality	High
-0.0676747584294554	-0.067478724562205	10	0.04	7	Seasonality	High
-0.0338903041167862	-0.0409500780223091	10	0.04	7	Seasonality	High
-0.0482949238909994	-0.050357821632892	10	0.04	7	Seasonality	High
-0.0755847459757329	-0.0710719965412598	10	0.04	7	Seasonality	High
0.0056941176882438	0.00126530617474841	10	0.04	7	Seasonality	High
-0.0757500331411073	-0.0713817456239452	10	0.04	7	Seasonality	High
-0.0114871604406124	-0.0116572730995941	10	0.04	7	Seasonality	High
-0.0703917782332955	-0.0681212356825682	10	0.04	7	Seasonality	High
-0.0124872129124287	-0.011258788871261	10	0.04	7	Seasonality	High
-0.0767559802976159	-0.0741463139650801	10	0.04	7	Seasonality	High
-0.0446465364122495	-0.0391437189609	10	0.04	7	Seasonality	High
-0.0495278697645152	-0.05042644604418	10	0.04	7	Seasonality	High
-0.0455542789920965	-0.0449731671090322	10	0.04	7	Seasonality	High
0.0258094457457038	0.0115172909136036	10	0.04	7	Seasonality	High
-0.0378582603866137	-0.0374339719265175	10	0.04	7	Seasonality	High
-0.0501712221587242	-0.0523060671652397	500	0.04	7	Seasonality	High
-0.00406797311854151	-0.00594882217477852	500	0.04	7	Seasonality	High
-0.0309970454514815	-0.0321991873766304	500	0.04	7	Seasonality	High
-0.00308457342552623	0.00161466752884261	500	0.04	7	Seasonality	High
-0.0435990946582441	-0.0451113971259258	500	0.04	7	Seasonality	High
-0.0336602489294389	-0.0299917740953748	500	0.04	7	Seasonality	High
-0.000534786415583834	-0.00529929090623188	500	0.04	7	Seasonality	High
-0.0412245466590666	-0.0395177746521837	500	0.04	7	Seasonality	High
-0.0255075254235227	-0.016435615444674	500	0.04	7	Seasonality	High
-0.0697371116363027	-0.0720861539452263	500	0.04	7	Seasonality	High
-0.0262094894189284	-0.0322471550690479	500	0.04	7	Seasonality	High
-0.0373481269541538	-0.0403548432282443	500	0.04	7	Seasonality	High
-0.0554252135892747	-0.0541065820379475	500	0.04	7	Seasonality	High
-0.0562744779829754	-0.0551011748828825	500	0.04	7	Seasonality	High
-0.0605519454068609	-0.059339283226019	500	0.04	7	Seasonality	High
-0.0342790143086403	-0.041062193948472	500	0.04	7	Seasonality	High
-0.00207577792795795	-0.00510835035783047	500	0.04	7	Seasonality	High
-0.0240218476715229	-0.0246763976385126	500	0.04	7	Seasonality	High
-0.0300415338306319	-0.0222572883347747	500	0.04	7	Seasonality	High
0.021779278213237	0.0180844298002085	500	0.04	7	Seasonality	High
-0.0307054174852679	-0.0266688133288889	500	0.04	7	Seasonality	High
0.0136412615205508	0.0204635313999977	500	0.04	7	Seasonality	High
-0.0674525749495822	-0.0679209186894721	500	0.04	7	Seasonality	High
0.0174803900511192	0.0167779562942982	500	0.04	7	Seasonality	High
-0.0427196990399717	-0.0466977194449613	500	0.04	7	Seasonality	High
-0.0445309465090302	-0.0465676260410653	500	0.04	7	Seasonality	High
-0.00763408695049621	-0.00721395339814558	500	0.04	7	Seasonality	High
-0.00803578533493527	-0.00134891640769678	500	0.04	7	Seasonality	High
-0.0225075865167162	-0.0213753784354729	500	0.04	7	Seasonality	High
-0.0272164206886026	-0.0294166080118384	500	0.04	7	Seasonality	High
0.0244049495285335	0.0265327836741431	5	0.04	18	Seasonality	High
-0.00538635759806806	-0.00346808363868334	5	0.04	18	Seasonality	High
0.0215345940153327	0.0271765988310176	5	0.04	18	Seasonality	High
-0.0272610162466539	-0.0189449330320022	5	0.04	18	Seasonality	High
0.00200070885314849	-0.00591987154581484	5	0.04	18	Seasonality	High
0.0229170687683262	0.0368544602206266	5	0.04	18	Seasonality	High
-0.0110141998389993	-0.0105393314669354	5	0.04	18	Seasonality	High
-0.0215155900439742	-0.0242760172328851	5	0.04	18	Seasonality	High
-0.0185783622161758	-0.0187967182663806	5	0.04	18	Seasonality	High
0.0322373324685422	0.0336893214838725	5	0.04	18	Seasonality	High
-0.0159885029950102	-0.018944698287545	5	0.04	18	Seasonality	High
-0.014225160643822	-0.0202357995634187	5	0.04	18	Seasonality	High
0.0305560585933724	0.0234708804250446	5	0.04	18	Seasonality	High
0.0333262211682482	0.0419768103788328	5	0.04	18	Seasonality	High
0.0216128785447206	0.0258469933526514	5	0.04	18	Seasonality	High
0.0165633336569584	0.0222751506282353	5	0.04	18	Seasonality	High
-0.0594656287481698	-0.0624150111698431	5	0.04	18	Seasonality	High
-0.0209970810440888	-0.0194332953499873	5	0.04	18	Seasonality	High
-0.0277268651648014	-0.0223033030746572	5	0.04	18	Seasonality	High
0.03119958268301	0.0357168833476945	5	0.04	18	Seasonality	High
-0.0104258045056825	-0.00903090183354473	5	0.04	18	Seasonality	High
-0.0212933944478179	-0.0204227692760756	5	0.04	18	Seasonality	High
0.0299873532594956	0.0257534054453153	5	0.04	18	Seasonality	High
0.0267803772738223	0.0288328446324416	5	0.04	18	Seasonality	High
0.0155861604734669	0.0189608248008365	5	0.04	18	Seasonality	High
0.0360290344814187	0.0324308940842562	5	0.04	18	Seasonality	High
-0.0247399679833002	-0.0253048021135621	5	0.04	18	Seasonality	High
-0.00744690102454599	-0.025618269499724	5	0.04	18	Seasonality	High
-0.00596035961250308	-0.00855110939656132	5	0.04	18	Seasonality	High
0.0284644555248446	0.0276246107045786	5	0.04	18	Seasonality	High
-0.00498549170069389	-0.0131612065257473	5	0.04	18	Seasonality	High
0.0338041758520481	0.0334047725340543	5	0.04	18	Seasonality	High
0.0046304340787123	0.00297022270649117	5	0.04	18	Seasonality	High
-0.0501997029152324	-0.0481218394830984	5	0.04	18	Seasonality	High
-0.00958643371598584	-0.00312918442400668	5	0.04	18	Seasonality	High
-0.0432105486792952	-0.0432888247238691	5	0.04	18	Seasonality	High
0.0108006390031452	0.00726145236402738	5	0.04	18	Seasonality	High
-0.0309929549038565	-0.029590861790097	5	0.04	18	Seasonality	High
-4.44821176527653e-05	-0.0046554410861002	5	0.04	18	Seasonality	High
-0.0583501832768775	-0.0544938139536528	5	0.04	18	Seasonality	High
-0.0537589999303465	-0.0559419562723104	5	0.04	18	Seasonality	High
-0.0557331523232256	-0.0521006529511608	5	0.04	18	Seasonality	High
-0.014077916933529	-0.0125203150150826	5	0.04	18	Seasonality	High
-0.0204968007706734	-0.0206348270928961	5	0.04	18	Seasonality	High
-0.00529264924545946	-0.00619009022411876	5	0.04	18	Seasonality	High
0.0341403948268586	0.0256542767390004	5	0.04	18	Seasonality	High
-0.00480751659214706	-0.00832565665362019	5	0.04	18	Seasonality	High
-0.0246270619878915	-0.0217123853179721	5	0.04	18	Seasonality	High
0.00451667495231592	4.02969425055012e-05	5	0.04	18	Seasonality	High
-0.0205894251249624	-0.0119447899815981	5	0.04	18	Seasonality	High
0.00024004469857143	-0.00460334151121362	5	0.04	18	Seasonality	High
-0.0620673121192857	-0.0649045550411249	5	0.04	18	Seasonality	High
-0.00698493598235313	0.00072873628531111	5	0.04	18	Seasonality	High
0.0362267502480276	0.0335649391033467	5	0.04	18	Seasonality	High
0.0195404695320372	0.017540017152277	5	0.04	18	Seasonality	High
-0.0205169935133809	-0.0335651935668183	5	0.04	18	Seasonality	High
-0.0183887149826162	-0.0165606910473767	5	0.04	18	Seasonality	High
-0.0413299150815523	-0.0414997922757671	5	0.04	18	Seasonality	High
-0.0675843156334029	-0.0612712877825571	5	0.04	18	Seasonality	High
-0.0263903388183039	-0.0198972211330648	5	0.04	18	Seasonality	High
-0.0111696772652958	-0.010879095596922	5	0.04	18	Seasonality	High
-0.0112635864778885	-0.0100445272376588	5	0.04	18	Seasonality	High
-0.00208888597467638	-0.014163155602522	5	0.04	18	Seasonality	High
-0.0297442137520315	-0.0310460753012418	5	0.04	18	Seasonality	High
0.0216740038024195	0.026203307481109	5	0.04	18	Seasonality	High
-0.00512807627433441	-0.00239592539744913	5	0.04	18	Seasonality	High
-0.00722333450716477	-0.00659176032188444	5	0.04	18	Seasonality	High
-0.0590992601238973	-0.0552292086417009	5	0.04	18	Seasonality	High
-0.00116331987184606	-0.00900515426239208	5	0.04	18	Seasonality	High
-0.01212033102164	-0.00601598482632336	5	0.04	18	Seasonality	High
-0.0112881438833576	-0.00813465837342457	5	0.04	18	Seasonality	High
-0.0541359567826587	-0.0631798600630833	5	0.04	18	Seasonality	High
-0.0217905233256595	-0.0302701570892094	5	0.04	18	Seasonality	High
-0.0138768072953455	-0.019705737541258	5	0.04	18	Seasonality	High
0.0275786519257397	0.0213361943446001	5	0.04	18	Seasonality	High
-0.0574584165172568	-0.0495736269301399	5	0.04	18	Seasonality	High
-0.00485725427699441	-0.00465891026966622	5	0.04	18	Seasonality	High
0.00304369670768501	0.00478258239742614	5	0.04	18	Seasonality	High
0.0225799336330302	0.022171337989339	5	0.04	18	Seasonality	High
-0.0150017008599938	-0.00768134756101882	5	0.04	18	Seasonality	High
0.00172843118058194	0.00163446387084975	5	0.04	18	Seasonality	High
0.0270171721618006	0.0233246129689094	5	0.04	18	Seasonality	High
-0.00688305339311654	-0.00438574302427962	5	0.04	18	Seasonality	High
0.0180155874752958	0.0165026630449428	5	0.04	18	Seasonality	High
-0.0418400698177887	-0.0416999983200642	5	0.04	18	Seasonality	High
-0.0164721367503133	-0.0121039929258384	10	0.04	18	Seasonality	High
0.01335071801587	0.0200405230302746	10	0.04	18	Seasonality	High
0.0079395180150861	0.00502660925716853	10	0.04	18	Seasonality	High
-0.0532908918295844	-0.0459602218697564	10	0.04	18	Seasonality	High
-0.0381615867185652	-0.0411192690318889	10	0.04	18	Seasonality	High
0.00832191678650008	0.0104643810141171	10	0.04	18	Seasonality	High
-0.0424149637242359	-0.0417034657668352	10	0.04	18	Seasonality	High
-0.037146970708611	-0.0361989458668359	10	0.04	18	Seasonality	High
-0.015233386359015	-0.0255706051791088	10	0.04	18	Seasonality	High
-0.0353385867850902	-0.0307586304838064	10	0.04	18	Seasonality	High
0.0132299450229149	0.0130055665546262	10	0.04	18	Seasonality	High
-0.0163322040946043	-0.0174905785637608	10	0.04	18	Seasonality	High
0.00336610990493821	0.00318796517309299	10	0.04	18	Seasonality	High
0.0117192989908195	0.0116655329663175	10	0.04	18	Seasonality	High
-0.0463432159625186	-0.0464200772029813	10	0.04	18	Seasonality	High
0.00326794858061147	-0.000538709763182439	10	0.04	18	Seasonality	High
0.0191380655657704	0.0101421028693025	10	0.04	18	Seasonality	High
0.0243342477558472	0.0280400352877621	10	0.04	18	Seasonality	High
0.00779174766610777	0.0130484292477132	10	0.04	18	Seasonality	High
-0.0411057695567701	-0.0411879054646528	10	0.04	18	Seasonality	High
-0.0439556899183168	-0.046010818178131	10	0.04	18	Seasonality	High
0.00204984299857325	-5.3717477504836e-06	10	0.04	18	Seasonality	High
-0.0405083232452674	-0.0387483986508361	10	0.04	18	Seasonality	High
-0.0215447025719545	-0.0229480643671025	10	0.04	18	Seasonality	High
0.0221525886876662	0.022044600764787	10	0.04	18	Seasonality	High
-0.000917645377319305	0.00961329191224201	10	0.04	18	Seasonality	High
-0.0574986501786073	-0.047886733932414	10	0.04	18	Seasonality	High
-0.0574010031359294	-0.0666554562509742	10	0.04	18	Seasonality	High
-0.0645195290768771	-0.0653525910689061	10	0.04	18	Seasonality	High
-0.0150618785828962	-0.0189340154095961	10	0.04	18	Seasonality	High
-0.0727586788450907	-0.0776358382196534	10	0.04	18	Seasonality	High
-0.0456337519643279	-0.0645313271595554	10	0.04	18	Seasonality	High
-0.0425658265051426	-0.0394301206545221	10	0.04	18	Seasonality	High
-0.0606871760446001	-0.0507725343377528	10	0.04	18	Seasonality	High
-0.00321664933291135	-0.00693865263322498	10	0.04	18	Seasonality	High
-0.0696294031112763	-0.0681664846949073	10	0.04	18	Seasonality	High
-0.0726813669174713	-0.068431737618482	10	0.04	18	Seasonality	High
-0.0532720578578133	-0.0545660617199206	10	0.04	18	Seasonality	High
-0.077916863574586	-0.0788747603837842	10	0.04	18	Seasonality	High
0.0265835907031474	0.0165873600472745	10	0.04	18	Seasonality	High
-0.0476907537866419	-0.0454448589630758	10	0.04	18	Seasonality	High
-0.0669092470693762	-0.0477499537207466	10	0.04	18	Seasonality	High
-0.0411240596263735	-0.0481630062115917	10	0.04	18	Seasonality	High
-0.0288993735500698	-0.0284442638221154	10	0.04	18	Seasonality	High
0.0229952917759632	0.017059238958971	10	0.04	18	Seasonality	High
-0.0511509464831705	-0.0563060651784038	10	0.04	18	Seasonality	High
-0.0363388916678622	-0.0378509246613307	10	0.04	18	Seasonality	High
-0.0101493540517048	-0.00560498338207068	10	0.04	18	Seasonality	High
-0.00145901177401895	-0.0104400664820406	10	0.04	18	Seasonality	High
0.0199544360294821	0.0144055454378876	10	0.04	18	Seasonality	High
-0.0150989625187248	-0.0158976491369605	500	0.04	18	Seasonality	High
-0.0690413457582641	-0.0626457787769658	500	0.04	18	Seasonality	High
-0.0491320525063478	-0.0502786777690311	500	0.04	18	Seasonality	High
0.0213211370249448	0.0159597745666378	500	0.04	18	Seasonality	High
-0.0796253502567464	-0.0755506324364774	500	0.04	18	Seasonality	High
-0.0248447263987874	-0.0286978902001476	500	0.04	18	Seasonality	High
-0.0390637050899996	-0.0288057744726617	500	0.04	18	Seasonality	High
-0.0137752239602034	-0.0177702054435921	500	0.04	18	Seasonality	High
-0.0178517604720801	-0.0145356603429048	500	0.04	18	Seasonality	High
-0.0661104853625748	-0.0666754720164393	500	0.04	18	Seasonality	High
0.0223253756970505	0.0165264212218666	500	0.04	18	Seasonality	High
-0.0139753308287512	-0.0107584573938795	500	0.04	18	Seasonality	High
-0.0597254928227928	-0.0588222175297613	500	0.04	18	Seasonality	High
-0.0505670353727002	-0.0543490822460044	500	0.04	18	Seasonality	High
-0.0101906233901463	-0.00999821394890323	500	0.04	18	Seasonality	High
-0.0435927505512228	-0.0465792521729106	500	0.04	18	Seasonality	High
0.00853236129209388	0.00917580693656044	500	0.04	18	Seasonality	High
-0.0431539216188378	-0.0379631534313149	500	0.04	18	Seasonality	High
-0.0763229174526236	-0.0675798601879116	500	0.04	18	Seasonality	High
0.0249737074083753	0.0211386482811685	500	0.04	18	Seasonality	High
-0.0333763523431409	-0.0312334988873246	500	0.04	18	Seasonality	High
-0.0400166970989319	-0.0409696391255494	500	0.04	18	Seasonality	High
-0.00119661049011234	-0.00392929774214124	500	0.04	18	Seasonality	High
-0.0435675709644728	-0.0444524528561106	500	0.04	18	Seasonality	High
-0.0621846891320239	-0.0586694381858929	500	0.04	18	Seasonality	High
-0.00242028031008797	-0.00575795980641379	500	0.04	18	Seasonality	High
-0.0703406035206822	-0.0734418966285206	500	0.04	18	Seasonality	High
-0.0520287876650094	-0.05016191196093	500	0.04	18	Seasonality	High
-0.0639771587724479	-0.0631135819644201	500	0.04	18	Seasonality	High
-0.0167213303219426	-0.0165974705165906	500	0.04	18	Seasonality	High
