# Supplementary material for: The influence of biological, epidemiological, and treatment factors on the establishment and spread of drug-resistant Plasmodium falciparum
Source: eLife. 2022 Jul 7;11:e77634. doi: 10.7554/eLife.77634 (PMC9262398; doi:10.7554/eLife.77634)
Supplement: Appendix 1—figure 12—source data 1. [file elife-77634-app1-fig12-data1.csv]

Test_True	Test_predicted	Eir	Access_treatment	Resistance_level	Seasonality_pattern	Adherence_treatment
0.280486895618092	0.298882417116921	5	0.5	7	No seasonality	Low
0.323934379846715	0.317222864482707	5	0.5	7	No seasonality	Low
0.21377620096602	0.232513663882756	5	0.5	7	No seasonality	Low
0.276468480071804	0.249782691750866	5	0.5	7	No seasonality	Low
0.323769852035221	0.329972312168562	5	0.5	7	No seasonality	Low
0.305354439926982	0.295928587984169	5	0.5	7	No seasonality	Low
0.241197911129313	0.228222727805673	5	0.5	7	No seasonality	Low
0.314274823374609	0.32193211563309	5	0.5	7	No seasonality	Low
0.375391054704323	0.362254615533898	5	0.5	7	No seasonality	Low
0.201826754175456	0.208774413284502	5	0.5	7	No seasonality	Low
0.277453031911108	0.284220288759499	5	0.5	7	No seasonality	Low
0.216233469629433	0.22537284001113	5	0.5	7	No seasonality	Low
0.326730633914984	0.332511927751629	5	0.5	7	No seasonality	Low
0.138691042795934	0.15753400137031	5	0.5	7	No seasonality	Low
0.204547285685899	0.184403424890344	5	0.5	7	No seasonality	Low
0.302689547744603	0.293037308827182	5	0.5	7	No seasonality	Low
0.325212669305778	0.283916961274433	5	0.5	7	No seasonality	Low
0.291041834581835	0.284920447201834	5	0.5	7	No seasonality	Low
0.317194462786915	0.308634719918886	5	0.5	7	No seasonality	Low
0.253190454453667	0.246634365460627	5	0.5	7	No seasonality	Low
0.352179219723685	0.360663111296504	5	0.5	7	No seasonality	Low
0.32876686133136	0.307506087800793	5	0.5	7	No seasonality	Low
0.225447857688665	0.220384696114627	5	0.5	7	No seasonality	Low
0.317343437609233	0.317261993175098	5	0.5	7	No seasonality	Low
0.236147727978863	0.247296519553628	5	0.5	7	No seasonality	Low
0.320063473646303	0.314953442017023	5	0.5	7	No seasonality	Low
0.287267824085348	0.295423593423088	5	0.5	7	No seasonality	Low
0.0736788479306246	0.0734534653864621	5	0.5	7	No seasonality	Low
0.218658838557301	0.214238689697122	5	0.5	7	No seasonality	Low
0.100051701227694	0.109858499989868	5	0.5	7	No seasonality	Low
0.0333082468280352	0.0464090198437308	5	0.5	7	No seasonality	Low
0.214317887816834	0.219468155889722	5	0.5	7	No seasonality	Low
-0.0435220929324311	-0.053258006628027	5	0.5	7	No seasonality	Low
-0.0359315964346741	-0.0229895353073922	5	0.5	7	No seasonality	Low
0.140862635416986	0.122094809323106	5	0.5	7	No seasonality	Low
0.279259477364601	0.29207923192438	5	0.5	7	No seasonality	Low
0.125217708706681	0.146926934573411	5	0.5	7	No seasonality	Low
0.0157091027280613	-0.000784031925508771	5	0.5	7	No seasonality	Low
0.0657253561733448	0.0784111267183253	5	0.5	7	No seasonality	Low
0.291910902464847	0.299523874002796	5	0.5	7	No seasonality	Low
0.285002931724738	0.286479384346492	5	0.5	7	No seasonality	Low
0.141692659193427	0.124870413614549	5	0.5	7	No seasonality	Low
-0.00854424016754176	-0.00228260231438338	5	0.5	7	No seasonality	Low
0.278517071589972	0.272880829339153	5	0.5	7	No seasonality	Low
0.260874830505207	0.256354282668202	5	0.5	7	No seasonality	Low
0.0563557872915919	0.066792934798347	5	0.5	7	No seasonality	Low
0.277637537512694	0.289668514146864	5	0.5	7	No seasonality	Low
0.102897406039842	0.101534788825568	5	0.5	7	No seasonality	Low
0.274149863780892	0.288306091127602	5	0.5	7	No seasonality	Low
0.249260200643197	0.254239720336859	5	0.5	7	No seasonality	Low
0.292790801369055	0.285383201676421	5	0.5	7	No seasonality	Low
0.301897800127139	0.303414689905105	5	0.5	7	No seasonality	Low
-0.00168378668899225	-0.0214389054414951	5	0.5	7	No seasonality	Low
0.321652549480598	0.326637223322342	5	0.5	7	No seasonality	Low
0.123007427368835	0.125754468020679	5	0.5	7	No seasonality	Low
0.365207990799589	0.285023773420124	5	0.5	7	No seasonality	Low
0.30044422270649	0.302671503136818	5	0.5	7	No seasonality	Low
0.261611010333528	0.24810149892522	5	0.5	7	No seasonality	Low
0.299713116909991	0.295829538500203	5	0.5	7	No seasonality	Low
0.167971155694014	0.167183684750492	5	0.5	7	No seasonality	Low
0.297932979081397	0.300220715087033	5	0.5	7	No seasonality	Low
0.263262367762228	0.2548586072886	5	0.5	7	No seasonality	Low
0.0553600200618163	0.0659278233139696	5	0.5	7	No seasonality	Low
0.247447934844198	0.257168779943979	5	0.5	7	No seasonality	Low
0.272797506393025	0.299399937056111	5	0.5	7	No seasonality	Low
0.19028057326222	0.13502921616464	5	0.5	7	No seasonality	Low
0.228724123409828	0.212366077662531	5	0.5	7	No seasonality	Low
0.261739730380528	0.25088319917116	5	0.5	7	No seasonality	Low
0.0489480647412961	0.0589754801620649	5	0.5	7	No seasonality	Low
0.0627262172178709	0.067833997297113	5	0.5	7	No seasonality	Low
0.256578430427491	0.256155196426454	5	0.5	7	No seasonality	Low
0.0273966702786842	0.0194497390246873	5	0.5	7	No seasonality	Low
0.174358835706046	0.187345121704006	5	0.5	7	No seasonality	Low
0.217434931443593	0.21680000875365	5	0.5	7	No seasonality	Low
0.190792228181764	0.202341951383247	5	0.5	7	No seasonality	Low
0.281580304701355	0.284358772296256	5	0.5	7	No seasonality	Low
0.320628308273775	0.32353027651385	5	0.5	7	No seasonality	Low
0.127258159593781	0.142580489563886	5	0.5	7	No seasonality	Low
0.196070493192545	0.144831250081785	5	0.5	7	No seasonality	Low
0.318159297183029	0.314298324500196	5	0.5	7	No seasonality	Low
0.278335769907692	0.264428520446896	5	0.5	7	No seasonality	Low
0.0594294946911955	0.0403011190350238	5	0.5	7	No seasonality	Low
0.28922570857892	0.278161579974118	5	0.5	7	No seasonality	Low
0.269904070300804	0.283704180428692	5	0.5	7	No seasonality	Low
0.0301658413345898	0.0245814477781669	5	0.5	7	No seasonality	Low
0.278277341769146	0.279300008772113	5	0.5	7	No seasonality	Low
0.30358297335966	0.30610666155783	5	0.5	7	No seasonality	Low
0.290117014813886	0.284423994262464	5	0.5	7	No seasonality	Low
0.272259563812095	0.279148011117114	5	0.5	7	No seasonality	Low
0.302405108641968	0.332356537429071	5	0.5	7	No seasonality	Low
0.140782133624307	0.138042144444207	5	0.5	7	No seasonality	Low
0.316192188557729	0.315664111351607	5	0.5	7	No seasonality	Low
0.20870278645805	0.181339407532957	5	0.5	7	No seasonality	Low
0.0748142260411567	0.11121392722244	5	0.5	7	No seasonality	Low
0.257024481089439	0.277550595334837	5	0.5	7	No seasonality	Low
0.112414293162808	0.122059240041776	5	0.5	7	No seasonality	Low
0.337688925191553	0.33546735833247	5	0.5	7	No seasonality	Low
0.132804370835945	0.148659354736468	5	0.5	7	No seasonality	Low
0.240913838726189	0.177997527079869	5	0.5	7	No seasonality	Low
0.112986553452584	0.162716807070609	5	0.5	7	No seasonality	Low
0.225179134723913	0.231741051969969	5	0.5	7	No seasonality	Low
0.0312421885392301	0.0492103088324794	5	0.5	7	No seasonality	Low
0.277697319486601	0.269687385421198	5	0.5	7	No seasonality	Low
0.303091299887599	0.29966010936809	5	0.5	7	No seasonality	Low
0.302518921258289	0.303178673820821	5	0.5	7	No seasonality	Low
0.298836118236942	0.306164608991359	10	0.5	7	No seasonality	Low
0.306392065433208	0.299524521761809	10	0.5	7	No seasonality	Low
0.102933126824195	0.168410295743515	10	0.5	7	No seasonality	Low
0.312880214215165	0.336872526732436	10	0.5	7	No seasonality	Low
0.229386786864566	0.227509595774335	10	0.5	7	No seasonality	Low
0.241565687076992	0.216587861974464	10	0.5	7	No seasonality	Low
0.256703565318203	0.254226022413908	10	0.5	7	No seasonality	Low
0.221771343322743	0.22127720764996	10	0.5	7	No seasonality	Low
0.075584505952715	0.0656782481064224	10	0.5	7	No seasonality	Low
0.187739052860359	0.20723941696759	10	0.5	7	No seasonality	Low
0.243648780382329	0.24481534261877	10	0.5	7	No seasonality	Low
0.242618966712948	0.243013333468252	10	0.5	7	No seasonality	Low
0.257327656165382	0.274897764826716	10	0.5	7	No seasonality	Low
0.239806015941208	0.242940176042952	10	0.5	7	No seasonality	Low
0.147406581524604	0.115230762705208	10	0.5	7	No seasonality	Low
0.115475673679242	0.110759367033367	10	0.5	7	No seasonality	Low
0.25973707650695	0.250240262113991	10	0.5	7	No seasonality	Low
0.172905644923808	0.186914559689851	10	0.5	7	No seasonality	Low
0.260118564124771	0.268319513952471	10	0.5	7	No seasonality	Low
0.268702399686596	0.27071375632217	10	0.5	7	No seasonality	Low
0.206676400983671	0.205311019824879	10	0.5	7	No seasonality	Low
0.321501341730667	0.325226709090812	10	0.5	7	No seasonality	Low
0.272974958178227	0.276975622615055	10	0.5	7	No seasonality	Low
0.212902268121922	0.214110346068908	10	0.5	7	No seasonality	Low
0.324401906004522	0.357025519282012	10	0.5	7	No seasonality	Low
0.243322036179101	0.256122318824641	10	0.5	7	No seasonality	Low
0.254126522085333	0.248938020944904	10	0.5	7	No seasonality	Low
0.271856765016196	0.266824240656443	10	0.5	7	No seasonality	Low
0.213670867543229	0.236489079584086	10	0.5	7	No seasonality	Low
0.260291039954253	0.264297354902258	10	0.5	7	No seasonality	Low
0.243733358312731	0.241792050453822	10	0.5	7	No seasonality	Low
0.23009494084938	0.229728133453029	10	0.5	7	No seasonality	Low
0.221591825414755	0.220808114211349	10	0.5	7	No seasonality	Low
0.289866376164075	0.285600080919878	10	0.5	7	No seasonality	Low
0.221203898438448	0.233628919503018	10	0.5	7	No seasonality	Low
0.268243585399203	0.261731853919114	10	0.5	7	No seasonality	Low
0.234622209086065	0.238442009885349	10	0.5	7	No seasonality	Low
0.227020357615077	0.236280769317673	10	0.5	7	No seasonality	Low
0.263884439866511	0.261889684861709	10	0.5	7	No seasonality	Low
0.211273790205665	0.205284843704098	10	0.5	7	No seasonality	Low
0.253032089191498	0.261740558509809	10	0.5	7	No seasonality	Low
0.0370631385121974	0.0387918423340267	10	0.5	7	No seasonality	Low
0.246339567574724	0.253129841506632	10	0.5	7	No seasonality	Low
0.245104512634656	0.243978007910393	10	0.5	7	No seasonality	Low
0.102794512583741	0.108118437116145	10	0.5	7	No seasonality	Low
0.233003679135054	0.232332806901937	10	0.5	7	No seasonality	Low
0.213782145104772	0.224253922234534	10	0.5	7	No seasonality	Low
0.230143269521427	0.213802928123962	10	0.5	7	No seasonality	Low
0.178421204305468	0.188630739771609	10	0.5	7	No seasonality	Low
0.173621248993343	0.184943580975532	10	0.5	7	No seasonality	Low
0.131661181031	0.157727497833756	10	0.5	7	No seasonality	Low
0.139045696183297	0.166893192508901	10	0.5	7	No seasonality	Low
0.290249570227692	0.288571035124586	10	0.5	7	No seasonality	Low
0.189835487316343	0.131144076833493	10	0.5	7	No seasonality	Low
-0.0208986244744773	-0.0187041219075338	10	0.5	7	No seasonality	Low
0.0249872787725669	0.0298063171129201	10	0.5	7	No seasonality	Low
0.181486924210013	0.169076886748454	10	0.5	7	No seasonality	Low
0.258917531125357	0.271038428670073	10	0.5	7	No seasonality	Low
0.185596588910454	0.179302732264089	10	0.5	7	No seasonality	Low
-0.0252363235523226	-0.0260625980441307	10	0.5	7	No seasonality	Low
0.229622074870002	0.218320143209512	10	0.5	7	No seasonality	Low
0.0308115362317557	0.0296643489866454	10	0.5	7	No seasonality	Low
0.196786759371932	0.199288342126914	10	0.5	7	No seasonality	Low
0.0240872723127424	0.0212952709299338	10	0.5	7	No seasonality	Low
0.139364285634832	0.141493591721379	10	0.5	7	No seasonality	Low
0.196689278211584	0.191175003904844	10	0.5	7	No seasonality	Low
0.277659490706606	0.272785213287126	10	0.5	7	No seasonality	Low
0.24477313708465	0.244547450330776	10	0.5	7	No seasonality	Low
0.0836734256084105	0.0843722583060749	10	0.5	7	No seasonality	Low
0.0301724513742576	0.0263153660099051	10	0.5	7	No seasonality	Low
0.207547320814776	0.190671952523759	10	0.5	7	No seasonality	Low
0.225918842528	0.220118367841315	10	0.5	7	No seasonality	Low
0.0877575431334156	0.090600005985191	10	0.5	7	No seasonality	Low
-0.0195205896500411	-0.0223614180693661	10	0.5	7	No seasonality	Low
-0.0266273355698895	-0.021260333259719	10	0.5	7	No seasonality	Low
0.0391748576830295	0.0357950379472948	10	0.5	7	No seasonality	Low
-0.0123720771884175	-0.0133207378417473	10	0.5	7	No seasonality	Low
0.0842047124383107	0.0827299123910183	10	0.5	7	No seasonality	Low
0.0222137054910888	0.0305548462238788	10	0.5	7	No seasonality	Low
0.010248211270211	0.00904716360315169	10	0.5	7	No seasonality	Low
0.0114825948896718	0.0206981652698566	10	0.5	7	No seasonality	Low
0.152430594737696	0.232629520798796	10	0.5	7	No seasonality	Low
0.0320633677591895	0.024613644943051	10	0.5	7	No seasonality	Low
0.102256214365649	0.120177275346803	10	0.5	7	No seasonality	Low
0.0615246343743499	0.0778003588744063	10	0.5	7	No seasonality	Low
0.0519281323653271	0.0439562416916273	10	0.5	7	No seasonality	Low
0.100030953065523	0.104520833806102	10	0.5	7	No seasonality	Low
0.076141994419775	0.0832663257705976	10	0.5	7	No seasonality	Low
0.227879141139505	0.216027980246697	10	0.5	7	No seasonality	Low
0.161548251619271	0.14893633259161	10	0.5	7	No seasonality	Low
0.0635086160829927	0.0671615237073717	10	0.5	7	No seasonality	Low
-0.0317986353643157	-0.0324226730708335	10	0.5	7	No seasonality	Low
0.22576496521376	0.2368385063362	10	0.5	7	No seasonality	Low
0.0326718950398015	0.0389423949154174	10	0.5	7	No seasonality	Low
0.120738922565861	0.0834374186883133	10	0.5	7	No seasonality	Low
0.187612127937747	0.179997733724428	10	0.5	7	No seasonality	Low
0.0717041774627644	0.0711836847237471	10	0.5	7	No seasonality	Low
0.0706835172423993	0.078414472589093	10	0.5	7	No seasonality	Low
0.282494945093223	0.288312941546799	10	0.5	7	No seasonality	Low
0.0174681137333445	0.0269869785498846	10	0.5	7	No seasonality	Low
0.138273211890822	0.144311747492724	10	0.5	7	No seasonality	Low
0.176313427526635	0.170212297647548	10	0.5	7	No seasonality	Low
0.113759308723092	0.10643346118709	10	0.5	7	No seasonality	Low
0.217232600942591	0.210636349641243	10	0.5	7	No seasonality	Low
0.170880410550038	0.167775962358107	10	0.5	7	No seasonality	Low
0.166709841187215	0.161985327409915	500	0.5	7	No seasonality	Low
0.247612669965491	0.24988896057751	500	0.5	7	No seasonality	Low
0.130862780121653	0.180414213180278	500	0.5	7	No seasonality	Low
0.214751001125846	0.224601519507913	500	0.5	7	No seasonality	Low
0.170609671658132	0.15638223894492	500	0.5	7	No seasonality	Low
0.145224754378822	0.15233927139397	500	0.5	7	No seasonality	Low
0.192273968798041	0.197262584268282	500	0.5	7	No seasonality	Low
0.186071252176027	0.200709966158062	500	0.5	7	No seasonality	Low
0.132118709525073	0.142140398443134	500	0.5	7	No seasonality	Low
0.177079424187041	0.161212434851662	500	0.5	7	No seasonality	Low
0.216119733918897	0.218806470408179	500	0.5	7	No seasonality	Low
0.174789910058716	0.162281040914684	500	0.5	7	No seasonality	Low
0.146337082827012	0.123387528755663	500	0.5	7	No seasonality	Low
0.0888137948776613	0.13728768922013	500	0.5	7	No seasonality	Low
0.139210590927816	0.144823901432247	500	0.5	7	No seasonality	Low
0.170802596587629	0.170307877208183	500	0.5	7	No seasonality	Low
0.122139384157674	0.087210648832526	500	0.5	7	No seasonality	Low
0.140891067494872	0.134499677545635	500	0.5	7	No seasonality	Low
0.139879577744746	0.144050950688092	500	0.5	7	No seasonality	Low
0.189868337897603	0.207916210153759	500	0.5	7	No seasonality	Low
0.131676664489974	0.144145356422289	500	0.5	7	No seasonality	Low
0.261725171351752	0.28253695284865	500	0.5	7	No seasonality	Low
0.179566666322443	0.166331616804987	500	0.5	7	No seasonality	Low
0.219416474761485	0.201501924665756	500	0.5	7	No seasonality	Low
0.157309106432529	0.165772220474622	500	0.5	7	No seasonality	Low
0.258318077617212	0.246457771155335	500	0.5	7	No seasonality	Low
0.0352782609380847	0.031384953451412	500	0.5	7	No seasonality	Low
0.147570448404365	0.136522219301003	500	0.5	7	No seasonality	Low
0.256328466195227	0.245267020174249	500	0.5	7	No seasonality	Low
0.165330968307141	0.171918475032116	500	0.5	7	No seasonality	Low
0.18585970107682	0.16952184003081	500	0.5	7	No seasonality	Low
0.158951904402127	0.156750262822788	500	0.5	7	No seasonality	Low
0.265849216600265	0.254171017838823	500	0.5	7	No seasonality	Low
0.149468983129883	0.15385236147529	500	0.5	7	No seasonality	Low
0.193279240130655	0.182162760979496	500	0.5	7	No seasonality	Low
0.185684248101535	0.181868458108182	500	0.5	7	No seasonality	Low
0.111757622345606	0.117355245745156	500	0.5	7	No seasonality	Low
0.0341191063402389	0.0348987763696806	500	0.5	7	No seasonality	Low
0.00480207676595491	0.00205490619485491	500	0.5	7	No seasonality	Low
0.164089099620812	0.165528584870686	500	0.5	7	No seasonality	Low
0.117694878168734	0.122622155545125	500	0.5	7	No seasonality	Low
0.200226161523607	0.201750396219477	500	0.5	7	No seasonality	Low
-0.0419664031726226	-0.0314008435967206	500	0.5	7	No seasonality	Low
0.0816034566204173	0.0661540163750708	500	0.5	7	No seasonality	Low
0.14457012158615	0.127933161576686	500	0.5	7	No seasonality	Low
0.140065751500451	0.139980293256291	500	0.5	7	No seasonality	Low
0.153068289208953	0.136734827802283	500	0.5	7	No seasonality	Low
0.0897326816801824	0.0920716558257724	500	0.5	7	No seasonality	Low
-0.00196254763764666	-0.000563131534230876	500	0.5	7	No seasonality	Low
0.161348415397777	0.156240970288926	500	0.5	7	No seasonality	Low
0.133798425247885	0.129523986718156	500	0.5	7	No seasonality	Low
0.075788443207851	0.0713140942162461	500	0.5	7	No seasonality	Low
0.204899424107793	0.219483158934148	500	0.5	7	No seasonality	Low
0.0380420916364495	0.0403242436437475	500	0.5	7	No seasonality	Low
0.0797573006000176	0.0853291847825299	500	0.5	7	No seasonality	Low
-0.0490708971753812	-0.0510659274197715	500	0.5	7	No seasonality	Low
0.132172361467894	0.126158563332292	500	0.5	7	No seasonality	Low
0.123584840734242	0.109559157300231	500	0.5	7	No seasonality	Low
0.236755305991975	0.248892209252904	500	0.5	7	No seasonality	Low
0.212218997505457	0.202761311787061	500	0.5	7	No seasonality	Low
0.140409304900312	0.137921969944207	500	0.5	7	No seasonality	Low
0.131410658957754	0.144541075645166	500	0.5	7	No seasonality	Low
0.063406945553721	0.0546626494211634	500	0.5	7	No seasonality	Low
0.108286888864579	0.0905453170272444	500	0.5	7	No seasonality	Low
0.231223732889174	0.235424910161244	500	0.5	7	No seasonality	Low
0.14565206293847	0.130695927173653	500	0.5	7	No seasonality	Low
0.00532807798893637	-0.00195987927585951	500	0.5	7	No seasonality	Low
0.107587663401782	0.113884562832106	500	0.5	7	No seasonality	Low
0.0568704386409471	0.0666038932172691	500	0.5	7	No seasonality	Low
0.0338787305391876	0.035349031765137	500	0.5	7	No seasonality	Low
0.159816374880845	0.159769176694506	500	0.5	7	No seasonality	Low
0.13214557337067	0.141010162758842	500	0.5	7	No seasonality	Low
-0.00451415465375135	-0.0243942742338311	500	0.5	7	No seasonality	Low
-0.0513699126198051	-0.0847630423645478	500	0.5	7	No seasonality	Low
0.0229926760702053	0.014250473822207	500	0.5	7	No seasonality	Low
0.0619122352821209	0.0550778800090633	500	0.5	7	No seasonality	Low
-0.0052348267733037	-0.00388068507151045	500	0.5	7	No seasonality	Low
0.11261004903236	0.101997709295345	500	0.5	7	No seasonality	Low
-0.0207215280089041	-0.0161784526549347	500	0.5	7	No seasonality	Low
0.122169621574748	0.110479448552178	500	0.5	7	No seasonality	Low
0.037698049818287	0.0438018399243777	500	0.5	7	No seasonality	Low
0.0274567869631359	0.036766978687129	500	0.5	7	No seasonality	Low
0.199401149710445	0.205130685555572	500	0.5	7	No seasonality	Low
0.0856137756636084	0.0835019732042703	500	0.5	7	No seasonality	Low
0.173884544537916	0.175701749432508	500	0.5	7	No seasonality	Low
0.224363224576382	0.201530532081353	500	0.5	7	No seasonality	Low
0.226094953614899	0.233905093271023	500	0.5	7	No seasonality	Low
0.015738856100948	0.0248809328516003	500	0.5	7	No seasonality	Low
0.0433114001317289	0.0567700023757185	500	0.5	7	No seasonality	Low
0.133020631388989	0.156787630323666	500	0.5	7	No seasonality	Low
0.0781198614769588	0.0666051113750308	500	0.5	7	No seasonality	Low
-0.0311323854249919	-0.0167748349630678	500	0.5	7	No seasonality	Low
0.113546152787901	0.115870712288789	500	0.5	7	No seasonality	Low
0.15485787496158	0.15890639930002	500	0.5	7	No seasonality	Low
0.0318174887430604	0.0398401666609732	500	0.5	7	No seasonality	Low
0.00100186163797095	0.00776406424499224	500	0.5	7	No seasonality	Low
0.134875586996205	0.133385922257486	500	0.5	7	No seasonality	Low
-0.00637036594418585	-0.00796794197030778	500	0.5	7	No seasonality	Low
0.1312265627848	0.138756927234786	500	0.5	7	No seasonality	Low
0.104145873591612	0.110871884788048	500	0.5	7	No seasonality	Low
0.0160163456058637	0.0183039067266929	500	0.5	7	No seasonality	Low
0.0205745596147105	0.0255355169956424	500	0.5	7	No seasonality	Low
0.0261027232446713	0.0286181960553292	500	0.5	7	No seasonality	Low
-0.0271021001409037	-0.0321470229513072	500	0.5	7	No seasonality	Low
0.144804861469097	0.143682926146555	500	0.5	7	No seasonality	Low
0.230285705330299	0.209206491833496	5	0.5	7	No seasonality	High
0.165558455623141	0.199031539930882	5	0.5	7	No seasonality	High
0.30521196233344	0.329131003539939	5	0.5	7	No seasonality	High
0.323930637463664	0.322548938038922	5	0.5	7	No seasonality	High
0.195723023966535	0.206569746950095	5	0.5	7	No seasonality	High
0.276369080517453	0.270254727871433	5	0.5	7	No seasonality	High
0.00736563608177878	-0.0381500680663021	5	0.5	7	No seasonality	High
0.172760137590465	0.185466615012717	5	0.5	7	No seasonality	High
-0.0434371158500766	-0.0581016976885066	5	0.5	7	No seasonality	High
0.0413629510767441	0.0349769163773852	5	0.5	7	No seasonality	High
0.245414683850847	0.243439813739201	5	0.5	7	No seasonality	High
0.262709011770492	0.286180228452007	5	0.5	7	No seasonality	High
0.192812481736069	0.131791461579154	5	0.5	7	No seasonality	High
0.263380767077394	0.272859524085387	5	0.5	7	No seasonality	High
0.284456914730186	0.289430205115483	5	0.5	7	No seasonality	High
0.26163636829317	0.245846401627067	5	0.5	7	No seasonality	High
0.18747202826261	0.165814865508493	5	0.5	7	No seasonality	High
-0.0127465524447462	-0.0322405756425324	5	0.5	7	No seasonality	High
0.274629780222415	0.236803795859596	5	0.5	7	No seasonality	High
0.0659192685467842	0.068172602352283	5	0.5	7	No seasonality	High
0.0280555761207006	0.0368526651943328	5	0.5	7	No seasonality	High
0.242819200545898	0.271516805915407	5	0.5	7	No seasonality	High
0.264830604307667	0.278780408415611	5	0.5	7	No seasonality	High
-0.0294317012141081	-0.0157191597176469	5	0.5	7	No seasonality	High
0.163357096061677	0.14880079494899	5	0.5	7	No seasonality	High
0.0392211792054522	0.0454432349301812	5	0.5	7	No seasonality	High
0.320970690522736	0.324549339792688	5	0.5	7	No seasonality	High
0.0737039072921329	0.0845940853923966	5	0.5	7	No seasonality	High
-0.0274781546317709	-0.013412252863077	5	0.5	7	No seasonality	High
0.19596375503087	0.202833139591236	5	0.5	7	No seasonality	High
0.271475226440977	0.269348425349614	5	0.5	7	No seasonality	High
-0.0332132365968077	-0.0361539089015169	5	0.5	7	No seasonality	High
-0.0182842619965342	-0.0164879092329039	5	0.5	7	No seasonality	High
-0.0573558303180507	-0.0588571157500037	5	0.5	7	No seasonality	High
-0.00109700222982062	-0.0119674109229569	5	0.5	7	No seasonality	High
0.00294074202221554	0.00403827363893286	5	0.5	7	No seasonality	High
-0.0474100016375388	-0.0458215699805484	5	0.5	7	No seasonality	High
-0.0513818990452118	-0.0504334116299509	5	0.5	7	No seasonality	High
-0.0435959992722419	-0.023444477080814	5	0.5	7	No seasonality	High
-0.00471708402284343	-0.00646429314546113	5	0.5	7	No seasonality	High
-0.0258184249230654	-0.0319918777789152	5	0.5	7	No seasonality	High
-0.0479393527216479	-0.0541368593002978	5	0.5	7	No seasonality	High
-0.0278153815307714	-0.00929077687065413	5	0.5	7	No seasonality	High
-0.0580793699097716	-0.0588296803877232	5	0.5	7	No seasonality	High
-0.00185808237188777	0.0192658491251738	5	0.5	7	No seasonality	High
-0.0426550773691016	-0.0471643213803053	5	0.5	7	No seasonality	High
-0.0542536043444973	-0.0395848311400716	5	0.5	7	No seasonality	High
-0.0283452890475732	-0.0192612408305529	5	0.5	7	No seasonality	High
-0.00488137239398482	-0.0159134302344371	5	0.5	7	No seasonality	High
-0.0422775493551934	-0.0401421850100299	5	0.5	7	No seasonality	High
0.183351988561457	0.163291832649522	10	0.5	7	No seasonality	High
0.142076134454842	0.142366645636915	10	0.5	7	No seasonality	High
0.255513730560561	0.284772533250964	10	0.5	7	No seasonality	High
0.20232170987938	0.240398439178814	10	0.5	7	No seasonality	High
0.0957973192386705	0.11426482024858	10	0.5	7	No seasonality	High
0.00406066459601351	-0.0130331005596664	10	0.5	7	No seasonality	High
-0.0529527626372371	-0.0427476983235659	10	0.5	7	No seasonality	High
0.204524875038312	0.203646833855188	10	0.5	7	No seasonality	High
-0.025178894194838	-0.0252679145060182	10	0.5	7	No seasonality	High
0.191069736422507	0.199880505612342	10	0.5	7	No seasonality	High
0.153293133745821	0.0948439777105841	10	0.5	7	No seasonality	High
0.14858687377106	0.156953933761809	10	0.5	7	No seasonality	High
0.230881391317987	0.240029236136028	10	0.5	7	No seasonality	High
-0.0107490594470138	-0.00848443549088494	10	0.5	7	No seasonality	High
0.153694321408677	0.198388431307199	10	0.5	7	No seasonality	High
0.166770949961157	0.152547988326781	10	0.5	7	No seasonality	High
0.190952292622165	0.16367704797742	10	0.5	7	No seasonality	High
0.261693807762446	0.236909490667458	10	0.5	7	No seasonality	High
0.137959023815021	0.114604888231063	10	0.5	7	No seasonality	High
-0.0673148952685907	-0.0621945877496437	10	0.5	7	No seasonality	High
-0.0503988871370223	-0.0281691010071995	10	0.5	7	No seasonality	High
0.17807798501789	0.171792380232554	10	0.5	7	No seasonality	High
0.201842877530987	0.185126602701137	10	0.5	7	No seasonality	High
0.172499401979004	0.181295848043512	10	0.5	7	No seasonality	High
0.26721758956711	0.272431819221238	10	0.5	7	No seasonality	High
0.20848616231351	0.202268822872645	10	0.5	7	No seasonality	High
0.24539869412271	0.243848004624677	10	0.5	7	No seasonality	High
0.134533709018125	0.139540299449235	10	0.5	7	No seasonality	High
0.0423265928416868	0.0723922450938743	10	0.5	7	No seasonality	High
0.201941426560187	0.208671986765664	10	0.5	7	No seasonality	High
0.166562699290756	0.163740850584762	10	0.5	7	No seasonality	High
-0.00230385268337336	0.00293927478301211	10	0.5	7	No seasonality	High
-0.0683705230582063	-0.0774822861903381	10	0.5	7	No seasonality	High
-0.0205177856225125	-0.025013359359661	10	0.5	7	No seasonality	High
-0.0609512697439699	-0.0556390797042429	10	0.5	7	No seasonality	High
-0.0591790288985215	-0.0550414349396357	10	0.5	7	No seasonality	High
-0.0493028396335786	-0.0372290697588273	10	0.5	7	No seasonality	High
-0.0205360118333564	-0.0143699512193394	10	0.5	7	No seasonality	High
-0.0442587717158658	-0.0337672307064184	10	0.5	7	No seasonality	High
-0.0321795543243887	-0.0509106888387239	10	0.5	7	No seasonality	High
-0.0207119021806592	-0.0268700836654191	10	0.5	7	No seasonality	High
-0.019750783657497	-0.014830958979328	10	0.5	7	No seasonality	High
-0.015962338909357	-0.00281672617063421	10	0.5	7	No seasonality	High
-0.028915581285807	-0.0200081102342951	10	0.5	7	No seasonality	High
-0.0489047764836968	-0.0494545649278029	10	0.5	7	No seasonality	High
-0.00384817562118176	0.00485018069224565	10	0.5	7	No seasonality	High
-0.0375646369692625	-0.0423936036243917	10	0.5	7	No seasonality	High
-0.000719051957111524	0.00707713764509967	10	0.5	7	No seasonality	High
-0.0150364322365396	0.0172082481366082	10	0.5	7	No seasonality	High
-0.0622345516810851	-0.0575846893564965	10	0.5	7	No seasonality	High
0.109447068824352	0.0990149297409303	500	0.5	7	No seasonality	High
0.210584975724878	0.215931133159048	500	0.5	7	No seasonality	High
0.215392372618865	0.20525706956033	500	0.5	7	No seasonality	High
0.198789817871913	0.193872583349336	500	0.5	7	No seasonality	High
0.0217973943052197	0.0822330516769546	500	0.5	7	No seasonality	High
0.145741203028215	0.155725935287467	500	0.5	7	No seasonality	High
0.139499250462974	0.125553457982913	500	0.5	7	No seasonality	High
-0.0725266001987685	-0.0734792714547403	500	0.5	7	No seasonality	High
0.136321188335802	0.11909789737196	500	0.5	7	No seasonality	High
0.171114028545085	0.177196460450833	500	0.5	7	No seasonality	High
-0.0193212162851084	-0.0342830609165894	500	0.5	7	No seasonality	High
0.152765365254359	0.150105107484457	500	0.5	7	No seasonality	High
0.110256989865265	0.0895536844898442	500	0.5	7	No seasonality	High
-0.0261140756248034	-0.03709825761818	500	0.5	7	No seasonality	High
0.21839859283556	0.221945250643322	500	0.5	7	No seasonality	High
0.00119629648096538	0.0355379053088928	500	0.5	7	No seasonality	High
0.081020198882149	0.0771803918225215	500	0.5	7	No seasonality	High
-0.0578866595265859	-0.0638514338350079	500	0.5	7	No seasonality	High
-0.0529542101472807	-0.0781120962601237	500	0.5	7	No seasonality	High
0.169312411889862	0.168755936705611	500	0.5	7	No seasonality	High
0.131630285404701	0.131720343407867	500	0.5	7	No seasonality	High
0.0559554831687845	0.0521781626527226	500	0.5	7	No seasonality	High
0.137814743574464	0.126055890204936	500	0.5	7	No seasonality	High
0.0653868919507285	0.0568794988590427	500	0.5	7	No seasonality	High
0.0972896112806316	0.0872507759523344	500	0.5	7	No seasonality	High
0.19905296254536	0.200017348329994	500	0.5	7	No seasonality	High
0.0824235630576997	0.0862089414343526	500	0.5	7	No seasonality	High
0.148347105066437	0.138976409516397	500	0.5	7	No seasonality	High
0.196310186484198	0.1873994907181	500	0.5	7	No seasonality	High
0.211070631333524	0.222234661575098	500	0.5	7	No seasonality	High
0.113873905005305	0.114490554130369	500	0.5	7	No seasonality	High
0.0593755165314171	0.0568942787334523	500	0.5	7	No seasonality	High
0.164336353408348	0.160375007547959	500	0.5	7	No seasonality	High
0.123571634501611	0.118860740524025	500	0.5	7	No seasonality	High
-0.0447064645805828	-0.0423281432056266	500	0.5	7	No seasonality	High
-0.0368810928849952	-0.0308451198769661	500	0.5	7	No seasonality	High
-0.0134523062602902	-0.0163503957109699	500	0.5	7	No seasonality	High
-0.073645456681606	-0.0744928916763812	500	0.5	7	No seasonality	High
-0.0784142675319149	-0.0770827597334556	500	0.5	7	No seasonality	High
-0.00941853690033853	-0.0165193545070257	500	0.5	7	No seasonality	High
-0.0137333042055294	0.000723436692949476	500	0.5	7	No seasonality	High
-0.0730007133014186	-0.0774926293283826	500	0.5	7	No seasonality	High
-0.0666036815813699	-0.0692104718020309	500	0.5	7	No seasonality	High
-0.0776268887136781	-0.0744190461264003	500	0.5	7	No seasonality	High
-0.0428463026629824	-0.041746081621046	500	0.5	7	No seasonality	High
-0.0326785822488798	-0.0374916868751507	500	0.5	7	No seasonality	High
-0.0499075514599885	-0.0454339059662872	500	0.5	7	No seasonality	High
-0.0820562395084936	-0.0864641277930669	500	0.5	7	No seasonality	High
-0.0232906070426839	-0.0359361109813608	500	0.5	7	No seasonality	High
-0.00518892349313181	0.00019023102331598	500	0.5	7	No seasonality	High
0.369592089769709	0.381316857253566	5	0.5	7	Seasonality	Low
0.392904435255504	0.387836315550393	5	0.5	7	Seasonality	Low
0.40579796733243	0.406280939209191	5	0.5	7	Seasonality	Low
0.317318230690001	0.261838045285282	5	0.5	7	Seasonality	Low
0.37845248392711	0.374481937323556	5	0.5	7	Seasonality	Low
0.371674794019202	0.383601295551994	5	0.5	7	Seasonality	Low
0.411192567471493	0.417384822626578	5	0.5	7	Seasonality	Low
0.423320451878147	0.411960422708368	5	0.5	7	Seasonality	Low
0.400081154162594	0.40144822499076	5	0.5	7	Seasonality	Low
0.386502696381942	0.384301483305819	5	0.5	7	Seasonality	Low
0.311391921102368	0.319265987242519	5	0.5	7	Seasonality	Low
0.406141434681322	0.397115834130361	5	0.5	7	Seasonality	Low
0.280096415938159	0.169068215692983	5	0.5	7	Seasonality	Low
0.398067213998018	0.406726559536923	5	0.5	7	Seasonality	Low
0.15515625223692	0.117573872464296	5	0.5	7	Seasonality	Low
0.399305150886169	0.39338688217521	5	0.5	7	Seasonality	Low
0.248813245334543	0.287880784450197	5	0.5	7	Seasonality	Low
0.206641514181168	0.149318033128763	5	0.5	7	Seasonality	Low
0.380198689275343	0.389477610093967	5	0.5	7	Seasonality	Low
0.384416855921258	0.382094028814444	5	0.5	7	Seasonality	Low
0.0091512849075312	0.0581809235781973	5	0.5	7	Seasonality	Low
0.385277501229162	0.384631258070718	5	0.5	7	Seasonality	Low
0.381862480094707	0.382802701386264	5	0.5	7	Seasonality	Low
0.259345972018454	0.225164396361129	5	0.5	7	Seasonality	Low
0.273219222373057	0.206111725334734	5	0.5	7	Seasonality	Low
0.414244603689496	0.393689870748224	5	0.5	7	Seasonality	Low
0.398010506551572	0.39468188556283	5	0.5	7	Seasonality	Low
0.132843897649882	0.106216566425052	5	0.5	7	Seasonality	Low
0.0821693331205154	0.121630268229176	5	0.5	7	Seasonality	Low
0.405694578279651	0.402971875213711	5	0.5	7	Seasonality	Low
0.407879878199789	0.414018352925063	5	0.5	7	Seasonality	Low
0.404938963086032	0.408286742516682	5	0.5	7	Seasonality	Low
0.378376221243947	0.374617803579453	5	0.5	7	Seasonality	Low
0.412934470758518	0.408539176600497	5	0.5	7	Seasonality	Low
0.39580354162678	0.41699286033963	5	0.5	7	Seasonality	Low
0.394272083104743	0.396121637980929	5	0.5	7	Seasonality	Low
0.368016573306454	0.365113277293318	5	0.5	7	Seasonality	Low
0.408029617297228	0.416989129120539	5	0.5	7	Seasonality	Low
0.380370123466743	0.370110584535439	5	0.5	7	Seasonality	Low
0.405280215916385	0.400576642744544	5	0.5	7	Seasonality	Low
0.393665263448484	0.404476355877136	5	0.5	7	Seasonality	Low
0.395711998380645	0.387727499493296	5	0.5	7	Seasonality	Low
0.149504526484721	0.141486877633398	5	0.5	7	Seasonality	Low
0.206692447508962	0.214178526236094	5	0.5	7	Seasonality	Low
0.0612950010465681	0.0886798400421341	5	0.5	7	Seasonality	Low
0.316894271373966	0.272972046241553	5	0.5	7	Seasonality	Low
0.197640405663318	0.192089323798468	5	0.5	7	Seasonality	Low
0.0839724216400727	0.0991675828864206	5	0.5	7	Seasonality	Low
0.0829219116180546	0.101296507744685	5	0.5	7	Seasonality	Low
0.402346332296222	0.409628754188087	5	0.5	7	Seasonality	Low
0.366797134590221	0.390532486818583	5	0.5	7	Seasonality	Low
0.0332604544254337	0.0151209914712291	5	0.5	7	Seasonality	Low
0.354239893825014	0.341854411452599	5	0.5	7	Seasonality	Low
0.004679025799574	-0.0154311670886278	5	0.5	7	Seasonality	Low
0.0161582170146372	0.0277713382165863	5	0.5	7	Seasonality	Low
0.272338171776404	0.268999634739703	5	0.5	7	Seasonality	Low
0.404631240314449	0.411157674253122	5	0.5	7	Seasonality	Low
0.161967620529524	0.154442442935583	5	0.5	7	Seasonality	Low
0.0683408154425183	0.0846876166508954	5	0.5	7	Seasonality	Low
0.127071075451647	0.115408900932179	5	0.5	7	Seasonality	Low
0.051281016032451	0.171432888970398	5	0.5	7	Seasonality	Low
0.0933405426608275	0.147481372405569	5	0.5	7	Seasonality	Low
0.241299003876373	0.231060289389023	5	0.5	7	Seasonality	Low
0.36846949000315	0.353955904330762	5	0.5	7	Seasonality	Low
0.411416431034671	0.409996297375288	5	0.5	7	Seasonality	Low
0.414990180349181	0.409396332434849	5	0.5	7	Seasonality	Low
0.407589084376271	0.408180696910889	5	0.5	7	Seasonality	Low
0.366737124766746	0.373680757397025	5	0.5	7	Seasonality	Low
0.329280415151427	0.279144104950253	5	0.5	7	Seasonality	Low
0.379083014630389	0.383246029399677	5	0.5	7	Seasonality	Low
0.271120034830752	0.193989789254177	5	0.5	7	Seasonality	Low
0.362778535739879	0.359256205219485	5	0.5	7	Seasonality	Low
0.170830031063174	0.161888536874983	5	0.5	7	Seasonality	Low
0.105567135656466	0.101874893214589	5	0.5	7	Seasonality	Low
0.399665730688817	0.396359534306737	5	0.5	7	Seasonality	Low
0.362551263213877	0.322493551192866	5	0.5	7	Seasonality	Low
0.40663274246571	0.415083210457763	5	0.5	7	Seasonality	Low
0.381617515505443	0.378596091136802	5	0.5	7	Seasonality	Low
0.253891813648183	0.227581192684916	5	0.5	7	Seasonality	Low
0.293799383235863	0.247880920466312	5	0.5	7	Seasonality	Low
0.379146450206089	0.379078630953307	5	0.5	7	Seasonality	Low
0.416405293390455	0.411709823326881	5	0.5	7	Seasonality	Low
0.377938366549067	0.380141228241102	5	0.5	7	Seasonality	Low
0.412972219412289	0.415055548251073	5	0.5	7	Seasonality	Low
0.0823643576260728	0.101677444522436	5	0.5	7	Seasonality	Low
0.19742222530969	0.196382797381741	5	0.5	7	Seasonality	Low
0.00740454844396984	-0.0036671023847249	5	0.5	7	Seasonality	Low
0.16424159561277	0.155245602657038	5	0.5	7	Seasonality	Low
0.302599595665431	0.309166616981235	5	0.5	7	Seasonality	Low
0.175428336325632	0.164623597913473	5	0.5	7	Seasonality	Low
0.309121403010088	0.310891151693092	5	0.5	7	Seasonality	Low
0.37096489451694	0.366373200807144	5	0.5	7	Seasonality	Low
0.164111613332546	0.155114690058935	5	0.5	7	Seasonality	Low
0.322034048269837	0.32392670993516	5	0.5	7	Seasonality	Low
0.368602680389085	0.372929115360153	5	0.5	7	Seasonality	Low
0.381906455754313	0.38201536813804	5	0.5	7	Seasonality	Low
0.0293579384836719	0.0126151076903412	5	0.5	7	Seasonality	Low
0.389670114139498	0.39574384241521	5	0.5	7	Seasonality	Low
0.15037120842556	0.155394759474451	5	0.5	7	Seasonality	Low
0.231744962852672	0.227002215104933	5	0.5	7	Seasonality	Low
0.387737491096592	0.388687212980944	5	0.5	7	Seasonality	Low
0.290908405192432	0.300268251617258	5	0.5	7	Seasonality	Low
0.314949109384068	0.306175641171659	5	0.5	7	Seasonality	Low
0.364645335861682	0.379761808376417	5	0.5	7	Seasonality	Low
0.0338414823593295	0.0712347924977553	5	0.5	7	Seasonality	Low
0.344303019936875	0.345091507528522	10	0.5	7	Seasonality	Low
0.352118669724661	0.341404871939486	10	0.5	7	Seasonality	Low
0.352310507225152	0.359619647754596	10	0.5	7	Seasonality	Low
0.350995179059925	0.348709238205906	10	0.5	7	Seasonality	Low
0.33077791031165	0.337020945675641	10	0.5	7	Seasonality	Low
0.313348810520841	0.310550344478009	10	0.5	7	Seasonality	Low
0.27536182386761	0.234617716442483	10	0.5	7	Seasonality	Low
0.317126865485489	0.318552137047561	10	0.5	7	Seasonality	Low
0.278531308987266	0.257845694578246	10	0.5	7	Seasonality	Low
0.335134091683429	0.326504138049137	10	0.5	7	Seasonality	Low
0.272539141306948	0.290533211812623	10	0.5	7	Seasonality	Low
0.167747796824697	0.18529984116648	10	0.5	7	Seasonality	Low
0.359976727154192	0.331456082973005	10	0.5	7	Seasonality	Low
0.204670843693947	0.223566367766045	10	0.5	7	Seasonality	Low
0.352310258844524	0.38444615304639	10	0.5	7	Seasonality	Low
0.314594332549404	0.336457717001945	10	0.5	7	Seasonality	Low
0.323202931474783	0.307408539830735	10	0.5	7	Seasonality	Low
0.321145341304719	0.329521926170493	10	0.5	7	Seasonality	Low
0.284732453056848	0.276824822969391	10	0.5	7	Seasonality	Low
0.236603184708158	0.251143305046307	10	0.5	7	Seasonality	Low
0.345640200798165	0.312741189694534	10	0.5	7	Seasonality	Low
0.337073316477783	0.318804092110169	10	0.5	7	Seasonality	Low
0.156022689041945	0.122172268392012	10	0.5	7	Seasonality	Low
0.356876707480198	0.358297926716544	10	0.5	7	Seasonality	Low
0.311325987237599	0.315364633707196	10	0.5	7	Seasonality	Low
0.374039265969941	0.343323416362151	10	0.5	7	Seasonality	Low
0.318714074691595	0.372904549273873	10	0.5	7	Seasonality	Low
0.340493242746985	0.336480358842825	10	0.5	7	Seasonality	Low
0.330316823935367	0.342108887017178	10	0.5	7	Seasonality	Low
0.0416872038730197	0.04752320044201	10	0.5	7	Seasonality	Low
0.268243234654261	0.230513040450237	10	0.5	7	Seasonality	Low
0.311877738764443	0.309039399117813	10	0.5	7	Seasonality	Low
0.049098428457024	0.050457693627571	10	0.5	7	Seasonality	Low
0.0703929286025023	0.0769930014122193	10	0.5	7	Seasonality	Low
0.342206023950906	0.346464317148011	10	0.5	7	Seasonality	Low
0.14509351763242	0.151053573045132	10	0.5	7	Seasonality	Low
0.000436089314657276	0.0615977523946497	10	0.5	7	Seasonality	Low
0.311429909033783	0.311913656917936	10	0.5	7	Seasonality	Low
0.213911329128644	0.236260845506435	10	0.5	7	Seasonality	Low
0.271589433845683	0.26448978130457	10	0.5	7	Seasonality	Low
0.254724461526289	0.265699652143311	10	0.5	7	Seasonality	Low
0.312102466465785	0.337156058256696	10	0.5	7	Seasonality	Low
0.137662655729885	0.130155659803846	10	0.5	7	Seasonality	Low
0.345614734317212	0.345681651438792	10	0.5	7	Seasonality	Low
0.163911418433252	0.155766698804439	10	0.5	7	Seasonality	Low
0.356453025967946	0.359515111858866	10	0.5	7	Seasonality	Low
0.352918331678538	0.334484772226538	10	0.5	7	Seasonality	Low
0.0397425238830809	0.023588632830692	10	0.5	7	Seasonality	Low
-0.000976979767827832	-0.0200912142266989	10	0.5	7	Seasonality	Low
0.183474897865585	0.0909629384477532	10	0.5	7	Seasonality	Low
0.16693821975029	0.117644434222539	10	0.5	7	Seasonality	Low
0.338273614117855	0.320489811149122	10	0.5	7	Seasonality	Low
0.169349133602946	0.187738767805702	10	0.5	7	Seasonality	Low
0.356429783043221	0.345488424074343	10	0.5	7	Seasonality	Low
0.224330341729852	0.23334506987316	10	0.5	7	Seasonality	Low
0.074371704469269	0.0874539129307589	10	0.5	7	Seasonality	Low
0.311193157342744	0.314964875254759	10	0.5	7	Seasonality	Low
0.0644114375673535	0.0479818586790325	10	0.5	7	Seasonality	Low
0.154506414685134	0.119889417440245	10	0.5	7	Seasonality	Low
0.28251815859921	0.278870231659572	10	0.5	7	Seasonality	Low
0.249874894353412	0.237188579969046	10	0.5	7	Seasonality	Low
0.268994170250304	0.269693820360292	10	0.5	7	Seasonality	Low
0.0500060736497509	0.0493287430214157	10	0.5	7	Seasonality	Low
0.329913395547348	0.29951294985606	10	0.5	7	Seasonality	Low
0.360177069308368	0.354729250113581	10	0.5	7	Seasonality	Low
0.35059224996309	0.351398892289546	10	0.5	7	Seasonality	Low
0.284938069250269	0.289543784641299	10	0.5	7	Seasonality	Low
0.102274726066007	0.135443644612639	10	0.5	7	Seasonality	Low
0.361847579081149	0.37120960783807	10	0.5	7	Seasonality	Low
0.308151207028187	0.261664660240494	10	0.5	7	Seasonality	Low
0.290549851492364	0.289696580543508	10	0.5	7	Seasonality	Low
0.302506881309172	0.30849658491731	10	0.5	7	Seasonality	Low
0.13320499220754	0.135802363529036	10	0.5	7	Seasonality	Low
0.17627757501465	0.191938716071257	10	0.5	7	Seasonality	Low
0.324982689006051	0.327852610425248	10	0.5	7	Seasonality	Low
0.32958812171381	0.353902736111864	10	0.5	7	Seasonality	Low
0.321607493799969	0.333490044716464	10	0.5	7	Seasonality	Low
0.332784971636593	0.324479218677533	10	0.5	7	Seasonality	Low
0.141165883410015	0.170560755312535	10	0.5	7	Seasonality	Low
0.32219138565672	0.332667636993704	10	0.5	7	Seasonality	Low
0.33788654881067	0.340441012208394	10	0.5	7	Seasonality	Low
0.344420267556744	0.358108928997438	10	0.5	7	Seasonality	Low
0.351381032200183	0.365768109394107	10	0.5	7	Seasonality	Low
0.305934974633262	0.299146246193592	10	0.5	7	Seasonality	Low
0.290140406359175	0.282103853919129	10	0.5	7	Seasonality	Low
0.249436848291041	0.249103364202801	500	0.5	7	Seasonality	Low
0.231331282750404	0.24005191788743	500	0.5	7	Seasonality	Low
0.20571712239156	0.219412804683641	500	0.5	7	Seasonality	Low
0.27197998070516	0.27792633014833	500	0.5	7	Seasonality	Low
0.212486746657297	0.207687613810265	500	0.5	7	Seasonality	Low
0.205645456912669	0.193310137632054	500	0.5	7	Seasonality	Low
0.131089768271772	0.124733441349125	500	0.5	7	Seasonality	Low
0.237990455959009	0.229262276743867	500	0.5	7	Seasonality	Low
0.202729119702967	0.196807222822407	500	0.5	7	Seasonality	Low
0.174392672055833	0.175703901089737	500	0.5	7	Seasonality	Low
0.190109294964582	0.172644703070022	500	0.5	7	Seasonality	Low
0.214238755263527	0.221724373841095	500	0.5	7	Seasonality	Low
0.0623301405646424	0.143716024346643	500	0.5	7	Seasonality	Low
0.203464981253072	0.191398630920313	500	0.5	7	Seasonality	Low
0.251977671912947	0.258084816644158	500	0.5	7	Seasonality	Low
0.18018129184753	0.1895702924841	500	0.5	7	Seasonality	Low
0.202453695696185	0.196016637415786	500	0.5	7	Seasonality	Low
0.0548818572078828	0.0517725050402086	500	0.5	7	Seasonality	Low
0.187878607634776	0.183628037629364	500	0.5	7	Seasonality	Low
0.185542063229328	0.17633192174384	500	0.5	7	Seasonality	Low
0.176205894995083	0.174336099769409	500	0.5	7	Seasonality	Low
0.211813413060332	0.226917833988424	500	0.5	7	Seasonality	Low
-0.00650480011862739	0.000967768084206344	500	0.5	7	Seasonality	Low
0.145928303627595	0.125089080234694	500	0.5	7	Seasonality	Low
-0.00273574697085197	-0.0107732071491905	500	0.5	7	Seasonality	Low
0.0807080843950085	0.0723839835525038	500	0.5	7	Seasonality	Low
0.000821877089024204	0.00260389267554292	500	0.5	7	Seasonality	Low
0.20851443564436	0.193539588028093	500	0.5	7	Seasonality	Low
0.158304290226856	0.146953064470039	500	0.5	7	Seasonality	Low
0.103388784066029	0.0805937212093897	500	0.5	7	Seasonality	Low
-0.0125630829560919	-0.0133366996447614	500	0.5	7	Seasonality	Low
0.136338745046447	0.120437543626373	500	0.5	7	Seasonality	Low
0.130083364984	0.135609448698934	500	0.5	7	Seasonality	Low
0.106640762700547	0.0826742911950774	500	0.5	7	Seasonality	Low
0.0419891178022912	0.0475476612199404	500	0.5	7	Seasonality	Low
-0.0210414912040089	-0.0203335779481715	500	0.5	7	Seasonality	Low
-0.0590058723337022	-0.0618064551348526	500	0.5	7	Seasonality	Low
0.00608307970894731	0.0157066331372778	500	0.5	7	Seasonality	Low
0.158663575574944	0.155429795580739	500	0.5	7	Seasonality	Low
0.0944944613762688	0.067474283397403	500	0.5	7	Seasonality	Low
0.0592517261283781	0.0585955857728405	500	0.5	7	Seasonality	Low
0.129369984653225	0.127357183927861	500	0.5	7	Seasonality	Low
-0.030130830618352	-0.0402990580068688	500	0.5	7	Seasonality	Low
0.216078616125974	0.225483864691362	500	0.5	7	Seasonality	Low
0.123279954533339	0.119689748665126	500	0.5	7	Seasonality	Low
0.19030939008901	0.149168621409525	500	0.5	7	Seasonality	Low
0.055426740849205	0.0698408945910538	500	0.5	7	Seasonality	Low
0.0348266253127022	0.0430176029981892	500	0.5	7	Seasonality	Low
0.139698896312056	0.182447303488394	500	0.5	7	Seasonality	Low
0.191933640130385	0.182811960594843	500	0.5	7	Seasonality	Low
0.0269641599617542	0.0342672568357565	500	0.5	7	Seasonality	Low
0.165480794606732	0.172191674548773	500	0.5	7	Seasonality	Low
0.0373487407473768	0.0417957578534952	500	0.5	7	Seasonality	Low
-0.0562725121922072	-0.0520001155139727	500	0.5	7	Seasonality	Low
0.0685111139041446	0.063488004217969	500	0.5	7	Seasonality	Low
-0.0650473588648963	-0.052938438849285	500	0.5	7	Seasonality	Low
0.229079531859401	0.212653559853409	500	0.5	7	Seasonality	Low
8.92547645770659e-06	0.00308271415988962	500	0.5	7	Seasonality	Low
0.0531042330319455	0.0473456924464894	500	0.5	7	Seasonality	Low
0.199104899800481	0.1650232405943	500	0.5	7	Seasonality	Low
0.0622021695210313	0.0657239156433086	500	0.5	7	Seasonality	Low
0.146346628061224	0.156278390196896	500	0.5	7	Seasonality	Low
0.139987487126968	0.14780063823664	500	0.5	7	Seasonality	Low
0.134426772055131	0.11672699545474	500	0.5	7	Seasonality	Low
0.021363546647255	0.0213859321812603	500	0.5	7	Seasonality	Low
0.0893102582967502	0.0872145749091433	500	0.5	7	Seasonality	Low
-0.030876070848155	-0.0260020222943396	500	0.5	7	Seasonality	Low
0.198426593809008	0.169156229551091	500	0.5	7	Seasonality	Low
0.0208075013151056	0.0270610414996147	500	0.5	7	Seasonality	Low
0.035024716126138	0.0649945515333482	500	0.5	7	Seasonality	Low
0.205232756468531	0.194480023258815	500	0.5	7	Seasonality	Low
0.000388369004803782	0.00845411024042228	500	0.5	7	Seasonality	Low
0.0194112326107369	0.0212280581960033	500	0.5	7	Seasonality	Low
0.19416605596328	0.207701807044112	500	0.5	7	Seasonality	Low
-0.0259478928362706	-0.0194597343399246	500	0.5	7	Seasonality	Low
0.0558845956227015	0.0588511228629452	500	0.5	7	Seasonality	Low
0.128229775017896	0.115619676819641	500	0.5	7	Seasonality	Low
0.253501589425511	0.227620179131873	500	0.5	7	Seasonality	Low
0.210773921139072	0.210399286918956	500	0.5	7	Seasonality	Low
0.00683140335469911	0.0244938081800088	500	0.5	7	Seasonality	Low
0.217574584262535	0.224141892470134	500	0.5	7	Seasonality	Low
-0.0609165570885682	-0.0593971767688829	500	0.5	7	Seasonality	Low
0.107563983212389	0.113886939358937	500	0.5	7	Seasonality	Low
-0.0419601522347293	-0.0444224006599357	500	0.5	7	Seasonality	Low
0.0856171999648101	0.101907682061179	500	0.5	7	Seasonality	Low
0.0280924177153322	0.0343466419111944	500	0.5	7	Seasonality	Low
0.232755904701859	0.237116801201	500	0.5	7	Seasonality	Low
-0.0187400337263709	-0.029885758883149	500	0.5	7	Seasonality	Low
0.12365443461218	0.121984196368637	500	0.5	7	Seasonality	Low
0.105053990242978	0.0950020331758292	500	0.5	7	Seasonality	Low
0.174545694025248	0.153446023215529	500	0.5	7	Seasonality	Low
0.0349130137109224	0.0522469735328666	500	0.5	7	Seasonality	Low
0.109208796317316	0.116531347806276	500	0.5	7	Seasonality	Low
-0.0403908963682147	-0.0362582058504783	500	0.5	7	Seasonality	Low
-0.0574696000975562	-0.0693665696361533	500	0.5	7	Seasonality	Low
0.0176669143861586	0.0230585361459298	500	0.5	7	Seasonality	Low
0.0274154384955924	0.0229890922577527	500	0.5	7	Seasonality	Low
0.0435907205289101	0.0499442845193991	500	0.5	7	Seasonality	Low
0.00149932614106004	-0.00626406813079242	500	0.5	7	Seasonality	Low
0.217790459078728	0.223461099665725	500	0.5	7	Seasonality	Low
0.0838367137424179	0.0871558857629794	500	0.5	7	Seasonality	Low
0.0118716020521615	0.00451636796850388	500	0.5	7	Seasonality	Low
0.0156650190184601	0.020167503272991	500	0.5	7	Seasonality	Low
0.14976169616212	0.147295245759286	500	0.5	7	Seasonality	Low
0.0574759089230615	0.0426622422554143	500	0.5	7	Seasonality	Low
0.214138144946507	0.215149616008869	5	0.5	7	Seasonality	High
0.121182619640583	0.161685870717878	5	0.5	7	Seasonality	High
0.0555747644653454	0.0891943359306545	5	0.5	7	Seasonality	High
0.190110480087266	0.205975164078596	5	0.5	7	Seasonality	High
0.382416673837638	0.36065752695254	5	0.5	7	Seasonality	High
0.361884853304711	0.338442449923931	5	0.5	7	Seasonality	High
0.301389316819699	0.311216600137369	5	0.5	7	Seasonality	High
0.252948036687994	0.238721891520938	5	0.5	7	Seasonality	High
0.0378408336567878	0.109233452062995	5	0.5	7	Seasonality	High
0.0217913953335858	0.0230438016227384	5	0.5	7	Seasonality	High
0.382231116754101	0.350543715122843	5	0.5	7	Seasonality	High
0.315917553902676	0.292940278645326	5	0.5	7	Seasonality	High
0.0521832269069979	0.0399886614328145	5	0.5	7	Seasonality	High
0.122487888482073	0.128291830896901	5	0.5	7	Seasonality	High
0.355391089898706	0.332554905595285	5	0.5	7	Seasonality	High
0.363774706690972	0.364865980279192	5	0.5	7	Seasonality	High
0.259964153995795	0.219529797022555	5	0.5	7	Seasonality	High
0.342236149154085	0.304619049682098	5	0.5	7	Seasonality	High
-0.0308692232964419	-0.051654949938261	5	0.5	7	Seasonality	High
0.39500462430047	0.379458653197865	5	0.5	7	Seasonality	High
0.271188747770954	0.314054262743236	5	0.5	7	Seasonality	High
0.227910412343637	0.229407360416531	5	0.5	7	Seasonality	High
0.063734504583549	0.0800851388067842	5	0.5	7	Seasonality	High
0.381884273149847	0.330195805685914	5	0.5	7	Seasonality	High
0.367775089028876	0.364632115531744	5	0.5	7	Seasonality	High
0.388604723335298	0.341701256301569	5	0.5	7	Seasonality	High
0.110466706732916	0.143301300524353	5	0.5	7	Seasonality	High
0.262289436946585	0.266050047041012	5	0.5	7	Seasonality	High
0.396856709710599	0.371049535779146	5	0.5	7	Seasonality	High
0.180087126053176	0.184533644922844	5	0.5	7	Seasonality	High
-0.0390858754700604	-0.0301519819593134	5	0.5	7	Seasonality	High
-0.0147972112221533	-0.00599845842441585	5	0.5	7	Seasonality	High
0.00044554173671959	0.0212423178995501	5	0.5	7	Seasonality	High
-0.0196008204594638	0.0193937557023608	5	0.5	7	Seasonality	High
0.00686076654868339	0.00224772043088839	5	0.5	7	Seasonality	High
-0.0168442919226766	-0.0221773650295356	5	0.5	7	Seasonality	High
0.00900460704315528	0.00896659269390435	5	0.5	7	Seasonality	High
-0.00448198767319078	0.012429256797078	5	0.5	7	Seasonality	High
-0.00779891819783073	-0.00156698652186146	5	0.5	7	Seasonality	High
0.0306707236695828	0.0597422992600674	5	0.5	7	Seasonality	High
-0.00386245768333033	0.0188662808361404	5	0.5	7	Seasonality	High
-0.00248168327545503	0.00508720353413622	5	0.5	7	Seasonality	High
-0.00117394443555538	0.0105607966404621	5	0.5	7	Seasonality	High
-0.0318866237335937	-0.0313009859723928	5	0.5	7	Seasonality	High
-0.00531404490742436	0.011643496823155	5	0.5	7	Seasonality	High
0.0597647072893487	0.079871562526919	10	0.5	7	Seasonality	High
0.178024471133774	0.18593050504409	10	0.5	7	Seasonality	High
0.125193017654585	0.121030269966035	10	0.5	7	Seasonality	High
0.326924025373988	0.295963868200007	10	0.5	7	Seasonality	High
-0.0200467596054451	-0.0124201530826273	10	0.5	7	Seasonality	High
-0.0171767482043126	-0.0420079007538893	10	0.5	7	Seasonality	High
0.283898677952423	0.251558856106655	10	0.5	7	Seasonality	High
0.228351850212821	0.244903957676795	10	0.5	7	Seasonality	High
-0.0148222953373609	-0.0491539118562449	10	0.5	7	Seasonality	High
0.042735353621915	0.04990950781815	10	0.5	7	Seasonality	High
0.289030297652936	0.270634015038965	10	0.5	7	Seasonality	High
0.011716117520792	0.0184940008465604	10	0.5	7	Seasonality	High
0.0902528286425229	0.0862147647365374	10	0.5	7	Seasonality	High
0.301590651222499	0.307562652249919	10	0.5	7	Seasonality	High
0.169389526537466	0.157184049117346	10	0.5	7	Seasonality	High
-0.0180130516486866	-0.050011190838857	10	0.5	7	Seasonality	High
0.306408018049927	0.301675128668079	10	0.5	7	Seasonality	High
0.23658564248276	0.237525193135321	10	0.5	7	Seasonality	High
0.0099984709956473	0.0141500656014222	10	0.5	7	Seasonality	High
-0.0341992429861496	0.00751249954188077	10	0.5	7	Seasonality	High
-0.0417761915665972	-0.0128511151903815	10	0.5	7	Seasonality	High
0.28390975792687	0.254584292115842	10	0.5	7	Seasonality	High
0.281099043215434	0.26843932587847	10	0.5	7	Seasonality	High
0.37322077571069	0.302150032285149	10	0.5	7	Seasonality	High
0.338618059904691	0.347891673343283	10	0.5	7	Seasonality	High
0.29484475713754	0.284347369190867	10	0.5	7	Seasonality	High
0.268214575592208	0.278376524420846	10	0.5	7	Seasonality	High
0.310778018459924	0.299625517867665	10	0.5	7	Seasonality	High
0.0745061070894845	0.0777693167828057	10	0.5	7	Seasonality	High
0.199751359494229	0.188188435741281	10	0.5	7	Seasonality	High
0.198857250854859	0.196860817571899	500	0.5	7	Seasonality	High
0.0430370205797683	0.0639067193146073	500	0.5	7	Seasonality	High
0.188075360619861	0.200844800621047	500	0.5	7	Seasonality	High
0.184221021724081	0.17845331979349	500	0.5	7	Seasonality	High
0.0074670933569309	0.0195400836554381	500	0.5	7	Seasonality	High
-0.0658987868162661	-0.0791718108946543	500	0.5	7	Seasonality	High
-0.00619776429667195	-0.0122536581740223	500	0.5	7	Seasonality	High
0.236663670628945	0.231801692291183	500	0.5	7	Seasonality	High
0.174677818271712	0.171026124831093	500	0.5	7	Seasonality	High
0.170036827105868	0.169964143628995	500	0.5	7	Seasonality	High
-0.0589732653448593	-0.0400930163474124	500	0.5	7	Seasonality	High
-0.0162371114143877	-0.0357064061614738	500	0.5	7	Seasonality	High
-0.0207777450499761	-0.0416290927871924	500	0.5	7	Seasonality	High
0.230277797697581	0.23377997493912	500	0.5	7	Seasonality	High
0.0143347584271473	0.0190333764931093	500	0.5	7	Seasonality	High
0.153195215745466	0.170510610468954	500	0.5	7	Seasonality	High
0.216602279878883	0.204390787294379	500	0.5	7	Seasonality	High
0.175639284110643	0.148331318307679	500	0.5	7	Seasonality	High
0.11330517366747	0.115095596133209	500	0.5	7	Seasonality	High
0.171881672429872	0.177199122269791	500	0.5	7	Seasonality	High
0.170623759229345	0.150431665563367	500	0.5	7	Seasonality	High
0.150364557782529	0.141735512731442	500	0.5	7	Seasonality	High
-0.00996471291061355	-0.0385754831362639	500	0.5	7	Seasonality	High
0.219992676721295	0.228629611273336	500	0.5	7	Seasonality	High
-0.0740314754547711	-0.0821382766311288	500	0.5	7	Seasonality	High
0.212718962801411	0.198826132068371	500	0.5	7	Seasonality	High
0.207534911546248	0.20477164417833	500	0.5	7	Seasonality	High
0.227354542651526	0.238974315171553	500	0.5	7	Seasonality	High
0.0532848851997574	0.0558252064941295	500	0.5	7	Seasonality	High
0.231933543340409	0.234105375088436	500	0.5	7	Seasonality	High
0.171232600432811	0.174411646110879	500	0.5	7	Seasonality	High
0.128104929661289	0.114910722267644	500	0.5	7	Seasonality	High
-0.0722700524544906	-0.0658872452333646	500	0.5	7	Seasonality	High
-0.0660483159063785	-0.0626301054340727	500	0.5	7	Seasonality	High
-0.0792960308991823	-0.0735857732582186	500	0.5	7	Seasonality	High
-0.0133494190175147	-0.0402864235160671	500	0.5	7	Seasonality	High
-0.0866423448721088	-0.0720009325686449	500	0.5	7	Seasonality	High
-0.037982151750693	-0.0359901867628672	500	0.5	7	Seasonality	High
-0.00671946484914457	-0.00426998364773565	500	0.5	7	Seasonality	High
-0.0532098742495665	-0.0523929320766671	500	0.5	7	Seasonality	High
-0.0243683064860838	-0.0279041044747899	500	0.5	7	Seasonality	High
-0.00627125239589126	-0.00657077117918786	500	0.5	7	Seasonality	High
-0.0813794032322174	-0.0800642439786223	500	0.5	7	Seasonality	High
0.0191789010947836	-0.00626320197555805	500	0.5	7	Seasonality	High
-0.0357314770111056	-0.0422660257166381	500	0.5	7	Seasonality	High
-0.0597311381015351	-0.0602021129975627	500	0.5	7	Seasonality	High
-0.0513001568525702	-0.0484749662393742	500	0.5	7	Seasonality	High
-0.0758263347736099	-0.0791183476815813	500	0.5	7	Seasonality	High
-0.0800677933112797	-0.07488648842729	500	0.5	7	Seasonality	High
-0.00976444530017882	-0.00719370689102891	500	0.5	7	Seasonality	High
-0.0718531095062151	-0.0714952229911232	500	0.5	7	Seasonality	High
-0.0242470745976139	-0.023307095134748	500	0.5	7	Seasonality	High
-0.0854638308323202	-0.0790009847358229	500	0.5	7	Seasonality	High
-0.0723673042898389	-0.0749177299998663	500	0.5	7	Seasonality	High
-0.0504391818567787	-0.0504851367201141	500	0.5	7	Seasonality	High
-0.0385230339347663	-0.0355436647593067	500	0.5	7	Seasonality	High
-0.00814082249232896	0.00052569292857943	500	0.5	7	Seasonality	High
-0.0319517226072357	-0.0368131655537878	500	0.5	7	Seasonality	High
-0.0178274622486436	-0.0196208666099484	500	0.5	7	Seasonality	High
-0.0147198228985047	-0.015855176710714	500	0.5	7	Seasonality	High
-0.0212156889633222	-0.0225487249958493	500	0.5	7	Seasonality	High
-0.0763626324467702	-0.0759269067602472	500	0.5	7	Seasonality	High
-0.0591029684592827	-0.0631081143798632	500	0.5	7	Seasonality	High
-0.0332484364380332	-0.0233797510728504	500	0.5	7	Seasonality	High
-0.0639918829555509	-0.0615678975137169	500	0.5	7	Seasonality	High
0.417382873867097	0.413063231630392	5	0.5	18	No seasonality	Low
0.121348317689287	0.140907386854915	5	0.5	18	No seasonality	Low
0.424700109362684	0.450298128772114	5	0.5	18	No seasonality	Low
0.299532848231622	0.318508794794444	5	0.5	18	No seasonality	Low
0.319789966502265	0.31509215832828	5	0.5	18	No seasonality	Low
0.377460818862813	0.385908168616866	5	0.5	18	No seasonality	Low
0.295352179827348	0.302925388154312	5	0.5	18	No seasonality	Low
0.177250295983843	0.237015266881678	5	0.5	18	No seasonality	Low
0.354395393302425	0.374624507086463	5	0.5	18	No seasonality	Low
0.178322941337823	0.189527155447424	5	0.5	18	No seasonality	Low
0.327350714961158	0.328070956185677	5	0.5	18	No seasonality	Low
0.261445833035718	0.273599966547129	5	0.5	18	No seasonality	Low
0.367107715240062	0.36287413624666	5	0.5	18	No seasonality	Low
0.372050713195255	0.370897896186773	5	0.5	18	No seasonality	Low
0.256251644128343	0.268823180290016	5	0.5	18	No seasonality	Low
0.197466225235812	0.229003346505297	5	0.5	18	No seasonality	Low
0.420027298353918	0.439974721912952	5	0.5	18	No seasonality	Low
0.370645615644709	0.384699401770406	5	0.5	18	No seasonality	Low
0.315811497813491	0.306098281474307	5	0.5	18	No seasonality	Low
0.372339924507165	0.375222638907234	5	0.5	18	No seasonality	Low
0.310369895901108	0.31385442532697	5	0.5	18	No seasonality	Low
0.310928928557871	0.316985811520499	5	0.5	18	No seasonality	Low
0.346557591547657	0.350098315823384	5	0.5	18	No seasonality	Low
0.248200245598921	0.242927537832821	5	0.5	18	No seasonality	Low
0.245984291908169	0.21683326465438	5	0.5	18	No seasonality	Low
0.364888000110096	0.391266558004947	5	0.5	18	No seasonality	Low
0.376299851145221	0.393414130359261	5	0.5	18	No seasonality	Low
0.194836434991057	0.238187890414166	5	0.5	18	No seasonality	Low
0.286025310072185	0.288407099619923	5	0.5	18	No seasonality	Low
0.364113998730714	0.357216055658349	5	0.5	18	No seasonality	Low
0.227045462307691	0.209499604519866	5	0.5	18	No seasonality	Low
0.350749855620958	0.372529852206914	5	0.5	18	No seasonality	Low
0.422110157672895	0.419747545708174	5	0.5	18	No seasonality	Low
0.323624093938282	0.321202762094831	5	0.5	18	No seasonality	Low
0.0760811714488224	0.0897276806265281	5	0.5	18	No seasonality	Low
0.155212672682673	0.162474640446344	5	0.5	18	No seasonality	Low
0.00681728880415075	0.0483091200180641	5	0.5	18	No seasonality	Low
0.091401925684573	0.0971337232269699	5	0.5	18	No seasonality	Low
0.129561479482492	0.156464811236245	5	0.5	18	No seasonality	Low
0.304268085866752	0.317732981221264	5	0.5	18	No seasonality	Low
0.0916390939812348	0.12037127156248	5	0.5	18	No seasonality	Low
0.0741458549498428	0.0841383673137474	5	0.5	18	No seasonality	Low
0.11869191061218	0.10627246135977	5	0.5	18	No seasonality	Low
0.265727997053562	0.25848672249343	5	0.5	18	No seasonality	Low
0.107093034448134	0.0803905403596155	5	0.5	18	No seasonality	Low
0.150964142351876	0.162420118364303	5	0.5	18	No seasonality	Low
0.235146475625915	0.237270978006714	5	0.5	18	No seasonality	Low
0.214682245536865	0.202047667907643	5	0.5	18	No seasonality	Low
0.259961987639266	0.252285297552034	5	0.5	18	No seasonality	Low
0.180864502297978	0.161126238529395	5	0.5	18	No seasonality	Low
0.282367326098792	0.278743019485061	5	0.5	18	No seasonality	Low
0.217767534698616	0.201533693367098	5	0.5	18	No seasonality	Low
0.231692192640476	0.232175634597184	5	0.5	18	No seasonality	Low
0.298515699230295	0.28283670161829	5	0.5	18	No seasonality	Low
0.0315577580193432	0.0209666240314615	5	0.5	18	No seasonality	Low
0.313244037587675	0.317748858267692	5	0.5	18	No seasonality	Low
0.329421701532767	0.323181719211166	5	0.5	18	No seasonality	Low
0.295572924070214	0.30603280197468	5	0.5	18	No seasonality	Low
0.363536726149153	0.363159655125688	5	0.5	18	No seasonality	Low
0.104516021255563	0.11772068692031	5	0.5	18	No seasonality	Low
0.328320023519312	0.318017506466982	5	0.5	18	No seasonality	Low
0.08110993140225	0.133478546299427	5	0.5	18	No seasonality	Low
0.256705857942402	0.259138921055464	5	0.5	18	No seasonality	Low
0.239538391541862	0.234375613786318	5	0.5	18	No seasonality	Low
0.320527679394212	0.306768376064863	5	0.5	18	No seasonality	Low
0.409194514094835	0.402136282298024	5	0.5	18	No seasonality	Low
0.0254891960796193	0.0242270738278301	5	0.5	18	No seasonality	Low
0.192031891078735	0.209404557427224	5	0.5	18	No seasonality	Low
0.271211110946421	0.25949112041011	5	0.5	18	No seasonality	Low
0.346929639364394	0.346432982239279	5	0.5	18	No seasonality	Low
0.277516221526952	0.279281508752106	5	0.5	18	No seasonality	Low
-0.00183690079503306	0.0103152964189518	5	0.5	18	No seasonality	Low
0.145848911450263	0.16004923152	5	0.5	18	No seasonality	Low
0.178913621819152	0.204481207568013	5	0.5	18	No seasonality	Low
0.0841969882883817	0.0910879645861751	5	0.5	18	No seasonality	Low
0.382510263660192	0.375994275787023	5	0.5	18	No seasonality	Low
0.0877029702082113	0.0846511162902935	5	0.5	18	No seasonality	Low
0.0930845292208471	0.0857728677195312	5	0.5	18	No seasonality	Low
0.105078219111605	0.0832017865392771	5	0.5	18	No seasonality	Low
0.263638156143042	0.274799053909844	5	0.5	18	No seasonality	Low
0.389717520649276	0.382192055415194	5	0.5	18	No seasonality	Low
0.332882478301014	0.322611857715326	5	0.5	18	No seasonality	Low
0.39622088831378	0.394832100002738	5	0.5	18	No seasonality	Low
0.15088124597498	0.166338645949874	5	0.5	18	No seasonality	Low
0.337388697336189	0.330705392619405	5	0.5	18	No seasonality	Low
0.111992242635099	0.157255615717045	10	0.5	18	No seasonality	Low
0.30975624950102	0.304850768539263	10	0.5	18	No seasonality	Low
0.178945614041556	0.159060611696986	10	0.5	18	No seasonality	Low
0.310970784997511	0.327098467467144	10	0.5	18	No seasonality	Low
0.175343712968379	0.168023897389576	10	0.5	18	No seasonality	Low
0.268324796795566	0.269979463401688	10	0.5	18	No seasonality	Low
0.301028572292196	0.314490009311703	10	0.5	18	No seasonality	Low
0.288783422513422	0.287193908298385	10	0.5	18	No seasonality	Low
0.295709987359956	0.290072712843094	10	0.5	18	No seasonality	Low
0.141659274033124	0.141396746363541	10	0.5	18	No seasonality	Low
0.30237637207477	0.309952836067064	10	0.5	18	No seasonality	Low
0.15900282314841	0.164495665034549	10	0.5	18	No seasonality	Low
0.243656347763596	0.254567364275819	10	0.5	18	No seasonality	Low
0.319412107402079	0.315782918696372	10	0.5	18	No seasonality	Low
0.124791456389905	0.122000596121301	10	0.5	18	No seasonality	Low
0.179782436296708	0.177936794676366	10	0.5	18	No seasonality	Low
0.328547562684265	0.332349289762755	10	0.5	18	No seasonality	Low
0.188804721770336	0.171231842986015	10	0.5	18	No seasonality	Low
0.147124175264365	0.155435140926399	10	0.5	18	No seasonality	Low
0.260464121495304	0.257399933724711	10	0.5	18	No seasonality	Low
0.305925079230879	0.30256238259278	10	0.5	18	No seasonality	Low
0.344096977728075	0.337322172700864	10	0.5	18	No seasonality	Low
0.357741253908861	0.359280302627829	10	0.5	18	No seasonality	Low
0.320042183560993	0.31662856927934	10	0.5	18	No seasonality	Low
0.311324953363425	0.316574218846302	10	0.5	18	No seasonality	Low
0.331171787186881	0.336806984792496	10	0.5	18	No seasonality	Low
0.312754674927758	0.314645946341205	10	0.5	18	No seasonality	Low
0.175096082062723	0.199042462872562	10	0.5	18	No seasonality	Low
0.229234008907004	0.239983825699834	10	0.5	18	No seasonality	Low
0.359986305491861	0.361595168133862	10	0.5	18	No seasonality	Low
0.303314795114736	0.297205538547759	10	0.5	18	No seasonality	Low
0.289102332270024	0.284656126391233	10	0.5	18	No seasonality	Low
0.176046149649392	0.183207286723733	10	0.5	18	No seasonality	Low
0.207285929446773	0.216877172055773	10	0.5	18	No seasonality	Low
0.158229338300303	0.148100144410509	10	0.5	18	No seasonality	Low
0.182510109145711	0.173282864496277	10	0.5	18	No seasonality	Low
0.141879564228471	0.160458306667948	10	0.5	18	No seasonality	Low
0.289775244014792	0.281260441379584	10	0.5	18	No seasonality	Low
0.0500541285841606	0.0343639350930871	10	0.5	18	No seasonality	Low
0.139593164143562	0.131293558144561	10	0.5	18	No seasonality	Low
0.171163956962707	0.151884432805961	10	0.5	18	No seasonality	Low
0.194812953443919	0.196719344559499	10	0.5	18	No seasonality	Low
0.214109359087957	0.18422403200994	10	0.5	18	No seasonality	Low
0.235778574160714	0.231421214619225	10	0.5	18	No seasonality	Low
0.079065009959702	0.0822700385357738	10	0.5	18	No seasonality	Low
0.0827289060566842	0.0945738342216611	10	0.5	18	No seasonality	Low
0.311105766812697	0.318827627080869	10	0.5	18	No seasonality	Low
0.115786001445533	0.111783455453264	10	0.5	18	No seasonality	Low
0.0976299278347183	0.125380476210365	10	0.5	18	No seasonality	Low
0.218013634942944	0.220594507265786	10	0.5	18	No seasonality	Low
0.189963032000193	0.206964341026309	10	0.5	18	No seasonality	Low
0.333866904765869	0.320055224772305	10	0.5	18	No seasonality	Low
0.0369716872032649	0.033623925078021	10	0.5	18	No seasonality	Low
0.335097944516262	0.325759606407156	10	0.5	18	No seasonality	Low
0.125127585021535	0.13455055910369	10	0.5	18	No seasonality	Low
0.191331447670196	0.210578026439914	10	0.5	18	No seasonality	Low
0.0279769208116918	-0.00943695654429494	10	0.5	18	No seasonality	Low
0.233345426139981	0.219102546289527	10	0.5	18	No seasonality	Low
0.333989610702722	0.317886859430825	10	0.5	18	No seasonality	Low
-0.028332094146352	-0.0333308087631699	10	0.5	18	No seasonality	Low
0.191386486672912	0.17850632007866	10	0.5	18	No seasonality	Low
0.249941066585137	0.25544902106402	10	0.5	18	No seasonality	Low
0.0773698417540314	0.0727650498121958	10	0.5	18	No seasonality	Low
0.131542638518028	0.146438274696769	10	0.5	18	No seasonality	Low
0.129689371828715	0.127198883014257	10	0.5	18	No seasonality	Low
0.208210236535592	0.202802385018424	10	0.5	18	No seasonality	Low
0.186172881992254	0.1878498579549	10	0.5	18	No seasonality	Low
0.279809192451159	0.249936921073504	10	0.5	18	No seasonality	Low
0.325369572991103	0.314156821151589	10	0.5	18	No seasonality	Low
0.28717751560547	0.295724215465672	10	0.5	18	No seasonality	Low
0.20371177183251	0.218816548815845	10	0.5	18	No seasonality	Low
0.120971050169134	0.121529182166229	10	0.5	18	No seasonality	Low
0.18452049353244	0.185742568635927	10	0.5	18	No seasonality	Low
0.170404758377795	0.160457640311685	10	0.5	18	No seasonality	Low
0.118430197512992	0.139363984874437	10	0.5	18	No seasonality	Low
0.224233461797188	0.249047723747074	10	0.5	18	No seasonality	Low
0.0612534758204918	0.052304983022638	10	0.5	18	No seasonality	Low
0.122705450450333	0.10458889301693	10	0.5	18	No seasonality	Low
0.130843108301919	0.1322934719382	10	0.5	18	No seasonality	Low
0.16637765680846	0.154424857282498	10	0.5	18	No seasonality	Low
0.265640872485207	0.278917977928855	10	0.5	18	No seasonality	Low
0.281523097946207	0.28667617121655	10	0.5	18	No seasonality	Low
0.179813854665502	0.219547065340292	10	0.5	18	No seasonality	Low
0.198102838607287	0.192413439528697	10	0.5	18	No seasonality	Low
0.153843209378077	0.147305699340595	10	0.5	18	No seasonality	Low
0.18109689532781	0.197466226934304	10	0.5	18	No seasonality	Low
0.0236127024791261	0.0297818204428257	10	0.5	18	No seasonality	Low
0.223324121339328	0.21884017047524	10	0.5	18	No seasonality	Low
0.202604964111888	0.208662604300962	10	0.5	18	No seasonality	Low
-0.0134917851589553	-0.00905536475929231	10	0.5	18	No seasonality	Low
0.0378072894715603	0.022354149388125	10	0.5	18	No seasonality	Low
0.2539828550394	0.256175723234195	10	0.5	18	No seasonality	Low
0.220730795015414	0.237060214461442	10	0.5	18	No seasonality	Low
0.0303274107529877	0.0395205165474539	10	0.5	18	No seasonality	Low
0.120253168134966	0.128216412909276	10	0.5	18	No seasonality	Low
0.248664059629623	0.263987738180634	10	0.5	18	No seasonality	Low
0.347221488014488	0.333369488586894	10	0.5	18	No seasonality	Low
0.256241675701013	0.25807534737495	10	0.5	18	No seasonality	Low
0.230333631654081	0.238284967173366	10	0.5	18	No seasonality	Low
0.190936956445808	0.198497448684367	10	0.5	18	No seasonality	Low
0.205609408943725	0.204359582156021	10	0.5	18	No seasonality	Low
0.249763825084966	0.273274443628334	10	0.5	18	No seasonality	Low
0.312709192898904	0.30185422193863	10	0.5	18	No seasonality	Low
0.129538746747401	0.126781404978187	10	0.5	18	No seasonality	Low
0.316640166407564	0.284502927340812	10	0.5	18	No seasonality	Low
0.181503509046177	0.17003820478336	500	0.5	18	No seasonality	Low
0.187109615171477	0.19132083571663	500	0.5	18	No seasonality	Low
0.249098781075796	0.204235935488451	500	0.5	18	No seasonality	Low
0.249942540824073	0.241738439247224	500	0.5	18	No seasonality	Low
0.202510014444347	0.199615111566033	500	0.5	18	No seasonality	Low
0.211681547058513	0.185228087296854	500	0.5	18	No seasonality	Low
0.231537509998809	0.202160052548526	500	0.5	18	No seasonality	Low
0.248225819876748	0.259327221054945	500	0.5	18	No seasonality	Low
0.225359075409156	0.202226327601734	500	0.5	18	No seasonality	Low
0.312923117909834	0.32284043298223	500	0.5	18	No seasonality	Low
0.258933673742585	0.239905091654857	500	0.5	18	No seasonality	Low
0.156659322367799	0.146794516681909	500	0.5	18	No seasonality	Low
0.211658707397928	0.215330508203844	500	0.5	18	No seasonality	Low
0.154385019100474	0.16557076958012	500	0.5	18	No seasonality	Low
0.193628101010153	0.18845708905314	500	0.5	18	No seasonality	Low
0.163200290941968	0.170617749773201	500	0.5	18	No seasonality	Low
0.163663560825322	0.174933049355072	500	0.5	18	No seasonality	Low
0.226540835313072	0.235783987613224	500	0.5	18	No seasonality	Low
0.168377970084736	0.171727865535199	500	0.5	18	No seasonality	Low
0.193005085792258	0.18575110019747	500	0.5	18	No seasonality	Low
0.318385268364588	0.301130141532463	500	0.5	18	No seasonality	Low
0.238758032002273	0.23624483480202	500	0.5	18	No seasonality	Low
0.15014062408999	0.15988195694582	500	0.5	18	No seasonality	Low
0.0930656331780927	0.0953912825695804	500	0.5	18	No seasonality	Low
0.161845997976249	0.139421994184373	500	0.5	18	No seasonality	Low
0.190707043424737	0.192525886827837	500	0.5	18	No seasonality	Low
0.201060039626598	0.186701791745533	500	0.5	18	No seasonality	Low
0.182797690977695	0.189674949654628	500	0.5	18	No seasonality	Low
0.00558498027816841	0.00352670759014075	500	0.5	18	No seasonality	Low
0.00275927727132714	-0.0017504482822817	500	0.5	18	No seasonality	Low
0.0844874976650378	0.0833734440332073	500	0.5	18	No seasonality	Low
-0.0685883512633556	-0.065949811286726	500	0.5	18	No seasonality	Low
0.0467830239433068	0.0577075587951061	500	0.5	18	No seasonality	Low
0.13818744694146	0.140257122971585	500	0.5	18	No seasonality	Low
0.200154189259989	0.19362601439294	500	0.5	18	No seasonality	Low
0.0265133479787842	0.0241394284061471	500	0.5	18	No seasonality	Low
0.00764773124674378	0.0197490783383779	500	0.5	18	No seasonality	Low
-0.0842756547362324	-0.0774385315762294	500	0.5	18	No seasonality	Low
0.0305366299393259	0.0328149138506485	500	0.5	18	No seasonality	Low
0.172606418025564	0.172266204061726	500	0.5	18	No seasonality	Low
0.0484217325330625	0.0509265323745498	500	0.5	18	No seasonality	Low
0.0543915226134981	0.0573909596720639	500	0.5	18	No seasonality	Low
0.224475978948595	0.225370070203	500	0.5	18	No seasonality	Low
0.0755809307286827	0.0805874075989019	500	0.5	18	No seasonality	Low
-0.0740907725824623	-0.0731134856137166	500	0.5	18	No seasonality	Low
0.183879261584207	0.229075821485399	500	0.5	18	No seasonality	Low
0.121945008192673	0.136243140908741	500	0.5	18	No seasonality	Low
0.109660243280825	0.10503735955593	500	0.5	18	No seasonality	Low
0.0391375166783357	0.0343692489614606	500	0.5	18	No seasonality	Low
0.190978682695099	0.212342128202405	500	0.5	18	No seasonality	Low
0.14702267117829	0.147045804035181	500	0.5	18	No seasonality	Low
-0.000478105390830026	-0.007847876157161	500	0.5	18	No seasonality	Low
0.0130799972931115	0.0149644609534197	500	0.5	18	No seasonality	Low
0.0900070007059328	0.0843040840439444	500	0.5	18	No seasonality	Low
0.135582927534895	0.120486872057652	500	0.5	18	No seasonality	Low
-0.0246649300857348	-0.0198519259464849	500	0.5	18	No seasonality	Low
-0.013299583671421	0.00142297331461504	500	0.5	18	No seasonality	Low
0.00573680109473244	0.0117126889163123	500	0.5	18	No seasonality	Low
0.249119027535845	0.253554306451179	500	0.5	18	No seasonality	Low
0.125404219052958	0.135955429437153	500	0.5	18	No seasonality	Low
0.0618897872433498	0.057719591013016	500	0.5	18	No seasonality	Low
0.230083470167789	0.198801559704663	500	0.5	18	No seasonality	Low
0.132794472550411	0.13524877046973	500	0.5	18	No seasonality	Low
-0.0250458068844747	0.00162772228319473	500	0.5	18	No seasonality	Low
0.138245029690047	0.144682000084198	500	0.5	18	No seasonality	Low
0.16077487097013	0.165395915856089	500	0.5	18	No seasonality	Low
-0.0518266100029607	-0.0550565846748195	500	0.5	18	No seasonality	Low
0.0532456902437532	0.0527356767214407	500	0.5	18	No seasonality	Low
-0.015958355985316	-0.0065539034884813	500	0.5	18	No seasonality	Low
0.185848330357555	0.185246960598031	500	0.5	18	No seasonality	Low
0.0271067194401935	0.0253387378567634	500	0.5	18	No seasonality	Low
0.142128909461004	0.139115037759222	500	0.5	18	No seasonality	Low
0.152142938778159	0.152583582591294	500	0.5	18	No seasonality	Low
-0.0728699702385694	-0.0800214642316692	500	0.5	18	No seasonality	Low
0.0374874429633084	0.0395675405572026	500	0.5	18	No seasonality	Low
0.112760730740968	0.10787702696608	500	0.5	18	No seasonality	Low
0.25863617393407	0.267163256111353	500	0.5	18	No seasonality	Low
0.0347523273490468	0.0493200197222662	500	0.5	18	No seasonality	Low
0.14336173762572	0.135660039523131	500	0.5	18	No seasonality	Low
0.152678062704608	0.193224939594346	500	0.5	18	No seasonality	Low
0.097461413489396	0.0945272653993201	500	0.5	18	No seasonality	Low
0.122698380886006	0.112036565252823	500	0.5	18	No seasonality	Low
0.165892027116901	0.159684286853646	500	0.5	18	No seasonality	Low
0.187724732535277	0.1859145643126	500	0.5	18	No seasonality	Low
0.110615707248096	0.0953103351050764	500	0.5	18	No seasonality	Low
0.150962421515327	0.143023193567575	500	0.5	18	No seasonality	Low
-0.00419320176473418	-0.00703290922492869	500	0.5	18	No seasonality	Low
0.162647320135954	0.158273397780826	500	0.5	18	No seasonality	Low
0.145751636095914	0.152216839679723	500	0.5	18	No seasonality	Low
-0.0662532647012126	-0.0591183143688644	500	0.5	18	No seasonality	Low
0.0399778136849133	0.0364236930242659	500	0.5	18	No seasonality	Low
0.151698055556443	0.166948010345902	500	0.5	18	No seasonality	Low
0.0985930096932011	0.0946195588572067	500	0.5	18	No seasonality	Low
0.22082946872071	0.222666394690163	500	0.5	18	No seasonality	Low
0.219717085415315	0.219143027280517	500	0.5	18	No seasonality	Low
0.0467563512454215	0.0456781723064646	500	0.5	18	No seasonality	Low
0.130061427371514	0.140940811544497	500	0.5	18	No seasonality	Low
0.142639414258774	0.130624182297665	500	0.5	18	No seasonality	Low
-0.00494789896270157	-0.0101344888523266	500	0.5	18	No seasonality	Low
0.0230937171331897	0.021666977729678	500	0.5	18	No seasonality	Low
0.244838681320752	0.24480755121844	500	0.5	18	No seasonality	Low
0.220003373961512	0.226159753661481	500	0.5	18	No seasonality	Low
0.199590395732654	0.205792090763543	500	0.5	18	No seasonality	Low
0.14196490093198	0.12019648892606	500	0.5	18	No seasonality	Low
0.0848546466495891	0.0836645341727931	500	0.5	18	No seasonality	Low
0.182042586597362	0.163358538774719	5	0.5	18	No seasonality	High
0.33810360550982	0.319096975029517	5	0.5	18	No seasonality	High
0.202405536335079	0.21102435524534	5	0.5	18	No seasonality	High
-0.0439018248852981	-0.0480589911795964	5	0.5	18	No seasonality	High
0.333483116271981	0.34438124850191	5	0.5	18	No seasonality	High
0.27948166479338	0.280482485700331	5	0.5	18	No seasonality	High
0.202347417676065	0.178146506092245	5	0.5	18	No seasonality	High
0.31509933848764	0.335169608455237	5	0.5	18	No seasonality	High
0.224555055003788	0.212129732281763	5	0.5	18	No seasonality	High
0.350166571510648	0.340147004009973	5	0.5	18	No seasonality	High
-0.0272500273338526	-0.0194330901089411	5	0.5	18	No seasonality	High
0.108786437141203	0.123150744487358	5	0.5	18	No seasonality	High
0.0753541034664433	0.105874921851187	5	0.5	18	No seasonality	High
0.237620537107017	0.203703769738735	5	0.5	18	No seasonality	High
0.214264726830249	0.220133737854565	5	0.5	18	No seasonality	High
0.178273087754263	0.167686886882584	5	0.5	18	No seasonality	High
0.369226428131576	0.346061068698845	5	0.5	18	No seasonality	High
0.330462550551551	0.327894712669731	5	0.5	18	No seasonality	High
0.313971261792046	0.276071515572222	5	0.5	18	No seasonality	High
0.241084947922808	0.243306572152293	5	0.5	18	No seasonality	High
0.300603612244829	0.304885715916618	5	0.5	18	No seasonality	High
0.343270126424854	0.33122138876447	5	0.5	18	No seasonality	High
-0.00991376095057325	-0.00720615032511202	5	0.5	18	No seasonality	High
0.145231255794842	0.135752367846804	5	0.5	18	No seasonality	High
0.234152872955779	0.238688836445232	5	0.5	18	No seasonality	High
0.120609732654678	0.113003859895562	5	0.5	18	No seasonality	High
0.30547640849674	0.265885094936617	5	0.5	18	No seasonality	High
0.286958606940205	0.284912589821972	5	0.5	18	No seasonality	High
0.238347649219601	0.24594855681711	5	0.5	18	No seasonality	High
0.148038751331647	0.108282997625739	5	0.5	18	No seasonality	High
0.275607062288651	0.27136807929359	10	0.5	18	No seasonality	High
0.213826845509863	0.216996134035902	10	0.5	18	No seasonality	High
0.184015251500562	0.168839196052459	10	0.5	18	No seasonality	High
0.275968816176334	0.26726748918702	10	0.5	18	No seasonality	High
0.173742631477977	0.177485611836371	10	0.5	18	No seasonality	High
0.291860087629407	0.270989110741062	10	0.5	18	No seasonality	High
0.2272554954815	0.245132868713129	10	0.5	18	No seasonality	High
0.301074500674208	0.283422947529639	10	0.5	18	No seasonality	High
0.224505632791848	0.218487516038635	10	0.5	18	No seasonality	High
-0.00485206855742989	0.0243330717075262	10	0.5	18	No seasonality	High
0.223006485633751	0.235787915742794	10	0.5	18	No seasonality	High
0.162052313813898	0.156380276364169	10	0.5	18	No seasonality	High
0.200624972436522	0.204546582704151	10	0.5	18	No seasonality	High
0.158240465750748	0.146305342934775	10	0.5	18	No seasonality	High
0.256830217973388	0.262261574057095	10	0.5	18	No seasonality	High
-0.00368920473102902	0.0231332994011016	10	0.5	18	No seasonality	High
0.137062920680363	0.119037328515629	10	0.5	18	No seasonality	High
0.212398598342252	0.212363638885938	10	0.5	18	No seasonality	High
0.0582043626823603	0.0589985514385172	10	0.5	18	No seasonality	High
0.0839796238187591	0.0817145348694629	10	0.5	18	No seasonality	High
0.226832011757789	0.247962150547478	10	0.5	18	No seasonality	High
0.134086132080382	0.131460374307337	10	0.5	18	No seasonality	High
-0.0223739600432454	-0.0431924208988072	10	0.5	18	No seasonality	High
0.257464237656456	0.243339121953227	10	0.5	18	No seasonality	High
0.323890107744634	0.324095508502676	10	0.5	18	No seasonality	High
0.199959812425221	0.19338330598807	10	0.5	18	No seasonality	High
0.147159561311222	0.144747983210354	10	0.5	18	No seasonality	High
0.37091863087029	0.324472030450636	10	0.5	18	No seasonality	High
0.283905196004559	0.284436066458568	10	0.5	18	No seasonality	High
0.126920058342376	0.123333539546601	10	0.5	18	No seasonality	High
0.256184351180085	0.252591955918048	500	0.5	18	No seasonality	High
0.173655788568837	0.170034163751813	500	0.5	18	No seasonality	High
0.21247038616881	0.219765395222378	500	0.5	18	No seasonality	High
0.11651707553829	0.0790360414606887	500	0.5	18	No seasonality	High
0.193609747409472	0.19613711225131	500	0.5	18	No seasonality	High
0.117175221239963	0.0948397818903183	500	0.5	18	No seasonality	High
0.0541047058095836	0.0747143099727578	500	0.5	18	No seasonality	High
0.216819847226741	0.197683248018543	500	0.5	18	No seasonality	High
0.203360430096551	0.216293171337441	500	0.5	18	No seasonality	High
0.212556091783265	0.205379073498941	500	0.5	18	No seasonality	High
0.253155723945032	0.229466070167284	500	0.5	18	No seasonality	High
0.148423603628422	0.134940161706696	500	0.5	18	No seasonality	High
0.173386474354233	0.177018461288296	500	0.5	18	No seasonality	High
0.16938145601752	0.180982422652855	500	0.5	18	No seasonality	High
0.0834697395670354	0.091142564915971	500	0.5	18	No seasonality	High
0.0154242029024392	0.0225669360597521	500	0.5	18	No seasonality	High
0.146262080048849	0.158877964225711	500	0.5	18	No seasonality	High
-0.0552601113494933	-0.0840741506471207	500	0.5	18	No seasonality	High
0.242652017610488	0.237655083045358	500	0.5	18	No seasonality	High
0.138616058136478	0.130447061246059	500	0.5	18	No seasonality	High
-0.033850623632005	-0.0592827955696914	500	0.5	18	No seasonality	High
0.111747039277713	0.125854921256201	500	0.5	18	No seasonality	High
0.134876300334721	0.157354368641694	500	0.5	18	No seasonality	High
0.109065845907898	0.0940646910364999	500	0.5	18	No seasonality	High
0.10081016242755	0.0908712566473759	500	0.5	18	No seasonality	High
0.31813499189648	0.291560946429842	500	0.5	18	No seasonality	High
0.04813543679944	0.0380205781436837	500	0.5	18	No seasonality	High
-0.0345125207143954	-0.0486049623010523	500	0.5	18	No seasonality	High
0.161248475389323	0.15513402616981	500	0.5	18	No seasonality	High
0.136530800906842	0.155995664352649	500	0.5	18	No seasonality	High
0.4134455444852	0.409281956933521	5	0.5	18	Seasonality	Low
0.456858141016906	0.473516937994329	5	0.5	18	Seasonality	Low
0.462412340694389	0.470265292696914	5	0.5	18	Seasonality	Low
0.378719175320105	0.385816403473138	5	0.5	18	Seasonality	Low
0.431555479372207	0.470574353354716	5	0.5	18	Seasonality	Low
0.398669880839752	0.393539684715583	5	0.5	18	Seasonality	Low
0.364177209355379	0.308502535307219	5	0.5	18	Seasonality	Low
0.44348505541838	0.441835890468164	5	0.5	18	Seasonality	Low
0.375944734617789	0.391301343349601	5	0.5	18	Seasonality	Low
0.348963473361447	0.289586231748709	5	0.5	18	Seasonality	Low
0.346381801166302	0.340652612997921	5	0.5	18	Seasonality	Low
0.326078440990556	0.298585236413861	5	0.5	18	Seasonality	Low
0.423013702044215	0.424551953779711	5	0.5	18	Seasonality	Low
0.226602623476919	0.225317636374325	5	0.5	18	Seasonality	Low
0.336510545879822	0.338965092757722	5	0.5	18	Seasonality	Low
0.312729552982255	0.296397477480375	5	0.5	18	Seasonality	Low
0.429033358143013	0.449567904947297	5	0.5	18	Seasonality	Low
0.424944803842199	0.412613799201575	5	0.5	18	Seasonality	Low
0.313059535866418	0.282899038700195	5	0.5	18	Seasonality	Low
0.0297609824641447	0.0482235814083615	5	0.5	18	Seasonality	Low
0.38350764325705	0.380830523048503	5	0.5	18	Seasonality	Low
0.379825032063897	0.387530194444214	5	0.5	18	Seasonality	Low
0.418290827863228	0.417160825111901	5	0.5	18	Seasonality	Low
0.451222482947277	0.451302641333795	5	0.5	18	Seasonality	Low
0.357593203496685	0.338995881094319	5	0.5	18	Seasonality	Low
0.453717760844485	0.451802695369997	5	0.5	18	Seasonality	Low
0.465626940366674	0.441320127700766	5	0.5	18	Seasonality	Low
0.418184990863686	0.429524622582935	5	0.5	18	Seasonality	Low
0.413043896683523	0.416516508320945	5	0.5	18	Seasonality	Low
0.416074647942304	0.419476324133305	5	0.5	18	Seasonality	Low
0.428494687828063	0.430210316841298	5	0.5	18	Seasonality	Low
0.42886607480562	0.438204771505762	5	0.5	18	Seasonality	Low
0.445190939423285	0.437422522163355	5	0.5	18	Seasonality	Low
0.4315607921897	0.43468149856994	5	0.5	18	Seasonality	Low
0.434232441949386	0.43384673081246	5	0.5	18	Seasonality	Low
0.435395721611003	0.42383967230276	5	0.5	18	Seasonality	Low
0.426056567429403	0.435439692581435	5	0.5	18	Seasonality	Low
0.440151779126958	0.43937064977165	5	0.5	18	Seasonality	Low
0.416645167240016	0.42633355155337	5	0.5	18	Seasonality	Low
0.447258996079689	0.45095882191738	5	0.5	18	Seasonality	Low
0.45014501631611	0.452696057991086	5	0.5	18	Seasonality	Low
0.405964578634374	0.416914418596627	5	0.5	18	Seasonality	Low
0.38903871756377	0.395889542681405	5	0.5	18	Seasonality	Low
0.416728016054371	0.417418273697421	5	0.5	18	Seasonality	Low
0.404545624666416	0.404640849374062	5	0.5	18	Seasonality	Low
0.44829398094001	0.444970577901783	5	0.5	18	Seasonality	Low
0.412055795960578	0.40579939727759	5	0.5	18	Seasonality	Low
0.452097345756376	0.45795670373608	5	0.5	18	Seasonality	Low
0.323238372005096	0.334907711415058	5	0.5	18	Seasonality	Low
0.203680322691703	0.221889707817451	5	0.5	18	Seasonality	Low
0.383639685132507	0.386339714189751	5	0.5	18	Seasonality	Low
0.130992092032171	0.142344177998596	5	0.5	18	Seasonality	Low
0.466792632520315	0.474812960358016	5	0.5	18	Seasonality	Low
0.275045518262142	0.268670731264613	5	0.5	18	Seasonality	Low
-0.00947858341490665	-0.021825038375324	5	0.5	18	Seasonality	Low
0.318745180159436	0.316790558879596	5	0.5	18	Seasonality	Low
0.382362567542355	0.399971172885167	5	0.5	18	Seasonality	Low
0.330785096184902	0.311405945439344	5	0.5	18	Seasonality	Low
0.397369947873827	0.404292934200164	5	0.5	18	Seasonality	Low
0.334128013246142	0.316848954635066	5	0.5	18	Seasonality	Low
0.392074331482612	0.389466221293342	5	0.5	18	Seasonality	Low
0.240512617562313	0.273190932144496	5	0.5	18	Seasonality	Low
0.193810777209225	0.223405622382125	5	0.5	18	Seasonality	Low
0.177647851554312	0.16917775828531	5	0.5	18	Seasonality	Low
0.444408497835312	0.446171266926123	5	0.5	18	Seasonality	Low
0.361121237797041	0.356569440860472	5	0.5	18	Seasonality	Low
0.172982850950202	0.156867502369409	5	0.5	18	Seasonality	Low
0.333988233448139	0.316541634026315	5	0.5	18	Seasonality	Low
0.266983826223337	0.235070864076845	5	0.5	18	Seasonality	Low
0.219939383308912	0.240651076566347	5	0.5	18	Seasonality	Low
0.0567925271461783	0.0658033834375163	5	0.5	18	Seasonality	Low
0.429592029465239	0.420498393365751	5	0.5	18	Seasonality	Low
0.336882082585061	0.343635472157012	5	0.5	18	Seasonality	Low
0.141960523690304	0.148133417461474	5	0.5	18	Seasonality	Low
0.100904980057221	0.0972941486539979	5	0.5	18	Seasonality	Low
0.293786105041037	0.29518052921452	5	0.5	18	Seasonality	Low
0.323412949988869	0.344453688659018	5	0.5	18	Seasonality	Low
0.377185665642641	0.311266907904778	5	0.5	18	Seasonality	Low
0.417836506984768	0.415534659170047	5	0.5	18	Seasonality	Low
0.446627859834765	0.456640338978185	5	0.5	18	Seasonality	Low
0.197377064524995	0.228554469277073	5	0.5	18	Seasonality	Low
0.341555204665195	0.328933095791815	5	0.5	18	Seasonality	Low
0.120768368581206	0.122739059158698	5	0.5	18	Seasonality	Low
0.24932548039607	0.246059971387331	5	0.5	18	Seasonality	Low
0.344004340912865	0.35537236461451	5	0.5	18	Seasonality	Low
0.241804652701762	0.262601641260056	5	0.5	18	Seasonality	Low
0.0481815256652096	0.0776743705520225	5	0.5	18	Seasonality	Low
0.125077000610557	0.117143571219268	5	0.5	18	Seasonality	Low
0.359073998081704	0.372307990854811	5	0.5	18	Seasonality	Low
0.252652942824645	0.272006468619303	5	0.5	18	Seasonality	Low
0.252351385209826	0.235772465790581	5	0.5	18	Seasonality	Low
0.396584205159761	0.387823165910496	5	0.5	18	Seasonality	Low
0.170131947185644	0.198202298880847	5	0.5	18	Seasonality	Low
0.202302934999785	0.200438946499572	5	0.5	18	Seasonality	Low
0.403966977505713	0.405646063028987	5	0.5	18	Seasonality	Low
0.265679515022282	0.24191901722587	5	0.5	18	Seasonality	Low
0.34721393865623	0.361674999683876	5	0.5	18	Seasonality	Low
0.393281693575301	0.397467965050868	5	0.5	18	Seasonality	Low
0.176163207738373	0.179799996733577	5	0.5	18	Seasonality	Low
0.151440016981095	0.159653286389049	5	0.5	18	Seasonality	Low
0.199745190037635	0.185672744129426	5	0.5	18	Seasonality	Low
0.156215179013877	0.151803428065319	5	0.5	18	Seasonality	Low
0.11976508071109	0.13534003537915	5	0.5	18	Seasonality	Low
0.238073124979884	0.223738991615393	5	0.5	18	Seasonality	Low
0.362735009919362	0.389309934590213	5	0.5	18	Seasonality	Low
0.0621805450451105	0.146241855125682	10	0.5	18	Seasonality	Low
0.391519597579864	0.410975067929536	10	0.5	18	Seasonality	Low
0.220294142527526	0.231413209352734	10	0.5	18	Seasonality	Low
0.385244564110711	0.387529512929977	10	0.5	18	Seasonality	Low
0.353503497270942	0.34734932921853	10	0.5	18	Seasonality	Low
0.359625152917684	0.360696773368759	10	0.5	18	Seasonality	Low
0.305824473695595	0.328841067154981	10	0.5	18	Seasonality	Low
0.2505412340862	0.245088683417482	10	0.5	18	Seasonality	Low
0.194655718751044	0.186006294554206	10	0.5	18	Seasonality	Low
0.199721570049964	0.186816500831601	10	0.5	18	Seasonality	Low
0.298603205091134	0.296450423101526	10	0.5	18	Seasonality	Low
0.39897086798113	0.40203499051896	10	0.5	18	Seasonality	Low
0.24394376052405	0.19286693221104	10	0.5	18	Seasonality	Low
0.371291328189454	0.391191720884124	10	0.5	18	Seasonality	Low
0.169421412019934	0.141237320285688	10	0.5	18	Seasonality	Low
0.40987729101826	0.413350040033964	10	0.5	18	Seasonality	Low
0.281182733162416	0.273225475581627	10	0.5	18	Seasonality	Low
0.209247779409627	0.185891496351421	10	0.5	18	Seasonality	Low
0.309136673888181	0.298683340630848	10	0.5	18	Seasonality	Low
0.26374495780435	0.234829344467211	10	0.5	18	Seasonality	Low
0.330667338495711	0.337966933310313	10	0.5	18	Seasonality	Low
0.16101555071525	0.141392243257733	10	0.5	18	Seasonality	Low
0.306207043604489	0.297010412530064	10	0.5	18	Seasonality	Low
0.347566093453504	0.369967888077905	10	0.5	18	Seasonality	Low
0.344128011028839	0.334058624797727	10	0.5	18	Seasonality	Low
0.308600768398011	0.312968253619211	10	0.5	18	Seasonality	Low
0.185849061164917	0.174825664739887	10	0.5	18	Seasonality	Low
0.386900956937761	0.391478029988706	10	0.5	18	Seasonality	Low
0.330830231390281	0.328153887373087	10	0.5	18	Seasonality	Low
0.352982225526833	0.339737198100034	10	0.5	18	Seasonality	Low
0.0331025849933918	0.126803275262671	10	0.5	18	Seasonality	Low
0.310385183234936	0.310803312583625	10	0.5	18	Seasonality	Low
0.332583663542831	0.331968988798005	10	0.5	18	Seasonality	Low
0.223082915227967	0.242607355466131	10	0.5	18	Seasonality	Low
0.388892266471331	0.387422249152759	10	0.5	18	Seasonality	Low
0.377490824728158	0.374655647578267	10	0.5	18	Seasonality	Low
0.405165627574096	0.391399807576585	10	0.5	18	Seasonality	Low
0.218604899278536	0.225591001458721	10	0.5	18	Seasonality	Low
0.132958376568293	0.130225242553806	10	0.5	18	Seasonality	Low
0.312974240955506	0.317551098876335	10	0.5	18	Seasonality	Low
0.176226304913447	0.176764191586926	10	0.5	18	Seasonality	Low
0.312205494881248	0.330970452295096	10	0.5	18	Seasonality	Low
0.0652365263198604	0.0809267521504555	10	0.5	18	Seasonality	Low
0.180110124028008	0.159914880025409	10	0.5	18	Seasonality	Low
0.227196797857114	0.213222477864147	10	0.5	18	Seasonality	Low
0.205206769993468	0.214353876902197	10	0.5	18	Seasonality	Low
0.294068646722589	0.267122101635524	10	0.5	18	Seasonality	Low
0.0768133752036574	0.0750490679026893	10	0.5	18	Seasonality	Low
0.203863465665246	0.229276007403177	10	0.5	18	Seasonality	Low
0.233548312896383	0.229859536788231	10	0.5	18	Seasonality	Low
0.158041557514856	0.166048855039565	10	0.5	18	Seasonality	Low
0.332835766419772	0.301607214497651	10	0.5	18	Seasonality	Low
0.253443955140391	0.235352414882856	10	0.5	18	Seasonality	Low
0.345166114893715	0.344525508546957	10	0.5	18	Seasonality	Low
0.0685719244289472	0.0670857534485028	10	0.5	18	Seasonality	Low
0.189531611857245	0.155081919555892	10	0.5	18	Seasonality	Low
0.328186904834955	0.357159453225442	10	0.5	18	Seasonality	Low
0.360773999375769	0.381086957321057	10	0.5	18	Seasonality	Low
0.28365840320653	0.291021334840341	10	0.5	18	Seasonality	Low
0.345164831305649	0.346474412781974	10	0.5	18	Seasonality	Low
0.331414436200825	0.330657333710576	10	0.5	18	Seasonality	Low
0.323455670619291	0.324449190489351	10	0.5	18	Seasonality	Low
0.34187959300645	0.335543999944651	10	0.5	18	Seasonality	Low
0.258704333192856	0.25152254481339	10	0.5	18	Seasonality	Low
0.289570462948864	0.276810137383017	10	0.5	18	Seasonality	Low
0.153665024956192	0.145189169247129	10	0.5	18	Seasonality	Low
0.305119611533951	0.289854297919623	10	0.5	18	Seasonality	Low
0.282655093839841	0.277198009519861	10	0.5	18	Seasonality	Low
0.0102403731702668	0.0218410832144754	10	0.5	18	Seasonality	Low
0.262793110055245	0.26640358995945	10	0.5	18	Seasonality	Low
0.294030263326272	0.299560885230505	10	0.5	18	Seasonality	Low
0.231571692697947	0.231859641311875	10	0.5	18	Seasonality	Low
0.363692797117964	0.373294189506748	10	0.5	18	Seasonality	Low
0.155224266949949	0.126452018980919	10	0.5	18	Seasonality	Low
0.0352116982525869	0.0634644746531454	10	0.5	18	Seasonality	Low
0.344461344113291	0.337511238352557	10	0.5	18	Seasonality	Low
0.196263749005776	0.20714506646699	10	0.5	18	Seasonality	Low
0.363736403387176	0.366846668824943	10	0.5	18	Seasonality	Low
0.260550073142119	0.237463050607894	10	0.5	18	Seasonality	Low
0.130321135595821	0.13795360782044	10	0.5	18	Seasonality	Low
0.134965878502131	0.128107104801259	10	0.5	18	Seasonality	Low
0.174784796821852	0.179076572964516	10	0.5	18	Seasonality	Low
0.17287395286722	0.182926101956545	10	0.5	18	Seasonality	Low
0.343463339137453	0.348946264150672	10	0.5	18	Seasonality	Low
0.065338043093014	0.187456991979492	10	0.5	18	Seasonality	Low
0.145626509627159	0.143251807008082	10	0.5	18	Seasonality	Low
0.123376162255762	0.113273540740616	10	0.5	18	Seasonality	Low
-0.00729432594829195	-0.00809354341486845	10	0.5	18	Seasonality	Low
0.136977803475487	0.133538463711795	10	0.5	18	Seasonality	Low
0.381536552602099	0.373142872981982	10	0.5	18	Seasonality	Low
0.252119661889044	0.257960699712589	10	0.5	18	Seasonality	Low
0.38036953737735	0.373335934301123	10	0.5	18	Seasonality	Low
0.259001675468457	0.233487353929821	10	0.5	18	Seasonality	Low
0.248426219591949	0.235748466605711	10	0.5	18	Seasonality	Low
0.356746947324507	0.345696611113521	10	0.5	18	Seasonality	Low
0.125151021456843	0.12535785189921	10	0.5	18	Seasonality	Low
0.332283690941891	0.3304686014336	10	0.5	18	Seasonality	Low
0.232334015493413	0.234992378914354	10	0.5	18	Seasonality	Low
0.306340498292178	0.307005855634086	10	0.5	18	Seasonality	Low
0.0320376471596882	0.146906088472508	10	0.5	18	Seasonality	Low
0.384219416808059	0.366077748455286	10	0.5	18	Seasonality	Low
-0.00802879807823623	-0.0163357487490061	10	0.5	18	Seasonality	Low
0.274814973281676	0.284316779136534	10	0.5	18	Seasonality	Low
0.377083791812047	0.350444830732281	10	0.5	18	Seasonality	Low
0.35949042091465	0.351608417161745	10	0.5	18	Seasonality	Low
0.26797401338523	0.268437250996065	500	0.5	18	Seasonality	Low
0.185740884683683	0.191859977064184	500	0.5	18	Seasonality	Low
0.203898949642215	0.223520930853535	500	0.5	18	Seasonality	Low
0.22533709144574	0.240294988131516	500	0.5	18	Seasonality	Low
0.212282348453524	0.223972532974491	500	0.5	18	Seasonality	Low
0.298170783770528	0.31989571321503	500	0.5	18	Seasonality	Low
0.0653196018424727	0.0711727487009436	500	0.5	18	Seasonality	Low
0.24441219377478	0.220591331403284	500	0.5	18	Seasonality	Low
0.238532514743713	0.236494982753569	500	0.5	18	Seasonality	Low
0.253401112410699	0.253018246543189	500	0.5	18	Seasonality	Low
0.25985282989671	0.264912056409412	500	0.5	18	Seasonality	Low
0.219190703271688	0.215688959255708	500	0.5	18	Seasonality	Low
0.227695814863514	0.228630337241832	500	0.5	18	Seasonality	Low
0.183231444880194	0.166174580048418	500	0.5	18	Seasonality	Low
0.221970703010523	0.216419567473915	500	0.5	18	Seasonality	Low
0.187704993877376	0.183456944124283	500	0.5	18	Seasonality	Low
0.268755506120921	0.265336879536548	500	0.5	18	Seasonality	Low
0.0259962274575075	0.0284094211083301	500	0.5	18	Seasonality	Low
0.139460381637417	0.145828164739737	500	0.5	18	Seasonality	Low
0.288854287800735	0.308480662831782	500	0.5	18	Seasonality	Low
0.273214872591601	0.286372707018949	500	0.5	18	Seasonality	Low
0.215979151068875	0.21258254928046	500	0.5	18	Seasonality	Low
0.233541010307927	0.244199985599657	500	0.5	18	Seasonality	Low
0.305746795770252	0.290091145123116	500	0.5	18	Seasonality	Low
0.206152651553389	0.211795409959652	500	0.5	18	Seasonality	Low
0.203216298182596	0.199973309330236	500	0.5	18	Seasonality	Low
0.23991752378666	0.230151168513511	500	0.5	18	Seasonality	Low
0.270285618478856	0.274182837262759	500	0.5	18	Seasonality	Low
0.281488961933067	0.277943311897131	500	0.5	18	Seasonality	Low
0.241693954051818	0.235055201880895	500	0.5	18	Seasonality	Low
0.187375463310222	0.172500136901557	500	0.5	18	Seasonality	Low
0.116569950397823	0.130123641796844	500	0.5	18	Seasonality	Low
0.248959962295945	0.25206912680058	500	0.5	18	Seasonality	Low
0.223803366306324	0.23965091808743	500	0.5	18	Seasonality	Low
0.235382052275027	0.230918898419632	500	0.5	18	Seasonality	Low
0.208934935873835	0.199396961177154	500	0.5	18	Seasonality	Low
0.00359442920152073	0.00201636083408796	500	0.5	18	Seasonality	Low
0.201853895942963	0.219655718670071	500	0.5	18	Seasonality	Low
0.0543710220935436	0.0186835069165353	500	0.5	18	Seasonality	Low
0.143659278338953	0.125524242343115	500	0.5	18	Seasonality	Low
-0.00357724710480155	0.0030343883158775	500	0.5	18	Seasonality	Low
0.0339566928391179	0.0398969646122523	500	0.5	18	Seasonality	Low
0.147109826881884	0.138586001415339	500	0.5	18	Seasonality	Low
0.145329182670831	0.157052564540463	500	0.5	18	Seasonality	Low
0.0409729942371278	0.0559969525849815	500	0.5	18	Seasonality	Low
-0.0037921797918475	-0.000894781404472633	500	0.5	18	Seasonality	Low
0.101985307099563	0.103070305043658	500	0.5	18	Seasonality	Low
0.0508842714056277	0.0624159016403051	500	0.5	18	Seasonality	Low
0.12080406724585	0.125194929604135	500	0.5	18	Seasonality	Low
0.00684024072271392	0.0100228169810969	500	0.5	18	Seasonality	Low
0.127040929337726	0.147126523578828	500	0.5	18	Seasonality	Low
0.0684566067092706	0.0670736001766685	500	0.5	18	Seasonality	Low
0.149488062308269	0.154185395448053	500	0.5	18	Seasonality	Low
0.083878614895565	0.0909908675346907	500	0.5	18	Seasonality	Low
-0.0128736543497036	0.00604865883714793	500	0.5	18	Seasonality	Low
0.146463854978119	0.138286264593304	500	0.5	18	Seasonality	Low
0.156584618582883	0.163743681262638	500	0.5	18	Seasonality	Low
0.205953182555424	0.209219928069767	500	0.5	18	Seasonality	Low
0.1998935216811	0.210148141534389	500	0.5	18	Seasonality	Low
0.277391801004195	0.27944071595812	500	0.5	18	Seasonality	Low
-0.0147180777804282	-0.0145627590041098	500	0.5	18	Seasonality	Low
0.206286028635248	0.207648899074333	500	0.5	18	Seasonality	Low
0.193818573746521	0.198795941664154	500	0.5	18	Seasonality	Low
0.0565982712792117	0.0566230003220988	500	0.5	18	Seasonality	Low
0.0835795623614612	0.0860111981376862	500	0.5	18	Seasonality	Low
0.105740088017565	0.104951100728349	500	0.5	18	Seasonality	Low
0.262066167060763	0.263808108141431	500	0.5	18	Seasonality	Low
0.176936738034012	0.157822525317618	500	0.5	18	Seasonality	Low
0.195173497814043	0.192094519218784	500	0.5	18	Seasonality	Low
-0.0345741649899327	-0.0218243470864634	500	0.5	18	Seasonality	Low
0.308266057983952	0.336588463083022	500	0.5	18	Seasonality	Low
0.0403350699817858	0.0393389686785728	500	0.5	18	Seasonality	Low
0.203320091912466	0.205434595034577	500	0.5	18	Seasonality	Low
0.122698956162585	0.110310426458586	500	0.5	18	Seasonality	Low
0.127293717120864	0.113131631593243	500	0.5	18	Seasonality	Low
0.115160952973566	0.106953698969071	500	0.5	18	Seasonality	Low
0.253084590172176	0.252703826174388	500	0.5	18	Seasonality	Low
0.228344802452647	0.218297056193641	500	0.5	18	Seasonality	Low
0.0706514060015025	0.0668549722812028	500	0.5	18	Seasonality	Low
0.176688998664207	0.179586710062387	500	0.5	18	Seasonality	Low
0.0187862407113203	0.0172593711921725	500	0.5	18	Seasonality	Low
0.203400126528873	0.201631865229503	500	0.5	18	Seasonality	Low
0.150847039342816	0.141741972735391	500	0.5	18	Seasonality	Low
0.120463604072225	0.111076620366239	500	0.5	18	Seasonality	Low
0.195041778743263	0.193844157631073	500	0.5	18	Seasonality	Low
0.224749675085177	0.26932502512418	500	0.5	18	Seasonality	Low
0.289010324088146	0.282923000747801	500	0.5	18	Seasonality	Low
0.11421792596831	0.115226198139459	500	0.5	18	Seasonality	Low
0.180637860312119	0.191258006439404	500	0.5	18	Seasonality	Low
0.198610636527906	0.197792523569821	500	0.5	18	Seasonality	Low
0.108151971049481	0.101451855663652	500	0.5	18	Seasonality	Low
0.271463197177503	0.263874115208556	500	0.5	18	Seasonality	Low
0.203655941264109	0.208049977259667	500	0.5	18	Seasonality	Low
0.273993759075956	0.268908703092474	500	0.5	18	Seasonality	Low
0.116194018633055	0.0994474524417505	500	0.5	18	Seasonality	Low
-0.0367661528745864	-0.0386433647317809	500	0.5	18	Seasonality	Low
0.144180526842031	0.129024877962204	500	0.5	18	Seasonality	Low
0.120688267122086	0.109390700491919	500	0.5	18	Seasonality	Low
0.267278914487339	0.279400242879586	500	0.5	18	Seasonality	Low
0.191303911587119	0.189436240126445	500	0.5	18	Seasonality	Low
0.0668103185183621	0.0569158421756214	500	0.5	18	Seasonality	Low
0.258869964251403	0.256128338896701	500	0.5	18	Seasonality	Low
0.208478936333451	0.219996901126412	500	0.5	18	Seasonality	Low
0.233250794188602	0.230706630271775	500	0.5	18	Seasonality	Low
0.200597451876454	0.189429755623477	500	0.5	18	Seasonality	Low
0.320342164942763	0.314072430722203	5	0.5	18	Seasonality	High
0.320132651968088	0.345600298730951	5	0.5	18	Seasonality	High
0.146574204544991	0.170247300432743	5	0.5	18	Seasonality	High
0.383703301232018	0.331287120790543	5	0.5	18	Seasonality	High
0.328549944326601	0.301006675671727	5	0.5	18	Seasonality	High
0.287788112805062	0.28381777112949	5	0.5	18	Seasonality	High
0.394648767967707	0.381649207215854	5	0.5	18	Seasonality	High
0.346945135437129	0.335830696265927	5	0.5	18	Seasonality	High
0.38252009970714	0.40044656541004	5	0.5	18	Seasonality	High
0.105059287777931	0.0948299999993636	5	0.5	18	Seasonality	High
0.359164034998398	0.378768964113417	5	0.5	18	Seasonality	High
0.313000572053043	0.309467417631422	5	0.5	18	Seasonality	High
0.360559194487001	0.323090332111036	5	0.5	18	Seasonality	High
0.290107818591712	0.268121424334715	5	0.5	18	Seasonality	High
0.118251414861335	0.138317849345168	5	0.5	18	Seasonality	High
0.428869686434492	0.421489358217743	5	0.5	18	Seasonality	High
0.363067254860118	0.35737435782316	5	0.5	18	Seasonality	High
0.34702859885711	0.357481634222622	5	0.5	18	Seasonality	High
0.0609471547686741	0.100263547597447	5	0.5	18	Seasonality	High
-0.0419212071330855	-0.0353183082760176	5	0.5	18	Seasonality	High
0.403671076502019	0.395863909129591	5	0.5	18	Seasonality	High
0.0609331285977722	0.074458799322929	5	0.5	18	Seasonality	High
0.316386727299022	0.312011450952621	5	0.5	18	Seasonality	High
0.306148895114928	0.317568555985204	5	0.5	18	Seasonality	High
0.402671266435995	0.368624347691342	5	0.5	18	Seasonality	High
0.266543506511023	0.336160415446374	5	0.5	18	Seasonality	High
0.125194017516338	0.130266284877723	5	0.5	18	Seasonality	High
0.469448282328774	0.454393115616908	5	0.5	18	Seasonality	High
0.26513964288443	0.273258853763124	5	0.5	18	Seasonality	High
0.406817014799286	0.369844723609809	5	0.5	18	Seasonality	High
0.383818441721392	0.396553953321366	5	0.5	18	Seasonality	High
0.356446978127824	0.331038287255759	5	0.5	18	Seasonality	High
0.389456444994384	0.403585760359665	5	0.5	18	Seasonality	High
0.317372015274351	0.301995157686915	5	0.5	18	Seasonality	High
-0.0307802204656394	-0.0279200814132213	5	0.5	18	Seasonality	High
0.427250566616897	0.44270862846735	5	0.5	18	Seasonality	High
-0.00623161893115093	-0.0236977483098355	5	0.5	18	Seasonality	High
-0.00100637778441608	0.00292727154948255	5	0.5	18	Seasonality	High
0.432771593961058	0.38486649059259	5	0.5	18	Seasonality	High
-0.0109049905448145	0.00312412800255082	5	0.5	18	Seasonality	High
-0.0137974071257244	-0.0175093522356277	5	0.5	18	Seasonality	High
-0.026437634862229	-0.0500400315052528	5	0.5	18	Seasonality	High
0.42846920651177	0.437277794531438	5	0.5	18	Seasonality	High
-0.0097239375874826	-0.0174875216772359	5	0.5	18	Seasonality	High
0.113688101266016	0.120442535802983	5	0.5	18	Seasonality	High
0.00331604830175398	-0.0163034719794302	5	0.5	18	Seasonality	High
0.42671130782183	0.450660369199036	5	0.5	18	Seasonality	High
0.324741322787517	0.323492118427423	5	0.5	18	Seasonality	High
0.0872962650143098	0.0921788440349413	5	0.5	18	Seasonality	High
0.0733900541643693	0.0567991141919018	5	0.5	18	Seasonality	High
-0.018380904292209	-0.0218745030219516	5	0.5	18	Seasonality	High
-0.0126046042940378	-0.0161534291982869	5	0.5	18	Seasonality	High
-0.0275451988717749	-0.0301369981217899	5	0.5	18	Seasonality	High
0.162284877762389	0.146879180212027	5	0.5	18	Seasonality	High
0.0047828931775074	-3.70207598478778e-05	5	0.5	18	Seasonality	High
-0.00526026383834547	0.012016755421441	5	0.5	18	Seasonality	High
-0.00853050749951645	0.0146246824240814	5	0.5	18	Seasonality	High
-0.0457276548557482	-0.0500004140237574	5	0.5	18	Seasonality	High
0.0023777468634562	-0.00153532612469434	5	0.5	18	Seasonality	High
-0.0176288233949842	-0.0259740031814831	5	0.5	18	Seasonality	High
0.0778357643548822	0.0618303828463973	5	0.5	18	Seasonality	High
-0.0240238412837561	-0.0125914254802178	5	0.5	18	Seasonality	High
0.021672864340371	0.0267486521650481	5	0.5	18	Seasonality	High
-0.0408596505787416	-0.0163370401425937	5	0.5	18	Seasonality	High
0.0341590272336577	0.0860995649207799	5	0.5	18	Seasonality	High
0.330863308184567	0.332102585962615	10	0.5	18	Seasonality	High
0.280751025917338	0.287625450703582	10	0.5	18	Seasonality	High
0.134881508556007	0.151224095067759	10	0.5	18	Seasonality	High
0.295376723047436	0.284321312234959	10	0.5	18	Seasonality	High
0.00831547272389198	-0.0137982214650823	10	0.5	18	Seasonality	High
0.270653102130391	0.262566544975067	10	0.5	18	Seasonality	High
0.280835393525636	0.302765498926662	10	0.5	18	Seasonality	High
0.271832599193727	0.263290616388677	10	0.5	18	Seasonality	High
0.360545411361827	0.349032411752116	10	0.5	18	Seasonality	High
0.297713765769489	0.298616031562078	10	0.5	18	Seasonality	High
0.111105404484253	0.105518272530238	10	0.5	18	Seasonality	High
0.324362245459518	0.328807176720433	10	0.5	18	Seasonality	High
0.230522988734801	0.231352290763588	10	0.5	18	Seasonality	High
0.0917365712563113	0.10701009864115	10	0.5	18	Seasonality	High
0.150855147271711	0.152984413310439	10	0.5	18	Seasonality	High
0.325142962302439	0.322230711872683	10	0.5	18	Seasonality	High
0.280127338483898	0.285864182499711	10	0.5	18	Seasonality	High
0.295417706597833	0.298134514155313	10	0.5	18	Seasonality	High
0.287432540292262	0.274467889079818	10	0.5	18	Seasonality	High
0.314379978262105	0.311388048860969	10	0.5	18	Seasonality	High
0.324557016051271	0.334887334651828	10	0.5	18	Seasonality	High
0.365790802040139	0.356146041586115	10	0.5	18	Seasonality	High
0.140392559904627	0.13356194823566	10	0.5	18	Seasonality	High
0.364124591575734	0.34645793429596	10	0.5	18	Seasonality	High
0.303874939500236	0.286984113700785	10	0.5	18	Seasonality	High
0.284783072733985	0.27536018379089	10	0.5	18	Seasonality	High
-0.0525140108801103	-0.0133604826956747	10	0.5	18	Seasonality	High
-0.0512052930548041	-0.0222632834956971	10	0.5	18	Seasonality	High
0.00814528381273601	0.0209631179374498	10	0.5	18	Seasonality	High
-0.00386863471569764	-0.00366103870492704	10	0.5	18	Seasonality	High
-0.00722754452799937	-0.025164770262538	10	0.5	18	Seasonality	High
-0.0504994159305934	-0.0565578764430808	10	0.5	18	Seasonality	High
0.00828066975314161	0.0126629375774129	10	0.5	18	Seasonality	High
-0.026656752048297	-0.052824253937649	10	0.5	18	Seasonality	High
-0.0195254434046392	0.0061439219539782	10	0.5	18	Seasonality	High
-0.0435185179763662	-0.0432647926151618	10	0.5	18	Seasonality	High
-0.0388814261372232	-0.0508445245485612	10	0.5	18	Seasonality	High
-0.0244188063275468	-0.0282419826016343	10	0.5	18	Seasonality	High
0.126770505150984	0.0906792406493943	10	0.5	18	Seasonality	High
-0.000697839802256461	0.0195042349952081	10	0.5	18	Seasonality	High
-0.000435131660675396	0.0394207830405819	10	0.5	18	Seasonality	High
0.0559091362042159	0.0532232769074052	10	0.5	18	Seasonality	High
-0.0316259872001844	-0.042078131682922	10	0.5	18	Seasonality	High
0.0272882506561209	0.0633577293613649	10	0.5	18	Seasonality	High
-0.0117486497960573	-0.00898308520619615	10	0.5	18	Seasonality	High
-0.0181897394793065	-0.000314680720262389	10	0.5	18	Seasonality	High
-0.0189728503842604	-0.0139169072510433	10	0.5	18	Seasonality	High
0.290474280558863	0.310651451154378	10	0.5	18	Seasonality	High
-0.0455736012598696	-0.0706238913438189	10	0.5	18	Seasonality	High
0.240469763659568	0.237018551290292	10	0.5	18	Seasonality	High
0.164710467379208	0.163167635462649	500	0.5	18	Seasonality	High
0.133870640457514	0.107269206232555	500	0.5	18	Seasonality	High
0.262722416837927	0.236307215848648	500	0.5	18	Seasonality	High
0.20357820920337	0.186680160930753	500	0.5	18	Seasonality	High
0.253086475644013	0.24119792276629	500	0.5	18	Seasonality	High
0.180378618541535	0.17532096488915	500	0.5	18	Seasonality	High
0.132849787062212	0.116618859172766	500	0.5	18	Seasonality	High
-0.0415654341717253	-0.0174182697705875	500	0.5	18	Seasonality	High
0.019386501605755	0.02669011811203	500	0.5	18	Seasonality	High
0.185212353978172	0.155032881700627	500	0.5	18	Seasonality	High
-0.011111669643158	0.00159707297230788	500	0.5	18	Seasonality	High
0.189537382455427	0.169728975221384	500	0.5	18	Seasonality	High
-0.00575956334884298	-0.0110726629021666	500	0.5	18	Seasonality	High
0.172596531542825	0.166716974060391	500	0.5	18	Seasonality	High
0.251082668997105	0.241690689944266	500	0.5	18	Seasonality	High
0.15980992834536	0.163846537265243	500	0.5	18	Seasonality	High
0.216398667138467	0.196899126035064	500	0.5	18	Seasonality	High
0.1855004522229	0.176606916414277	500	0.5	18	Seasonality	High
0.179193659370476	0.190225632919699	500	0.5	18	Seasonality	High
0.0352125511385635	0.0578993308764137	500	0.5	18	Seasonality	High
-0.0610190717269547	-0.0493559991401713	500	0.5	18	Seasonality	High
0.128904538993289	0.126756637846442	500	0.5	18	Seasonality	High
0.0379124614272703	0.0385154118817649	500	0.5	18	Seasonality	High
0.300342816632198	0.275746918597072	500	0.5	18	Seasonality	High
0.166275230482452	0.160582565051226	500	0.5	18	Seasonality	High
0.156306394071001	0.162114799952976	500	0.5	18	Seasonality	High
-0.0294614527328931	-0.0312299376094339	500	0.5	18	Seasonality	High
0.0935311747284984	0.085488763650045	500	0.5	18	Seasonality	High
0.130508043307594	0.120049061600925	500	0.5	18	Seasonality	High
0.154173669904859	0.148362796081312	500	0.5	18	Seasonality	High
0.176886209538025	0.182048873153433	500	0.5	18	Seasonality	High
-0.0771795285917067	-0.0622317885640405	500	0.5	18	Seasonality	High
-0.0618155381226203	-0.0675489658736764	500	0.5	18	Seasonality	High
-0.0296261043374919	-0.0204319969030324	500	0.5	18	Seasonality	High
-0.00790596027432101	-0.0170803386809776	500	0.5	18	Seasonality	High
-0.025422606519168	-0.0362952236671562	500	0.5	18	Seasonality	High
-0.0323921022851457	-0.0149106416643022	500	0.5	18	Seasonality	High
0.00699034902331048	0.0074342820575094	500	0.5	18	Seasonality	High
-0.00841345711049889	-0.0120351133804567	500	0.5	18	Seasonality	High
-0.0587876295661784	-0.0455402474030526	500	0.5	18	Seasonality	High
0.0783206793392944	0.0326368186210773	500	0.5	18	Seasonality	High
-0.0252302927337655	-0.0155597880647592	500	0.5	18	Seasonality	High
-0.082945994159657	-0.0853100186038076	500	0.5	18	Seasonality	High
-0.0508120879828761	-0.0435049504983895	500	0.5	18	Seasonality	High
-0.0661377004034713	-0.0624912665628082	500	0.5	18	Seasonality	High
-0.0516009018633772	-0.0497275651958292	500	0.5	18	Seasonality	High
0.00237928808991935	-0.00346968605089532	500	0.5	18	Seasonality	High
-0.00637485402792618	-0.0079206538666815	500	0.5	18	Seasonality	High
0.00525204132037478	0.026425341394848	500	0.5	18	Seasonality	High
-0.0331519480742325	-0.0339249464424007	500	0.5	18	Seasonality	High
