# Supplementary material for: The influence of biological, epidemiological, and treatment factors on the establishment and spread of drug-resistant Plasmodium falciparum
Source: eLife. 2022 Jul 7;11:e77634. doi: 10.7554/eLife.77634 (PMC9262398; doi:10.7554/eLife.77634)
Supplement: Figure 2—source data 2. [file elife-77634-fig2-data2.csv]

Drug	Factor_name	Interval	Median_selection_ceofficient	25Q_selection_ceofficient	75Q_selection_ceofficient
Short-acting + Long-acting drugs	Access to treatment	1	-0.0386177561947111	-0.0650772575515232	-0.0129285846139837
Short-acting + Long-acting drugs	Access to treatment	2	-0.0364032193628388	-0.0633537256777767	-0.00870255837795667
Short-acting + Long-acting drugs	Access to treatment	3	-0.0322965809726548	-0.0600896093898126	-0.00564350912618981
Short-acting + Long-acting drugs	Access to treatment	4	-0.0296614078901628	-0.0582046095436588	-0.00199595207970296
Short-acting + Long-acting drugs	Access to treatment	5	-0.0264631101646344	-0.0550712862219309	0.00106908174190219
Short-acting + Long-acting drugs	Access to treatment	6	-0.022972527956722	-0.054137467692523	0.00636514146628112
Short-acting + Long-acting drugs	Access to treatment	7	-0.0199820198520202	-0.0533366336811644	0.0101652538554604
Short-acting + Long-acting drugs	Access to treatment	8	-0.0170840904588948	-0.0509813104863974	0.0162991960657652
Short-acting + Long-acting drugs	Access to treatment	9	-0.0130711895917757	-0.0497961000060372	0.0211587950467313
Short-acting + Long-acting drugs	Access to treatment	10	-0.00924156537779909	-0.0462681997184654	0.0279725911771264
Short-acting + Long-acting drugs	Access to treatment	11	-0.00807696243927758	-0.0479914532191044	0.0319294867638656
Short-acting + Long-acting drugs	Access to treatment	12	-0.00419355283227195	-0.0445958859695465	0.0386335651433029
Short-acting + Long-acting drugs	Access to treatment	13	-0.00409149531778906	-0.0439469532044223	0.043085316066477
Short-acting + Long-acting drugs	Access to treatment	14	-0.000875329906415706	-0.0438596126223648	0.050483235785889
Short-acting + Long-acting drugs	Access to treatment	15	0.0010715180711977	-0.0422919473539328	0.0537833348776167
Short-acting + Long-acting drugs	Access to treatment	16	0.00481381692280634	-0.0420124721757863	0.0607661579104699
Short-acting + Long-acting drugs	Access to treatment	17	0.00611629281489579	-0.0422988558783385	0.0655732675114375
Short-acting + Long-acting drugs	Access to treatment	18	0.00751115519153264	-0.0416514509830293	0.0708170059920639
Short-acting + Long-acting drugs	Access to treatment	19	0.00972141004811633	-0.0405970550808422	0.0751549792200653
Short-acting + Long-acting drugs	Access to treatment	20	0.0126890554162698	-0.0384996155821449	0.0806179722016334
Short-acting + Long-acting drugs	Access to treatment	21	0.0122663150857225	-0.0399925118257406	0.0850622948980013
Short-acting + Long-acting drugs	Access to treatment	22	0.0173753623352256	-0.0373905254641452	0.090955625572986
Short-acting + Long-acting drugs	Access to treatment	23	0.0187975785155543	-0.0394885332201142	0.0977212158805142
Short-acting + Long-acting drugs	Access to treatment	24	0.0209477540945847	-0.0401752112101773	0.100916922266792
Short-acting + Long-acting drugs	Access to treatment	25	0.0242289847395193	-0.03704390358008	0.105980416255192
Short-acting + Long-acting drugs	Access to treatment	26	0.0268865878102088	-0.0352515227043878	0.113192001124137
Short-acting + Long-acting drugs	Access to treatment	27	0.0272592277829098	-0.0368560065386489	0.115162313547549
Short-acting + Long-acting drugs	Access to treatment	28	0.0295953427191762	-0.0362752905337064	0.120991824901665
Short-acting + Long-acting drugs	Access to treatment	29	0.0348270606380301	-0.0354446691274339	0.128101811527195
Short-acting + Long-acting drugs	Access to treatment	30	0.0388400832009065	-0.0335468022268447	0.137047953439287
Short-acting + Long-acting drugs	Access to treatment	31	0.037971204267538	-0.032725044107953	0.137284257078113
Short-acting + Long-acting drugs	Access to treatment	32	0.0399879409351251	-0.0330066940525416	0.1447177482209
Short-acting + Long-acting drugs	Access to treatment	33	0.0395026341656074	-0.0333723164728669	0.150046660187771
Short-acting + Long-acting drugs	Access to treatment	34	0.03982167873586	-0.0343475453745118	0.154992917556767
Short-acting + Long-acting drugs	Access to treatment	35	0.04102114932491	-0.0325899549389935	0.15303110148449
Short-acting + Long-acting drugs	Access to treatment	36	0.0415772155317616	-0.0331679180601441	0.159551063840587
Short-acting + Long-acting drugs	Access to treatment	37	0.0384977399344936	-0.032972943481779	0.157960358698726
Short-acting + Long-acting drugs	Access to treatment	38	0.0467392821946707	-0.0319056932373291	0.165702244596242
Short-acting + Long-acting drugs	Access to treatment	39	0.0450756984624591	-0.033470396731822	0.163043920416629
Short-acting + Long-acting drugs	Access to treatment	40	NA	NA	NA
Short-acting + Long-acting drugs	Degree of resistance to the long-acting drug	1	-0.0554960108064707	-0.0787851403420657	-0.029894379551617
Short-acting + Long-acting drugs	Degree of resistance to the long-acting drug	2	-0.0548984430253673	-0.0784888495913591	-0.0288059384957359
Short-acting + Long-acting drugs	Degree of resistance to the long-acting drug	3	-0.0540299429057729	-0.0786988045870569	-0.0281583753598808
Short-acting + Long-acting drugs	Degree of resistance to the long-acting drug	4	-0.0528671264728769	-0.0778745168300478	-0.0259496562934275
Short-acting + Long-acting drugs	Degree of resistance to the long-acting drug	5	-0.0502044758352472	-0.0759037368589881	-0.023654991287061
Short-acting + Long-acting drugs	Degree of resistance to the long-acting drug	6	-0.0480263016777976	-0.0749104331242052	-0.0213610100121415
Short-acting + Long-acting drugs	Degree of resistance to the long-acting drug	7	-0.0449613434754807	-0.0722000872435092	-0.0181489840808095
Short-acting + Long-acting drugs	Degree of resistance to the long-acting drug	8	-0.0415354696423942	-0.0701956093285284	-0.0133289274315308
Short-acting + Long-acting drugs	Degree of resistance to the long-acting drug	9	-0.0387602374383527	-0.0683352282989372	-0.00954553721328794
Short-acting + Long-acting drugs	Degree of resistance to the long-acting drug	10	-0.0333066441642673	-0.0647897148876483	-0.00312747892741628
Short-acting + Long-acting drugs	Degree of resistance to the long-acting drug	11	-0.0289273598244225	-0.0615333544726677	0.00281195499031989
Short-acting + Long-acting drugs	Degree of resistance to the long-acting drug	12	-0.0253886409677859	-0.0584346027024359	0.0101191673542426
Short-acting + Long-acting drugs	Degree of resistance to the long-acting drug	13	-0.0207366912607144	-0.0551331885951225	0.0165872092195505
Short-acting + Long-acting drugs	Degree of resistance to the long-acting drug	14	-0.0151765805793426	-0.0508084316244206	0.0270172475360689
Short-acting + Long-acting drugs	Degree of resistance to the long-acting drug	15	-0.0104947058443892	-0.0478740683982619	0.0340248034828972
Short-acting + Long-acting drugs	Degree of resistance to the long-acting drug	16	-0.0050740911511222	-0.0439042057564789	0.0431071326822877
Short-acting + Long-acting drugs	Degree of resistance to the long-acting drug	17	0.0011995378373389	-0.0383223340129353	0.0537916969526153
Short-acting + Long-acting drugs	Degree of resistance to the long-acting drug	18	0.00733543971084797	-0.034390686206187	0.059995312547539
Short-acting + Long-acting drugs	Degree of resistance to the long-acting drug	19	0.0124834010687846	-0.0299485224328097	0.0707735970958641
Short-acting + Long-acting drugs	Degree of resistance to the long-acting drug	20	0.0170085975770279	-0.0282769268003178	0.0750640773542404
Short-acting + Long-acting drugs	Degree of resistance to the long-acting drug	21	0.0230498174411341	-0.0239814453197118	0.0853897331146278
Short-acting + Long-acting drugs	Degree of resistance to the long-acting drug	22	0.0266518515941523	-0.0200075002812055	0.0909622461674019
Short-acting + Long-acting drugs	Degree of resistance to the long-acting drug	23	0.0322423820512415	-0.0169228571082109	0.0979762238342541
Short-acting + Long-acting drugs	Degree of resistance to the long-acting drug	24	0.0355675612097607	-0.0137973342392527	0.102345423908172
Short-acting + Long-acting drugs	Degree of resistance to the long-acting drug	25	0.0406415747367781	-0.0113570851691235	0.108779039891958
Short-acting + Long-acting drugs	Degree of resistance to the long-acting drug	26	0.0429367009537577	-0.00926630679932658	0.113426427652185
Short-acting + Long-acting drugs	Degree of resistance to the long-acting drug	27	0.0484272114235964	-0.0054335259806899	0.118437080123327
Short-acting + Long-acting drugs	Degree of resistance to the long-acting drug	28	0.0523015804771476	-0.00221011224577418	0.123289522925422
Short-acting + Long-acting drugs	Degree of resistance to the long-acting drug	29	0.0540551269865855	-0.00241182290658304	0.12467500510117
Short-acting + Long-acting drugs	Degree of resistance to the long-acting drug	30	0.0567743715930182	0.000487891417038877	0.127443324943343
Short-acting + Long-acting drugs	Degree of resistance to the long-acting drug	31	0.0600998668535661	0.00307640960091493	0.129036171148662
Short-acting + Long-acting drugs	Degree of resistance to the long-acting drug	32	0.0641191402629237	0.00473343383193083	0.135279642111286
Short-acting + Long-acting drugs	Degree of resistance to the long-acting drug	33	0.0639475249985251	0.00391447998952911	0.136000264100566
Short-acting + Long-acting drugs	Degree of resistance to the long-acting drug	34	0.0628457533814544	0.00539144089482111	0.132530198631767
Short-acting + Long-acting drugs	Degree of resistance to the long-acting drug	35	0.0643046031831742	0.00380043927200045	0.135373241782231
Short-acting + Long-acting drugs	Degree of resistance to the long-acting drug	36	0.0652887088866435	0.00437553823677539	0.13857082913407
Short-acting + Long-acting drugs	Degree of resistance to the long-acting drug	37	0.0635277503176375	0.0036480347918988	0.134549746265591
Short-acting + Long-acting drugs	Degree of resistance to the long-acting drug	38	0.065284960659361	0.0040126588290871	0.136648356237194
Short-acting + Long-acting drugs	Degree of resistance to the long-acting drug	39	0.0668536518214077	0.0057111532086202	0.136063438157888
Short-acting + Long-acting drugs	Degree of resistance to the long-acting drug	40	NA	NA	NA
Short-acting + Long-acting drugs	Degree of resistance to the short-acting drug	1	-0.0464371474927862	-0.0739984677283541	-0.0204404195658868
Short-acting + Long-acting drugs	Degree of resistance to the short-acting drug	2	-0.0441369855446719	-0.0724682449663858	-0.0162530416593938
Short-acting + Long-acting drugs	Degree of resistance to the short-acting drug	3	-0.0388865078031072	-0.0685762209497069	-0.0101141018782591
Short-acting + Long-acting drugs	Degree of resistance to the short-acting drug	4	-0.0348378570784054	-0.0658799489458596	-0.00354059492980193
Short-acting + Long-acting drugs	Degree of resistance to the short-acting drug	5	-0.0304524565151278	-0.0628817683512413	0.00212694618305711
Short-acting + Long-acting drugs	Degree of resistance to the short-acting drug	6	-0.0236102532678466	-0.0578083857416462	0.0108437699197985
Short-acting + Long-acting drugs	Degree of resistance to the short-acting drug	7	-0.0199344614780804	-0.0564505048483053	0.0200477712718564
Short-acting + Long-acting drugs	Degree of resistance to the short-acting drug	8	-0.0147550887763269	-0.0518348421025609	0.0281192622442503
Short-acting + Long-acting drugs	Degree of resistance to the short-acting drug	9	-0.0103509815120989	-0.0496668745425019	0.0388480726759415
Short-acting + Long-acting drugs	Degree of resistance to the short-acting drug	10	-0.00673873823057611	-0.046851991479936	0.0459520170197804
Short-acting + Long-acting drugs	Degree of resistance to the short-acting drug	11	-0.00300218740744297	-0.0446012979292902	0.053077054539362
Short-acting + Long-acting drugs	Degree of resistance to the short-acting drug	12	0.000298778124719223	-0.0436622587485058	0.0607670213942452
Short-acting + Long-acting drugs	Degree of resistance to the short-acting drug	13	0.00342554827248196	-0.0414643634690969	0.0691494091199361
Short-acting + Long-acting drugs	Degree of resistance to the short-acting drug	14	0.00176456165961664	-0.043070873366602	0.0678152635721672
Short-acting + Long-acting drugs	Degree of resistance to the short-acting drug	15	0.00608599253594099	-0.0412684603088274	0.0757021840191308
Short-acting + Long-acting drugs	Degree of resistance to the short-acting drug	16	0.00999964342925553	-0.0392414651029721	0.0818532617613522
Short-acting + Long-acting drugs	Degree of resistance to the short-acting drug	17	0.0124341683423816	-0.0374884921023889	0.0867072284436677
Short-acting + Long-acting drugs	Degree of resistance to the short-acting drug	18	0.00914762503035548	-0.0400681706948768	0.0801381573156734
Short-acting + Long-acting drugs	Degree of resistance to the short-acting drug	19	0.0094517545696215	-0.0390340678831419	0.0857539460577191
Short-acting + Long-acting drugs	Degree of resistance to the short-acting drug	20	0.0124618505036478	-0.0384965526011472	0.0911270287739971
Short-acting + Long-acting drugs	Degree of resistance to the short-acting drug	21	0.0135834305056959	-0.0370544339401523	0.0890763272710473
Short-acting + Long-acting drugs	Degree of resistance to the short-acting drug	22	0.0125756729820622	-0.0384740469459497	0.0881254742002732
Short-acting + Long-acting drugs	Degree of resistance to the short-acting drug	23	0.0152627362398423	-0.0367876213769189	0.0932003085433837
Short-acting + Long-acting drugs	Degree of resistance to the short-acting drug	24	0.0148920363136171	-0.0356524865365722	0.0922643946986917
Short-acting + Long-acting drugs	Degree of resistance to the short-acting drug	25	0.0178592801619722	-0.0342447118638897	0.0921554778426014
Short-acting + Long-acting drugs	Degree of resistance to the short-acting drug	26	0.0152947429769384	-0.0366609326415616	0.09308528872696
Short-acting + Long-acting drugs	Degree of resistance to the short-acting drug	27	0.0171999126739181	-0.0344633652835522	0.0966842336372701
Short-acting + Long-acting drugs	Degree of resistance to the short-acting drug	28	0.0201459086730886	-0.0333302413299948	0.0969259563176736
Short-acting + Long-acting drugs	Degree of resistance to the short-acting drug	29	0.0196921677509763	-0.0330463114466163	0.0985261516438182
Short-acting + Long-acting drugs	Degree of resistance to the short-acting drug	30	0.0187187183156194	-0.0330215327676166	0.0958121233272417
Short-acting + Long-acting drugs	Degree of resistance to the short-acting drug	31	0.0220256428932853	-0.0318742174830592	0.100333624385444
Short-acting + Long-acting drugs	Degree of resistance to the short-acting drug	32	0.0226061912391061	-0.0299362844835202	0.103235719802239
Short-acting + Long-acting drugs	Degree of resistance to the short-acting drug	33	0.0226739271736908	-0.0314050038860375	0.102114093575079
Short-acting + Long-acting drugs	Degree of resistance to the short-acting drug	34	0.0240397536095339	-0.0299118431634664	0.103340371665278
Short-acting + Long-acting drugs	Degree of resistance to the short-acting drug	35	0.024895331143597	-0.029664158576197	0.103650720911494
Short-acting + Long-acting drugs	Degree of resistance to the short-acting drug	36	0.0228131394378115	-0.030526819805767	0.101063342047321
Short-acting + Long-acting drugs	Degree of resistance to the short-acting drug	37	0.0220448728897462	-0.0298611418529749	0.102681160558813
Short-acting + Long-acting drugs	Degree of resistance to the short-acting drug	38	0.0273049312053179	-0.0276523120622123	0.10342351612597
Short-acting + Long-acting drugs	Degree of resistance to the short-acting drug	39	0.0268950528157828	-0.0265831675883754	0.105874336037003
Short-acting + Long-acting drugs	Degree of resistance to the short-acting drug	40	NA	NA	NA
