# Supplementary material for: The influence of biological, epidemiological, and treatment factors on the establishment and spread of drug-resistant Plasmodium falciparum
Source: eLife. 2022 Jul 7;11:e77634. doi: 10.7554/eLife.77634 (PMC9262398; doi:10.7554/eLife.77634)
Supplement: Figure 3—source data 1. [file elife-77634-fig3-data1.csv]

EIR	Resistance_level	Access_treatment	Factor_name	Interval	Drug_type	Median_selection_ceofficient
5	7	0.04	Fitness cost	39	Short + Long-acting drugs	-0.0307406755484028
5	7	0.04	Fitness cost	38	Short + Long-acting drugs	-0.0293203744699759
5	7	0.04	Fitness cost	37	Short + Long-acting drugs	-0.0278477922591192
5	7	0.04	Fitness cost	36	Short + Long-acting drugs	-0.0261426266153262
5	7	0.04	Fitness cost	35	Short + Long-acting drugs	-0.0244619071517826
5	7	0.04	Fitness cost	34	Short + Long-acting drugs	-0.0229214715731807
5	7	0.04	Fitness cost	33	Short + Long-acting drugs	-0.0212055739546866
5	7	0.04	Fitness cost	32	Short + Long-acting drugs	-0.0196376353784166
5	7	0.04	Fitness cost	31	Short + Long-acting drugs	-0.0181248058061507
5	7	0.04	Fitness cost	30	Short + Long-acting drugs	-0.0163024802288196
5	7	0.04	Fitness cost	29	Short + Long-acting drugs	-0.0145188116813136
5	7	0.04	Fitness cost	28	Short + Long-acting drugs	-0.0131799037249112
5	7	0.04	Fitness cost	27	Short + Long-acting drugs	-0.0113925480924347
5	7	0.04	Fitness cost	26	Short + Long-acting drugs	-0.00980751112617728
5	7	0.04	Fitness cost	25	Short + Long-acting drugs	-0.00830799290073709
5	7	0.04	Fitness cost	24	Short + Long-acting drugs	-0.00666029928317461
5	7	0.04	Fitness cost	23	Short + Long-acting drugs	-0.00478947845111845
5	7	0.04	Fitness cost	22	Short + Long-acting drugs	-0.00318905501535055
5	7	0.04	Fitness cost	21	Short + Long-acting drugs	-0.00183905600754111
5	7	0.04	Fitness cost	20	Short + Long-acting drugs	0.000324841380890546
5	7	0.04	Fitness cost	19	Short + Long-acting drugs	0.00210672514697183
5	7	0.04	Fitness cost	18	Short + Long-acting drugs	0.00411426476045726
5	7	0.04	Fitness cost	17	Short + Long-acting drugs	0.00584362692708748
5	7	0.04	Fitness cost	16	Short + Long-acting drugs	0.00763195959482095
5	7	0.04	Fitness cost	15	Short + Long-acting drugs	0.00947109944070438
5	7	0.04	Fitness cost	14	Short + Long-acting drugs	0.0113283763283214
5	7	0.04	Fitness cost	13	Short + Long-acting drugs	0.0132311859989072
5	7	0.04	Fitness cost	12	Short + Long-acting drugs	0.0153786694311411
5	7	0.04	Fitness cost	11	Short + Long-acting drugs	0.0170260951046929
5	7	0.04	Fitness cost	10	Short + Long-acting drugs	0.0187319865464169
5	7	0.04	Fitness cost	9	Short + Long-acting drugs	0.0203604152749338
5	7	0.04	Fitness cost	8	Short + Long-acting drugs	0.0223180050110977
5	7	0.04	Fitness cost	7	Short + Long-acting drugs	0.023612442609239
5	7	0.04	Fitness cost	6	Short + Long-acting drugs	0.0255816591980573
5	7	0.04	Fitness cost	5	Short + Long-acting drugs	0.0271193277370801
5	7	0.04	Fitness cost	4	Short + Long-acting drugs	0.0285317702769106
5	7	0.04	Fitness cost	3	Short + Long-acting drugs	0.0298216899996264
5	7	0.04	Fitness cost	2	Short + Long-acting drugs	0.030875350916406
5	7	0.04	Fitness cost	1	Short + Long-acting drugs	0.0320250099873454
5	7	0.04	Fitness cost	0	Short + Long-acting drugs	NA
500	7	0.04	Fitness cost	39	Short + Long-acting drugs	-0.0790317574462727
500	7	0.04	Fitness cost	38	Short + Long-acting drugs	-0.0769369265668989
500	7	0.04	Fitness cost	37	Short + Long-acting drugs	-0.0746570986002893
500	7	0.04	Fitness cost	36	Short + Long-acting drugs	-0.0724742328267663
500	7	0.04	Fitness cost	35	Short + Long-acting drugs	-0.0703914763922529
500	7	0.04	Fitness cost	34	Short + Long-acting drugs	-0.0680773120477621
500	7	0.04	Fitness cost	33	Short + Long-acting drugs	-0.065860742269895
500	7	0.04	Fitness cost	32	Short + Long-acting drugs	-0.063397104123037
500	7	0.04	Fitness cost	31	Short + Long-acting drugs	-0.0609013127965878
500	7	0.04	Fitness cost	30	Short + Long-acting drugs	-0.0586065532474864
500	7	0.04	Fitness cost	29	Short + Long-acting drugs	-0.0560359231003555
500	7	0.04	Fitness cost	28	Short + Long-acting drugs	-0.0535002471991236
500	7	0.04	Fitness cost	27	Short + Long-acting drugs	-0.0509007077388863
500	7	0.04	Fitness cost	26	Short + Long-acting drugs	-0.0484260372316835
500	7	0.04	Fitness cost	25	Short + Long-acting drugs	-0.0457222061109339
500	7	0.04	Fitness cost	24	Short + Long-acting drugs	-0.0431025686211492
500	7	0.04	Fitness cost	23	Short + Long-acting drugs	-0.0408576573542248
500	7	0.04	Fitness cost	22	Short + Long-acting drugs	-0.0379357260999933
500	7	0.04	Fitness cost	21	Short + Long-acting drugs	-0.0352673260061123
500	7	0.04	Fitness cost	20	Short + Long-acting drugs	-0.0327518377721877
500	7	0.04	Fitness cost	19	Short + Long-acting drugs	-0.029901379608955
500	7	0.04	Fitness cost	18	Short + Long-acting drugs	-0.027307384848464
500	7	0.04	Fitness cost	17	Short + Long-acting drugs	-0.0246398777289694
500	7	0.04	Fitness cost	16	Short + Long-acting drugs	-0.0216968492998115
500	7	0.04	Fitness cost	15	Short + Long-acting drugs	-0.0192822747288041
500	7	0.04	Fitness cost	14	Short + Long-acting drugs	-0.0167313906077976
500	7	0.04	Fitness cost	13	Short + Long-acting drugs	-0.013969168150433
500	7	0.04	Fitness cost	12	Short + Long-acting drugs	-0.0113168429825268
500	7	0.04	Fitness cost	11	Short + Long-acting drugs	-0.00866145359667965
500	7	0.04	Fitness cost	10	Short + Long-acting drugs	-0.00621225157636884
500	7	0.04	Fitness cost	9	Short + Long-acting drugs	-0.00338097153018026
500	7	0.04	Fitness cost	8	Short + Long-acting drugs	-0.000969045382487207
500	7	0.04	Fitness cost	7	Short + Long-acting drugs	0.00126384772942996
500	7	0.04	Fitness cost	6	Short + Long-acting drugs	0.0038929109080889
500	7	0.04	Fitness cost	5	Short + Long-acting drugs	0.00617599489771397
500	7	0.04	Fitness cost	4	Short + Long-acting drugs	0.00847925518211905
500	7	0.04	Fitness cost	3	Short + Long-acting drugs	0.0104482536741732
500	7	0.04	Fitness cost	2	Short + Long-acting drugs	0.0126614016956025
500	7	0.04	Fitness cost	1	Short + Long-acting drugs	0.0144026088315564
500	7	0.04	Fitness cost	0	Short + Long-acting drugs	NA
5	18	0.04	Fitness cost	39	Short + Long-acting drugs	-0.030999134686168
5	18	0.04	Fitness cost	38	Short + Long-acting drugs	-0.0295587722664017
5	18	0.04	Fitness cost	37	Short + Long-acting drugs	-0.0281661246048314
5	18	0.04	Fitness cost	36	Short + Long-acting drugs	-0.0268007098560318
5	18	0.04	Fitness cost	35	Short + Long-acting drugs	-0.0251290420177079
5	18	0.04	Fitness cost	34	Short + Long-acting drugs	-0.0236839537965845
5	18	0.04	Fitness cost	33	Short + Long-acting drugs	-0.0219160443177368
5	18	0.04	Fitness cost	32	Short + Long-acting drugs	-0.020276318243932
5	18	0.04	Fitness cost	31	Short + Long-acting drugs	-0.0185478859534204
5	18	0.04	Fitness cost	30	Short + Long-acting drugs	-0.0168672584877193
5	18	0.04	Fitness cost	29	Short + Long-acting drugs	-0.0150762441919694
5	18	0.04	Fitness cost	28	Short + Long-acting drugs	-0.0134041377485615
5	18	0.04	Fitness cost	27	Short + Long-acting drugs	-0.0115058299317448
5	18	0.04	Fitness cost	26	Short + Long-acting drugs	-0.00971633335455984
5	18	0.04	Fitness cost	25	Short + Long-acting drugs	-0.00786391756952247
5	18	0.04	Fitness cost	24	Short + Long-acting drugs	-0.00598807363017525
5	18	0.04	Fitness cost	23	Short + Long-acting drugs	-0.00416706944569821
5	18	0.04	Fitness cost	22	Short + Long-acting drugs	-0.00230191730982962
5	18	0.04	Fitness cost	21	Short + Long-acting drugs	-0.000408493877850682
5	18	0.04	Fitness cost	20	Short + Long-acting drugs	0.00140614098340723
5	18	0.04	Fitness cost	19	Short + Long-acting drugs	0.00333414343495073
5	18	0.04	Fitness cost	18	Short + Long-acting drugs	0.00513539484094535
5	18	0.04	Fitness cost	17	Short + Long-acting drugs	0.0070534903727188
5	18	0.04	Fitness cost	16	Short + Long-acting drugs	0.00880804061227269
5	18	0.04	Fitness cost	15	Short + Long-acting drugs	0.0107431887219148
5	18	0.04	Fitness cost	14	Short + Long-acting drugs	0.0123346521268854
5	18	0.04	Fitness cost	13	Short + Long-acting drugs	0.0140679718561423
5	18	0.04	Fitness cost	12	Short + Long-acting drugs	0.0159547297936625
5	18	0.04	Fitness cost	11	Short + Long-acting drugs	0.017488991823441
5	18	0.04	Fitness cost	10	Short + Long-acting drugs	0.0192308382237006
5	18	0.04	Fitness cost	9	Short + Long-acting drugs	0.0208153455821009
5	18	0.04	Fitness cost	8	Short + Long-acting drugs	0.0224670159071507
5	18	0.04	Fitness cost	7	Short + Long-acting drugs	0.0239566994926468
5	18	0.04	Fitness cost	6	Short + Long-acting drugs	0.0253670071956304
5	18	0.04	Fitness cost	5	Short + Long-acting drugs	0.0267296453074465
5	18	0.04	Fitness cost	4	Short + Long-acting drugs	0.0280917595967223
5	18	0.04	Fitness cost	3	Short + Long-acting drugs	0.0293294252328221
5	18	0.04	Fitness cost	2	Short + Long-acting drugs	0.0305970401467864
5	18	0.04	Fitness cost	1	Short + Long-acting drugs	0.0317212875880866
5	18	0.04	Fitness cost	0	Short + Long-acting drugs	NA
500	18	0.04	Fitness cost	39	Short + Long-acting drugs	-0.0732015961554238
500	18	0.04	Fitness cost	38	Short + Long-acting drugs	-0.0709766221366463
500	18	0.04	Fitness cost	37	Short + Long-acting drugs	-0.0689020758008669
500	18	0.04	Fitness cost	36	Short + Long-acting drugs	-0.0668413164633811
500	18	0.04	Fitness cost	35	Short + Long-acting drugs	-0.0645346431680379
500	18	0.04	Fitness cost	34	Short + Long-acting drugs	-0.062401358149329
500	18	0.04	Fitness cost	33	Short + Long-acting drugs	-0.0600624761449233
500	18	0.04	Fitness cost	32	Short + Long-acting drugs	-0.0576560288720086
500	18	0.04	Fitness cost	31	Short + Long-acting drugs	-0.0551488682629591
500	18	0.04	Fitness cost	30	Short + Long-acting drugs	-0.052714501107435
500	18	0.04	Fitness cost	29	Short + Long-acting drugs	-0.050246959639439
500	18	0.04	Fitness cost	28	Short + Long-acting drugs	-0.0476402532688184
500	18	0.04	Fitness cost	27	Short + Long-acting drugs	-0.0452083653121267
500	18	0.04	Fitness cost	26	Short + Long-acting drugs	-0.0427119348640334
500	18	0.04	Fitness cost	25	Short + Long-acting drugs	-0.0400887267288608
500	18	0.04	Fitness cost	24	Short + Long-acting drugs	-0.0376975011472883
500	18	0.04	Fitness cost	23	Short + Long-acting drugs	-0.0350625210725118
500	18	0.04	Fitness cost	22	Short + Long-acting drugs	-0.0325766621119435
500	18	0.04	Fitness cost	21	Short + Long-acting drugs	-0.0299369308457659
500	18	0.04	Fitness cost	20	Short + Long-acting drugs	-0.0272353287618111
500	18	0.04	Fitness cost	19	Short + Long-acting drugs	-0.024781437735003
500	18	0.04	Fitness cost	18	Short + Long-acting drugs	-0.0220245678919855
500	18	0.04	Fitness cost	17	Short + Long-acting drugs	-0.0195099717338589
500	18	0.04	Fitness cost	16	Short + Long-acting drugs	-0.0168943601183178
500	18	0.04	Fitness cost	15	Short + Long-acting drugs	-0.0142383627482335
500	18	0.04	Fitness cost	14	Short + Long-acting drugs	-0.0116739004429593
500	18	0.04	Fitness cost	13	Short + Long-acting drugs	-0.00924252089789937
500	18	0.04	Fitness cost	12	Short + Long-acting drugs	-0.00648270619053955
500	18	0.04	Fitness cost	11	Short + Long-acting drugs	-0.00390647301483865
500	18	0.04	Fitness cost	10	Short + Long-acting drugs	-0.00142437164188356
500	18	0.04	Fitness cost	9	Short + Long-acting drugs	0.00100200067779791
500	18	0.04	Fitness cost	8	Short + Long-acting drugs	0.00337098864295836
500	18	0.04	Fitness cost	7	Short + Long-acting drugs	0.00582852781285181
500	18	0.04	Fitness cost	6	Short + Long-acting drugs	0.00795944672490223
500	18	0.04	Fitness cost	5	Short + Long-acting drugs	0.0101105884302534
500	18	0.04	Fitness cost	4	Short + Long-acting drugs	0.0123050196357567
500	18	0.04	Fitness cost	3	Short + Long-acting drugs	0.0143675106248171
500	18	0.04	Fitness cost	2	Short + Long-acting drugs	0.0163173759410084
500	18	0.04	Fitness cost	1	Short + Long-acting drugs	0.0180544717325692
500	18	0.04	Fitness cost	0	Short + Long-acting drugs	NA
5	7	0.5	Cmax/EC50 of the long-acting drug	1	Short + Long-acting drugs	0.363766165248561
5	7	0.5	Cmax/EC50 of the long-acting drug	2	Short + Long-acting drugs	0.365889237356235
5	7	0.5	Cmax/EC50 of the long-acting drug	3	Short + Long-acting drugs	0.365228227711284
5	7	0.5	Cmax/EC50 of the long-acting drug	4	Short + Long-acting drugs	0.364206219829797
5	7	0.5	Cmax/EC50 of the long-acting drug	5	Short + Long-acting drugs	0.36097937456333
5	7	0.5	Cmax/EC50 of the long-acting drug	6	Short + Long-acting drugs	0.355274278135647
5	7	0.5	Cmax/EC50 of the long-acting drug	7	Short + Long-acting drugs	0.346681607954929
5	7	0.5	Cmax/EC50 of the long-acting drug	8	Short + Long-acting drugs	0.334662046501048
5	7	0.5	Cmax/EC50 of the long-acting drug	9	Short + Long-acting drugs	0.320451344052315
5	7	0.5	Cmax/EC50 of the long-acting drug	10	Short + Long-acting drugs	0.301100348163251
5	7	0.5	Cmax/EC50 of the long-acting drug	11	Short + Long-acting drugs	0.282819914817475
5	7	0.5	Cmax/EC50 of the long-acting drug	12	Short + Long-acting drugs	0.261311366889116
5	7	0.5	Cmax/EC50 of the long-acting drug	13	Short + Long-acting drugs	0.238700504112808
5	7	0.5	Cmax/EC50 of the long-acting drug	14	Short + Long-acting drugs	0.215296106849479
5	7	0.5	Cmax/EC50 of the long-acting drug	15	Short + Long-acting drugs	0.191795292851142
5	7	0.5	Cmax/EC50 of the long-acting drug	16	Short + Long-acting drugs	0.172680618821986
5	7	0.5	Cmax/EC50 of the long-acting drug	17	Short + Long-acting drugs	0.14368461325113
5	7	0.5	Cmax/EC50 of the long-acting drug	18	Short + Long-acting drugs	0.118697711852656
5	7	0.5	Cmax/EC50 of the long-acting drug	19	Short + Long-acting drugs	0.0943081977059062
5	7	0.5	Cmax/EC50 of the long-acting drug	20	Short + Long-acting drugs	0.0763437346386289
5	7	0.5	Cmax/EC50 of the long-acting drug	21	Short + Long-acting drugs	0.0577298855127859
5	7	0.5	Cmax/EC50 of the long-acting drug	22	Short + Long-acting drugs	0.0428854822321079
5	7	0.5	Cmax/EC50 of the long-acting drug	23	Short + Long-acting drugs	0.0262747350086202
5	7	0.5	Cmax/EC50 of the long-acting drug	24	Short + Long-acting drugs	0.0173484983929089
5	7	0.5	Cmax/EC50 of the long-acting drug	25	Short + Long-acting drugs	0.00861606424633722
5	7	0.5	Cmax/EC50 of the long-acting drug	26	Short + Long-acting drugs	-0.000141264524105872
5	7	0.5	Cmax/EC50 of the long-acting drug	27	Short + Long-acting drugs	-0.00581587071097579
5	7	0.5	Cmax/EC50 of the long-acting drug	28	Short + Long-acting drugs	-0.00824003681671648
5	7	0.5	Cmax/EC50 of the long-acting drug	29	Short + Long-acting drugs	-0.013167074583291
5	7	0.5	Cmax/EC50 of the long-acting drug	30	Short + Long-acting drugs	-0.0169840471217455
5	7	0.5	Cmax/EC50 of the long-acting drug	31	Short + Long-acting drugs	-0.0169505652082327
5	7	0.5	Cmax/EC50 of the long-acting drug	32	Short + Long-acting drugs	-0.0190855606672119
5	7	0.5	Cmax/EC50 of the long-acting drug	33	Short + Long-acting drugs	-0.0200213565347438
5	7	0.5	Cmax/EC50 of the long-acting drug	34	Short + Long-acting drugs	-0.0191019104874709
5	7	0.5	Cmax/EC50 of the long-acting drug	35	Short + Long-acting drugs	-0.0206569090102391
5	7	0.5	Cmax/EC50 of the long-acting drug	36	Short + Long-acting drugs	-0.0206044390199922
5	7	0.5	Cmax/EC50 of the long-acting drug	37	Short + Long-acting drugs	-0.0202057759559965
5	7	0.5	Cmax/EC50 of the long-acting drug	38	Short + Long-acting drugs	-0.0189473617688838
5	7	0.5	Cmax/EC50 of the long-acting drug	39	Short + Long-acting drugs	-0.01891351791176
5	7	0.5	Cmax/EC50 of the long-acting drug	40	Short + Long-acting drugs	NA
500	7	0.5	Cmax/EC50 of the long-acting drug	1	Short + Long-acting drugs	0.187913321700436
500	7	0.5	Cmax/EC50 of the long-acting drug	2	Short + Long-acting drugs	0.187188257525398
500	7	0.5	Cmax/EC50 of the long-acting drug	3	Short + Long-acting drugs	0.185120060874709
500	7	0.5	Cmax/EC50 of the long-acting drug	4	Short + Long-acting drugs	0.182051357429258
500	7	0.5	Cmax/EC50 of the long-acting drug	5	Short + Long-acting drugs	0.178659632621847
500	7	0.5	Cmax/EC50 of the long-acting drug	6	Short + Long-acting drugs	0.173833314178459
500	7	0.5	Cmax/EC50 of the long-acting drug	7	Short + Long-acting drugs	0.167156437382484
500	7	0.5	Cmax/EC50 of the long-acting drug	8	Short + Long-acting drugs	0.159092599382141
500	7	0.5	Cmax/EC50 of the long-acting drug	9	Short + Long-acting drugs	0.1508005160546
500	7	0.5	Cmax/EC50 of the long-acting drug	10	Short + Long-acting drugs	0.138755110395569
500	7	0.5	Cmax/EC50 of the long-acting drug	11	Short + Long-acting drugs	0.124942210273731
500	7	0.5	Cmax/EC50 of the long-acting drug	12	Short + Long-acting drugs	0.110150235912567
500	7	0.5	Cmax/EC50 of the long-acting drug	13	Short + Long-acting drugs	0.0943801011679278
500	7	0.5	Cmax/EC50 of the long-acting drug	14	Short + Long-acting drugs	0.0791339444231567
500	7	0.5	Cmax/EC50 of the long-acting drug	15	Short + Long-acting drugs	0.0611135030323404
500	7	0.5	Cmax/EC50 of the long-acting drug	16	Short + Long-acting drugs	0.0431169213521182
500	7	0.5	Cmax/EC50 of the long-acting drug	17	Short + Long-acting drugs	0.0306759458308772
500	7	0.5	Cmax/EC50 of the long-acting drug	18	Short + Long-acting drugs	0.0181750993621981
500	7	0.5	Cmax/EC50 of the long-acting drug	19	Short + Long-acting drugs	0.00697489452612485
500	7	0.5	Cmax/EC50 of the long-acting drug	20	Short + Long-acting drugs	-0.00317696599921968
500	7	0.5	Cmax/EC50 of the long-acting drug	21	Short + Long-acting drugs	-0.0103969744499314
500	7	0.5	Cmax/EC50 of the long-acting drug	22	Short + Long-acting drugs	-0.0186159576709681
500	7	0.5	Cmax/EC50 of the long-acting drug	23	Short + Long-acting drugs	-0.0239704509407722
500	7	0.5	Cmax/EC50 of the long-acting drug	24	Short + Long-acting drugs	-0.0283750293994748
500	7	0.5	Cmax/EC50 of the long-acting drug	25	Short + Long-acting drugs	-0.0305511351205404
500	7	0.5	Cmax/EC50 of the long-acting drug	26	Short + Long-acting drugs	-0.0331984591897314
500	7	0.5	Cmax/EC50 of the long-acting drug	27	Short + Long-acting drugs	-0.0372742057769877
500	7	0.5	Cmax/EC50 of the long-acting drug	28	Short + Long-acting drugs	-0.0386460194730529
500	7	0.5	Cmax/EC50 of the long-acting drug	29	Short + Long-acting drugs	-0.0380260955515971
500	7	0.5	Cmax/EC50 of the long-acting drug	30	Short + Long-acting drugs	-0.0382677408537016
500	7	0.5	Cmax/EC50 of the long-acting drug	31	Short + Long-acting drugs	-0.0419984449058948
500	7	0.5	Cmax/EC50 of the long-acting drug	32	Short + Long-acting drugs	-0.0431241196148674
500	7	0.5	Cmax/EC50 of the long-acting drug	33	Short + Long-acting drugs	-0.0453267200278297
500	7	0.5	Cmax/EC50 of the long-acting drug	34	Short + Long-acting drugs	-0.0455401906297767
500	7	0.5	Cmax/EC50 of the long-acting drug	35	Short + Long-acting drugs	-0.0451313106861227
500	7	0.5	Cmax/EC50 of the long-acting drug	36	Short + Long-acting drugs	-0.0430164652996616
500	7	0.5	Cmax/EC50 of the long-acting drug	37	Short + Long-acting drugs	-0.0439442729568778
500	7	0.5	Cmax/EC50 of the long-acting drug	38	Short + Long-acting drugs	-0.0449521690037902
500	7	0.5	Cmax/EC50 of the long-acting drug	39	Short + Long-acting drugs	-0.0403073013539285
500	7	0.5	Cmax/EC50 of the long-acting drug	40	Short + Long-acting drugs	NA
5	18	0.5	Cmax/EC50 of the long-acting drug	1	Short + Long-acting drugs	0.409428985889519
5	18	0.5	Cmax/EC50 of the long-acting drug	2	Short + Long-acting drugs	0.403488506777855
5	18	0.5	Cmax/EC50 of the long-acting drug	3	Short + Long-acting drugs	0.39533080708061
5	18	0.5	Cmax/EC50 of the long-acting drug	4	Short + Long-acting drugs	0.386201249631954
5	18	0.5	Cmax/EC50 of the long-acting drug	5	Short + Long-acting drugs	0.376148008018895
5	18	0.5	Cmax/EC50 of the long-acting drug	6	Short + Long-acting drugs	0.365684926688253
5	18	0.5	Cmax/EC50 of the long-acting drug	7	Short + Long-acting drugs	0.354172254775079
5	18	0.5	Cmax/EC50 of the long-acting drug	8	Short + Long-acting drugs	0.342312438837391
5	18	0.5	Cmax/EC50 of the long-acting drug	9	Short + Long-acting drugs	0.331551240043476
5	18	0.5	Cmax/EC50 of the long-acting drug	10	Short + Long-acting drugs	0.318851176236113
5	18	0.5	Cmax/EC50 of the long-acting drug	11	Short + Long-acting drugs	0.306475939182815
5	18	0.5	Cmax/EC50 of the long-acting drug	12	Short + Long-acting drugs	0.292203537280195
5	18	0.5	Cmax/EC50 of the long-acting drug	13	Short + Long-acting drugs	0.28275570119573
5	18	0.5	Cmax/EC50 of the long-acting drug	14	Short + Long-acting drugs	0.266370821124001
5	18	0.5	Cmax/EC50 of the long-acting drug	15	Short + Long-acting drugs	0.252733105345365
5	18	0.5	Cmax/EC50 of the long-acting drug	16	Short + Long-acting drugs	0.234519301052166
5	18	0.5	Cmax/EC50 of the long-acting drug	17	Short + Long-acting drugs	0.217226389391253
5	18	0.5	Cmax/EC50 of the long-acting drug	18	Short + Long-acting drugs	0.199794957759433
5	18	0.5	Cmax/EC50 of the long-acting drug	19	Short + Long-acting drugs	0.18159689893598
5	18	0.5	Cmax/EC50 of the long-acting drug	20	Short + Long-acting drugs	0.162491004946494
5	18	0.5	Cmax/EC50 of the long-acting drug	21	Short + Long-acting drugs	0.142040116485475
5	18	0.5	Cmax/EC50 of the long-acting drug	22	Short + Long-acting drugs	0.122288794783235
5	18	0.5	Cmax/EC50 of the long-acting drug	23	Short + Long-acting drugs	0.100474876481913
5	18	0.5	Cmax/EC50 of the long-acting drug	24	Short + Long-acting drugs	0.0806850943395572
5	18	0.5	Cmax/EC50 of the long-acting drug	25	Short + Long-acting drugs	0.0602507045173599
5	18	0.5	Cmax/EC50 of the long-acting drug	26	Short + Long-acting drugs	0.0448466792432564
5	18	0.5	Cmax/EC50 of the long-acting drug	27	Short + Long-acting drugs	0.0280183931647841
5	18	0.5	Cmax/EC50 of the long-acting drug	28	Short + Long-acting drugs	0.0168038313271625
5	18	0.5	Cmax/EC50 of the long-acting drug	29	Short + Long-acting drugs	0.00558240890256037
5	18	0.5	Cmax/EC50 of the long-acting drug	30	Short + Long-acting drugs	-0.00394622398884392
5	18	0.5	Cmax/EC50 of the long-acting drug	31	Short + Long-acting drugs	-0.0107328568724269
5	18	0.5	Cmax/EC50 of the long-acting drug	32	Short + Long-acting drugs	-0.0160778227562881
5	18	0.5	Cmax/EC50 of the long-acting drug	33	Short + Long-acting drugs	-0.0179611889228361
5	18	0.5	Cmax/EC50 of the long-acting drug	34	Short + Long-acting drugs	-0.0216590494757449
5	18	0.5	Cmax/EC50 of the long-acting drug	35	Short + Long-acting drugs	-0.0236320786707425
5	18	0.5	Cmax/EC50 of the long-acting drug	36	Short + Long-acting drugs	-0.0227076185835281
5	18	0.5	Cmax/EC50 of the long-acting drug	37	Short + Long-acting drugs	-0.0237328914302662
5	18	0.5	Cmax/EC50 of the long-acting drug	38	Short + Long-acting drugs	-0.021607130463381
5	18	0.5	Cmax/EC50 of the long-acting drug	39	Short + Long-acting drugs	-0.0257799168362907
5	18	0.5	Cmax/EC50 of the long-acting drug	40	Short + Long-acting drugs	NA
500	18	0.5	Cmax/EC50 of the long-acting drug	1	Short + Long-acting drugs	0.22030741143809
500	18	0.5	Cmax/EC50 of the long-acting drug	2	Short + Long-acting drugs	0.218008700255336
500	18	0.5	Cmax/EC50 of the long-acting drug	3	Short + Long-acting drugs	0.213196186574837
500	18	0.5	Cmax/EC50 of the long-acting drug	4	Short + Long-acting drugs	0.209843823100649
500	18	0.5	Cmax/EC50 of the long-acting drug	5	Short + Long-acting drugs	0.202976107135248
500	18	0.5	Cmax/EC50 of the long-acting drug	6	Short + Long-acting drugs	0.195969397187135
500	18	0.5	Cmax/EC50 of the long-acting drug	7	Short + Long-acting drugs	0.189310786289995
500	18	0.5	Cmax/EC50 of the long-acting drug	8	Short + Long-acting drugs	0.182048696456545
500	18	0.5	Cmax/EC50 of the long-acting drug	9	Short + Long-acting drugs	0.175594422285055
500	18	0.5	Cmax/EC50 of the long-acting drug	10	Short + Long-acting drugs	0.168378635770411
500	18	0.5	Cmax/EC50 of the long-acting drug	11	Short + Long-acting drugs	0.162251381108196
500	18	0.5	Cmax/EC50 of the long-acting drug	12	Short + Long-acting drugs	0.156230484753651
500	18	0.5	Cmax/EC50 of the long-acting drug	13	Short + Long-acting drugs	0.149224252739986
500	18	0.5	Cmax/EC50 of the long-acting drug	14	Short + Long-acting drugs	0.137100487718921
500	18	0.5	Cmax/EC50 of the long-acting drug	15	Short + Long-acting drugs	0.127659433839305
500	18	0.5	Cmax/EC50 of the long-acting drug	16	Short + Long-acting drugs	0.112898422280132
500	18	0.5	Cmax/EC50 of the long-acting drug	17	Short + Long-acting drugs	0.100279648174331
500	18	0.5	Cmax/EC50 of the long-acting drug	18	Short + Long-acting drugs	0.0850866801938632
500	18	0.5	Cmax/EC50 of the long-acting drug	19	Short + Long-acting drugs	0.0673727653753154
500	18	0.5	Cmax/EC50 of the long-acting drug	20	Short + Long-acting drugs	0.0529140084635678
500	18	0.5	Cmax/EC50 of the long-acting drug	21	Short + Long-acting drugs	0.0401979286505088
500	18	0.5	Cmax/EC50 of the long-acting drug	22	Short + Long-acting drugs	0.0282186764699491
500	18	0.5	Cmax/EC50 of the long-acting drug	23	Short + Long-acting drugs	0.0165963051822314
500	18	0.5	Cmax/EC50 of the long-acting drug	24	Short + Long-acting drugs	0.011761592184367
500	18	0.5	Cmax/EC50 of the long-acting drug	25	Short + Long-acting drugs	0.00127676117413697
500	18	0.5	Cmax/EC50 of the long-acting drug	26	Short + Long-acting drugs	-0.00661986262379285
500	18	0.5	Cmax/EC50 of the long-acting drug	27	Short + Long-acting drugs	-0.0150407954630523
500	18	0.5	Cmax/EC50 of the long-acting drug	28	Short + Long-acting drugs	-0.0193733396626343
500	18	0.5	Cmax/EC50 of the long-acting drug	29	Short + Long-acting drugs	-0.0260893443234049
500	18	0.5	Cmax/EC50 of the long-acting drug	30	Short + Long-acting drugs	-0.0272872283134962
500	18	0.5	Cmax/EC50 of the long-acting drug	31	Short + Long-acting drugs	-0.0305769358234271
500	18	0.5	Cmax/EC50 of the long-acting drug	32	Short + Long-acting drugs	-0.0346662707556015
500	18	0.5	Cmax/EC50 of the long-acting drug	33	Short + Long-acting drugs	-0.0362051287634758
500	18	0.5	Cmax/EC50 of the long-acting drug	34	Short + Long-acting drugs	-0.0383628968317027
500	18	0.5	Cmax/EC50 of the long-acting drug	35	Short + Long-acting drugs	-0.039208673179912
500	18	0.5	Cmax/EC50 of the long-acting drug	36	Short + Long-acting drugs	-0.0380262848113972
500	18	0.5	Cmax/EC50 of the long-acting drug	37	Short + Long-acting drugs	-0.0396041187116493
500	18	0.5	Cmax/EC50 of the long-acting drug	38	Short + Long-acting drugs	-0.0404166591269249
500	18	0.5	Cmax/EC50 of the long-acting drug	39	Short + Long-acting drugs	-0.035788137400335
500	18	0.5	Cmax/EC50 of the long-acting drug	40	Short + Long-acting drugs	NA
5	2.5	0.04	Fitness cost	39	Long-acting drug	-0.058787152437278
5	2.5	0.04	Fitness cost	38	Long-acting drug	-0.0572708811081028
5	2.5	0.04	Fitness cost	37	Long-acting drug	-0.0557837093297781
5	2.5	0.04	Fitness cost	36	Long-acting drug	-0.0542097128521554
5	2.5	0.04	Fitness cost	35	Long-acting drug	-0.052394095263704
5	2.5	0.04	Fitness cost	34	Long-acting drug	-0.0506526124521505
5	2.5	0.04	Fitness cost	33	Long-acting drug	-0.0489398899444039
5	2.5	0.04	Fitness cost	32	Long-acting drug	-0.0471840871091555
5	2.5	0.04	Fitness cost	31	Long-acting drug	-0.045504871486069
5	2.5	0.04	Fitness cost	30	Long-acting drug	-0.0438312321535157
5	2.5	0.04	Fitness cost	29	Long-acting drug	-0.0421669048985361
5	2.5	0.04	Fitness cost	28	Long-acting drug	-0.0406774769272186
5	2.5	0.04	Fitness cost	27	Long-acting drug	-0.0390428141419628
5	2.5	0.04	Fitness cost	26	Long-acting drug	-0.0374721953020893
5	2.5	0.04	Fitness cost	25	Long-acting drug	-0.0359521567136763
5	2.5	0.04	Fitness cost	24	Long-acting drug	-0.034464192289945
5	2.5	0.04	Fitness cost	23	Long-acting drug	-0.0329002389618853
5	2.5	0.04	Fitness cost	22	Long-acting drug	-0.0313361378317468
5	2.5	0.04	Fitness cost	21	Long-acting drug	-0.0296739125779348
5	2.5	0.04	Fitness cost	20	Long-acting drug	-0.0281014328376125
5	2.5	0.04	Fitness cost	19	Long-acting drug	-0.0264126188571537
5	2.5	0.04	Fitness cost	18	Long-acting drug	-0.0247050859263041
5	2.5	0.04	Fitness cost	17	Long-acting drug	-0.022930745665187
5	2.5	0.04	Fitness cost	16	Long-acting drug	-0.0212870615915679
5	2.5	0.04	Fitness cost	15	Long-acting drug	-0.0195086291700693
5	2.5	0.04	Fitness cost	14	Long-acting drug	-0.017838030465512
5	2.5	0.04	Fitness cost	13	Long-acting drug	-0.0161105153000885
5	2.5	0.04	Fitness cost	12	Long-acting drug	-0.0144257380907006
5	2.5	0.04	Fitness cost	11	Long-acting drug	-0.0126973426989739
5	2.5	0.04	Fitness cost	10	Long-acting drug	-0.0110285267574348
5	2.5	0.04	Fitness cost	9	Long-acting drug	-0.00932422773365323
5	2.5	0.04	Fitness cost	8	Long-acting drug	-0.00763255753252665
5	2.5	0.04	Fitness cost	7	Long-acting drug	-0.00600377842224075
5	2.5	0.04	Fitness cost	6	Long-acting drug	-0.00436895672051509
5	2.5	0.04	Fitness cost	5	Long-acting drug	-0.00282754487910714
5	2.5	0.04	Fitness cost	4	Long-acting drug	-0.00137714575943465
5	2.5	0.04	Fitness cost	3	Long-acting drug	2.83982211122125e-05
5	2.5	0.04	Fitness cost	2	Long-acting drug	0.00133556791380766
5	2.5	0.04	Fitness cost	1	Long-acting drug	0.00250239834380208
5	2.5	0.04	Fitness cost	0	Long-acting drug	NA
500	2.5	0.04	Fitness cost	39	Long-acting drug	-0.0858724018463808
500	2.5	0.04	Fitness cost	38	Long-acting drug	-0.0839601040161205
500	2.5	0.04	Fitness cost	37	Long-acting drug	-0.0817116581725855
500	2.5	0.04	Fitness cost	36	Long-acting drug	-0.0796241854771165
500	2.5	0.04	Fitness cost	35	Long-acting drug	-0.0771661821938889
500	2.5	0.04	Fitness cost	34	Long-acting drug	-0.0746982692544561
500	2.5	0.04	Fitness cost	33	Long-acting drug	-0.0722379369000982
500	2.5	0.04	Fitness cost	32	Long-acting drug	-0.0698215374863148
500	2.5	0.04	Fitness cost	31	Long-acting drug	-0.0669190509963751
500	2.5	0.04	Fitness cost	30	Long-acting drug	-0.064157074226342
500	2.5	0.04	Fitness cost	29	Long-acting drug	-0.0615452869047841
500	2.5	0.04	Fitness cost	28	Long-acting drug	-0.0588309034858903
500	2.5	0.04	Fitness cost	27	Long-acting drug	-0.0562251581777808
500	2.5	0.04	Fitness cost	26	Long-acting drug	-0.0535228350364016
500	2.5	0.04	Fitness cost	25	Long-acting drug	-0.0508643373758821
500	2.5	0.04	Fitness cost	24	Long-acting drug	-0.0482582652739099
500	2.5	0.04	Fitness cost	23	Long-acting drug	-0.0456285955521122
500	2.5	0.04	Fitness cost	22	Long-acting drug	-0.0431169955799278
500	2.5	0.04	Fitness cost	21	Long-acting drug	-0.0403918344256552
500	2.5	0.04	Fitness cost	20	Long-acting drug	-0.0379406810595716
500	2.5	0.04	Fitness cost	19	Long-acting drug	-0.0353771761928416
500	2.5	0.04	Fitness cost	18	Long-acting drug	-0.0328479864096668
500	2.5	0.04	Fitness cost	17	Long-acting drug	-0.0303858865917804
500	2.5	0.04	Fitness cost	16	Long-acting drug	-0.0277940170344225
500	2.5	0.04	Fitness cost	15	Long-acting drug	-0.0253547369396873
500	2.5	0.04	Fitness cost	14	Long-acting drug	-0.0227229691002104
500	2.5	0.04	Fitness cost	13	Long-acting drug	-0.0201414194326449
500	2.5	0.04	Fitness cost	12	Long-acting drug	-0.0174825198799218
500	2.5	0.04	Fitness cost	11	Long-acting drug	-0.0149118292885923
500	2.5	0.04	Fitness cost	10	Long-acting drug	-0.0123643047808299
500	2.5	0.04	Fitness cost	9	Long-acting drug	-0.00995575635095645
500	2.5	0.04	Fitness cost	8	Long-acting drug	-0.00731625824756257
500	2.5	0.04	Fitness cost	7	Long-acting drug	-0.00489644416921314
500	2.5	0.04	Fitness cost	6	Long-acting drug	-0.00214727259371934
500	2.5	0.04	Fitness cost	5	Long-acting drug	0.000576144331179182
500	2.5	0.04	Fitness cost	4	Long-acting drug	0.00297775917414829
500	2.5	0.04	Fitness cost	3	Long-acting drug	0.00544860123389281
500	2.5	0.04	Fitness cost	2	Long-acting drug	0.00774198467017048
500	2.5	0.04	Fitness cost	1	Long-acting drug	0.0101734198468565
500	2.5	0.04	Fitness cost	0	Long-acting drug	NA
5	10	0.04	Fitness cost	39	Long-acting drug	-0.0180356610946723
5	10	0.04	Fitness cost	38	Long-acting drug	-0.0162016709568484
5	10	0.04	Fitness cost	37	Long-acting drug	-0.0147315491886159
5	10	0.04	Fitness cost	36	Long-acting drug	-0.01292253140337
5	10	0.04	Fitness cost	35	Long-acting drug	-0.0112684702754181
5	10	0.04	Fitness cost	34	Long-acting drug	-0.00979162052652237
5	10	0.04	Fitness cost	33	Long-acting drug	-0.00806411674912344
5	10	0.04	Fitness cost	32	Long-acting drug	-0.00653771400108252
5	10	0.04	Fitness cost	31	Long-acting drug	-0.00502013896675969
5	10	0.04	Fitness cost	30	Long-acting drug	-0.00360482678754532
5	10	0.04	Fitness cost	29	Long-acting drug	-0.00221811658800838
5	10	0.04	Fitness cost	28	Long-acting drug	-0.000619105538413209
5	10	0.04	Fitness cost	27	Long-acting drug	0.000718735894404475
5	10	0.04	Fitness cost	26	Long-acting drug	0.00226304929584257
5	10	0.04	Fitness cost	25	Long-acting drug	0.00388021072526698
5	10	0.04	Fitness cost	24	Long-acting drug	0.00549767136350795
5	10	0.04	Fitness cost	23	Long-acting drug	0.00715855475434161
5	10	0.04	Fitness cost	22	Long-acting drug	0.00898833294869161
5	10	0.04	Fitness cost	21	Long-acting drug	0.0108454343367615
5	10	0.04	Fitness cost	20	Long-acting drug	0.0127576448470149
5	10	0.04	Fitness cost	19	Long-acting drug	0.0146704824701164
5	10	0.04	Fitness cost	18	Long-acting drug	0.0165999800173304
5	10	0.04	Fitness cost	17	Long-acting drug	0.0185342688714846
5	10	0.04	Fitness cost	16	Long-acting drug	0.0204850467643441
5	10	0.04	Fitness cost	15	Long-acting drug	0.0224710402027301
5	10	0.04	Fitness cost	14	Long-acting drug	0.0242609647833337
5	10	0.04	Fitness cost	13	Long-acting drug	0.0261414966519201
5	10	0.04	Fitness cost	12	Long-acting drug	0.0278058412237251
5	10	0.04	Fitness cost	11	Long-acting drug	0.0294167117699278
5	10	0.04	Fitness cost	10	Long-acting drug	0.0310786187686871
5	10	0.04	Fitness cost	9	Long-acting drug	0.0327054912668567
5	10	0.04	Fitness cost	8	Long-acting drug	0.0343602510251228
5	10	0.04	Fitness cost	7	Long-acting drug	0.0357340347285383
5	10	0.04	Fitness cost	6	Long-acting drug	0.0371474686805015
5	10	0.04	Fitness cost	5	Long-acting drug	0.0386962257678786
5	10	0.04	Fitness cost	4	Long-acting drug	0.0399786520888055
5	10	0.04	Fitness cost	3	Long-acting drug	0.0412922064613926
5	10	0.04	Fitness cost	2	Long-acting drug	0.0423706720484504
5	10	0.04	Fitness cost	1	Long-acting drug	0.0435141597526355
5	10	0.04	Fitness cost	0	Long-acting drug	NA
500	10	0.04	Fitness cost	39	Long-acting drug	-0.0451032576471874
500	10	0.04	Fitness cost	38	Long-acting drug	-0.0429870391817759
500	10	0.04	Fitness cost	37	Long-acting drug	-0.0413652033316207
500	10	0.04	Fitness cost	36	Long-acting drug	-0.039103620602385
500	10	0.04	Fitness cost	35	Long-acting drug	-0.0368298431652191
500	10	0.04	Fitness cost	34	Long-acting drug	-0.0340121621637668
500	10	0.04	Fitness cost	33	Long-acting drug	-0.0318694262124441
500	10	0.04	Fitness cost	32	Long-acting drug	-0.0293192923736012
500	10	0.04	Fitness cost	31	Long-acting drug	-0.0266465806469349
500	10	0.04	Fitness cost	30	Long-acting drug	-0.0242430815644745
500	10	0.04	Fitness cost	29	Long-acting drug	-0.0218650868761191
500	10	0.04	Fitness cost	28	Long-acting drug	-0.0194436871273184
500	10	0.04	Fitness cost	27	Long-acting drug	-0.0166274174061845
500	10	0.04	Fitness cost	26	Long-acting drug	-0.0141827217262875
500	10	0.04	Fitness cost	25	Long-acting drug	-0.0117778104725232
500	10	0.04	Fitness cost	24	Long-acting drug	-0.00927088729321177
500	10	0.04	Fitness cost	23	Long-acting drug	-0.00654528968601638
500	10	0.04	Fitness cost	22	Long-acting drug	-0.00411507084344072
500	10	0.04	Fitness cost	21	Long-acting drug	-0.00156384098336063
500	10	0.04	Fitness cost	20	Long-acting drug	0.000708819942582713
500	10	0.04	Fitness cost	19	Long-acting drug	0.00329541587095791
500	10	0.04	Fitness cost	18	Long-acting drug	0.00603210386411178
500	10	0.04	Fitness cost	17	Long-acting drug	0.00847494649331443
500	10	0.04	Fitness cost	16	Long-acting drug	0.0110342779989734
500	10	0.04	Fitness cost	15	Long-acting drug	0.0132918164143294
500	10	0.04	Fitness cost	14	Long-acting drug	0.0161109779901191
500	10	0.04	Fitness cost	13	Long-acting drug	0.0185502442049092
500	10	0.04	Fitness cost	12	Long-acting drug	0.0210317572724471
500	10	0.04	Fitness cost	11	Long-acting drug	0.023554743898617
500	10	0.04	Fitness cost	10	Long-acting drug	0.0262782956373174
500	10	0.04	Fitness cost	9	Long-acting drug	0.0286286453893218
500	10	0.04	Fitness cost	8	Long-acting drug	0.0312582771008042
500	10	0.04	Fitness cost	7	Long-acting drug	0.0338292998078183
500	10	0.04	Fitness cost	6	Long-acting drug	0.0359165670074365
500	10	0.04	Fitness cost	5	Long-acting drug	0.0384622385979289
500	10	0.04	Fitness cost	4	Long-acting drug	0.0405944650686775
500	10	0.04	Fitness cost	3	Long-acting drug	0.0426816371601919
500	10	0.04	Fitness cost	2	Long-acting drug	0.0447367940113533
500	10	0.04	Fitness cost	1	Long-acting drug	0.0467025827263915
500	10	0.04	Fitness cost	0	Long-acting drug	NA
5	2.5	0.5	Half-life (days) of the long-acting drug	1	Long-acting drug	0.0116711395189443
5	2.5	0.5	Half-life (days) of the long-acting drug	2	Long-acting drug	0.0118234632701259
5	2.5	0.5	Half-life (days) of the long-acting drug	3	Long-acting drug	0.0108351397034235
5	2.5	0.5	Half-life (days) of the long-acting drug	4	Long-acting drug	0.011623907526852
5	2.5	0.5	Half-life (days) of the long-acting drug	5	Long-acting drug	0.0116596704472387
5	2.5	0.5	Half-life (days) of the long-acting drug	6	Long-acting drug	0.0122611661594857
5	2.5	0.5	Half-life (days) of the long-acting drug	7	Long-acting drug	0.013583156503979
5	2.5	0.5	Half-life (days) of the long-acting drug	8	Long-acting drug	0.0140178968044344
5	2.5	0.5	Half-life (days) of the long-acting drug	9	Long-acting drug	0.0147783911550745
5	2.5	0.5	Half-life (days) of the long-acting drug	10	Long-acting drug	0.0158687352278467
5	2.5	0.5	Half-life (days) of the long-acting drug	11	Long-acting drug	0.0166756562090548
5	2.5	0.5	Half-life (days) of the long-acting drug	12	Long-acting drug	0.0187568616417591
5	2.5	0.5	Half-life (days) of the long-acting drug	13	Long-acting drug	0.0195118237904956
5	2.5	0.5	Half-life (days) of the long-acting drug	14	Long-acting drug	0.0211511996950599
5	2.5	0.5	Half-life (days) of the long-acting drug	15	Long-acting drug	0.0228723585691556
5	2.5	0.5	Half-life (days) of the long-acting drug	16	Long-acting drug	0.0243072759119973
5	2.5	0.5	Half-life (days) of the long-acting drug	17	Long-acting drug	0.0255976992180606
5	2.5	0.5	Half-life (days) of the long-acting drug	18	Long-acting drug	0.0274193094085779
5	2.5	0.5	Half-life (days) of the long-acting drug	19	Long-acting drug	0.0290709850174513
5	2.5	0.5	Half-life (days) of the long-acting drug	20	Long-acting drug	0.0304701163650106
5	2.5	0.5	Half-life (days) of the long-acting drug	21	Long-acting drug	0.031670208356692
5	2.5	0.5	Half-life (days) of the long-acting drug	22	Long-acting drug	0.0336311265467252
5	2.5	0.5	Half-life (days) of the long-acting drug	23	Long-acting drug	0.0350758602944798
5	2.5	0.5	Half-life (days) of the long-acting drug	24	Long-acting drug	0.0369423401559417
5	2.5	0.5	Half-life (days) of the long-acting drug	25	Long-acting drug	0.0384806576659528
5	2.5	0.5	Half-life (days) of the long-acting drug	26	Long-acting drug	0.0396448417234816
5	2.5	0.5	Half-life (days) of the long-acting drug	27	Long-acting drug	0.0413449897290997
5	2.5	0.5	Half-life (days) of the long-acting drug	28	Long-acting drug	0.0420455343017648
5	2.5	0.5	Half-life (days) of the long-acting drug	29	Long-acting drug	0.0431863239054259
5	2.5	0.5	Half-life (days) of the long-acting drug	30	Long-acting drug	0.0444646318063471
5	2.5	0.5	Half-life (days) of the long-acting drug	31	Long-acting drug	0.047208810322476
5	2.5	0.5	Half-life (days) of the long-acting drug	32	Long-acting drug	0.0484103753383744
5	2.5	0.5	Half-life (days) of the long-acting drug	33	Long-acting drug	0.0499025918181287
5	2.5	0.5	Half-life (days) of the long-acting drug	34	Long-acting drug	0.0511317094415153
5	2.5	0.5	Half-life (days) of the long-acting drug	35	Long-acting drug	0.0526978833821452
5	2.5	0.5	Half-life (days) of the long-acting drug	36	Long-acting drug	0.0539509410042349
5	2.5	0.5	Half-life (days) of the long-acting drug	37	Long-acting drug	0.0552765297790182
5	2.5	0.5	Half-life (days) of the long-acting drug	38	Long-acting drug	0.0572652566513038
5	2.5	0.5	Half-life (days) of the long-acting drug	39	Long-acting drug	0.0581213409750892
5	2.5	0.5	Half-life (days) of the long-acting drug	40	Long-acting drug	NA
500	2.5	0.5	Half-life (days) of the long-acting drug	1	Long-acting drug	0.0311920133313615
500	2.5	0.5	Half-life (days) of the long-acting drug	2	Long-acting drug	0.0358706587460283
500	2.5	0.5	Half-life (days) of the long-acting drug	3	Long-acting drug	0.0383995182154829
500	2.5	0.5	Half-life (days) of the long-acting drug	4	Long-acting drug	0.0413152970365844
500	2.5	0.5	Half-life (days) of the long-acting drug	5	Long-acting drug	0.0451762136927286
500	2.5	0.5	Half-life (days) of the long-acting drug	6	Long-acting drug	0.0503437158314854
500	2.5	0.5	Half-life (days) of the long-acting drug	7	Long-acting drug	0.0521682563569106
500	2.5	0.5	Half-life (days) of the long-acting drug	8	Long-acting drug	0.05733089867272
500	2.5	0.5	Half-life (days) of the long-acting drug	9	Long-acting drug	0.0619065827539206
500	2.5	0.5	Half-life (days) of the long-acting drug	10	Long-acting drug	0.0648653742065856
500	2.5	0.5	Half-life (days) of the long-acting drug	11	Long-acting drug	0.0694972870783626
500	2.5	0.5	Half-life (days) of the long-acting drug	12	Long-acting drug	0.0729623921207558
500	2.5	0.5	Half-life (days) of the long-acting drug	13	Long-acting drug	0.0768762335761447
500	2.5	0.5	Half-life (days) of the long-acting drug	14	Long-acting drug	0.0811035515084248
500	2.5	0.5	Half-life (days) of the long-acting drug	15	Long-acting drug	0.0851374171915418
500	2.5	0.5	Half-life (days) of the long-acting drug	16	Long-acting drug	0.0885218273354979
500	2.5	0.5	Half-life (days) of the long-acting drug	17	Long-acting drug	0.0923894695821039
500	2.5	0.5	Half-life (days) of the long-acting drug	18	Long-acting drug	0.0959139496037784
500	2.5	0.5	Half-life (days) of the long-acting drug	19	Long-acting drug	0.0986096542021349
500	2.5	0.5	Half-life (days) of the long-acting drug	20	Long-acting drug	0.103033454613665
500	2.5	0.5	Half-life (days) of the long-acting drug	21	Long-acting drug	0.106599437159403
500	2.5	0.5	Half-life (days) of the long-acting drug	22	Long-acting drug	0.109038134900729
500	2.5	0.5	Half-life (days) of the long-acting drug	23	Long-acting drug	0.113170826566772
500	2.5	0.5	Half-life (days) of the long-acting drug	24	Long-acting drug	0.116417155809866
500	2.5	0.5	Half-life (days) of the long-acting drug	25	Long-acting drug	0.121205414739316
500	2.5	0.5	Half-life (days) of the long-acting drug	26	Long-acting drug	0.124292509425416
500	2.5	0.5	Half-life (days) of the long-acting drug	27	Long-acting drug	0.12788201058509
500	2.5	0.5	Half-life (days) of the long-acting drug	28	Long-acting drug	0.13141951370451
500	2.5	0.5	Half-life (days) of the long-acting drug	29	Long-acting drug	0.135264278038194
500	2.5	0.5	Half-life (days) of the long-acting drug	30	Long-acting drug	0.1395459169595
500	2.5	0.5	Half-life (days) of the long-acting drug	31	Long-acting drug	0.142786703078449
500	2.5	0.5	Half-life (days) of the long-acting drug	32	Long-acting drug	0.146238003036537
500	2.5	0.5	Half-life (days) of the long-acting drug	33	Long-acting drug	0.149603542089225
500	2.5	0.5	Half-life (days) of the long-acting drug	34	Long-acting drug	0.152984583663447
500	2.5	0.5	Half-life (days) of the long-acting drug	35	Long-acting drug	0.157205819839484
500	2.5	0.5	Half-life (days) of the long-acting drug	36	Long-acting drug	0.159861636423855
500	2.5	0.5	Half-life (days) of the long-acting drug	37	Long-acting drug	0.16346614078024
500	2.5	0.5	Half-life (days) of the long-acting drug	38	Long-acting drug	0.166785850584285
500	2.5	0.5	Half-life (days) of the long-acting drug	39	Long-acting drug	0.170001199261118
500	2.5	0.5	Half-life (days) of the long-acting drug	40	Long-acting drug	NA
5	10	0.5	Cmax/EC50 of the long-acting drug	1	Long-acting drug	0.576092499771751
5	10	0.5	Cmax/EC50 of the long-acting drug	2	Long-acting drug	0.572887210506123
5	10	0.5	Cmax/EC50 of the long-acting drug	3	Long-acting drug	0.56882395233874
5	10	0.5	Cmax/EC50 of the long-acting drug	4	Long-acting drug	0.563596518575167
5	10	0.5	Cmax/EC50 of the long-acting drug	5	Long-acting drug	0.558490426651997
5	10	0.5	Cmax/EC50 of the long-acting drug	6	Long-acting drug	0.55247008793957
5	10	0.5	Cmax/EC50 of the long-acting drug	7	Long-acting drug	0.544986449134616
5	10	0.5	Cmax/EC50 of the long-acting drug	8	Long-acting drug	0.53767473621569
5	10	0.5	Cmax/EC50 of the long-acting drug	9	Long-acting drug	0.528586312848664
5	10	0.5	Cmax/EC50 of the long-acting drug	10	Long-acting drug	0.519313152606543
5	10	0.5	Cmax/EC50 of the long-acting drug	11	Long-acting drug	0.509329335402186
5	10	0.5	Cmax/EC50 of the long-acting drug	12	Long-acting drug	0.498634578352846
5	10	0.5	Cmax/EC50 of the long-acting drug	13	Long-acting drug	0.4876324709334
5	10	0.5	Cmax/EC50 of the long-acting drug	14	Long-acting drug	0.475149121622679
5	10	0.5	Cmax/EC50 of the long-acting drug	15	Long-acting drug	0.463136613851312
5	10	0.5	Cmax/EC50 of the long-acting drug	16	Long-acting drug	0.450319318247135
5	10	0.5	Cmax/EC50 of the long-acting drug	17	Long-acting drug	0.435186895914284
5	10	0.5	Cmax/EC50 of the long-acting drug	18	Long-acting drug	0.419575955113871
5	10	0.5	Cmax/EC50 of the long-acting drug	19	Long-acting drug	0.401547228742573
5	10	0.5	Cmax/EC50 of the long-acting drug	20	Long-acting drug	0.383055050705954
5	10	0.5	Cmax/EC50 of the long-acting drug	21	Long-acting drug	0.364743006547051
5	10	0.5	Cmax/EC50 of the long-acting drug	22	Long-acting drug	0.343878918996392
5	10	0.5	Cmax/EC50 of the long-acting drug	23	Long-acting drug	0.323354468726815
5	10	0.5	Cmax/EC50 of the long-acting drug	24	Long-acting drug	0.300852629407481
5	10	0.5	Cmax/EC50 of the long-acting drug	25	Long-acting drug	0.282727808393138
5	10	0.5	Cmax/EC50 of the long-acting drug	26	Long-acting drug	0.260557432987511
5	10	0.5	Cmax/EC50 of the long-acting drug	27	Long-acting drug	0.245929561434995
5	10	0.5	Cmax/EC50 of the long-acting drug	28	Long-acting drug	0.22359036077977
5	10	0.5	Cmax/EC50 of the long-acting drug	29	Long-acting drug	0.207073972675995
5	10	0.5	Cmax/EC50 of the long-acting drug	30	Long-acting drug	0.192022946273277
5	10	0.5	Cmax/EC50 of the long-acting drug	31	Long-acting drug	0.17973607074899
5	10	0.5	Cmax/EC50 of the long-acting drug	32	Long-acting drug	0.166709718416262
5	10	0.5	Cmax/EC50 of the long-acting drug	33	Long-acting drug	0.155225860556618
5	10	0.5	Cmax/EC50 of the long-acting drug	34	Long-acting drug	0.150936090473707
5	10	0.5	Cmax/EC50 of the long-acting drug	35	Long-acting drug	0.136831698079022
5	10	0.5	Cmax/EC50 of the long-acting drug	36	Long-acting drug	0.129650637177449
5	10	0.5	Cmax/EC50 of the long-acting drug	37	Long-acting drug	0.125138495414991
5	10	0.5	Cmax/EC50 of the long-acting drug	38	Long-acting drug	0.122788133181646
5	10	0.5	Cmax/EC50 of the long-acting drug	39	Long-acting drug	0.120319895939705
5	10	0.5	Cmax/EC50 of the long-acting drug	40	Long-acting drug	NA
500	10	0.5	Cmax/EC50 of the long-acting drug	1	Long-acting drug	0.503039611509262
500	10	0.5	Cmax/EC50 of the long-acting drug	2	Long-acting drug	0.503906490940083
500	10	0.5	Cmax/EC50 of the long-acting drug	3	Long-acting drug	0.499965799157665
500	10	0.5	Cmax/EC50 of the long-acting drug	4	Long-acting drug	0.49362640922578
500	10	0.5	Cmax/EC50 of the long-acting drug	5	Long-acting drug	0.489008320430219
500	10	0.5	Cmax/EC50 of the long-acting drug	6	Long-acting drug	0.484814256606592
500	10	0.5	Cmax/EC50 of the long-acting drug	7	Long-acting drug	0.48019007527703
500	10	0.5	Cmax/EC50 of the long-acting drug	8	Long-acting drug	0.477639343381215
500	10	0.5	Cmax/EC50 of the long-acting drug	9	Long-acting drug	0.470478286294846
500	10	0.5	Cmax/EC50 of the long-acting drug	10	Long-acting drug	0.464295929759013
500	10	0.5	Cmax/EC50 of the long-acting drug	11	Long-acting drug	0.460403423303751
500	10	0.5	Cmax/EC50 of the long-acting drug	12	Long-acting drug	0.451999900615374
500	10	0.5	Cmax/EC50 of the long-acting drug	13	Long-acting drug	0.44848500535139
500	10	0.5	Cmax/EC50 of the long-acting drug	14	Long-acting drug	0.442941444848614
500	10	0.5	Cmax/EC50 of the long-acting drug	15	Long-acting drug	0.437862262300666
500	10	0.5	Cmax/EC50 of the long-acting drug	16	Long-acting drug	0.43098935805834
500	10	0.5	Cmax/EC50 of the long-acting drug	17	Long-acting drug	0.423933384521819
500	10	0.5	Cmax/EC50 of the long-acting drug	18	Long-acting drug	0.420227342443214
500	10	0.5	Cmax/EC50 of the long-acting drug	19	Long-acting drug	0.411205999120892
500	10	0.5	Cmax/EC50 of the long-acting drug	20	Long-acting drug	0.399178193737372
500	10	0.5	Cmax/EC50 of the long-acting drug	21	Long-acting drug	0.392605261273226
500	10	0.5	Cmax/EC50 of the long-acting drug	22	Long-acting drug	0.381157759382039
500	10	0.5	Cmax/EC50 of the long-acting drug	23	Long-acting drug	0.371126307320534
500	10	0.5	Cmax/EC50 of the long-acting drug	24	Long-acting drug	0.363702738453279
500	10	0.5	Cmax/EC50 of the long-acting drug	25	Long-acting drug	0.350719196800033
500	10	0.5	Cmax/EC50 of the long-acting drug	26	Long-acting drug	0.3445682270497
500	10	0.5	Cmax/EC50 of the long-acting drug	27	Long-acting drug	0.337612596027327
500	10	0.5	Cmax/EC50 of the long-acting drug	28	Long-acting drug	0.330016272406158
500	10	0.5	Cmax/EC50 of the long-acting drug	29	Long-acting drug	0.32364003197261
500	10	0.5	Cmax/EC50 of the long-acting drug	30	Long-acting drug	0.315223826350661
500	10	0.5	Cmax/EC50 of the long-acting drug	31	Long-acting drug	0.312017189183176
500	10	0.5	Cmax/EC50 of the long-acting drug	32	Long-acting drug	0.311181375177773
500	10	0.5	Cmax/EC50 of the long-acting drug	33	Long-acting drug	0.3055175342853
500	10	0.5	Cmax/EC50 of the long-acting drug	34	Long-acting drug	0.303958790992683
500	10	0.5	Cmax/EC50 of the long-acting drug	35	Long-acting drug	0.296774856514358
500	10	0.5	Cmax/EC50 of the long-acting drug	36	Long-acting drug	0.302542515438739
500	10	0.5	Cmax/EC50 of the long-acting drug	37	Long-acting drug	0.301447642756997
500	10	0.5	Cmax/EC50 of the long-acting drug	38	Long-acting drug	0.297925256345938
500	10	0.5	Cmax/EC50 of the long-acting drug	39	Long-acting drug	0.305450303617754
500	10	0.5	Cmax/EC50 of the long-acting drug	40	Long-acting drug	NA
5	7	0.04	Fitness cost	39	Short-acting drug	-0.061601869164845
5	7	0.04	Fitness cost	38	Short-acting drug	-0.0601621339258002
5	7	0.04	Fitness cost	37	Short-acting drug	-0.0590108681836505
5	7	0.04	Fitness cost	36	Short-acting drug	-0.0570273898878972
5	7	0.04	Fitness cost	35	Short-acting drug	-0.0555310757195023
5	7	0.04	Fitness cost	34	Short-acting drug	-0.0539081504755064
5	7	0.04	Fitness cost	33	Short-acting drug	-0.0522601264923932
5	7	0.04	Fitness cost	32	Short-acting drug	-0.0504349700389322
5	7	0.04	Fitness cost	31	Short-acting drug	-0.0485961909993678
5	7	0.04	Fitness cost	30	Short-acting drug	-0.0469178445748578
5	7	0.04	Fitness cost	29	Short-acting drug	-0.0449624553920534
5	7	0.04	Fitness cost	28	Short-acting drug	-0.0430343184851768
5	7	0.04	Fitness cost	27	Short-acting drug	-0.0412932723897697
5	7	0.04	Fitness cost	26	Short-acting drug	-0.0392951400114375
5	7	0.04	Fitness cost	25	Short-acting drug	-0.0375590754423328
5	7	0.04	Fitness cost	24	Short-acting drug	-0.0356043107205328
5	7	0.04	Fitness cost	23	Short-acting drug	-0.0339329247231465
5	7	0.04	Fitness cost	22	Short-acting drug	-0.0320569880330795
5	7	0.04	Fitness cost	21	Short-acting drug	-0.0303288671860818
5	7	0.04	Fitness cost	20	Short-acting drug	-0.0286240138972971
5	7	0.04	Fitness cost	19	Short-acting drug	-0.0268764962522612
5	7	0.04	Fitness cost	18	Short-acting drug	-0.0250662090593472
5	7	0.04	Fitness cost	17	Short-acting drug	-0.0233480663201039
5	7	0.04	Fitness cost	16	Short-acting drug	-0.0216615180694846
5	7	0.04	Fitness cost	15	Short-acting drug	-0.0197914463865072
5	7	0.04	Fitness cost	14	Short-acting drug	-0.0183326702169964
5	7	0.04	Fitness cost	13	Short-acting drug	-0.0164101361499083
5	7	0.04	Fitness cost	12	Short-acting drug	-0.0147534325893224
5	7	0.04	Fitness cost	11	Short-acting drug	-0.0130900409292002
5	7	0.04	Fitness cost	10	Short-acting drug	-0.0111821691041961
5	7	0.04	Fitness cost	9	Short-acting drug	-0.0096038131711731
5	7	0.04	Fitness cost	8	Short-acting drug	-0.00777368134963103
5	7	0.04	Fitness cost	7	Short-acting drug	-0.00592033998071146
5	7	0.04	Fitness cost	6	Short-acting drug	-0.00422374686738148
5	7	0.04	Fitness cost	5	Short-acting drug	-0.00256778050359598
5	7	0.04	Fitness cost	4	Short-acting drug	-0.000812972940691169
5	7	0.04	Fitness cost	3	Short-acting drug	0.000881083621677284
5	7	0.04	Fitness cost	2	Short-acting drug	0.00248038114859196
5	7	0.04	Fitness cost	1	Short-acting drug	0.00418946084960761
5	7	0.04	Fitness cost	0	Short-acting drug	NA
500	7	0.04	Fitness cost	39	Short-acting drug	-0.0926601250190307
500	7	0.04	Fitness cost	38	Short-acting drug	-0.0903362105120676
500	7	0.04	Fitness cost	37	Short-acting drug	-0.088136094328689
500	7	0.04	Fitness cost	36	Short-acting drug	-0.0858193037877273
500	7	0.04	Fitness cost	35	Short-acting drug	-0.0834728260180628
500	7	0.04	Fitness cost	34	Short-acting drug	-0.0809391848350168
500	7	0.04	Fitness cost	33	Short-acting drug	-0.078476285739633
500	7	0.04	Fitness cost	32	Short-acting drug	-0.0759502209877758
500	7	0.04	Fitness cost	31	Short-acting drug	-0.0733498945301971
500	7	0.04	Fitness cost	30	Short-acting drug	-0.0707931250544023
500	7	0.04	Fitness cost	29	Short-acting drug	-0.0681350384762034
500	7	0.04	Fitness cost	28	Short-acting drug	-0.0655763671346619
500	7	0.04	Fitness cost	27	Short-acting drug	-0.0629373060837225
500	7	0.04	Fitness cost	26	Short-acting drug	-0.0602930144043243
500	7	0.04	Fitness cost	25	Short-acting drug	-0.0576404472346652
500	7	0.04	Fitness cost	24	Short-acting drug	-0.0549755930930775
500	7	0.04	Fitness cost	23	Short-acting drug	-0.0524282571866248
500	7	0.04	Fitness cost	22	Short-acting drug	-0.0499050648758882
500	7	0.04	Fitness cost	21	Short-acting drug	-0.04727470166774
500	7	0.04	Fitness cost	20	Short-acting drug	-0.0446551061209839
500	7	0.04	Fitness cost	19	Short-acting drug	-0.0420992752291918
500	7	0.04	Fitness cost	18	Short-acting drug	-0.0395110470111191
500	7	0.04	Fitness cost	17	Short-acting drug	-0.0369687252906226
500	7	0.04	Fitness cost	16	Short-acting drug	-0.0344434310666957
500	7	0.04	Fitness cost	15	Short-acting drug	-0.0319954205926629
500	7	0.04	Fitness cost	14	Short-acting drug	-0.0294648263873134
500	7	0.04	Fitness cost	13	Short-acting drug	-0.0269721151663404
500	7	0.04	Fitness cost	12	Short-acting drug	-0.0243939815000684
500	7	0.04	Fitness cost	11	Short-acting drug	-0.0219126902729175
500	7	0.04	Fitness cost	10	Short-acting drug	-0.0193406008078755
500	7	0.04	Fitness cost	9	Short-acting drug	-0.0168139581460238
500	7	0.04	Fitness cost	8	Short-acting drug	-0.0142285543979875
500	7	0.04	Fitness cost	7	Short-acting drug	-0.0117472483905955
500	7	0.04	Fitness cost	6	Short-acting drug	-0.00920139330697754
500	7	0.04	Fitness cost	5	Short-acting drug	-0.00674661224525167
500	7	0.04	Fitness cost	4	Short-acting drug	-0.00430091373438908
500	7	0.04	Fitness cost	3	Short-acting drug	-0.00176529183363029
500	7	0.04	Fitness cost	2	Short-acting drug	0.000463557404960374
500	7	0.04	Fitness cost	1	Short-acting drug	0.00263219616782888
500	7	0.04	Fitness cost	0	Short-acting drug	NA
5	18	0.04	Fitness cost	39	Short-acting drug	-0.0287076955275476
5	18	0.04	Fitness cost	38	Short-acting drug	-0.0275479795617847
5	18	0.04	Fitness cost	37	Short-acting drug	-0.0262608398346104
5	18	0.04	Fitness cost	36	Short-acting drug	-0.0248092993015261
5	18	0.04	Fitness cost	35	Short-acting drug	-0.0231429995309664
5	18	0.04	Fitness cost	34	Short-acting drug	-0.0213372723557435
5	18	0.04	Fitness cost	33	Short-acting drug	-0.0195299640989991
5	18	0.04	Fitness cost	32	Short-acting drug	-0.0177000632911385
5	18	0.04	Fitness cost	31	Short-acting drug	-0.0158731938419689
5	18	0.04	Fitness cost	30	Short-acting drug	-0.0140162438514536
5	18	0.04	Fitness cost	29	Short-acting drug	-0.0122409529530066
5	18	0.04	Fitness cost	28	Short-acting drug	-0.0104960763590954
5	18	0.04	Fitness cost	27	Short-acting drug	-0.00878619936316316
5	18	0.04	Fitness cost	26	Short-acting drug	-0.00706054509478352
5	18	0.04	Fitness cost	25	Short-acting drug	-0.00539621326373325
5	18	0.04	Fitness cost	24	Short-acting drug	-0.00370738126549988
5	18	0.04	Fitness cost	23	Short-acting drug	-0.00204840511598929
5	18	0.04	Fitness cost	22	Short-acting drug	-0.000353494117929109
5	18	0.04	Fitness cost	21	Short-acting drug	0.00135625215314154
5	18	0.04	Fitness cost	20	Short-acting drug	0.00301824028544263
5	18	0.04	Fitness cost	19	Short-acting drug	0.00474358594694739
5	18	0.04	Fitness cost	18	Short-acting drug	0.00642645437276598
5	18	0.04	Fitness cost	17	Short-acting drug	0.00805549560016314
5	18	0.04	Fitness cost	16	Short-acting drug	0.00963424581443907
5	18	0.04	Fitness cost	15	Short-acting drug	0.0111799487010615
5	18	0.04	Fitness cost	14	Short-acting drug	0.0127318594183925
5	18	0.04	Fitness cost	13	Short-acting drug	0.0142398493540421
5	18	0.04	Fitness cost	12	Short-acting drug	0.0157967000992942
5	18	0.04	Fitness cost	11	Short-acting drug	0.0173509941965255
5	18	0.04	Fitness cost	10	Short-acting drug	0.0190218170321692
5	18	0.04	Fitness cost	9	Short-acting drug	0.0207864794328127
5	18	0.04	Fitness cost	8	Short-acting drug	0.0224997697808299
5	18	0.04	Fitness cost	7	Short-acting drug	0.0242779418224969
5	18	0.04	Fitness cost	6	Short-acting drug	0.026217826229533
5	18	0.04	Fitness cost	5	Short-acting drug	0.0280185596631299
5	18	0.04	Fitness cost	4	Short-acting drug	0.0297149281878388
5	18	0.04	Fitness cost	3	Short-acting drug	0.0314150399355182
5	18	0.04	Fitness cost	2	Short-acting drug	0.0329892016255053
5	18	0.04	Fitness cost	1	Short-acting drug	0.0343612438795402
5	18	0.04	Fitness cost	0	Short-acting drug	NA
500	18	0.04	Fitness cost	39	Short-acting drug	-0.067911840598889
500	18	0.04	Fitness cost	38	Short-acting drug	-0.0659102855348951
500	18	0.04	Fitness cost	37	Short-acting drug	-0.0638781295150339
500	18	0.04	Fitness cost	36	Short-acting drug	-0.0617071900253197
500	18	0.04	Fitness cost	35	Short-acting drug	-0.0594861291344922
500	18	0.04	Fitness cost	34	Short-acting drug	-0.057121276216173
500	18	0.04	Fitness cost	33	Short-acting drug	-0.0547604336873199
500	18	0.04	Fitness cost	32	Short-acting drug	-0.0523148371677715
500	18	0.04	Fitness cost	31	Short-acting drug	-0.0498388489333221
500	18	0.04	Fitness cost	30	Short-acting drug	-0.0474124914578869
500	18	0.04	Fitness cost	29	Short-acting drug	-0.0448719644770055
500	18	0.04	Fitness cost	28	Short-acting drug	-0.042329741514293
500	18	0.04	Fitness cost	27	Short-acting drug	-0.0397574630090285
500	18	0.04	Fitness cost	26	Short-acting drug	-0.0372471384178808
500	18	0.04	Fitness cost	25	Short-acting drug	-0.0347019865622226
500	18	0.04	Fitness cost	24	Short-acting drug	-0.0321635808960638
500	18	0.04	Fitness cost	23	Short-acting drug	-0.0295901257333592
500	18	0.04	Fitness cost	22	Short-acting drug	-0.0270097083703747
500	18	0.04	Fitness cost	21	Short-acting drug	-0.02448943367175
500	18	0.04	Fitness cost	20	Short-acting drug	-0.0219276680819805
500	18	0.04	Fitness cost	19	Short-acting drug	-0.0193718272094625
500	18	0.04	Fitness cost	18	Short-acting drug	-0.0168297588160223
500	18	0.04	Fitness cost	17	Short-acting drug	-0.0143149347089065
500	18	0.04	Fitness cost	16	Short-acting drug	-0.0117175329238045
500	18	0.04	Fitness cost	15	Short-acting drug	-0.00918920520652691
500	18	0.04	Fitness cost	14	Short-acting drug	-0.00659451900096036
500	18	0.04	Fitness cost	13	Short-acting drug	-0.00399167685941287
500	18	0.04	Fitness cost	12	Short-acting drug	-0.00138729229747492
500	18	0.04	Fitness cost	11	Short-acting drug	0.00119127061535651
500	18	0.04	Fitness cost	10	Short-acting drug	0.00379577360541782
500	18	0.04	Fitness cost	9	Short-acting drug	0.00643097575541943
500	18	0.04	Fitness cost	8	Short-acting drug	0.00900448674782062
500	18	0.04	Fitness cost	7	Short-acting drug	0.0115858472315206
500	18	0.04	Fitness cost	6	Short-acting drug	0.0141421091647485
500	18	0.04	Fitness cost	5	Short-acting drug	0.0166707503259185
500	18	0.04	Fitness cost	4	Short-acting drug	0.0191311258365079
500	18	0.04	Fitness cost	3	Short-acting drug	0.0215341162670593
500	18	0.04	Fitness cost	2	Short-acting drug	0.0238706242145397
500	18	0.04	Fitness cost	1	Short-acting drug	0.0261111244577323
500	18	0.04	Fitness cost	0	Short-acting drug	NA
5	7	0.5	Half-life (days) of the long-acting drug	1	Short-acting drug	0.39515160082502
5	7	0.5	Half-life (days) of the long-acting drug	2	Short-acting drug	0.397119200854796
5	7	0.5	Half-life (days) of the long-acting drug	3	Short-acting drug	0.395560825180246
5	7	0.5	Half-life (days) of the long-acting drug	4	Short-acting drug	0.391241456033572
5	7	0.5	Half-life (days) of the long-acting drug	5	Short-acting drug	0.382496051314839
5	7	0.5	Half-life (days) of the long-acting drug	6	Short-acting drug	0.370820682052403
5	7	0.5	Half-life (days) of the long-acting drug	7	Short-acting drug	0.355773808785662
5	7	0.5	Half-life (days) of the long-acting drug	8	Short-acting drug	0.333962462958678
5	7	0.5	Half-life (days) of the long-acting drug	9	Short-acting drug	0.306556610950775
5	7	0.5	Half-life (days) of the long-acting drug	10	Short-acting drug	0.274079933726718
5	7	0.5	Half-life (days) of the long-acting drug	11	Short-acting drug	0.233532732018545
5	7	0.5	Half-life (days) of the long-acting drug	12	Short-acting drug	0.193797957363859
5	7	0.5	Half-life (days) of the long-acting drug	13	Short-acting drug	0.149707103165701
5	7	0.5	Half-life (days) of the long-acting drug	14	Short-acting drug	0.11456346236365
5	7	0.5	Half-life (days) of the long-acting drug	15	Short-acting drug	0.083221262140771
5	7	0.5	Half-life (days) of the long-acting drug	16	Short-acting drug	0.0586536315787569
5	7	0.5	Half-life (days) of the long-acting drug	17	Short-acting drug	0.0399944731893987
5	7	0.5	Half-life (days) of the long-acting drug	18	Short-acting drug	0.0266742703662201
5	7	0.5	Half-life (days) of the long-acting drug	19	Short-acting drug	0.0183586841624847
5	7	0.5	Half-life (days) of the long-acting drug	20	Short-acting drug	0.0138497515273559
5	7	0.5	Half-life (days) of the long-acting drug	21	Short-acting drug	0.0109043995998171
5	7	0.5	Half-life (days) of the long-acting drug	22	Short-acting drug	0.00766724522418034
5	7	0.5	Half-life (days) of the long-acting drug	23	Short-acting drug	0.00480776061218799
5	7	0.5	Half-life (days) of the long-acting drug	24	Short-acting drug	0.00245978492370745
5	7	0.5	Half-life (days) of the long-acting drug	25	Short-acting drug	0.00181178802040907
5	7	0.5	Half-life (days) of the long-acting drug	26	Short-acting drug	0.00164481570553865
5	7	0.5	Half-life (days) of the long-acting drug	27	Short-acting drug	-0.000215182680795428
5	7	0.5	Half-life (days) of the long-acting drug	28	Short-acting drug	-0.00157879678532191
5	7	0.5	Half-life (days) of the long-acting drug	29	Short-acting drug	-0.00226250245462167
5	7	0.5	Half-life (days) of the long-acting drug	30	Short-acting drug	-0.00228086869979173
5	7	0.5	Half-life (days) of the long-acting drug	31	Short-acting drug	-0.00112989584670861
5	7	0.5	Half-life (days) of the long-acting drug	32	Short-acting drug	-0.00140138245251954
5	7	0.5	Half-life (days) of the long-acting drug	33	Short-acting drug	-0.0017888764716512
5	7	0.5	Half-life (days) of the long-acting drug	34	Short-acting drug	-0.00230076410348987
5	7	0.5	Half-life (days) of the long-acting drug	35	Short-acting drug	-0.00291289661698155
5	7	0.5	Half-life (days) of the long-acting drug	36	Short-acting drug	-0.00238313086717559
5	7	0.5	Half-life (days) of the long-acting drug	37	Short-acting drug	-0.00231890506463051
5	7	0.5	Half-life (days) of the long-acting drug	38	Short-acting drug	-0.000494543299511666
5	7	0.5	Half-life (days) of the long-acting drug	39	Short-acting drug	0.00134096064655817
5	7	0.5	Half-life (days) of the long-acting drug	40	Short-acting drug	NA
500	7	0.5	Half-life (days) of the long-acting drug	1	Short-acting drug	0.241969771313775
500	7	0.5	Half-life (days) of the long-acting drug	2	Short-acting drug	0.236322221541162
500	7	0.5	Half-life (days) of the long-acting drug	3	Short-acting drug	0.227734492096452
500	7	0.5	Half-life (days) of the long-acting drug	4	Short-acting drug	0.21723764530547
500	7	0.5	Half-life (days) of the long-acting drug	5	Short-acting drug	0.205247599792348
500	7	0.5	Half-life (days) of the long-acting drug	6	Short-acting drug	0.189404288720056
500	7	0.5	Half-life (days) of the long-acting drug	7	Short-acting drug	0.172662947429386
500	7	0.5	Half-life (days) of the long-acting drug	8	Short-acting drug	0.15435204486832
500	7	0.5	Half-life (days) of the long-acting drug	9	Short-acting drug	0.134132001957194
500	7	0.5	Half-life (days) of the long-acting drug	10	Short-acting drug	0.113950286609136
500	7	0.5	Half-life (days) of the long-acting drug	11	Short-acting drug	0.0933633272379375
500	7	0.5	Half-life (days) of the long-acting drug	12	Short-acting drug	0.0731053527390889
500	7	0.5	Half-life (days) of the long-acting drug	13	Short-acting drug	0.0562012005183789
500	7	0.5	Half-life (days) of the long-acting drug	14	Short-acting drug	0.041492310920882
500	7	0.5	Half-life (days) of the long-acting drug	15	Short-acting drug	0.0293742524191025
500	7	0.5	Half-life (days) of the long-acting drug	16	Short-acting drug	0.0208586794079851
500	7	0.5	Half-life (days) of the long-acting drug	17	Short-acting drug	0.0140066583150936
500	7	0.5	Half-life (days) of the long-acting drug	18	Short-acting drug	0.00902773632145212
500	7	0.5	Half-life (days) of the long-acting drug	19	Short-acting drug	0.00715870803594749
500	7	0.5	Half-life (days) of the long-acting drug	20	Short-acting drug	0.00557753474249635
500	7	0.5	Half-life (days) of the long-acting drug	21	Short-acting drug	0.00480730685844971
500	7	0.5	Half-life (days) of the long-acting drug	22	Short-acting drug	0.00488691998373324
500	7	0.5	Half-life (days) of the long-acting drug	23	Short-acting drug	0.00521069184808823
500	7	0.5	Half-life (days) of the long-acting drug	24	Short-acting drug	0.00401610976492148
500	7	0.5	Half-life (days) of the long-acting drug	25	Short-acting drug	0.00425149671406628
500	7	0.5	Half-life (days) of the long-acting drug	26	Short-acting drug	0.00475105656081131
500	7	0.5	Half-life (days) of the long-acting drug	27	Short-acting drug	0.00498103533275449
500	7	0.5	Half-life (days) of the long-acting drug	28	Short-acting drug	0.00365097473454671
500	7	0.5	Half-life (days) of the long-acting drug	29	Short-acting drug	0.00280063957707408
500	7	0.5	Half-life (days) of the long-acting drug	30	Short-acting drug	0.00312307279114349
500	7	0.5	Half-life (days) of the long-acting drug	31	Short-acting drug	0.00268801910081951
500	7	0.5	Half-life (days) of the long-acting drug	32	Short-acting drug	0.00184160846904724
500	7	0.5	Half-life (days) of the long-acting drug	33	Short-acting drug	0.00215776749364156
500	7	0.5	Half-life (days) of the long-acting drug	34	Short-acting drug	0.00162334808540593
500	7	0.5	Half-life (days) of the long-acting drug	35	Short-acting drug	0.00168626012863335
500	7	0.5	Half-life (days) of the long-acting drug	36	Short-acting drug	0.00181694938622273
500	7	0.5	Half-life (days) of the long-acting drug	37	Short-acting drug	0.00165492156755106
500	7	0.5	Half-life (days) of the long-acting drug	38	Short-acting drug	0.00217245803832732
500	7	0.5	Half-life (days) of the long-acting drug	39	Short-acting drug	0.00232215280055668
500	7	0.5	Half-life (days) of the long-acting drug	40	Short-acting drug	NA
5	18	0.5	Half-life (days) of the long-acting drug	1	Short-acting drug	0.430736739644812
5	18	0.5	Half-life (days) of the long-acting drug	2	Short-acting drug	0.429335310807248
5	18	0.5	Half-life (days) of the long-acting drug	3	Short-acting drug	0.427852282050288
5	18	0.5	Half-life (days) of the long-acting drug	4	Short-acting drug	0.426374396314843
5	18	0.5	Half-life (days) of the long-acting drug	5	Short-acting drug	0.424948015710539
5	18	0.5	Half-life (days) of the long-acting drug	6	Short-acting drug	0.423170031618695
5	18	0.5	Half-life (days) of the long-acting drug	7	Short-acting drug	0.421269147144813
5	18	0.5	Half-life (days) of the long-acting drug	8	Short-acting drug	0.420364661084595
5	18	0.5	Half-life (days) of the long-acting drug	9	Short-acting drug	0.418201448577155
5	18	0.5	Half-life (days) of the long-acting drug	10	Short-acting drug	0.41728732628986
5	18	0.5	Half-life (days) of the long-acting drug	11	Short-acting drug	0.415827183191608
5	18	0.5	Half-life (days) of the long-acting drug	12	Short-acting drug	0.415010608261702
5	18	0.5	Half-life (days) of the long-acting drug	13	Short-acting drug	0.413582567977511
5	18	0.5	Half-life (days) of the long-acting drug	14	Short-acting drug	0.412573969983123
5	18	0.5	Half-life (days) of the long-acting drug	15	Short-acting drug	0.411745836295573
5	18	0.5	Half-life (days) of the long-acting drug	16	Short-acting drug	0.411189601061696
5	18	0.5	Half-life (days) of the long-acting drug	17	Short-acting drug	0.410132025068352
5	18	0.5	Half-life (days) of the long-acting drug	18	Short-acting drug	0.409414857905333
5	18	0.5	Half-life (days) of the long-acting drug	19	Short-acting drug	0.408891021566161
5	18	0.5	Half-life (days) of the long-acting drug	20	Short-acting drug	0.408485476329953
5	18	0.5	Half-life (days) of the long-acting drug	21	Short-acting drug	0.407841675634945
5	18	0.5	Half-life (days) of the long-acting drug	22	Short-acting drug	0.408025827720924
5	18	0.5	Half-life (days) of the long-acting drug	23	Short-acting drug	0.407539647556355
5	18	0.5	Half-life (days) of the long-acting drug	24	Short-acting drug	0.40743670025604
5	18	0.5	Half-life (days) of the long-acting drug	25	Short-acting drug	0.406475082750948
5	18	0.5	Half-life (days) of the long-acting drug	26	Short-acting drug	0.406739250370195
5	18	0.5	Half-life (days) of the long-acting drug	27	Short-acting drug	0.40644684204131
5	18	0.5	Half-life (days) of the long-acting drug	28	Short-acting drug	0.406341490875383
5	18	0.5	Half-life (days) of the long-acting drug	29	Short-acting drug	0.405811757197831
5	18	0.5	Half-life (days) of the long-acting drug	30	Short-acting drug	0.405951777572317
5	18	0.5	Half-life (days) of the long-acting drug	31	Short-acting drug	0.405285517327578
5	18	0.5	Half-life (days) of the long-acting drug	32	Short-acting drug	0.405324513003025
5	18	0.5	Half-life (days) of the long-acting drug	33	Short-acting drug	0.404519857394252
5	18	0.5	Half-life (days) of the long-acting drug	34	Short-acting drug	0.404545933055315
5	18	0.5	Half-life (days) of the long-acting drug	35	Short-acting drug	0.404200927756601
5	18	0.5	Half-life (days) of the long-acting drug	36	Short-acting drug	0.404045014737748
5	18	0.5	Half-life (days) of the long-acting drug	37	Short-acting drug	0.403766664950475
5	18	0.5	Half-life (days) of the long-acting drug	38	Short-acting drug	0.403972412651143
5	18	0.5	Half-life (days) of the long-acting drug	39	Short-acting drug	0.403323987007761
5	18	0.5	Half-life (days) of the long-acting drug	40	Short-acting drug	NA
500	18	0.5	Half-life (days) of the long-acting drug	1	Short-acting drug	0.276479414054426
500	18	0.5	Half-life (days) of the long-acting drug	2	Short-acting drug	0.274579100310542
500	18	0.5	Half-life (days) of the long-acting drug	3	Short-acting drug	0.272046482549191
500	18	0.5	Half-life (days) of the long-acting drug	4	Short-acting drug	0.270247556804923
500	18	0.5	Half-life (days) of the long-acting drug	5	Short-acting drug	0.268670269478319
500	18	0.5	Half-life (days) of the long-acting drug	6	Short-acting drug	0.266498074929764
500	18	0.5	Half-life (days) of the long-acting drug	7	Short-acting drug	0.264185751907518
500	18	0.5	Half-life (days) of the long-acting drug	8	Short-acting drug	0.261993525639533
500	18	0.5	Half-life (days) of the long-acting drug	9	Short-acting drug	0.259815776166599
500	18	0.5	Half-life (days) of the long-acting drug	10	Short-acting drug	0.257359906056745
500	18	0.5	Half-life (days) of the long-acting drug	11	Short-acting drug	0.256409314063987
500	18	0.5	Half-life (days) of the long-acting drug	12	Short-acting drug	0.254247021698577
500	18	0.5	Half-life (days) of the long-acting drug	13	Short-acting drug	0.251775158530239
500	18	0.5	Half-life (days) of the long-acting drug	14	Short-acting drug	0.250257405093895
500	18	0.5	Half-life (days) of the long-acting drug	15	Short-acting drug	0.24910078699148
500	18	0.5	Half-life (days) of the long-acting drug	16	Short-acting drug	0.246382183635881
500	18	0.5	Half-life (days) of the long-acting drug	17	Short-acting drug	0.245373274183536
500	18	0.5	Half-life (days) of the long-acting drug	18	Short-acting drug	0.243830300557574
500	18	0.5	Half-life (days) of the long-acting drug	19	Short-acting drug	0.242876230677909
500	18	0.5	Half-life (days) of the long-acting drug	20	Short-acting drug	0.241637865279005
500	18	0.5	Half-life (days) of the long-acting drug	21	Short-acting drug	0.239827038965693
500	18	0.5	Half-life (days) of the long-acting drug	22	Short-acting drug	0.239014918967562
500	18	0.5	Half-life (days) of the long-acting drug	23	Short-acting drug	0.238709132694182
500	18	0.5	Half-life (days) of the long-acting drug	24	Short-acting drug	0.238134312751632
500	18	0.5	Half-life (days) of the long-acting drug	25	Short-acting drug	0.237312049362663
500	18	0.5	Half-life (days) of the long-acting drug	26	Short-acting drug	0.236701618237181
500	18	0.5	Half-life (days) of the long-acting drug	27	Short-acting drug	0.235194196315271
500	18	0.5	Half-life (days) of the long-acting drug	28	Short-acting drug	0.235168068160045
500	18	0.5	Half-life (days) of the long-acting drug	29	Short-acting drug	0.234708026335079
500	18	0.5	Half-life (days) of the long-acting drug	30	Short-acting drug	0.233873259047452
500	18	0.5	Half-life (days) of the long-acting drug	31	Short-acting drug	0.233363831156467
500	18	0.5	Half-life (days) of the long-acting drug	32	Short-acting drug	0.233249149237039
500	18	0.5	Half-life (days) of the long-acting drug	33	Short-acting drug	0.232787567352515
500	18	0.5	Half-life (days) of the long-acting drug	34	Short-acting drug	0.23255520039072
500	18	0.5	Half-life (days) of the long-acting drug	35	Short-acting drug	0.231785568875451
500	18	0.5	Half-life (days) of the long-acting drug	36	Short-acting drug	0.230696922874535
500	18	0.5	Half-life (days) of the long-acting drug	37	Short-acting drug	0.230384562285292
500	18	0.5	Half-life (days) of the long-acting drug	38	Short-acting drug	0.229536733608583
500	18	0.5	Half-life (days) of the long-acting drug	39	Short-acting drug	0.230434971835578
500	18	0.5	Half-life (days) of the long-acting drug	40	Short-acting drug	NA
