# Supplementary material for: The influence of biological, epidemiological, and treatment factors on the establishment and spread of drug-resistant Plasmodium falciparum
Source: eLife. 2022 Jul 7;11:e77634. doi: 10.7554/eLife.77634 (PMC9262398; doi:10.7554/eLife.77634)
Supplement: Figure 4—source data 1. [file elife-77634-fig4-data1.csv]

eir	Selection_ceofficient	Number_mutation_imported	Number_mutation_established	Probability_establishment	Pe_L	Probability_establishment_95CI_low	Probability_establishment_95CI_high
5	-9.24e-05	88434.6965241342	213	0.00240855691681908	0.00208548475265062	0.00208548475265062	0.00273162908098754
5	0.0463754	6346.13137868017	300	0.0472728946343358	0.0420514352924119	0.0420514352924119	0.0524943539762597
5	0.0907536	3785.22022575332	300	0.0792556263857263	0.0706497503975221	0.0706497503975221	0.0878615023739305
5	0.1395401	2468.45738538298	300	0.121533392383622	0.108643369348689	0.108643369348689	0.134423415418555
5	0.1704247	2074.00091231543	300	0.144647959515638	0.129509551598138	0.129509551598138	0.159786367433138
5	0.2294169	1560.94556115515	300	0.192191199658488	0.172644059287798	0.172644059287798	0.211738340029178
5	0.2738857	1416.44410600657	300	0.211797979692824	0.190519723723848	0.190519723723848	0.2330762356618
5	0.3185007	1118.12790957698	300	0.268305618194878	0.242334534555155	0.242334534555155	0.294276701834601
5	0.3644855	1072.2890793939	300	0.279775301049948	0.252907085665414	0.252907085665414	0.306643516434482
5	0.4093432	1065.25560809597	300	0.281622549292388	0.254611639325016	0.254611639325016	0.30863345925976
500	-5.41e-05	154441.139991773	277	0.00179356355446972	0.00158253406894474	0.00158253406894474	0.0020045930399947
500	0.0364722	11054.4994354837	300	0.0271382708688765	0.0241092436460035	0.0241092436460035	0.0301672980917495
500	0.0733214	4713.96204102618	300	0.0636407330795334	0.0566720313878871	0.0566720313878871	0.0706094347711797
500	0.115099	2951.66898825558	300	0.101637413000466	0.0907361987599906	0.0907361987599906	0.112538627240941
500	0.1520349	2306.09749283713	300	0.13008990336784	0.116359723682171	0.116359723682171	0.143820083053509
500	0.1805219	2090.5109035178	300	0.143505589707844	0.12847671277469	0.12847671277469	0.158534466640998
500	0.2188707	1822.13106279822	300	0.164642382825797	0.147614003914758	0.147614003914758	0.181670761736836
500	0.2560566	1540.25584109369	300	0.194772837080741	0.174994806567019	0.174994806567019	0.214550867594463
500	0.2940586	1494.76197815071	300	0.200700850292669	0.180396021501051	0.180396021501051	0.221005679084287
500	0.3288907	1339.09827546895	300	0.224031354155048	0.201699420208424	0.201699420208424	0.246363288101672
5	0.00103382510739507	76266	271	0.00355335273909737	0.00313103748081113	0.00313103748081113	0.00397566799738361
5	0.0708560443616248	5836	300	0.0514050719671008	0.045739525385741	0.045739525385741	0.0570706185484606
5	0.110757357493381	3610	300	0.0831024930747922	0.0740977797163102	0.0740977797163102	0.0921072064332742
5	0.219340762894732	1816	300	0.165198237885463	0.148118054350457	0.148118054350457	0.182278421420469
5	0.282770433005563	1747	300	0.171722953634803	0.154037687208096	0.154037687208096	0.18940822006151
5	0.351801358408803	1287	300	0.233100233100233	0.210000473792953	0.210000473792953	0.256199992407513
5	0.423480505543419	1115	300	0.269058295964126	0.243027754499997	0.243027754499997	0.295088837428255
5	0.49445399689186	1023	300	0.293255131964809	0.265357175205711	0.265357175205711	0.321153088723907
5	0.566613096160737	927	300	0.323624595469256	0.293506266824193	0.293506266824193	0.353742924114319
5	0.635130847766778	860	300	0.348837209302326	0.316983278275197	0.316983278275197	0.380691140329455
500	0.00240719158884175	64982	300	0.00461666307592872	0.00409544579293971	0.00409544579293971	0.00513788035891773
500	0.0652968426038015	7102	300	0.0422416220782878	0.037563581220833	0.037563581220833	0.0469196629357426
500	0.129254599917592	4109	300	0.0730104648332928	0.0650558716600683	0.0650558716600683	0.0809650580065173
500	0.192086249998994	2923	300	0.10263427984947	0.0916322550139016	0.0916322550139016	0.113636304685038
500	0.244177138429273	2551	300	0.117600940807526	0.105100113424081	0.105100113424081	0.130101768190971
500	0.318322871234879	1653	300	0.181488203266788	0.162907749472229	0.162907749472229	0.200068657061347
500	0.382091063889521	1554	300	0.193050193050193	0.173426129334857	0.173426129334857	0.212674256765529
500	0.448074563140758	1411	300	0.212615166548547	0.191265887805151	0.191265887805151	0.233964445291943
500	0.509055222018559	1310	300	0.229007633587786	0.206252968795846	0.206252968795846	0.251762298379726
500	0.570503077221009	1161	300	0.258397932816537	0.233217108394645	0.233217108394645	0.283578757238429
5	-0.00354386499864218	106293	0	0	0	0	0
5	0.0406304911316223	7559	300	0.039687789390131	0.0352867163222394	0.0352867163222394	0.0440888624580226
5	0.0946316141946767	3165	300	0.0947867298578199	0.0845816022333137	0.0845816022333137	0.104991857482326
5	0.139891485020408	2597	300	0.115517905275318	0.103224016720928	0.103224016720928	0.127811793829708
5	0.186523717250697	1850	300	0.162162162162162	0.145365423884831	0.145365423884831	0.178958900439493
5	0.234211352040106	1454	300	0.206327372764787	0.185526910183468	0.185526910183468	0.227127835346106
5	0.280989053543794	1336	300	0.224550898203593	0.2021746696558	0.2021746696558	0.246927126751386
5	0.327811804973755	1258	300	0.238473767885533	0.214924441354444	0.214924441354444	0.262023094416622
5	0.377233260397689	1070	300	0.280373831775701	0.253459326905417	0.253459326905417	0.307288336645985
5	0.42134036997911	1121	300	0.267618198037467	0.241701488678774	0.241701488678774	0.29353490739616
500	-2.66753173599398e-05	153908	14	9.09634327000546e-05	4.33160399487256e-05	4.33160399487256e-05	0.000138610825451384
500	0.0319878765260418	9302	300	0.0322511287895076	0.0286609035124425	0.0286609035124425	0.0358413540665728
500	0.0686060295182117	4987	300	0.060156406657309	0.0535569964652812	0.0535569964652812	0.0667558168493368
500	0.101050972240155	3334	300	0.0899820035992801	0.0802684957891946	0.0802684957891946	0.0996955114093656
500	0.133833050679444	2689	300	0.111565637783563	0.0996658677048738	0.0996658677048738	0.123465407862252
500	0.167557990309163	2017	300	0.14873574615766	0.133206763713448	0.133206763713448	0.164264728601872
500	0.201286389080302	1912	300	0.156903765690377	0.140600771058768	0.140600771058768	0.173206760321986
500	0.232976093030579	1946	300	0.154162384378212	0.13811821049008	0.13811821049008	0.170206558266344
500	0.263966000091166	1812	300	0.165562913907285	0.148448765082915	0.148448765082915	0.182677062731655
500	0.301716860430745	1619	300	0.185299567634342	0.16637313238227	0.16637313238227	0.204226002886414
